# Supplementary material
Source: PubMed Central journal article supplement (PMC10591878)

A/D Converter Channel 1 from Sample 29 (06.10.19 EY-6-43 F28) of Euna 2019 Jun.wiff Max. 10.0 %

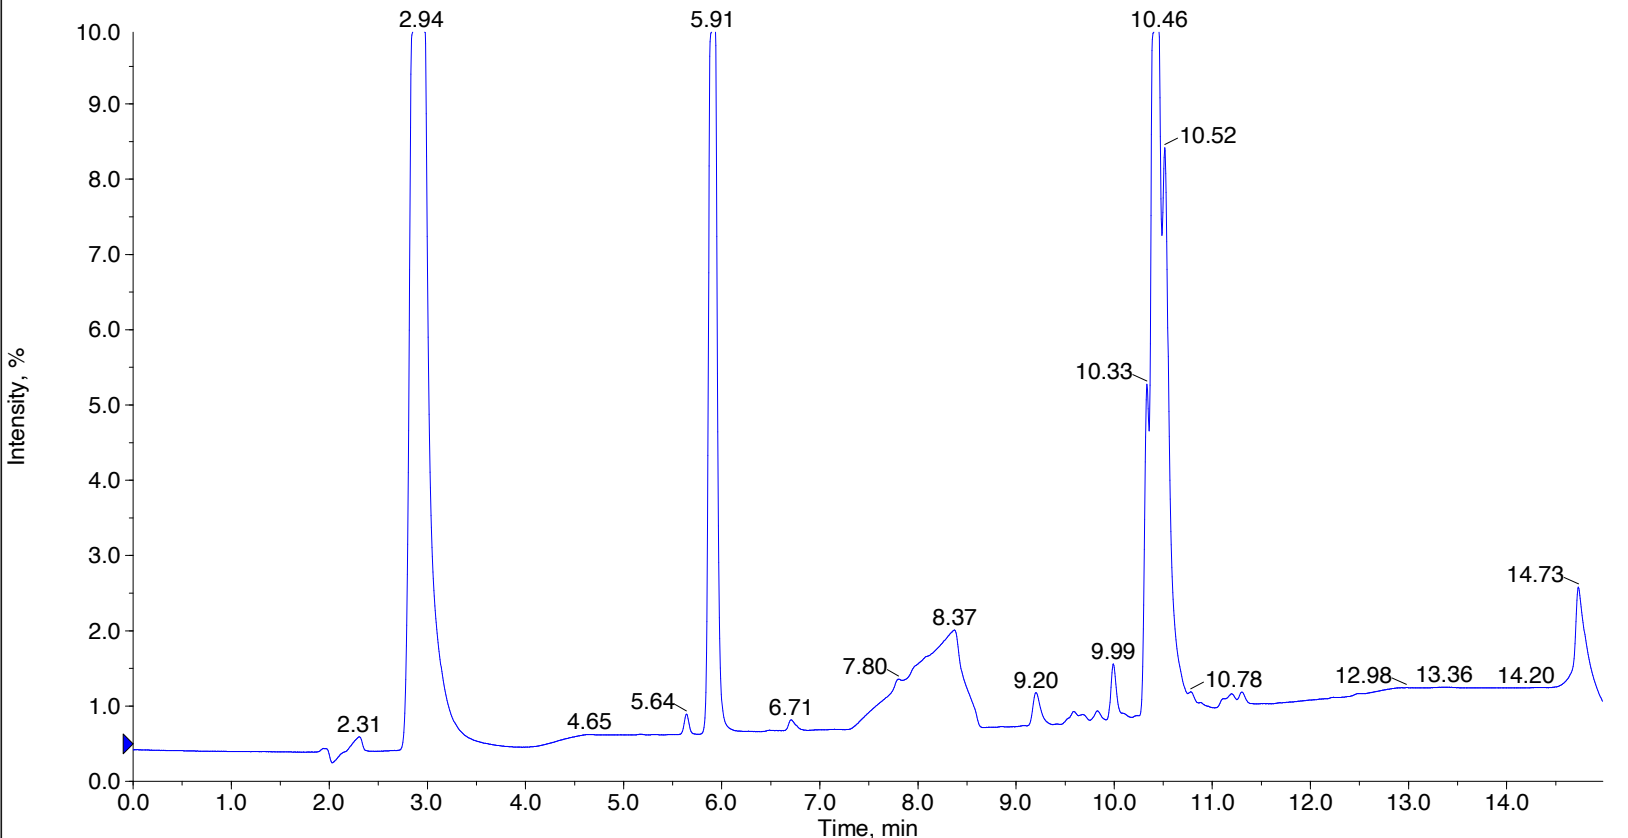

+Q1: 10.224 to 10.767 min from Sample 29 (06.10.19 EY-6-43 F28) of Euna 2019 Jun.wiff (Turbo Spra... Max. 3.4e6 cps

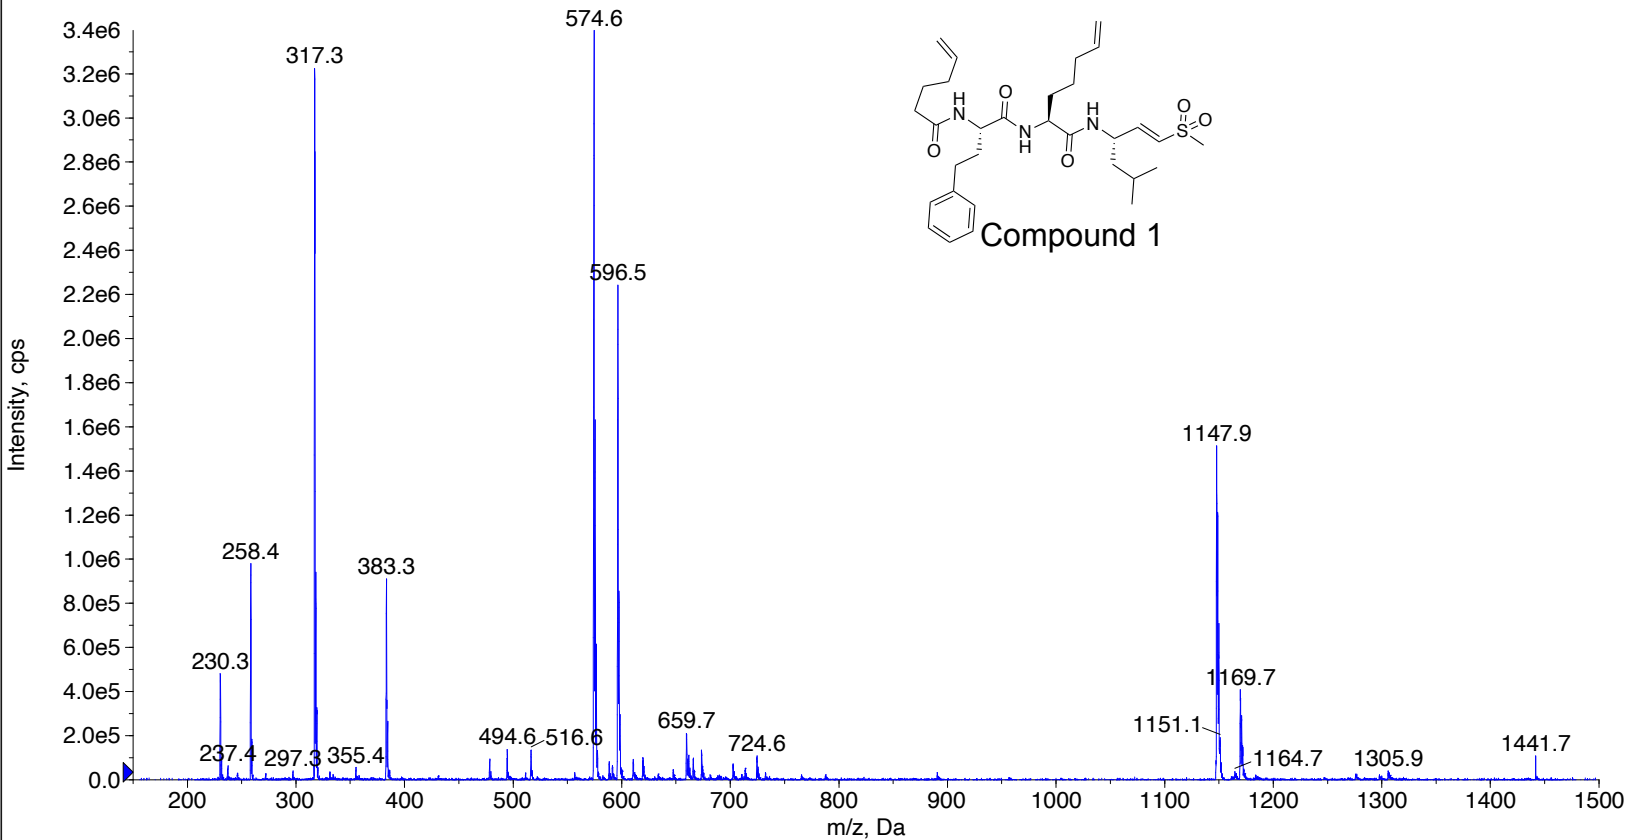

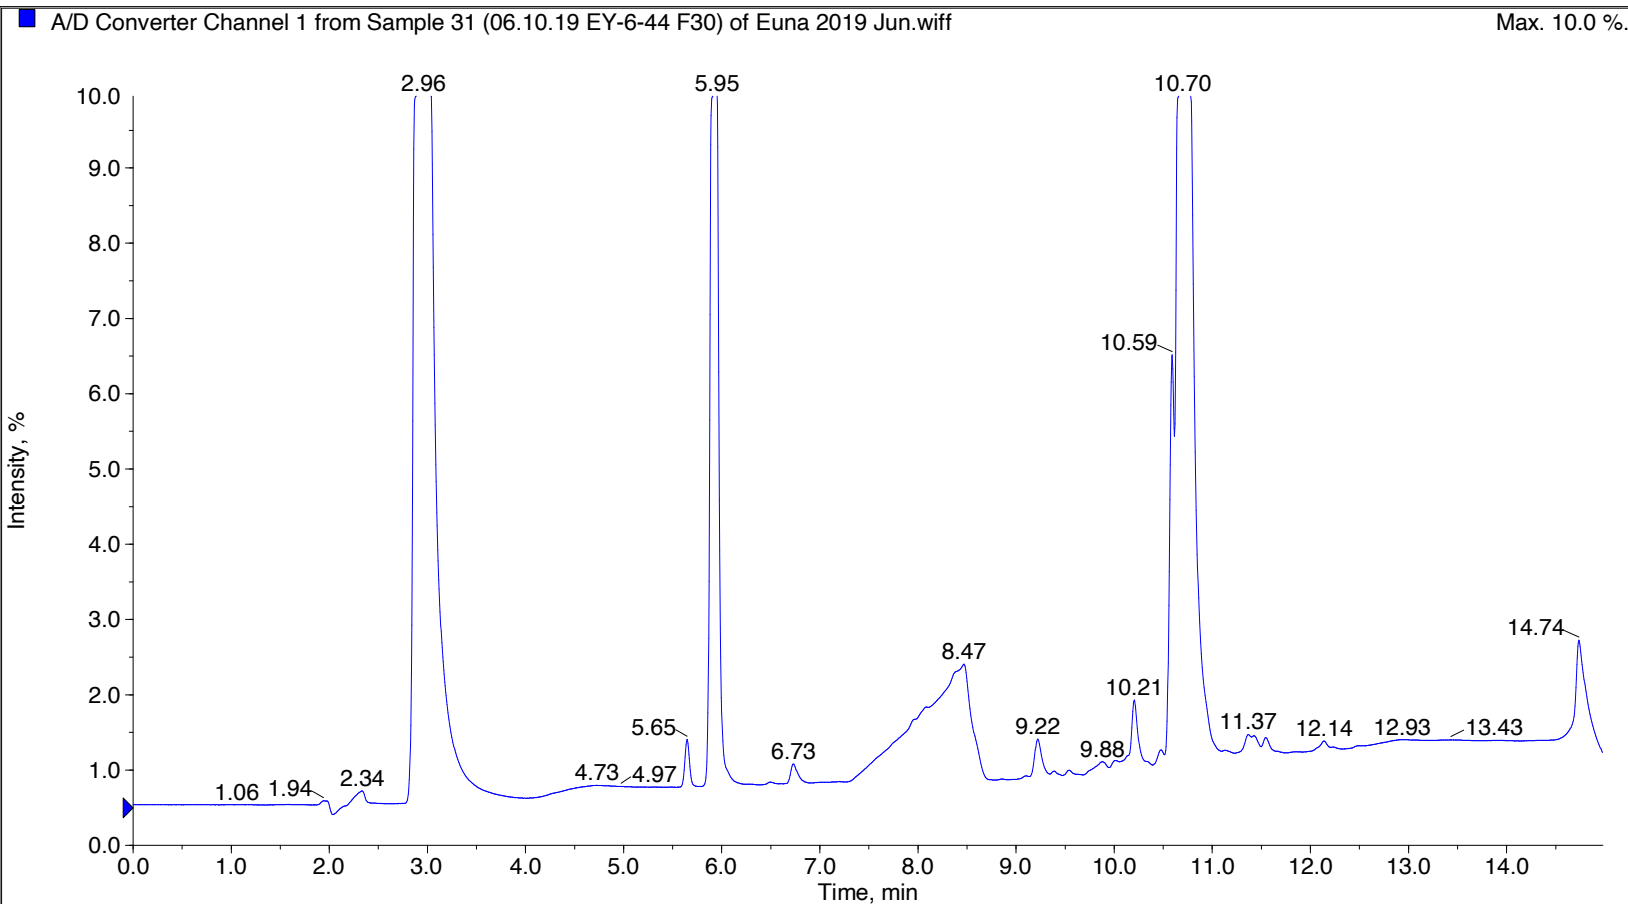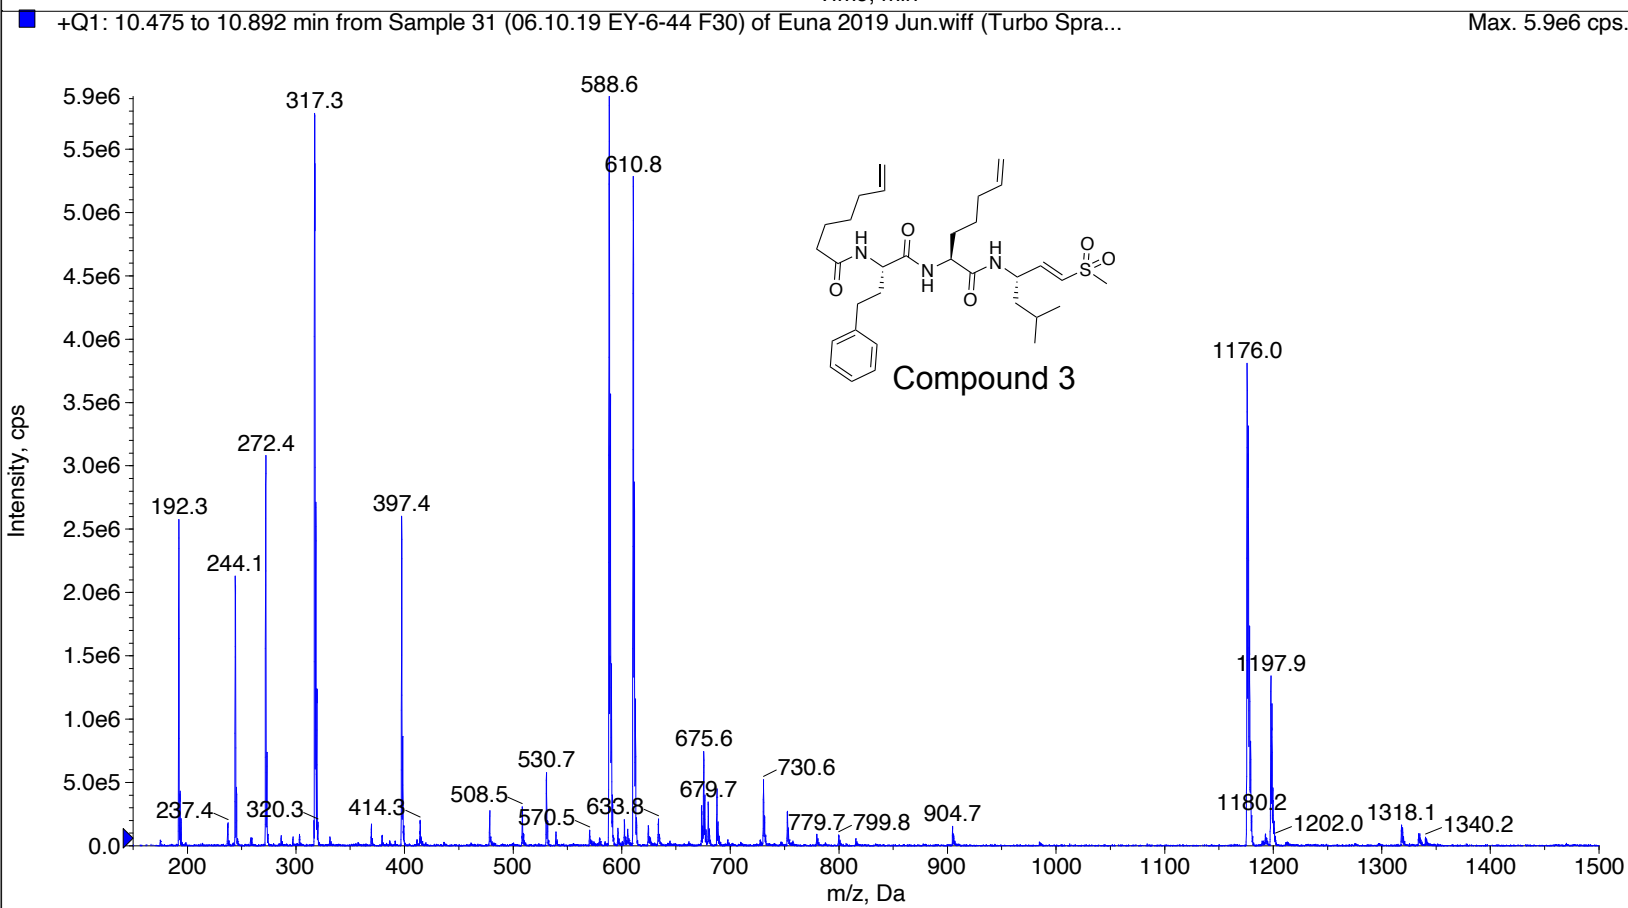

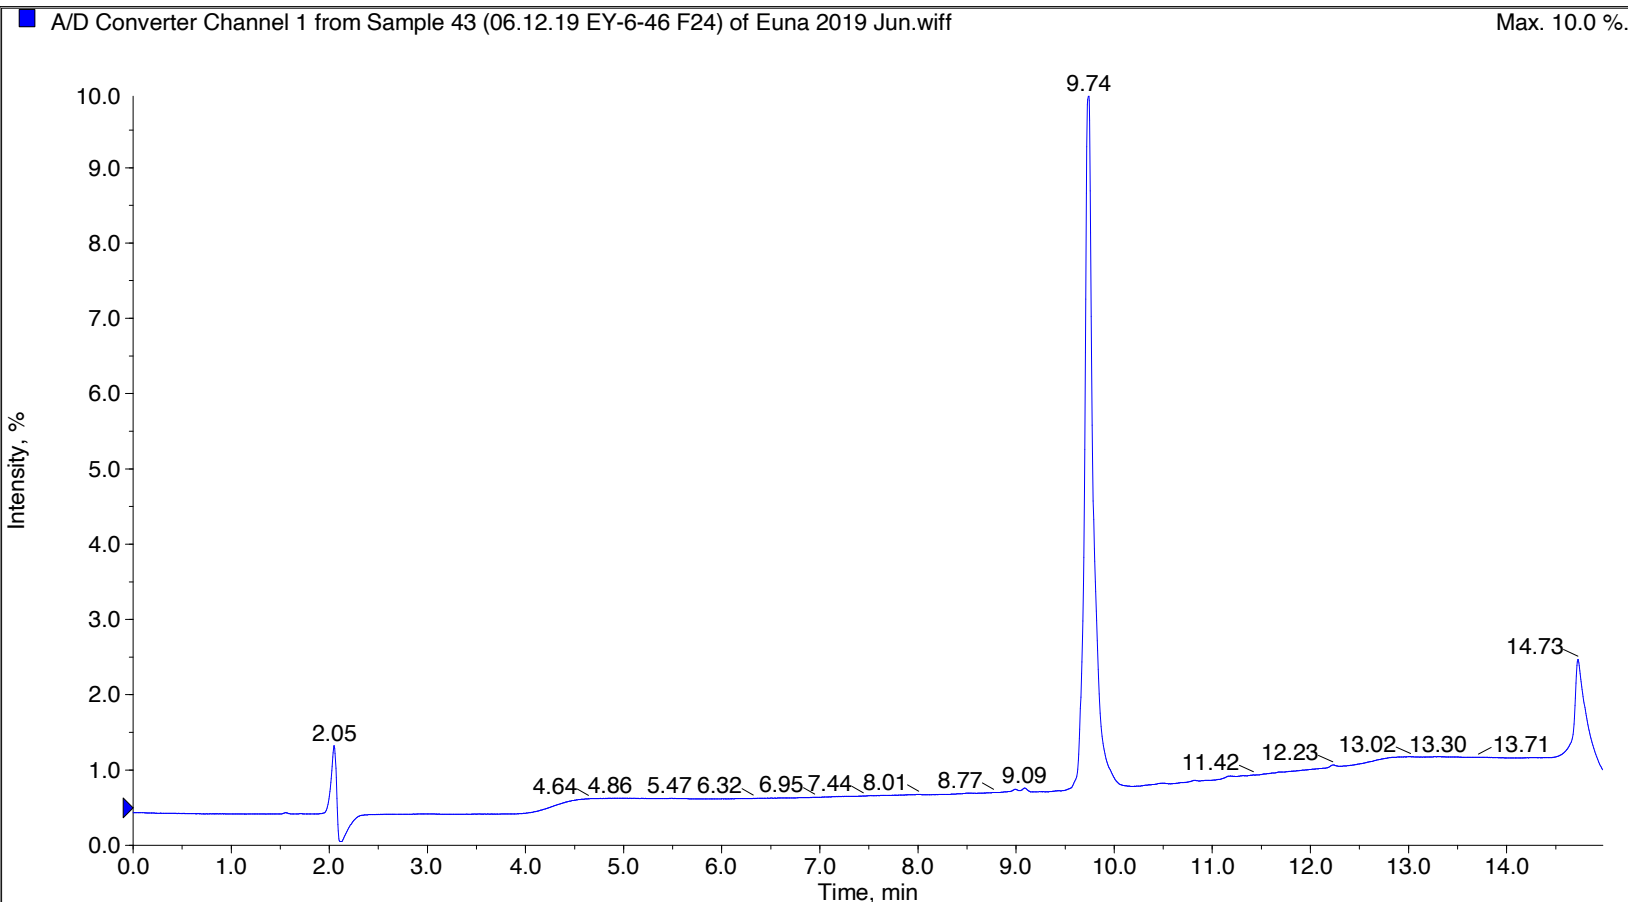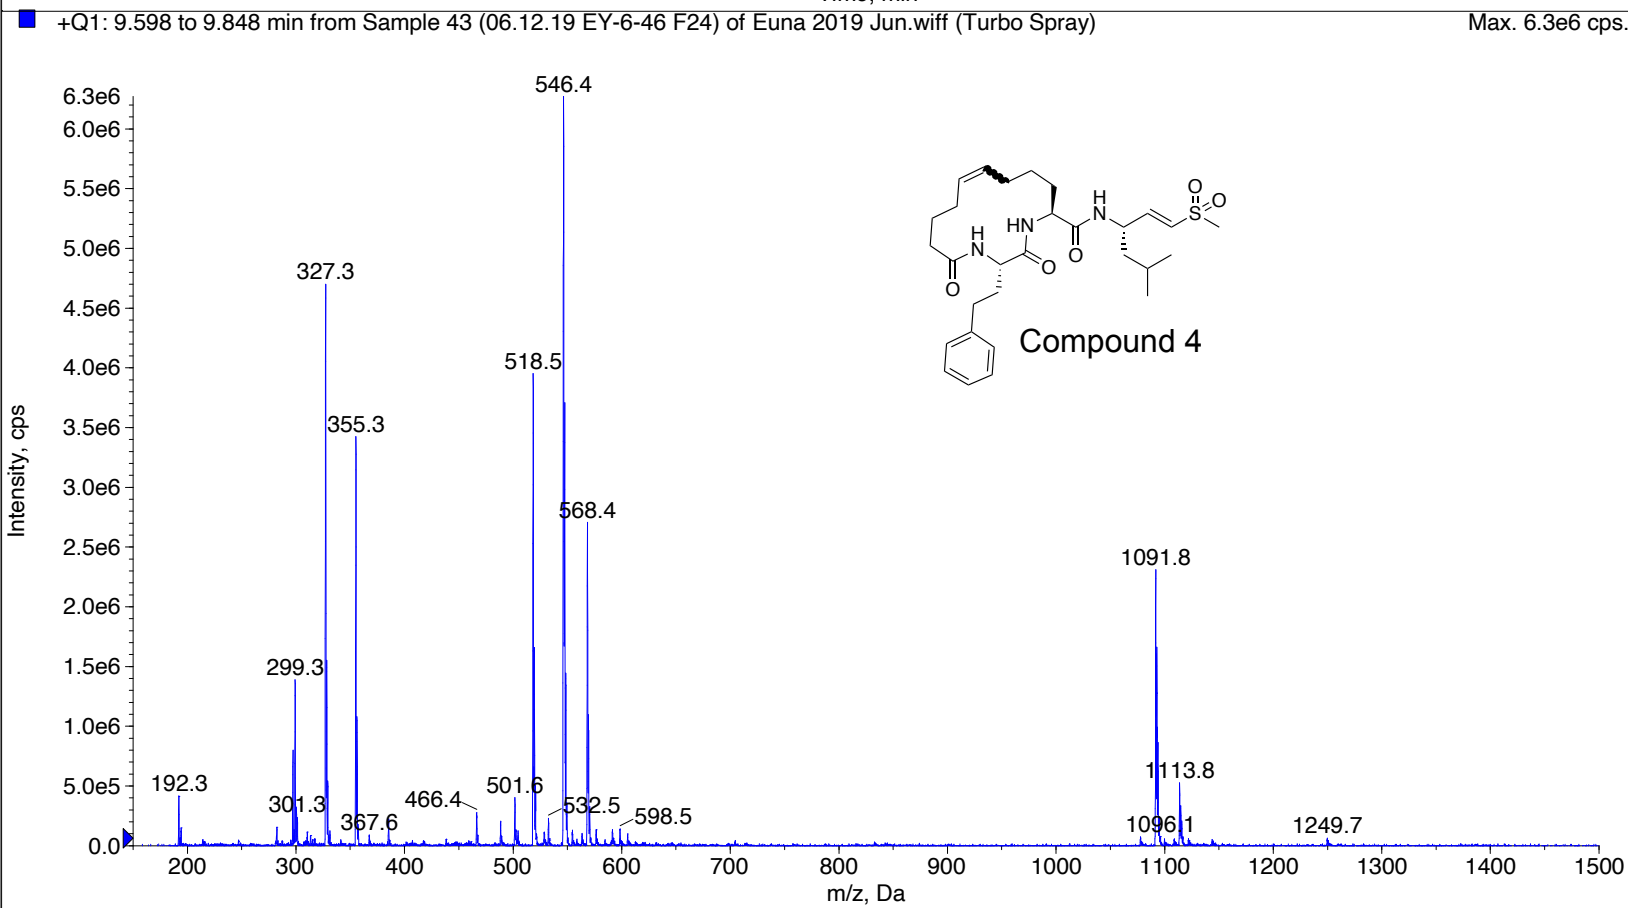

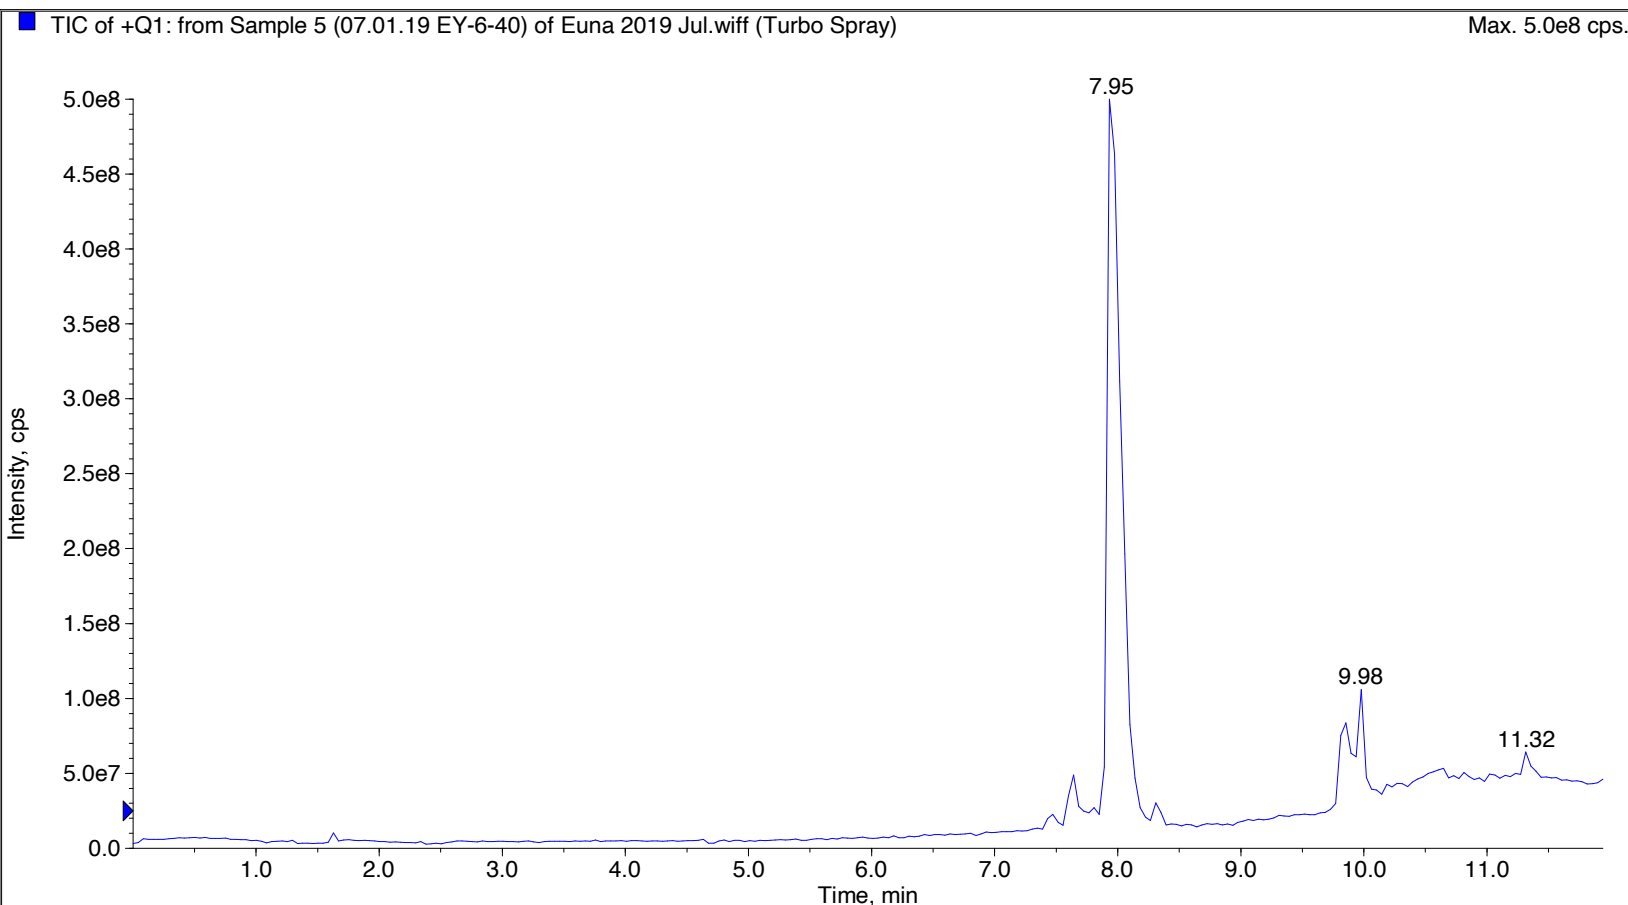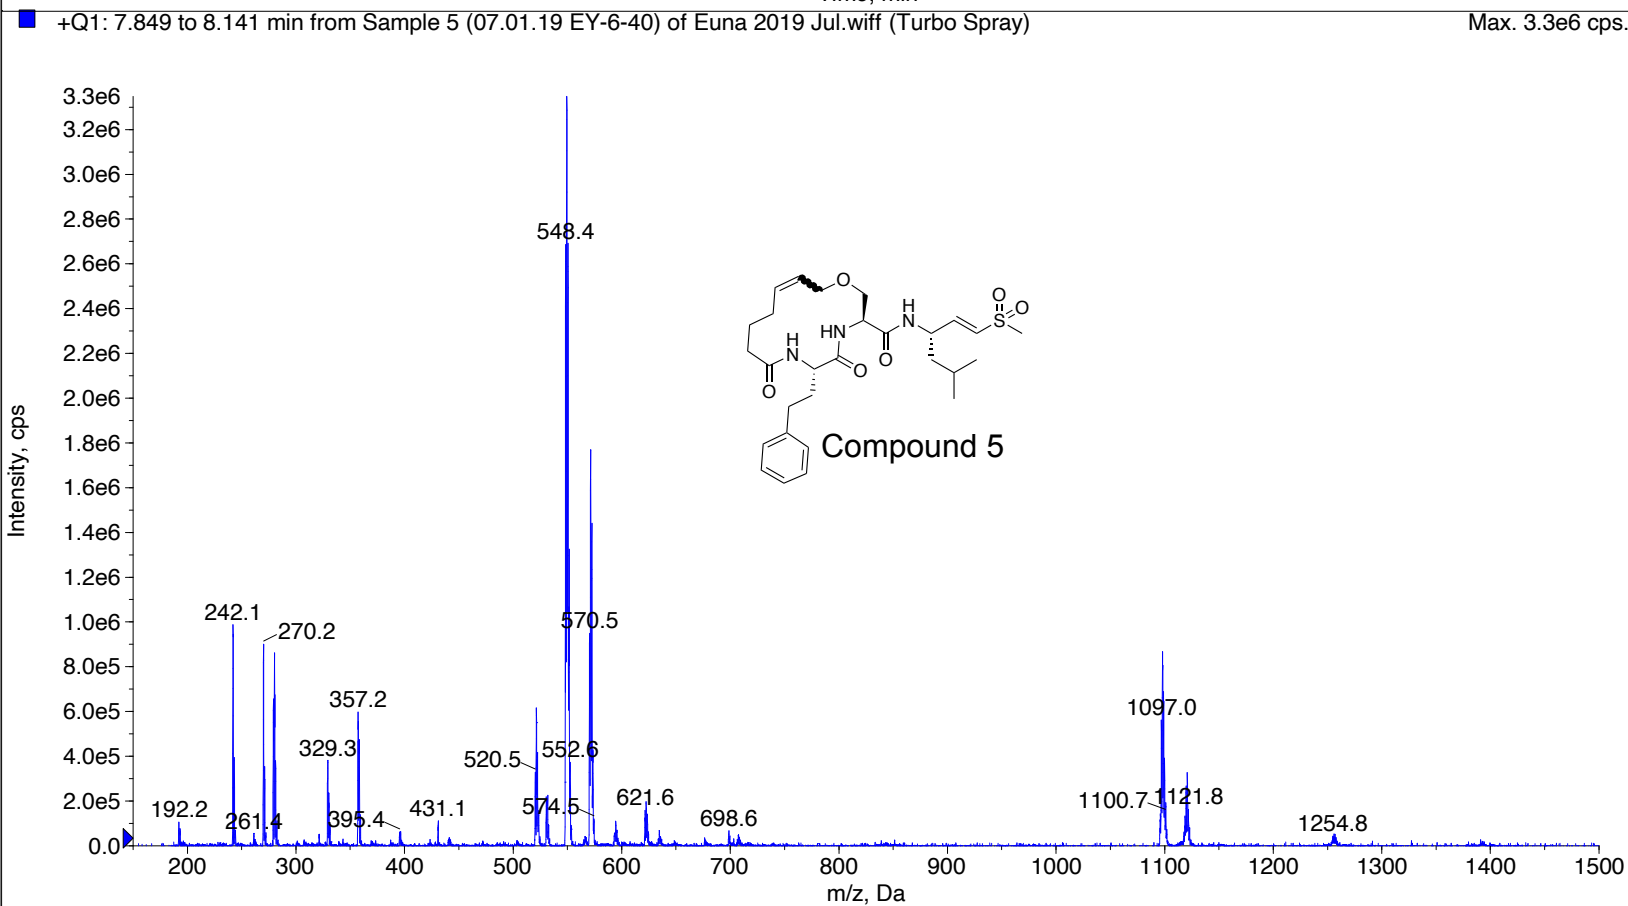

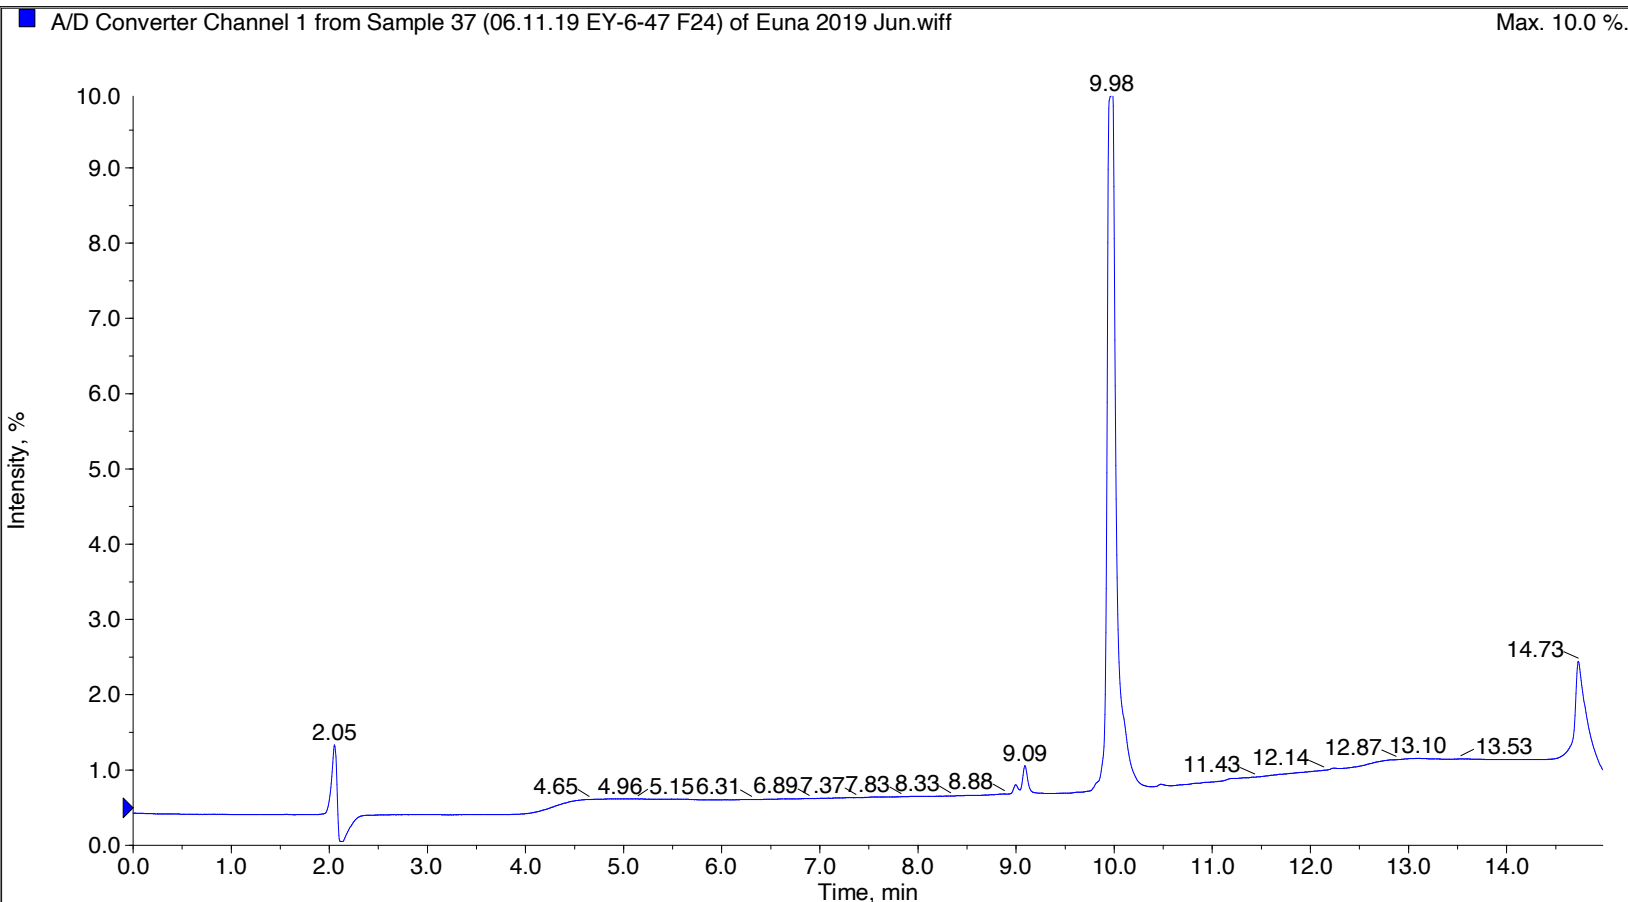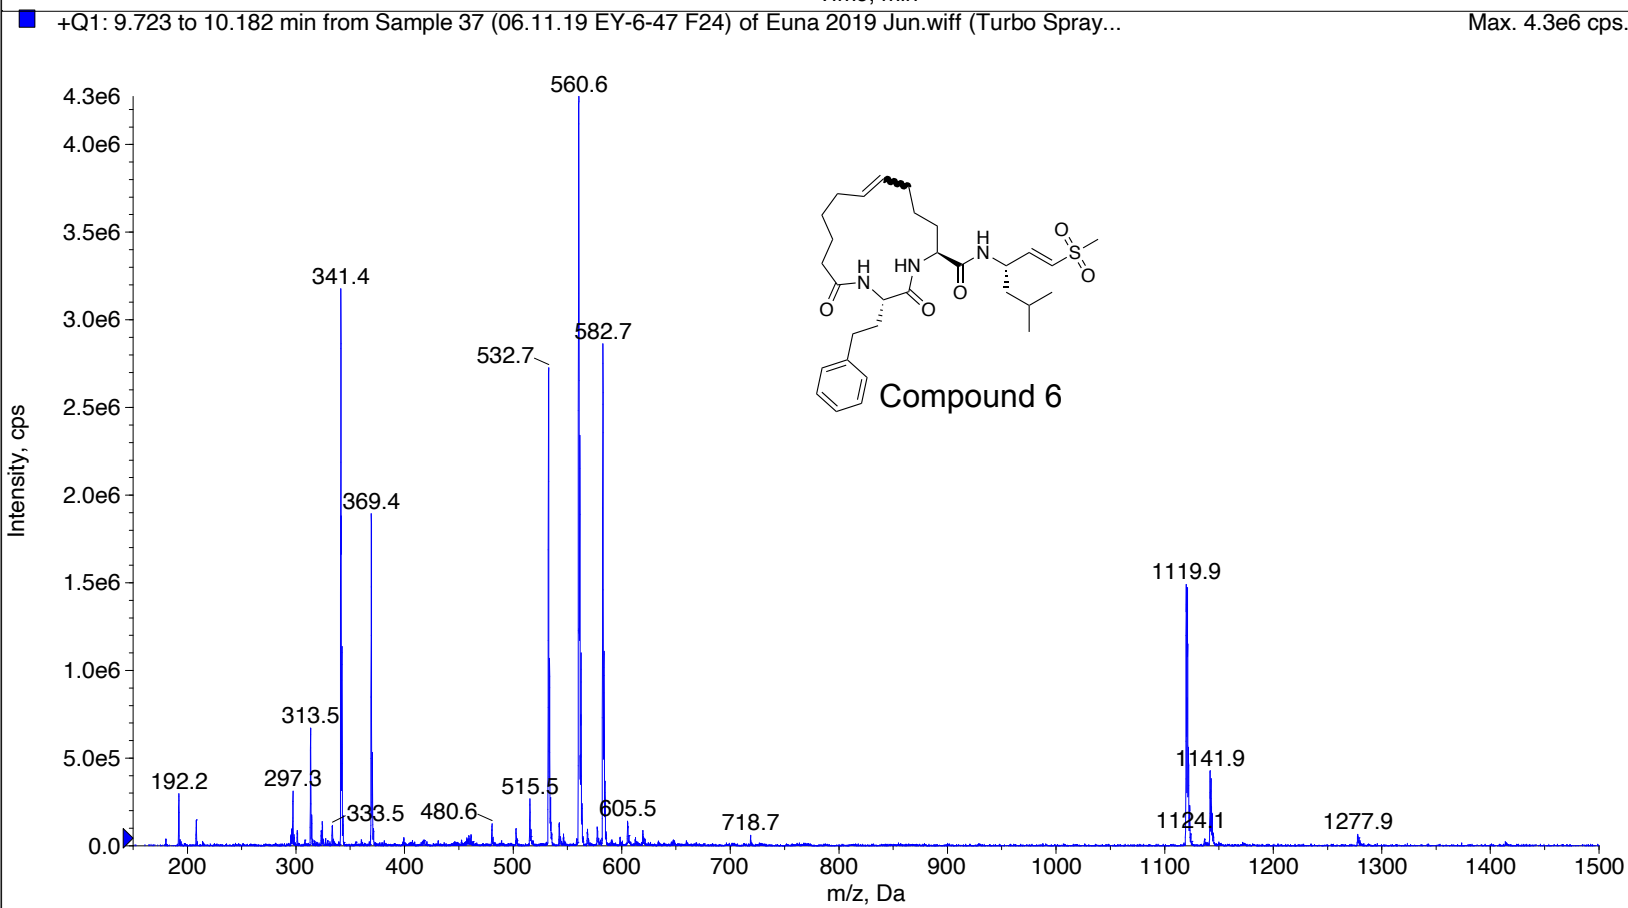

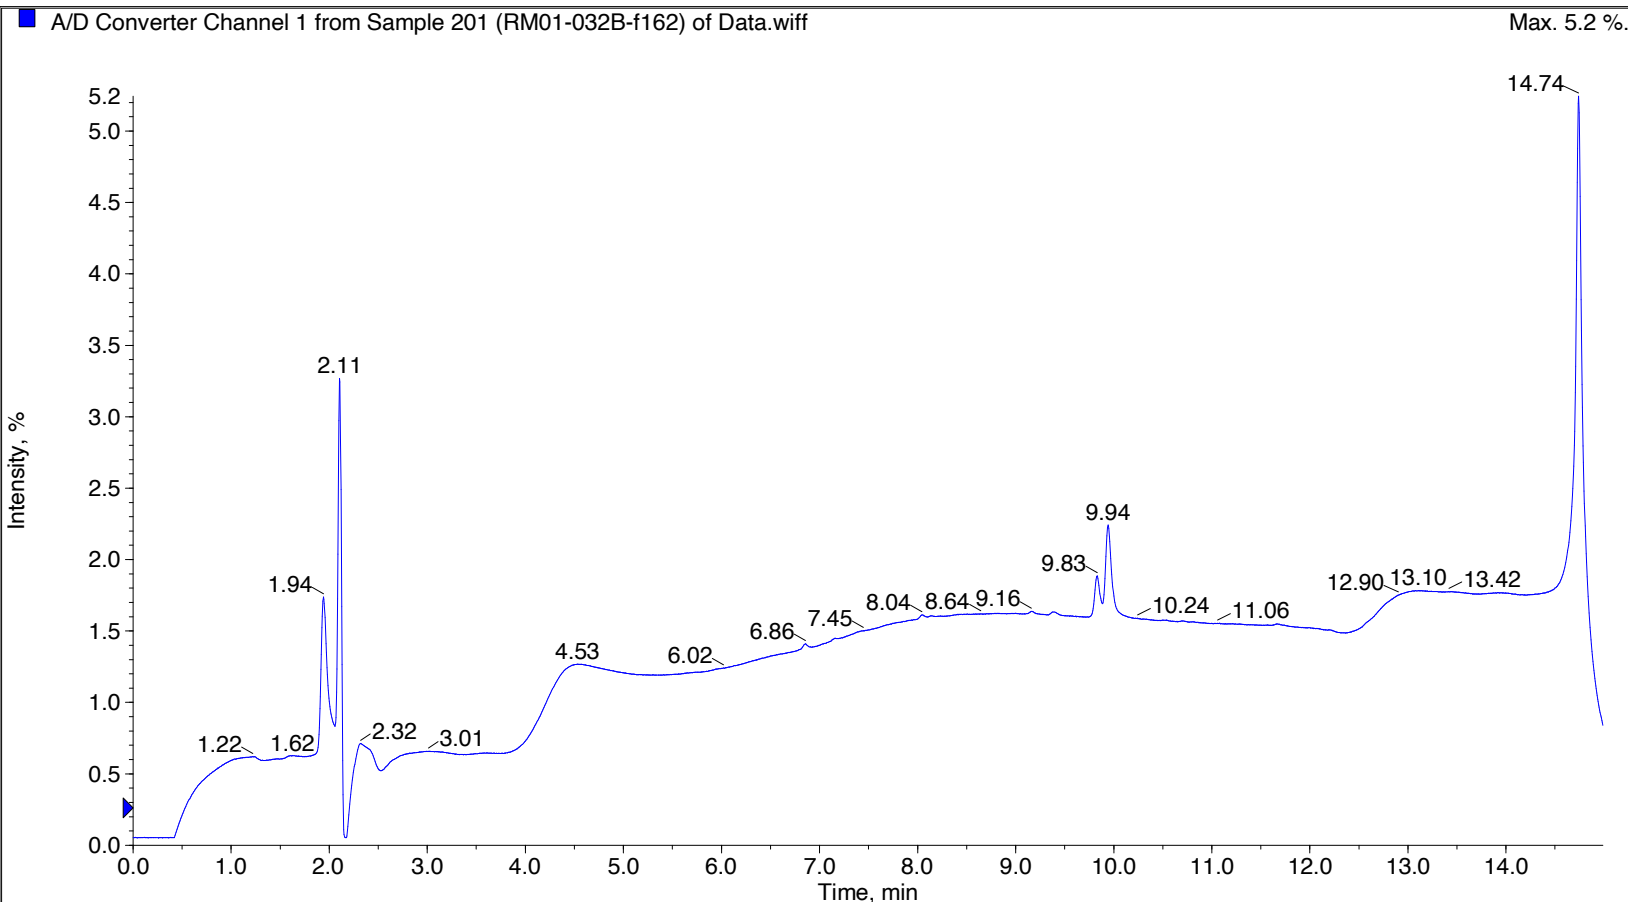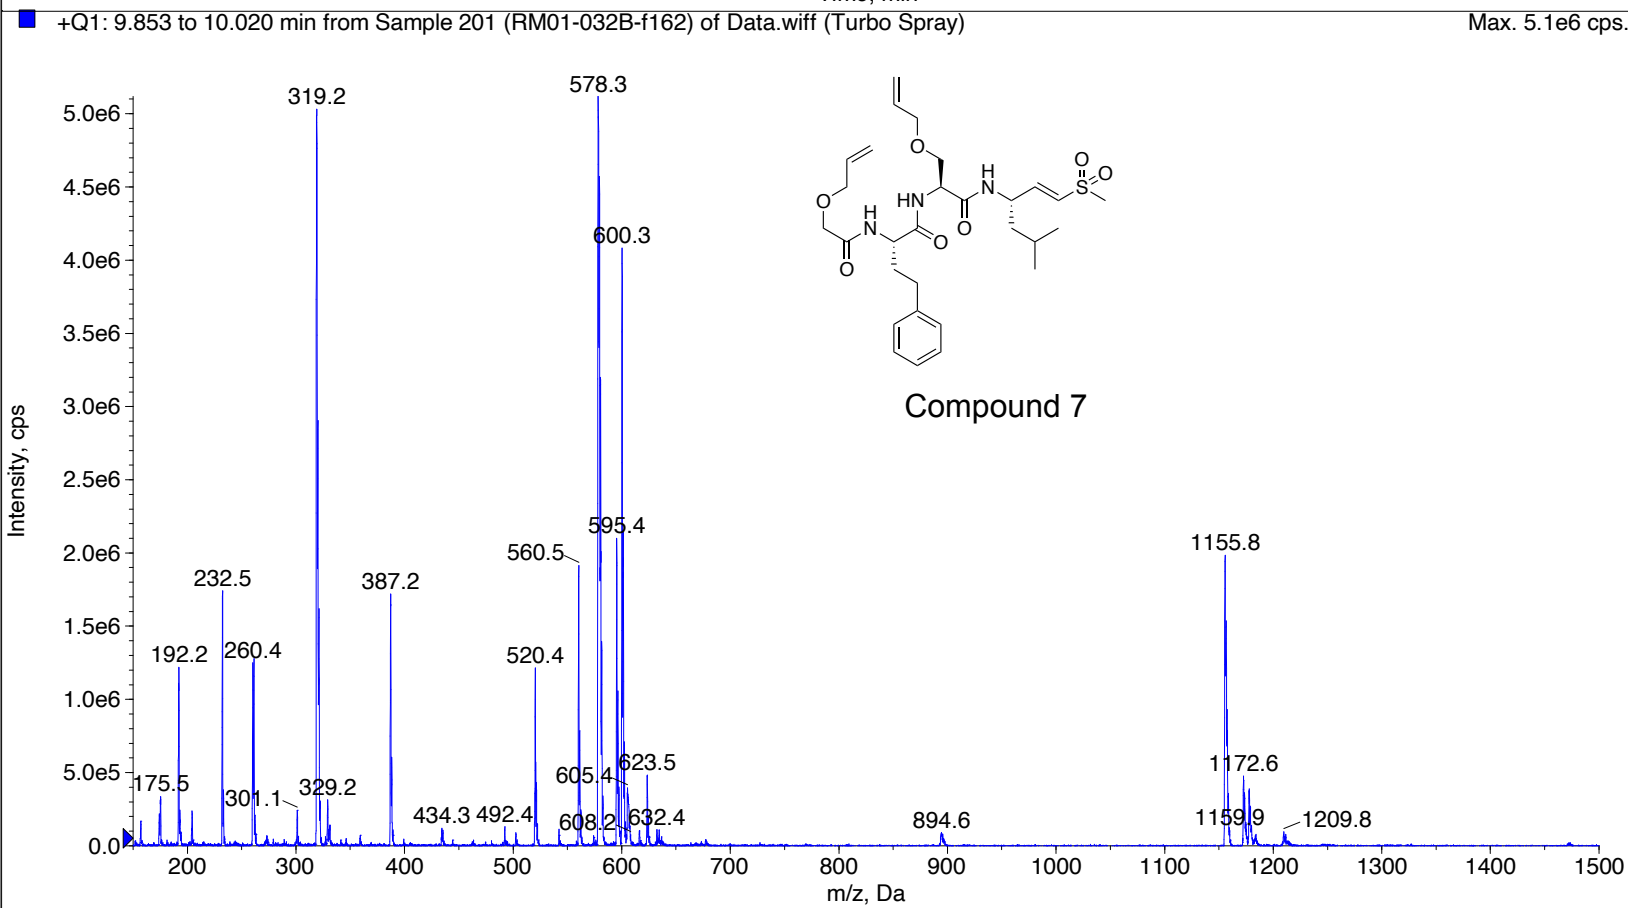

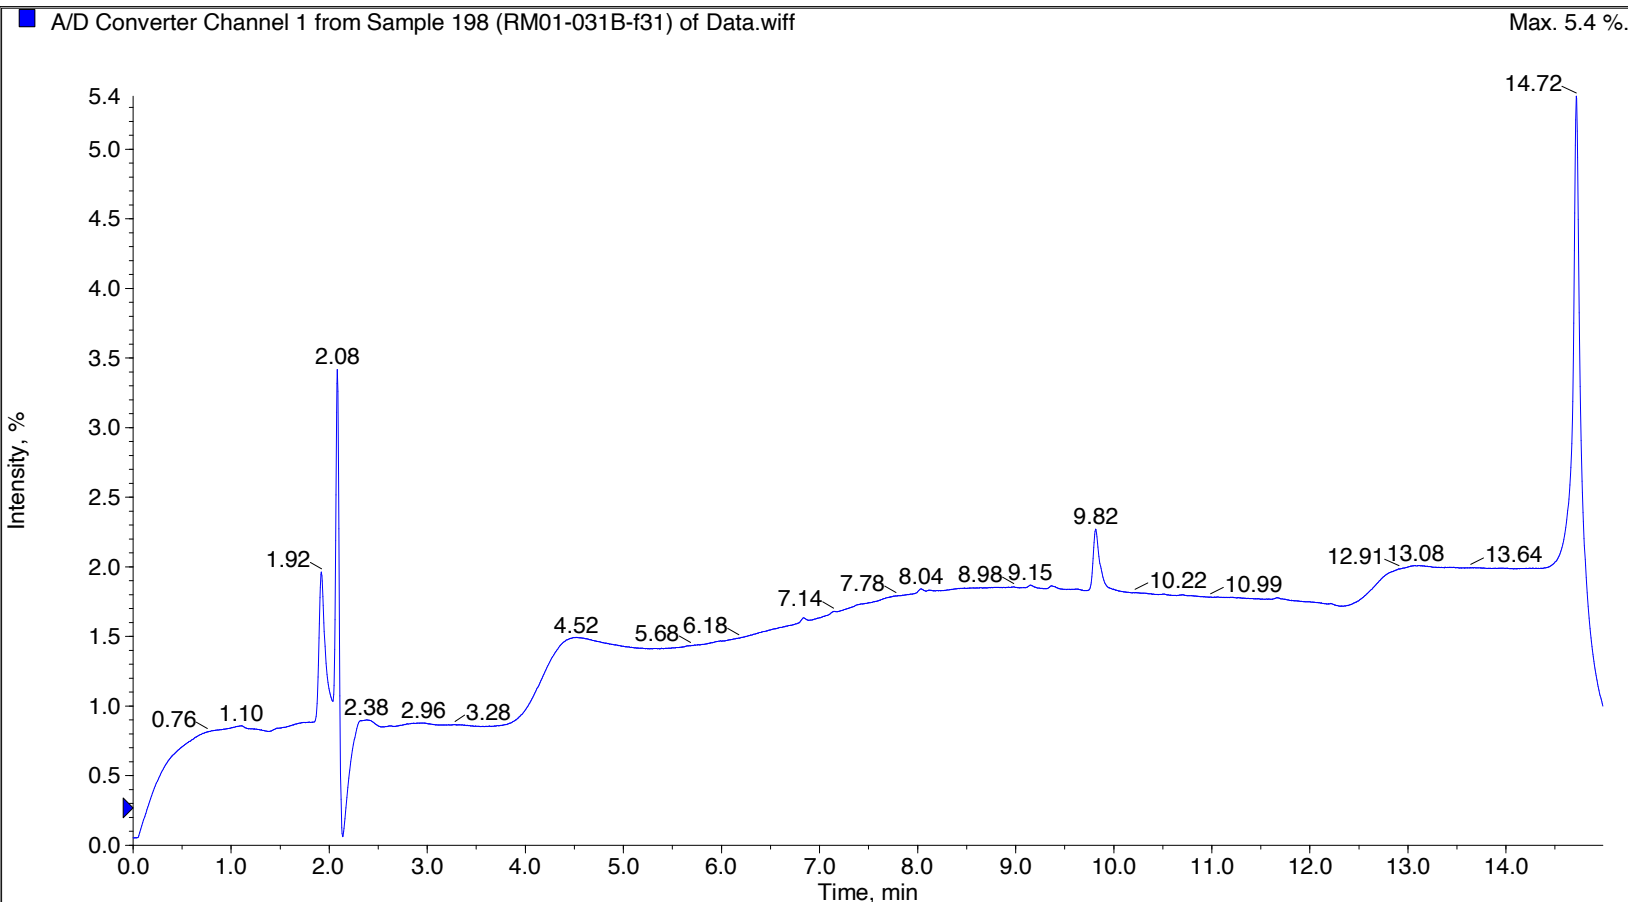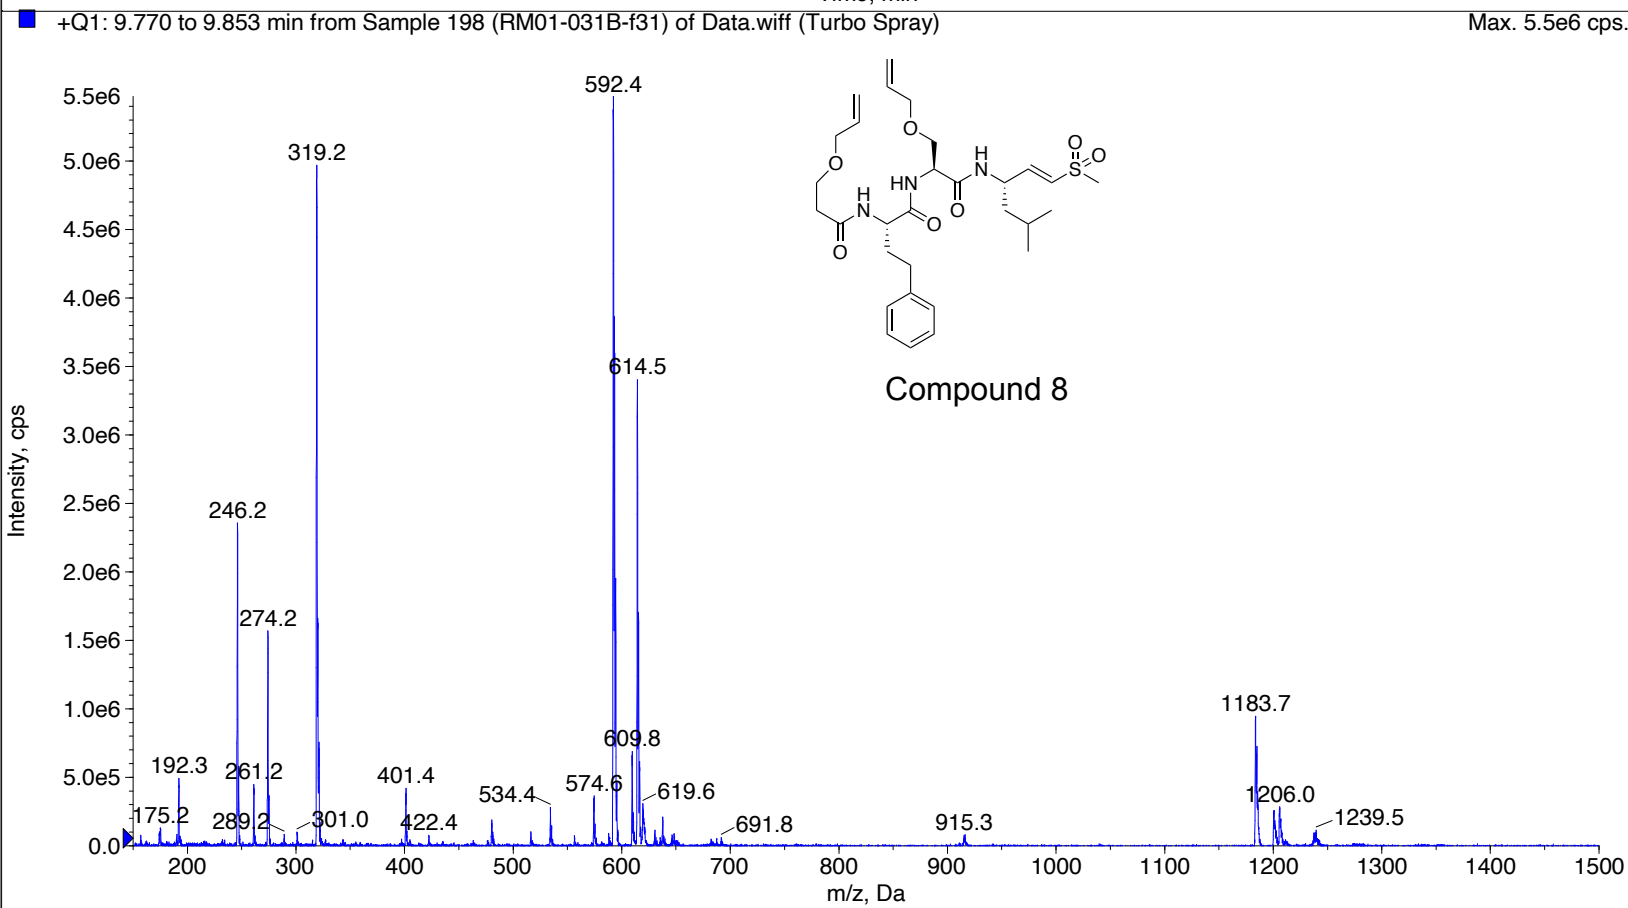

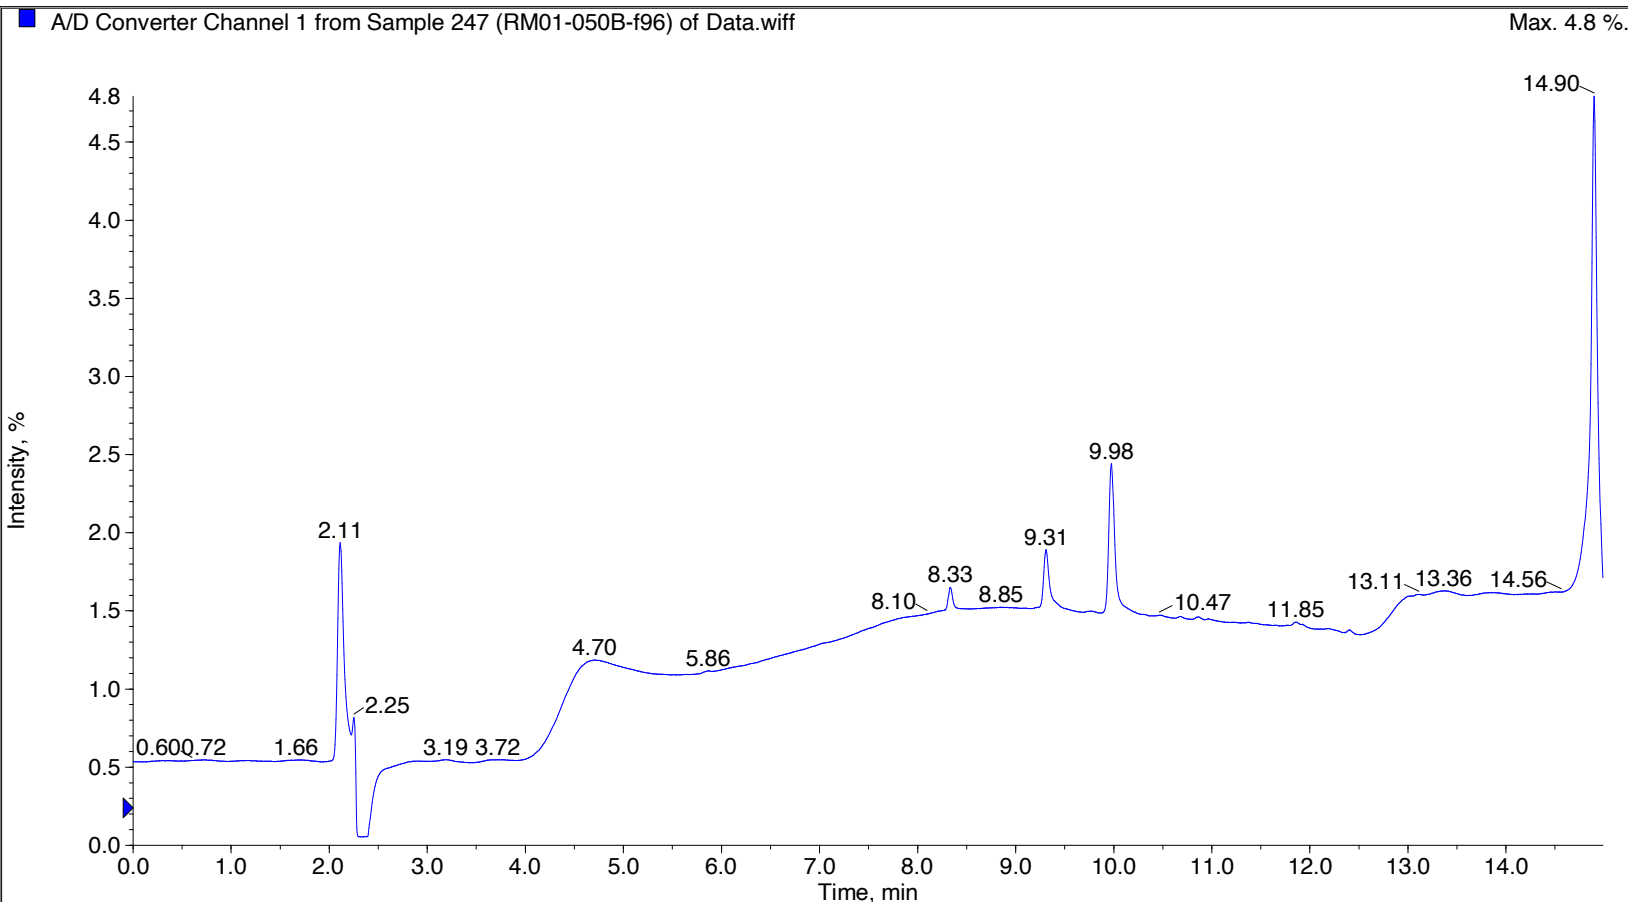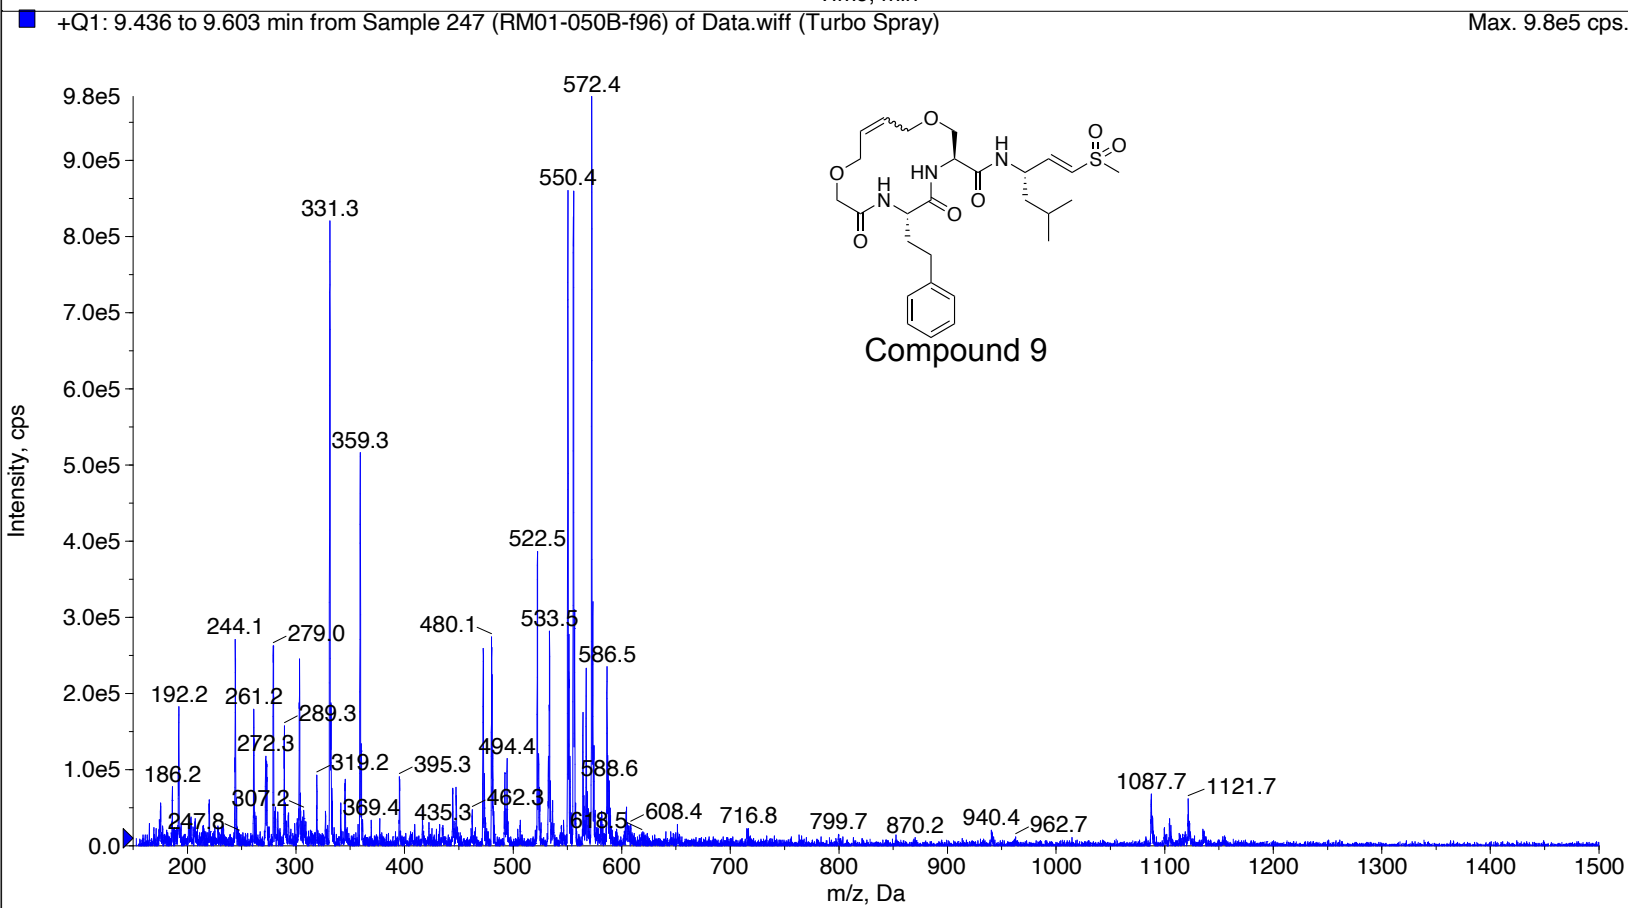



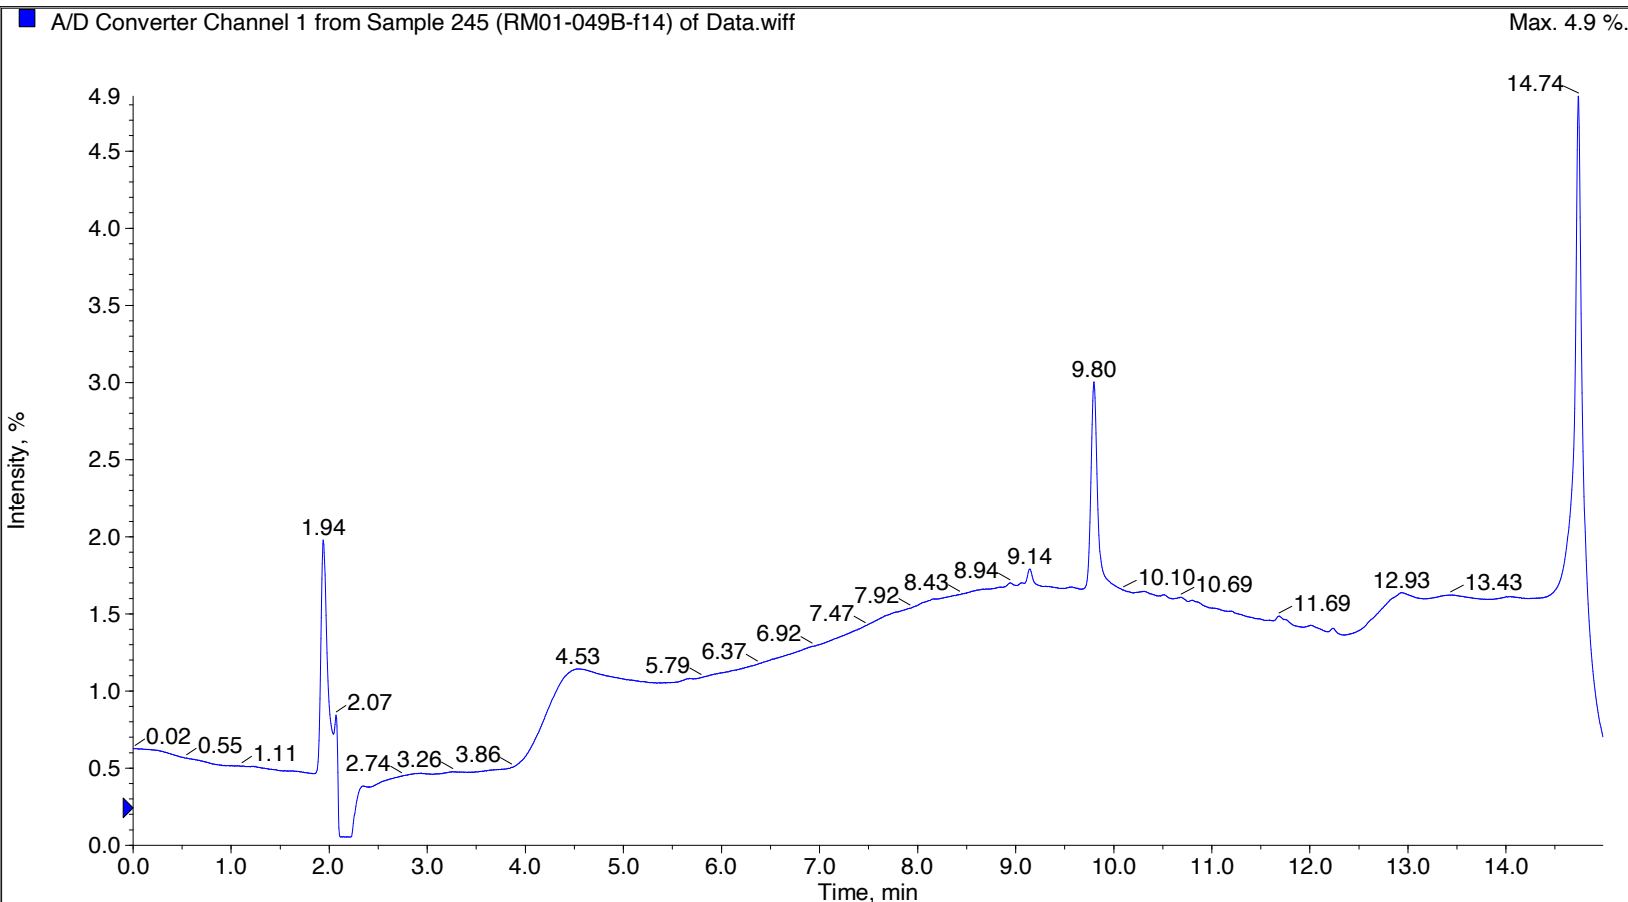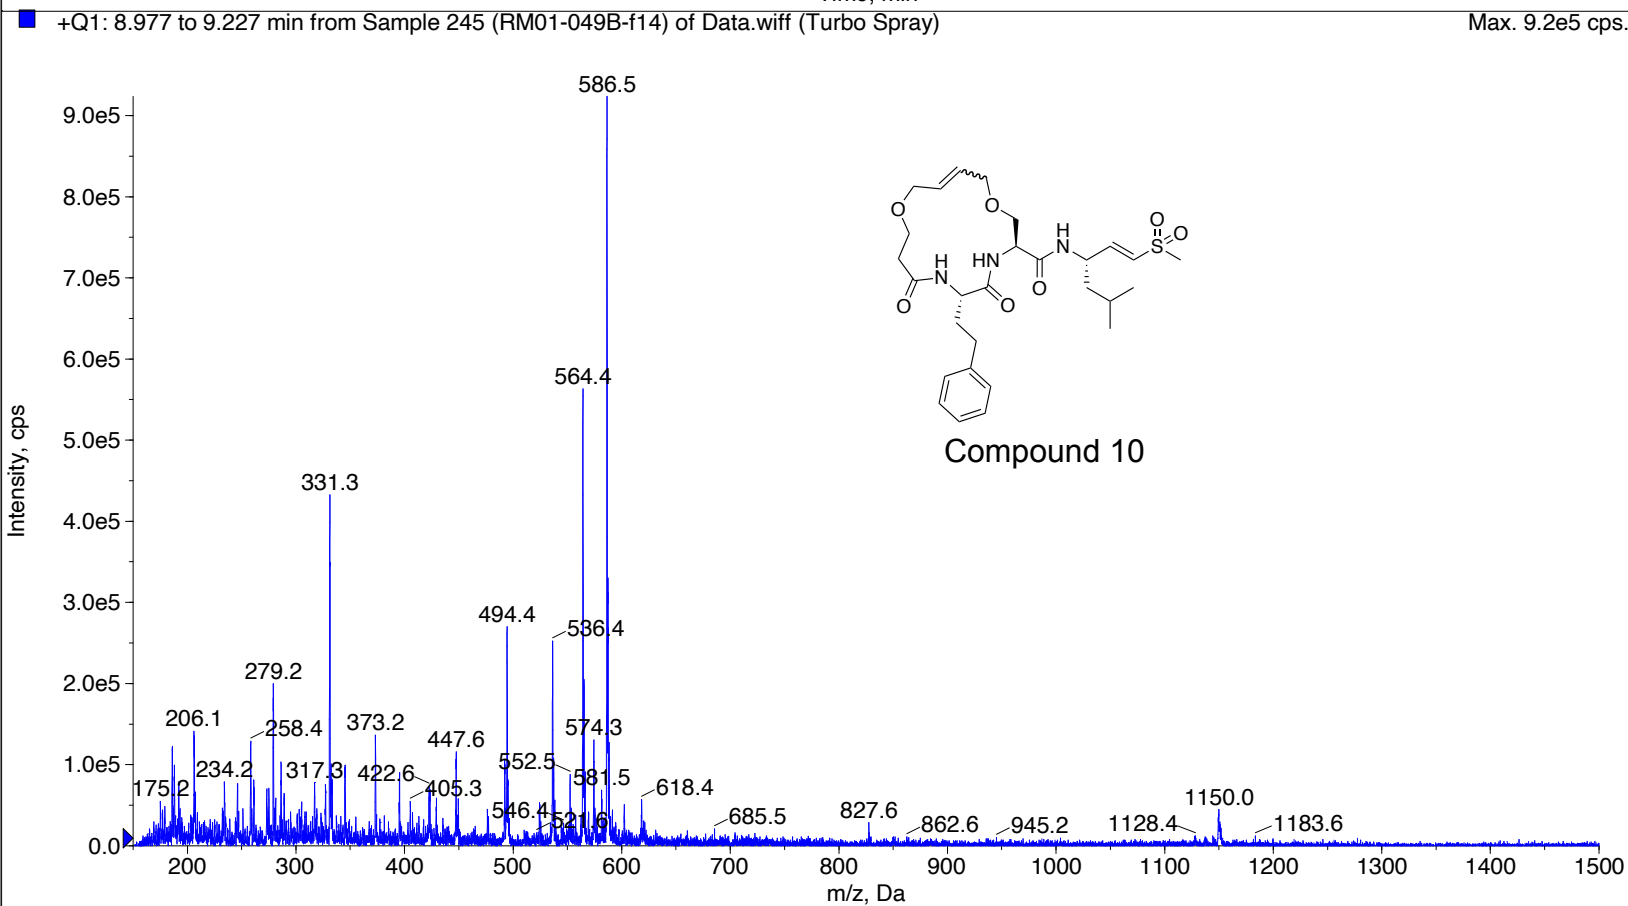

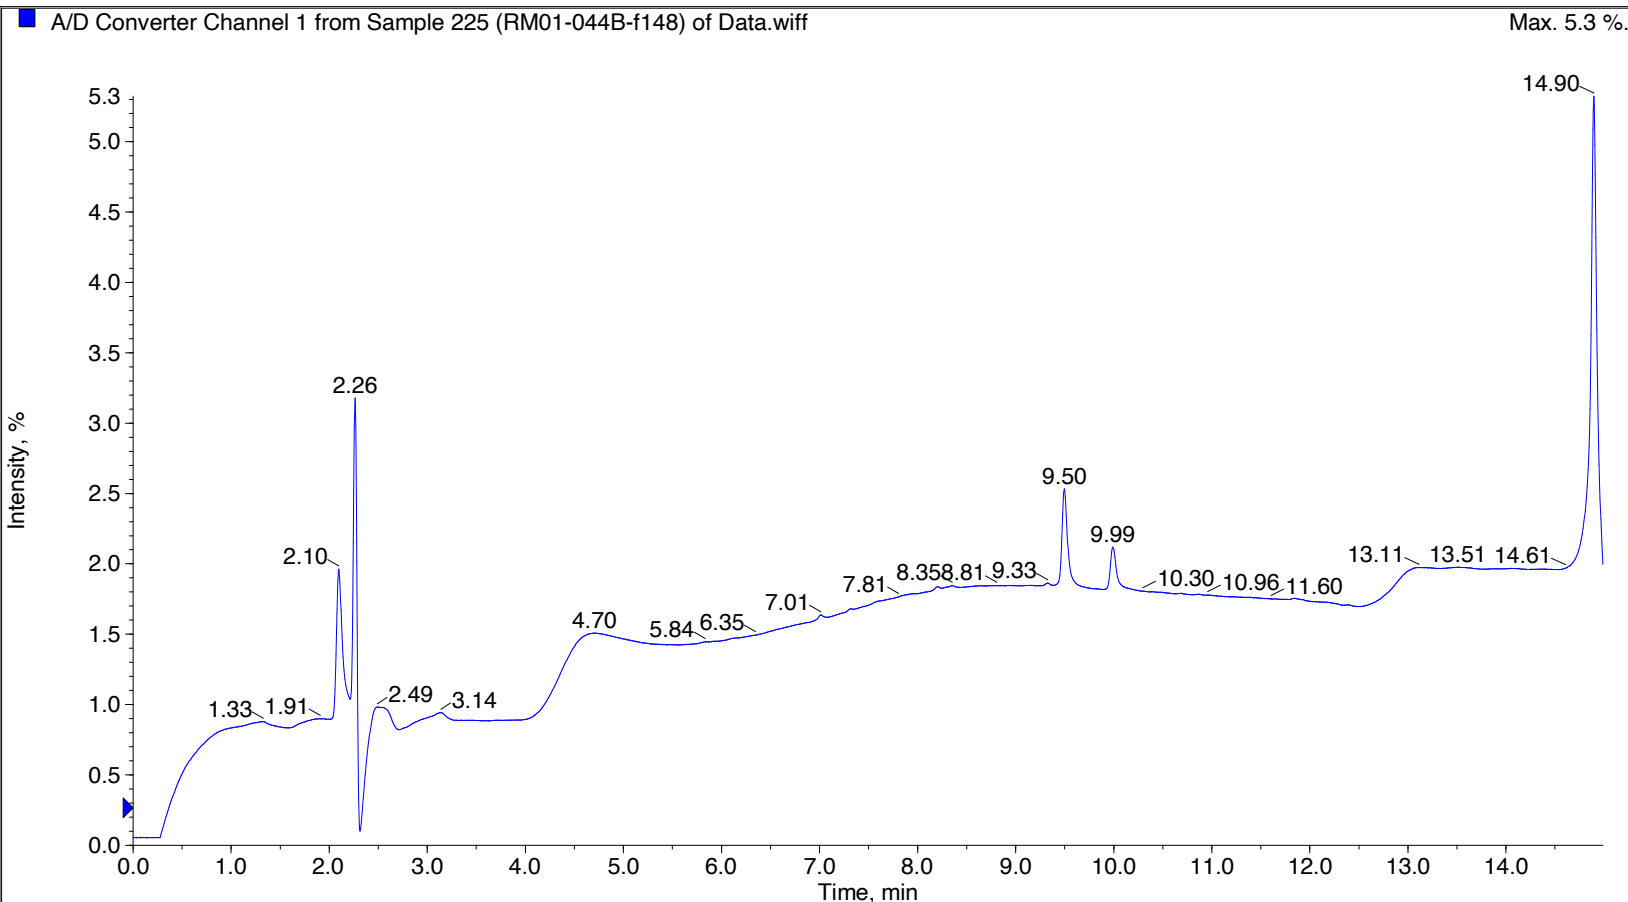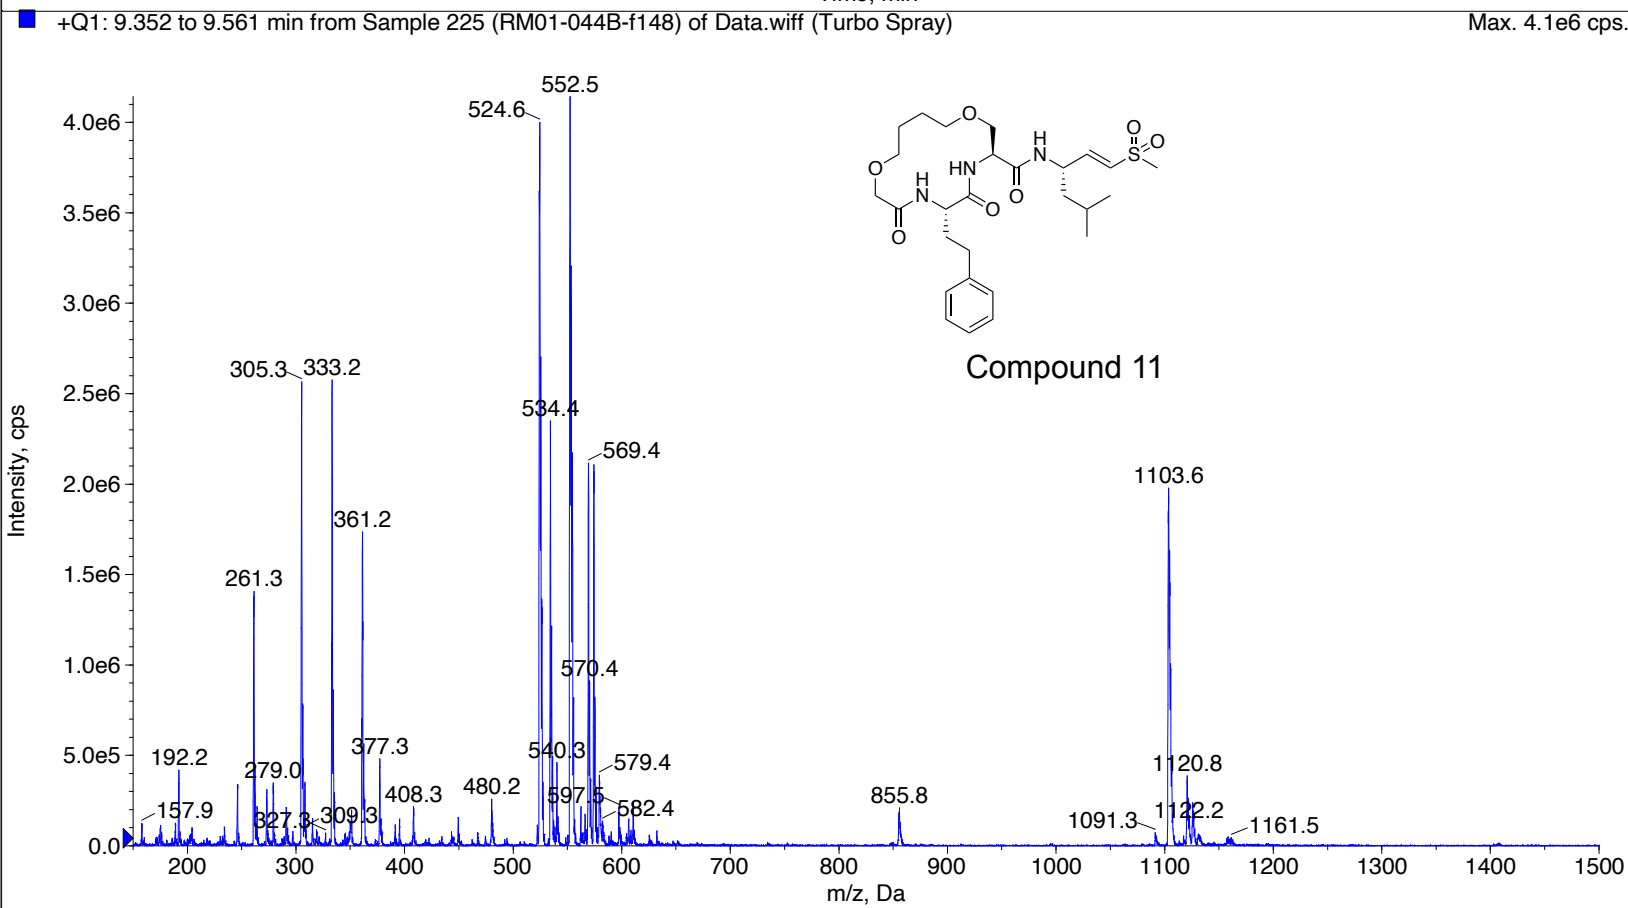

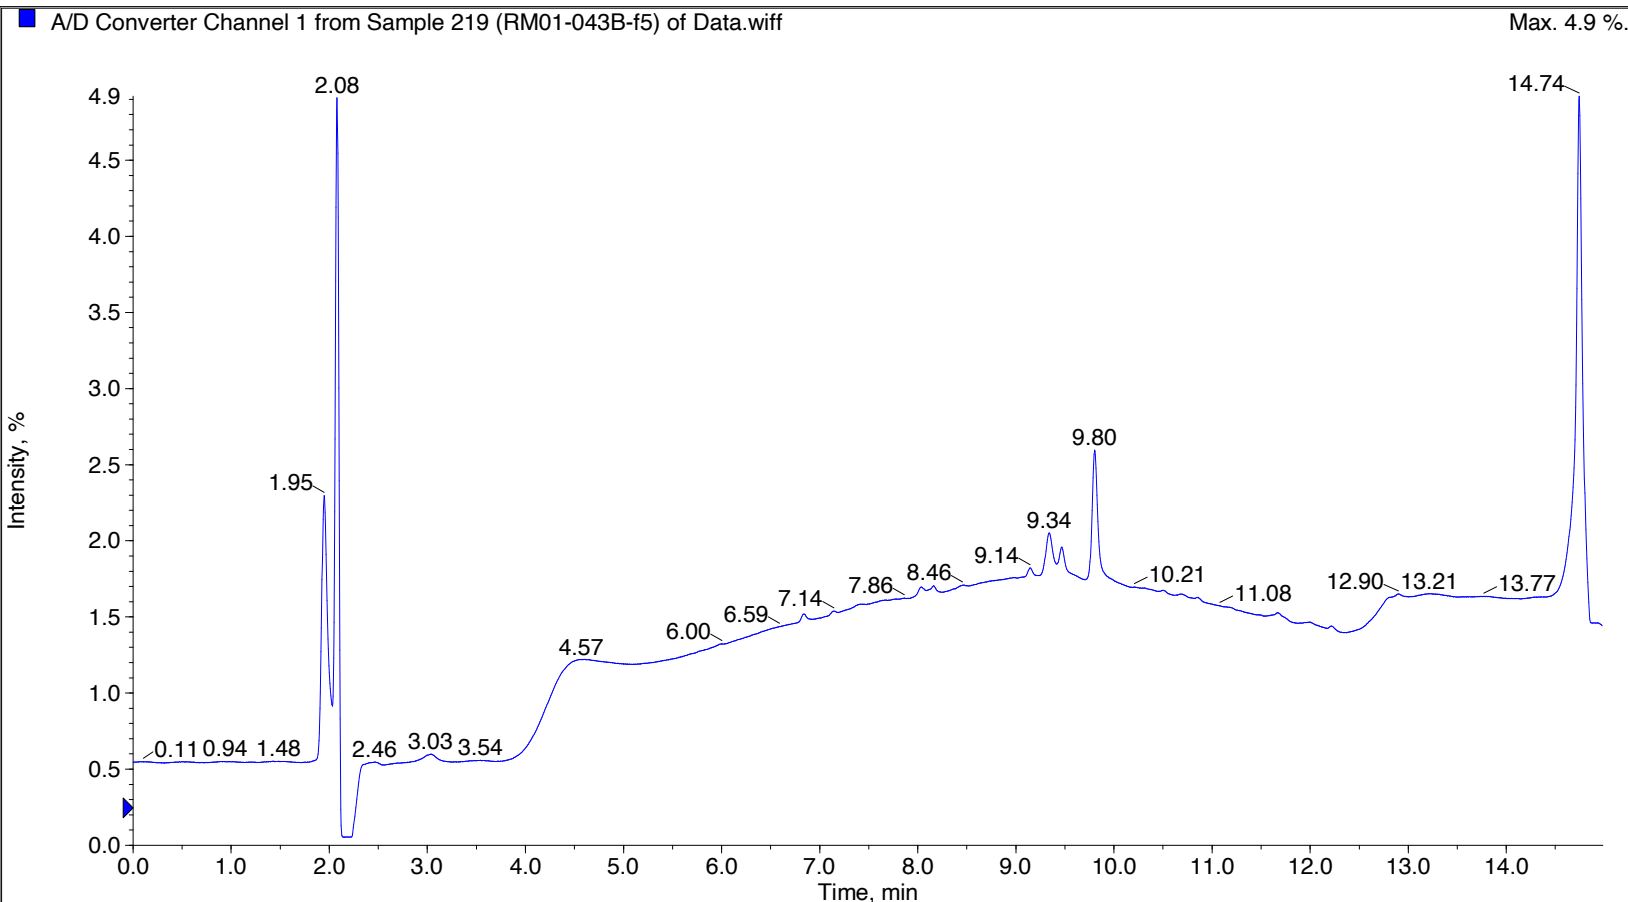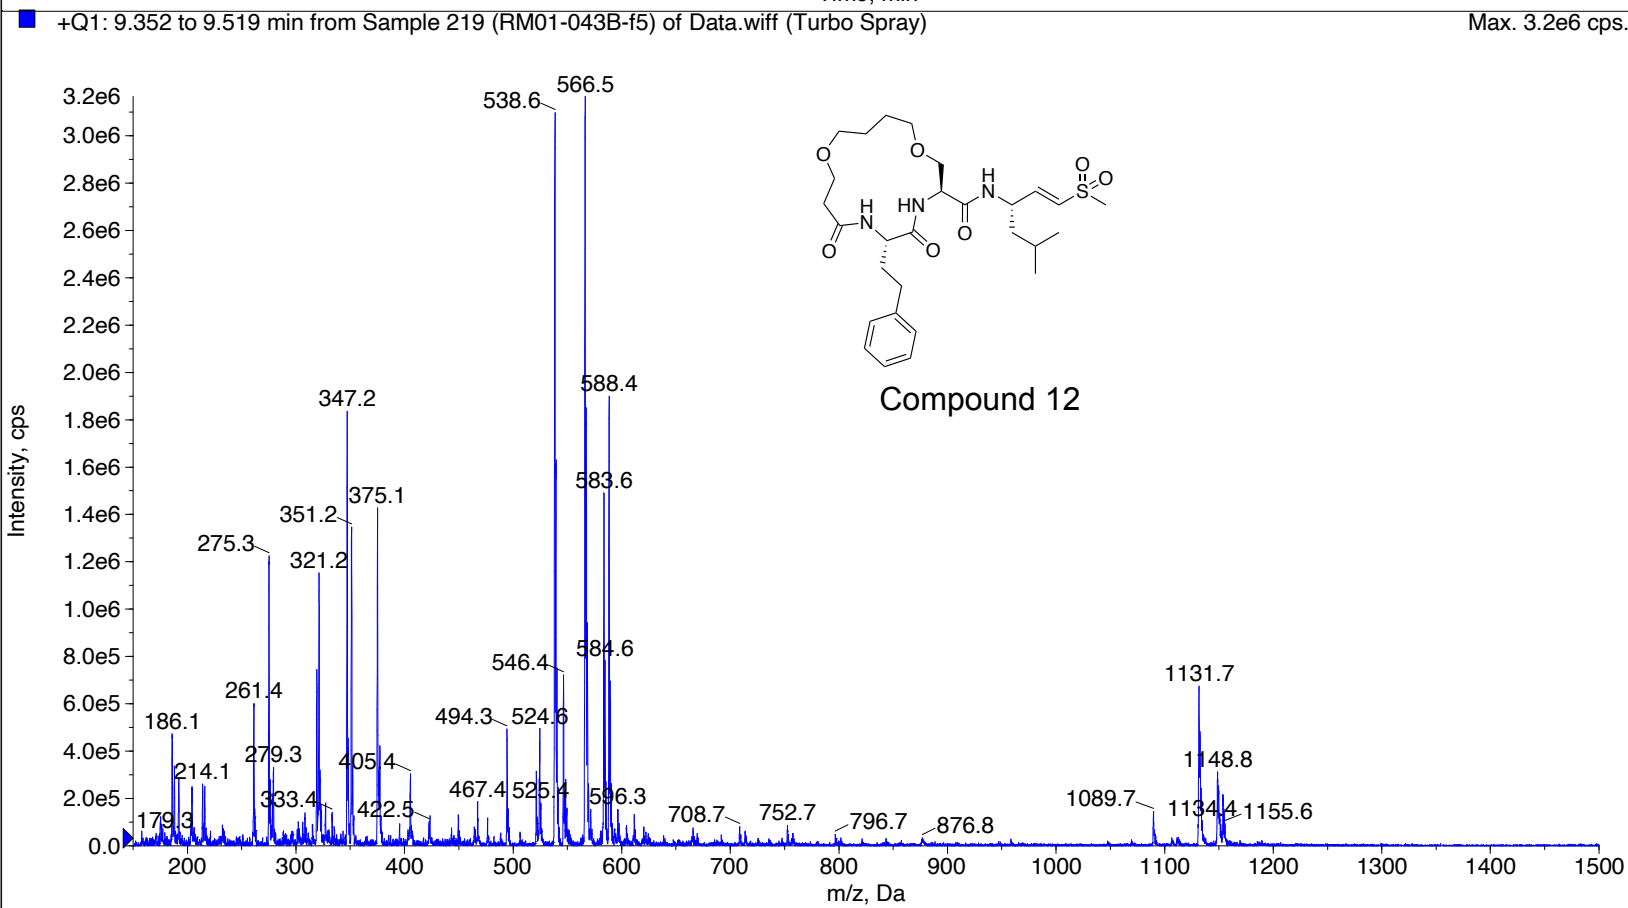

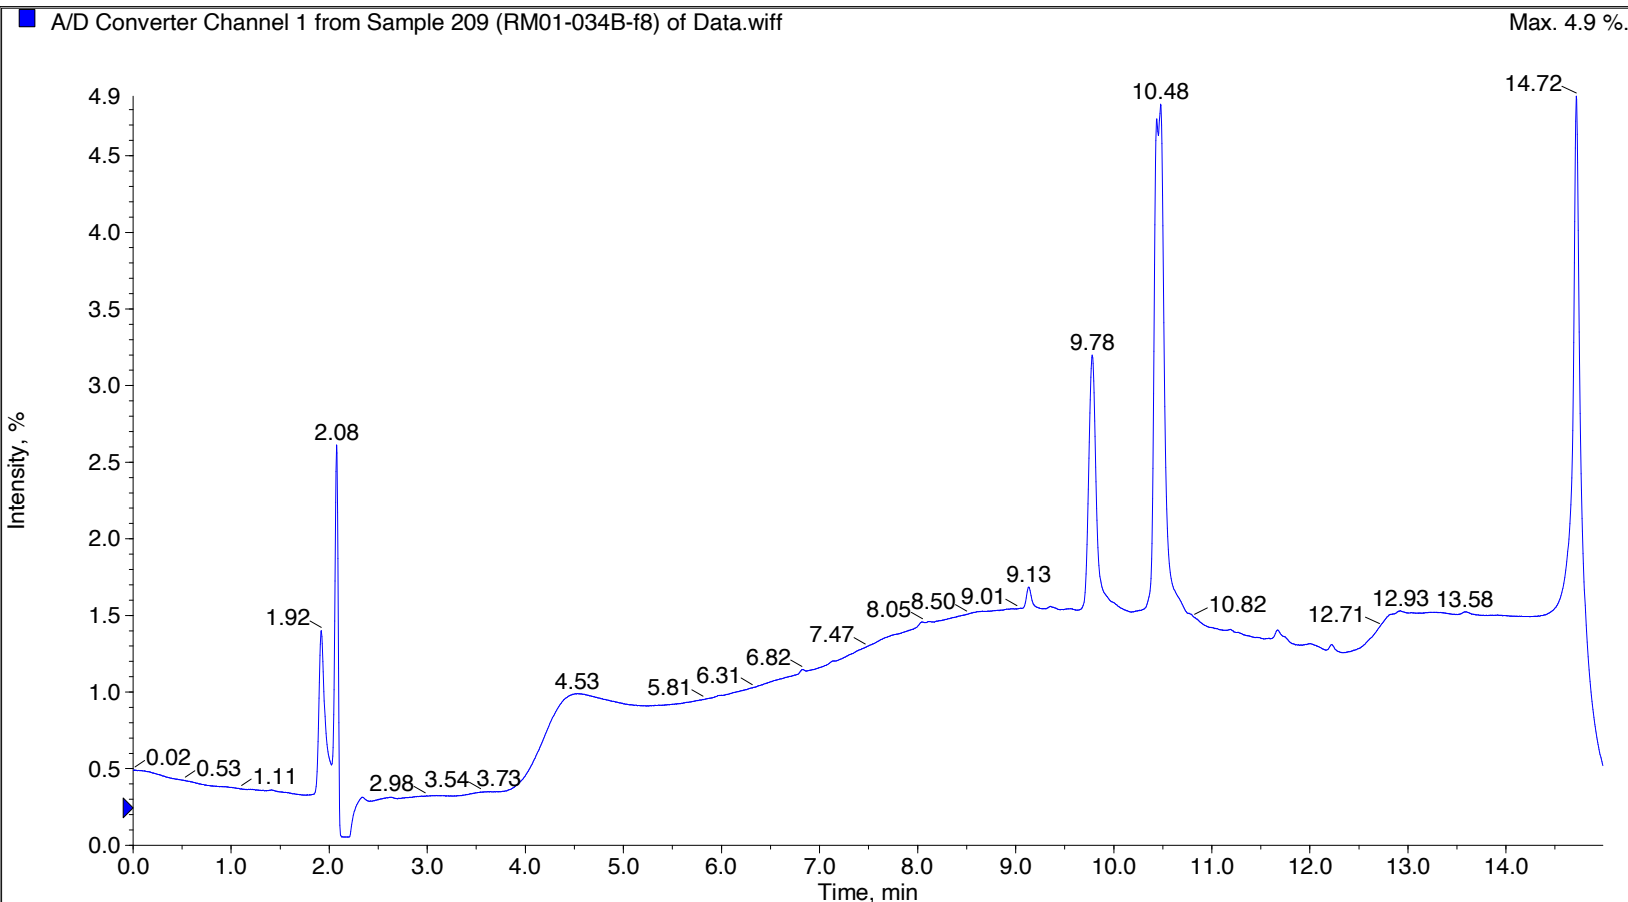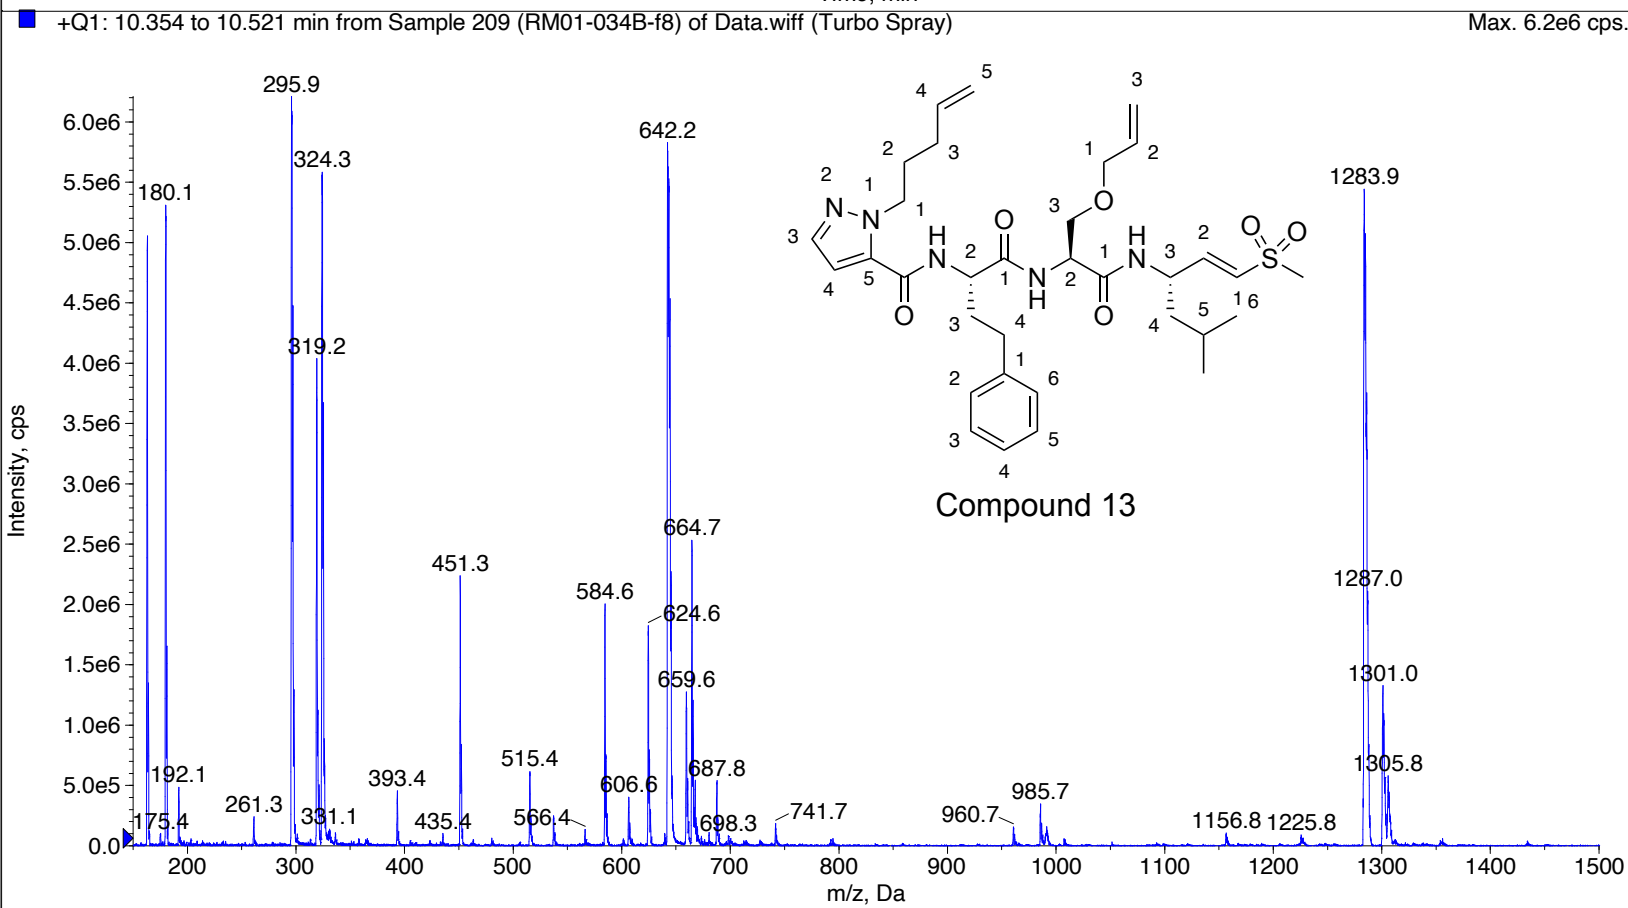

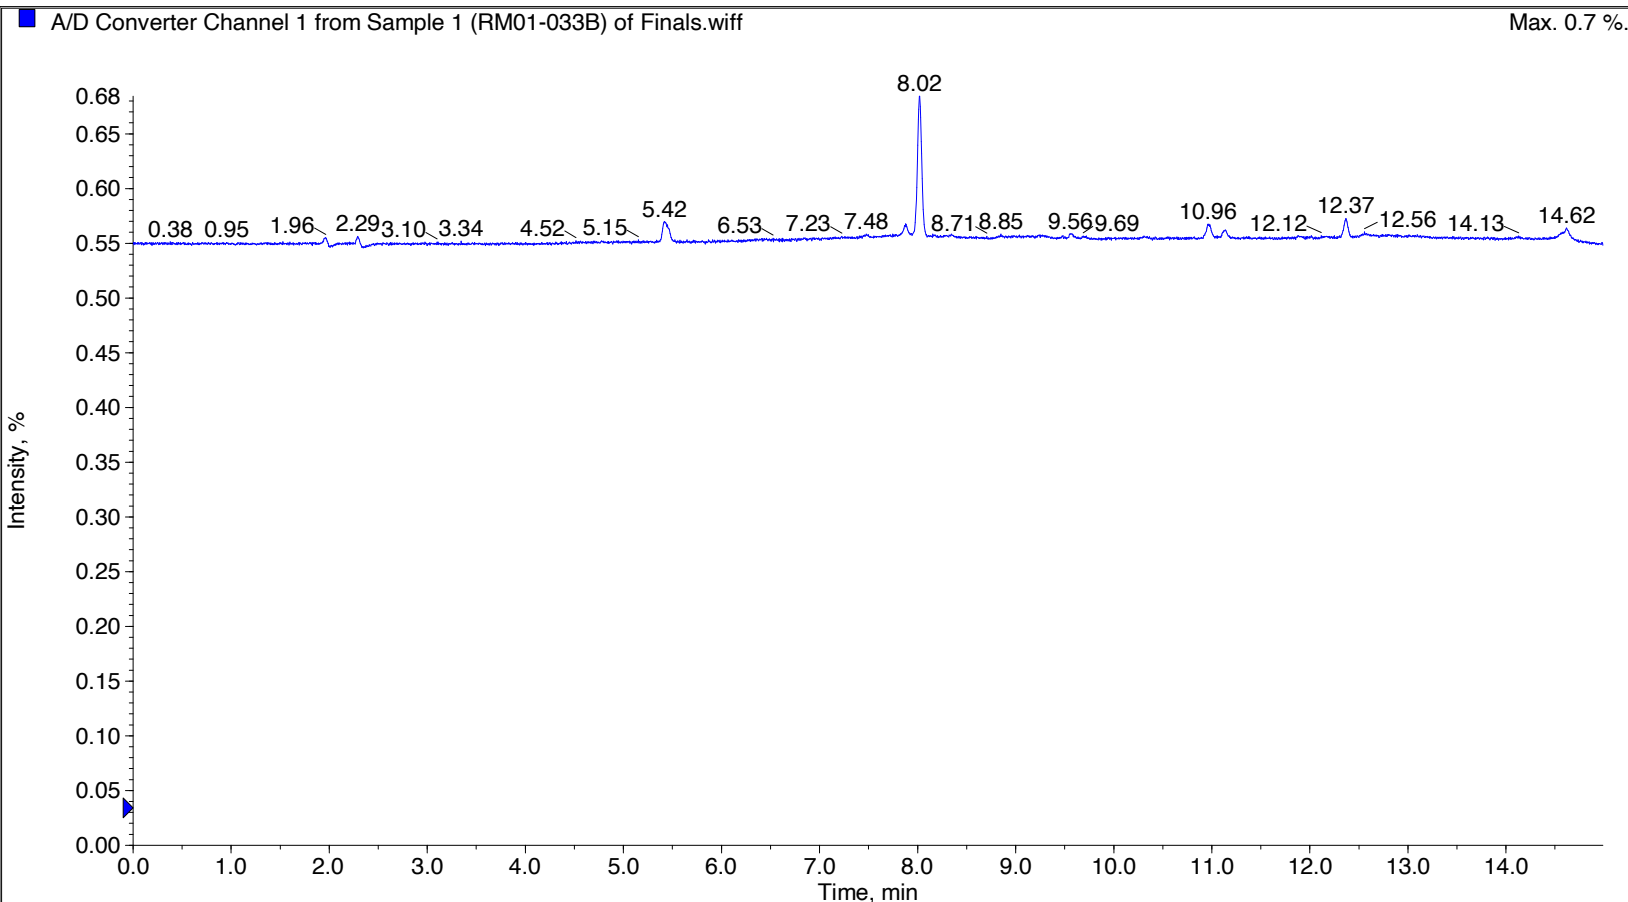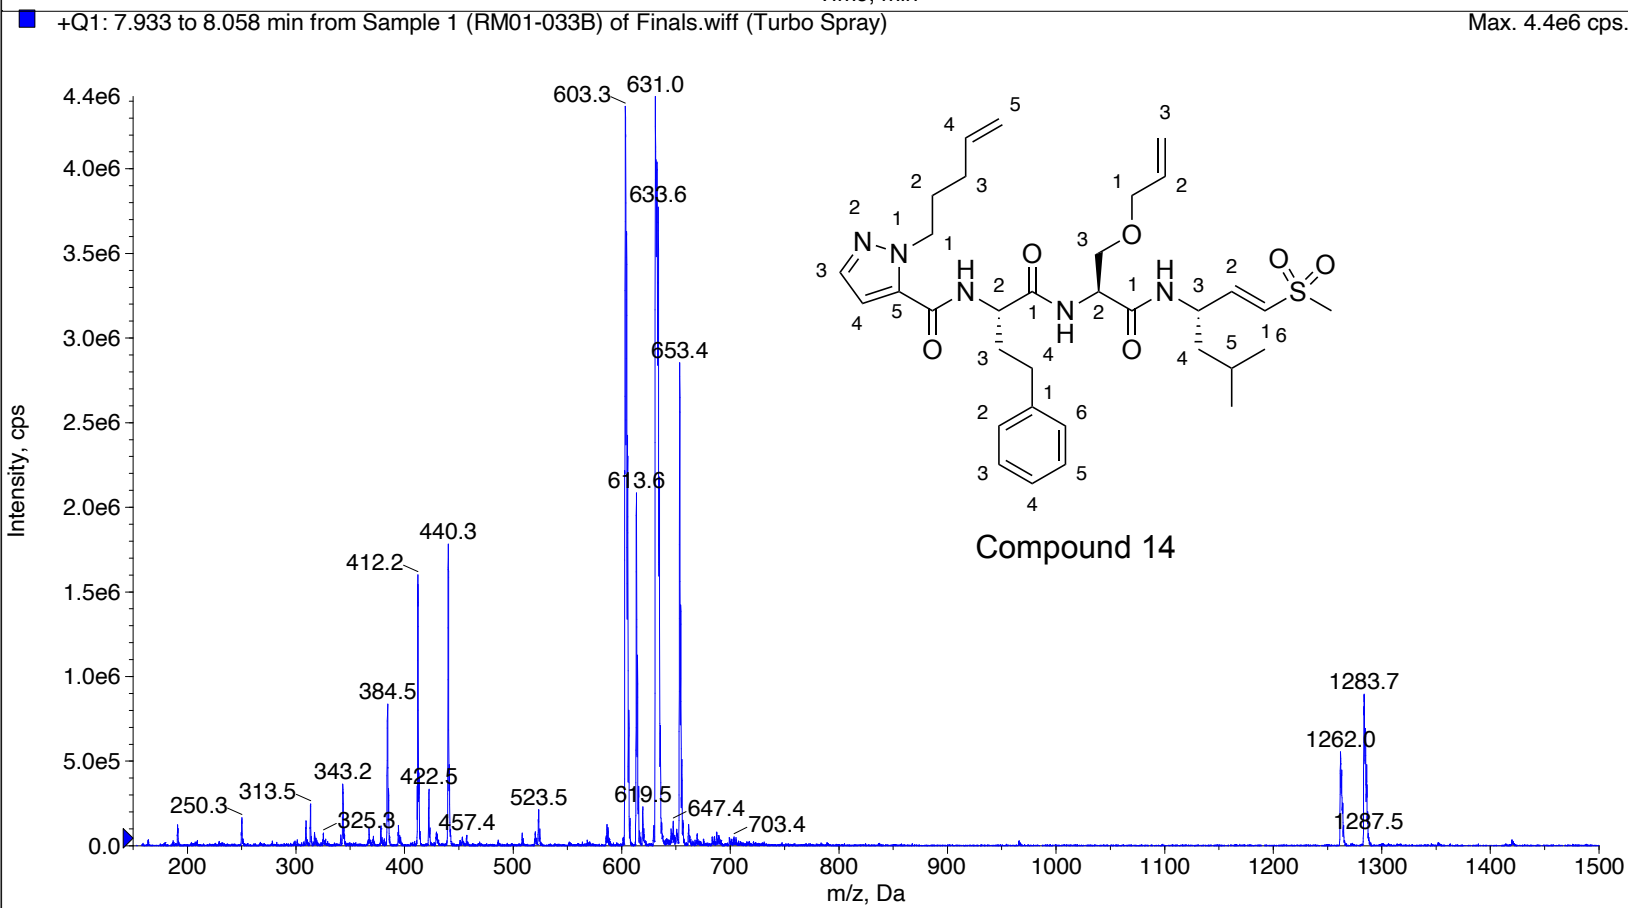

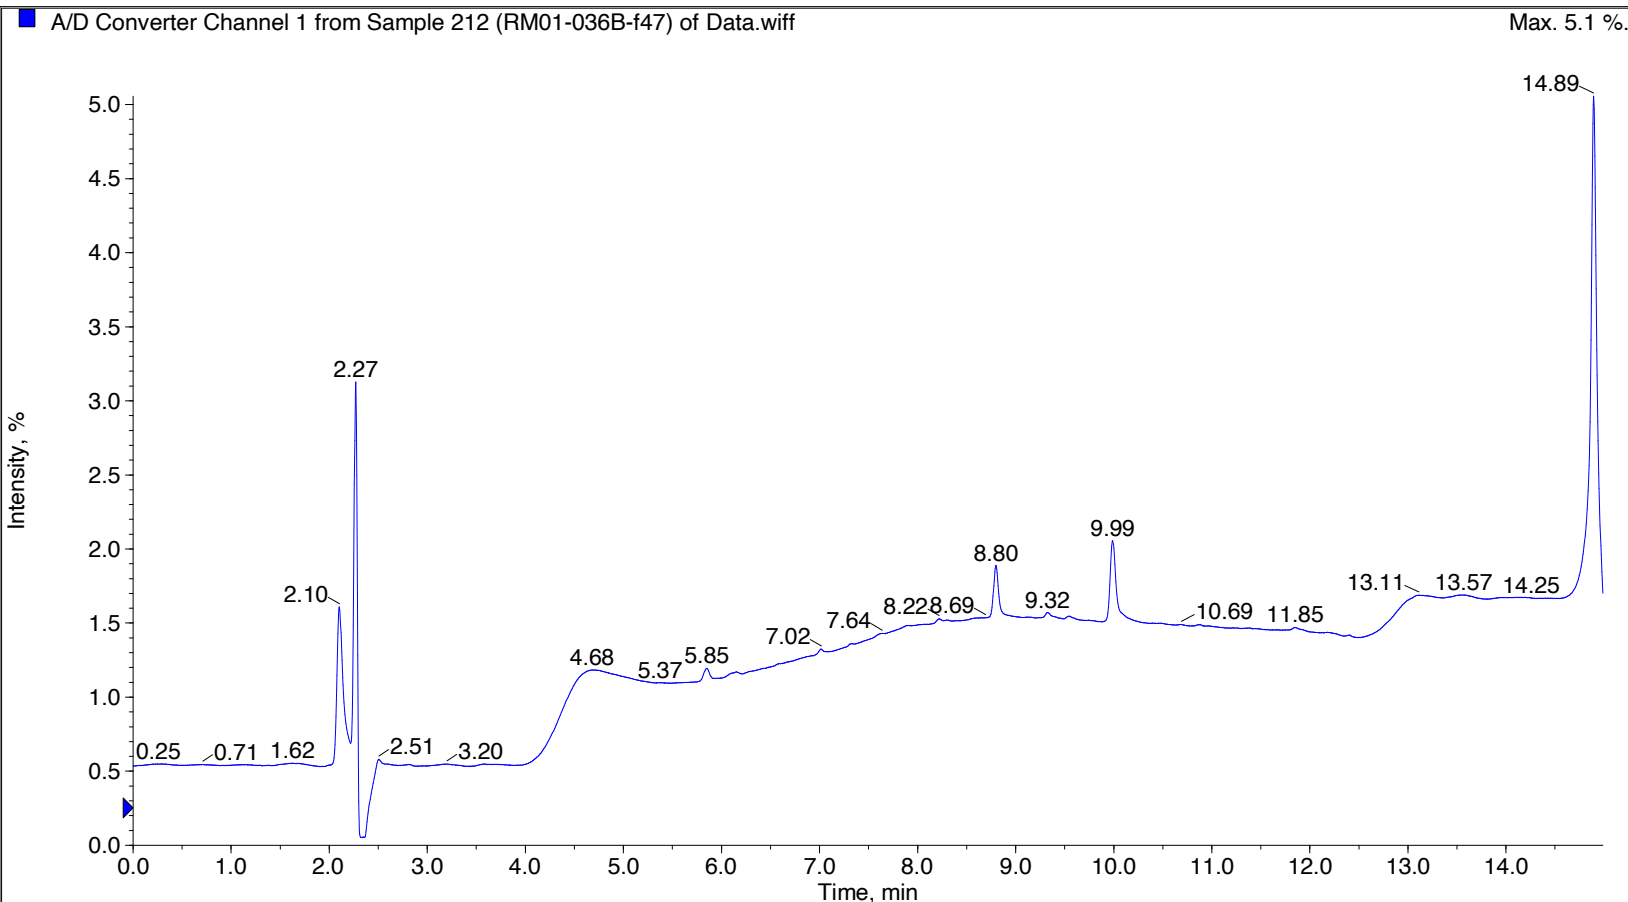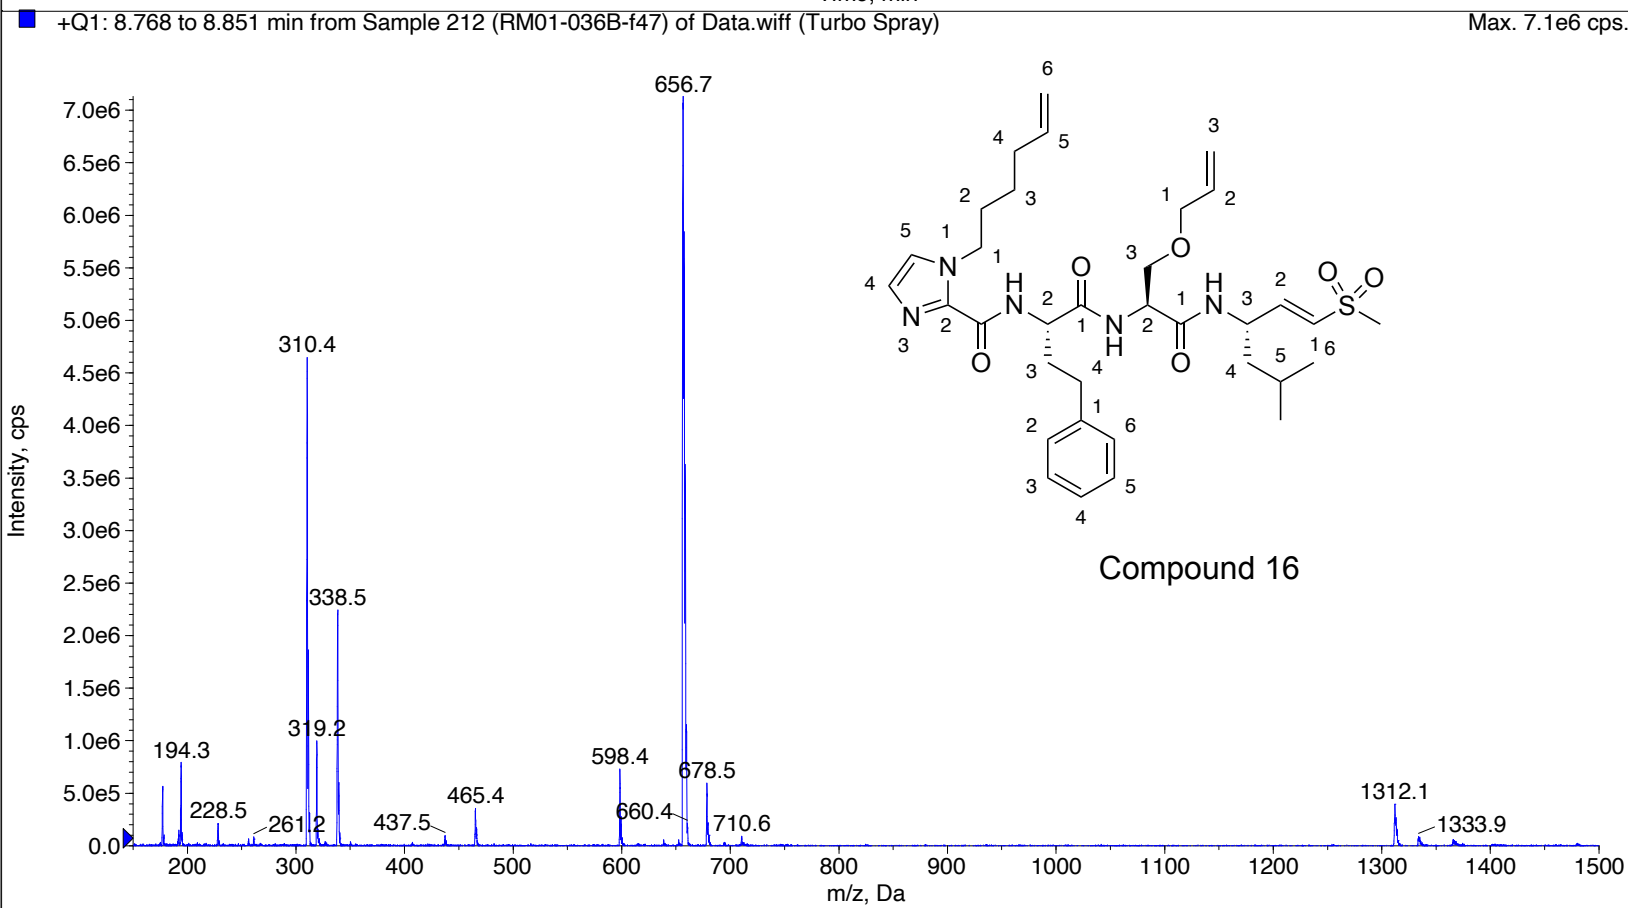







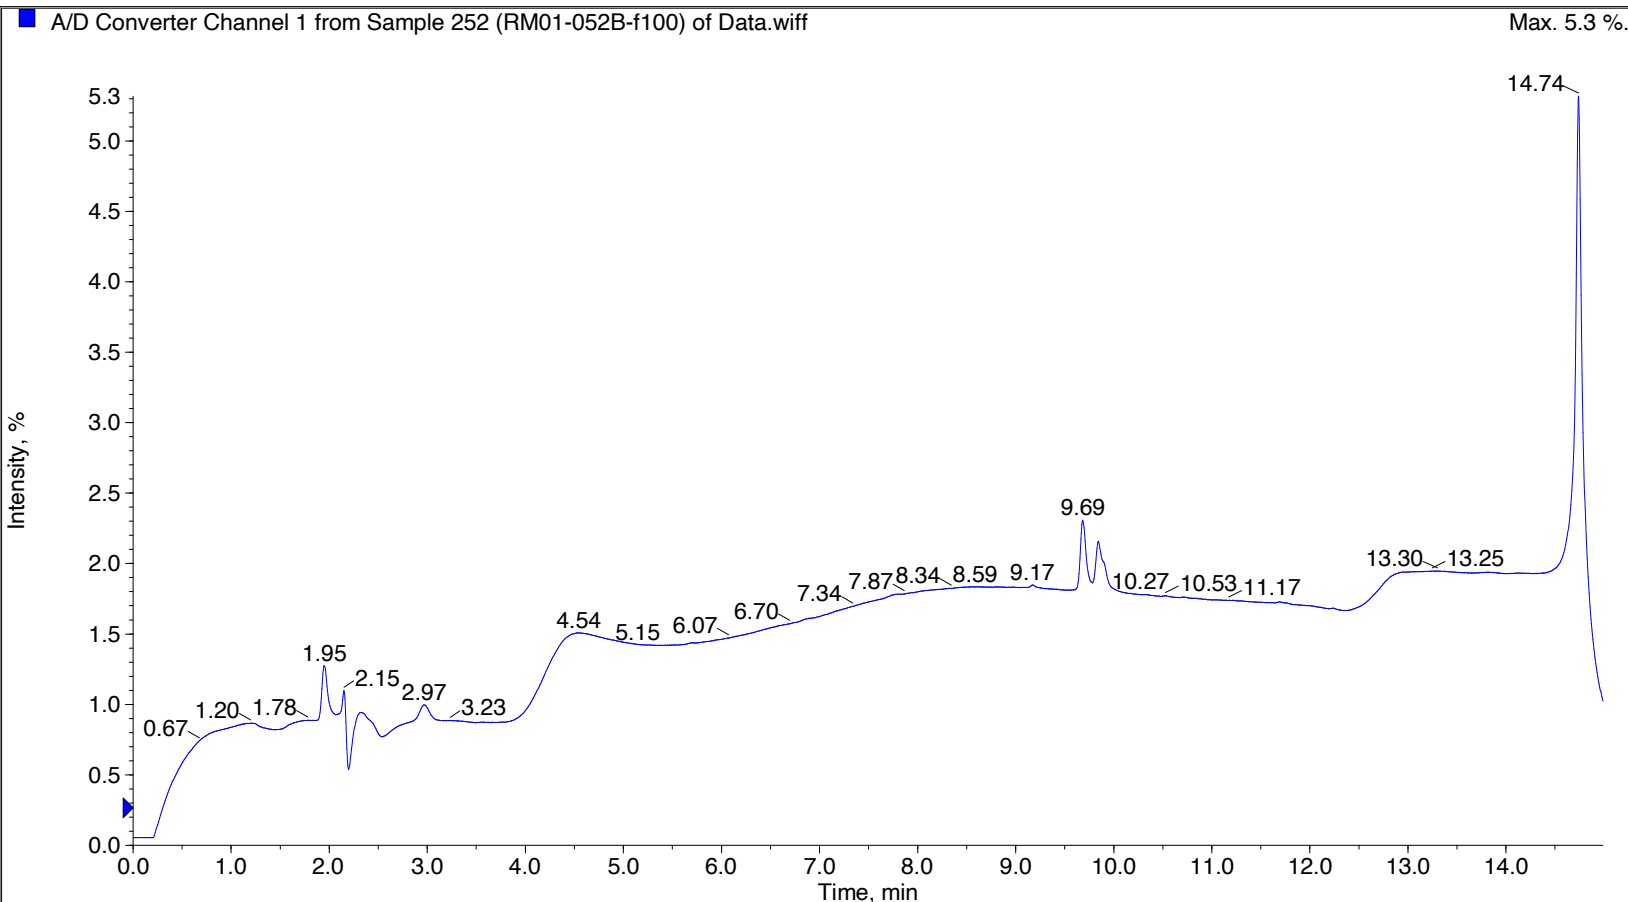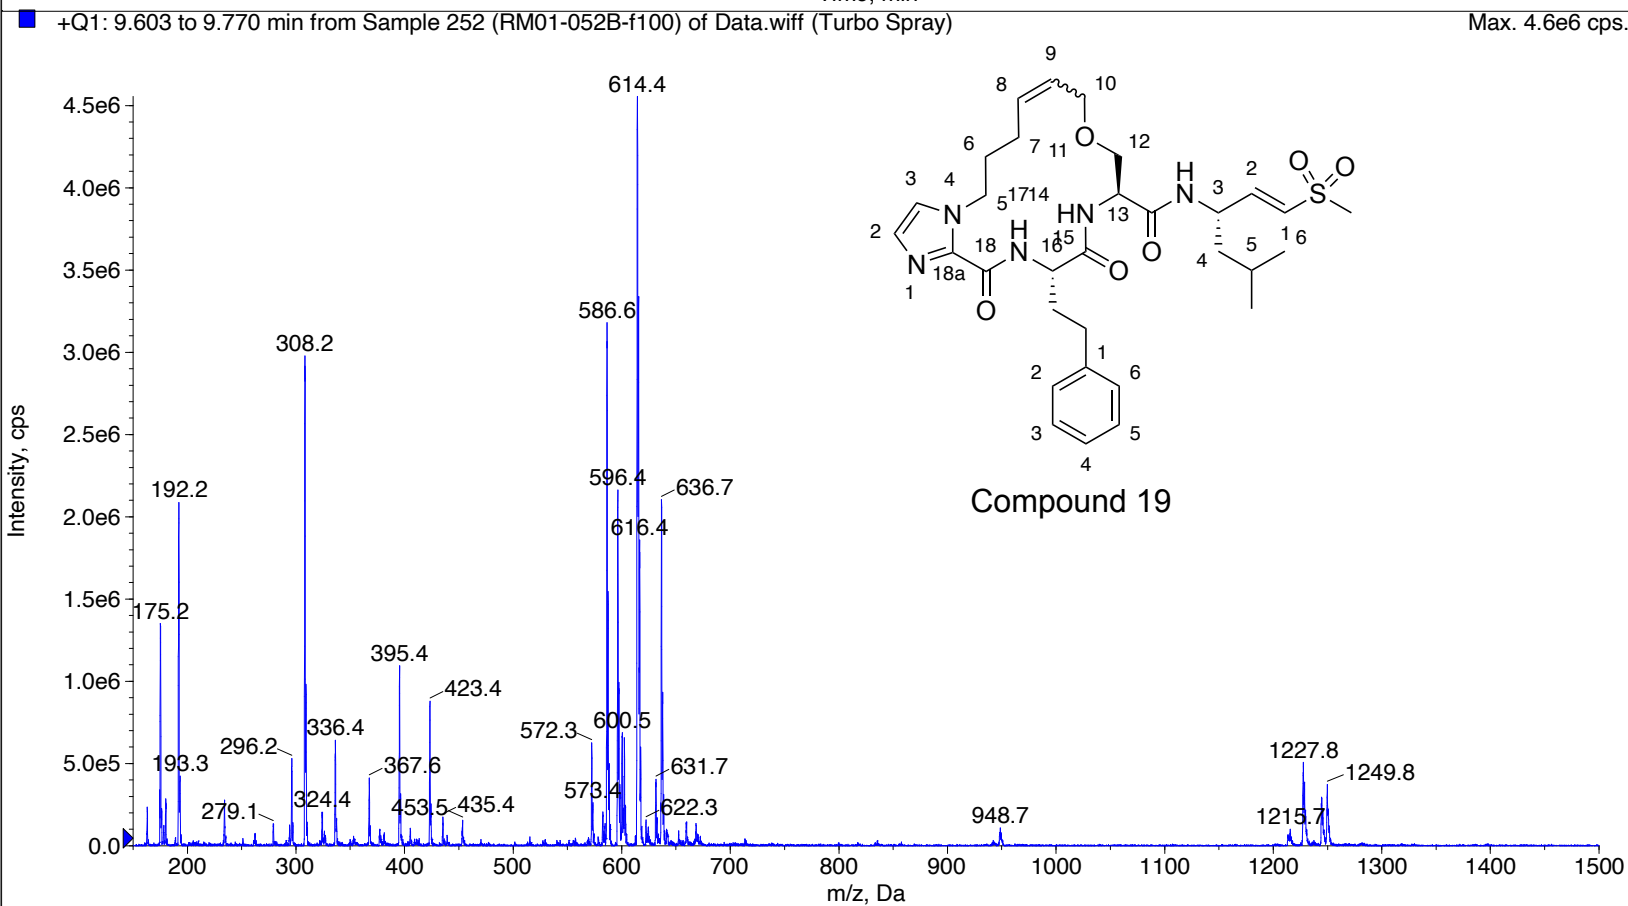





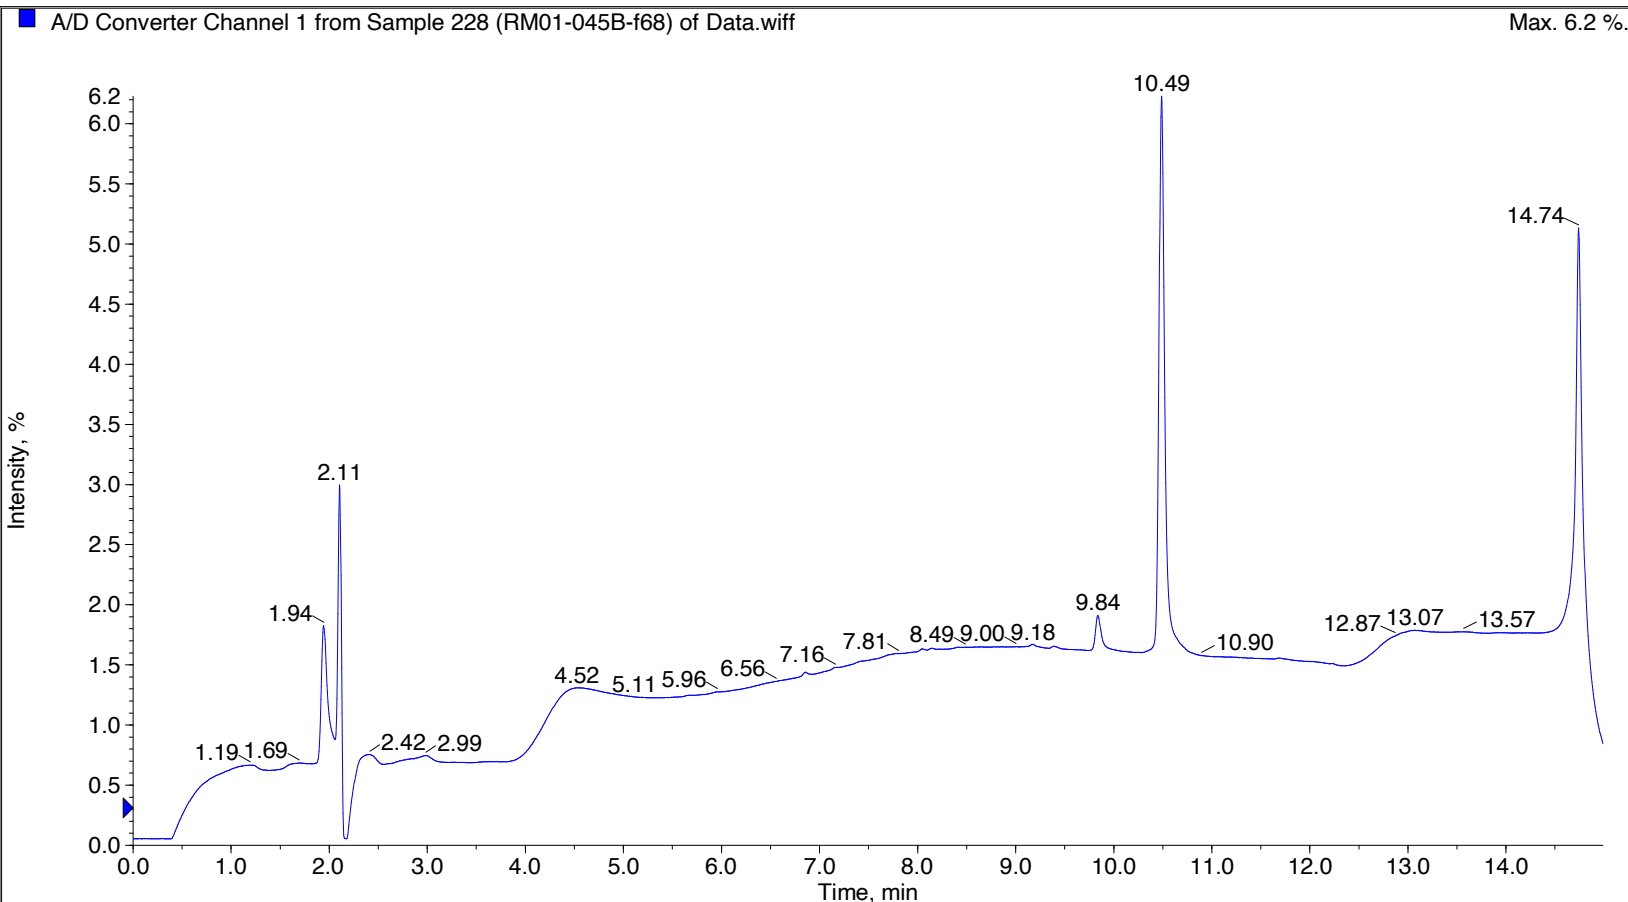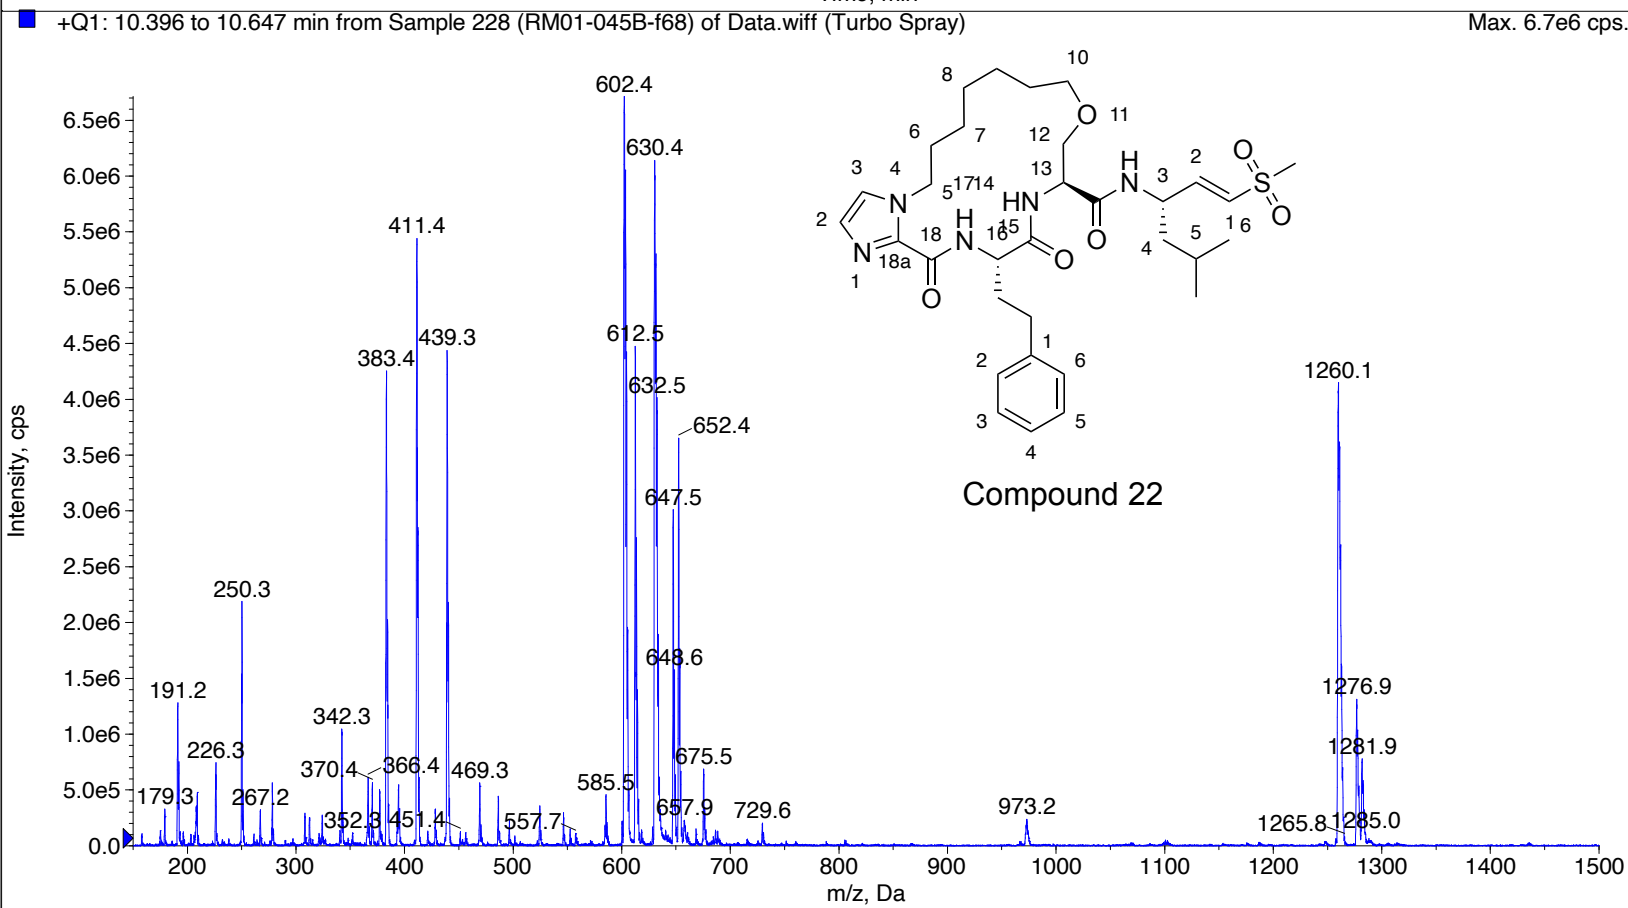

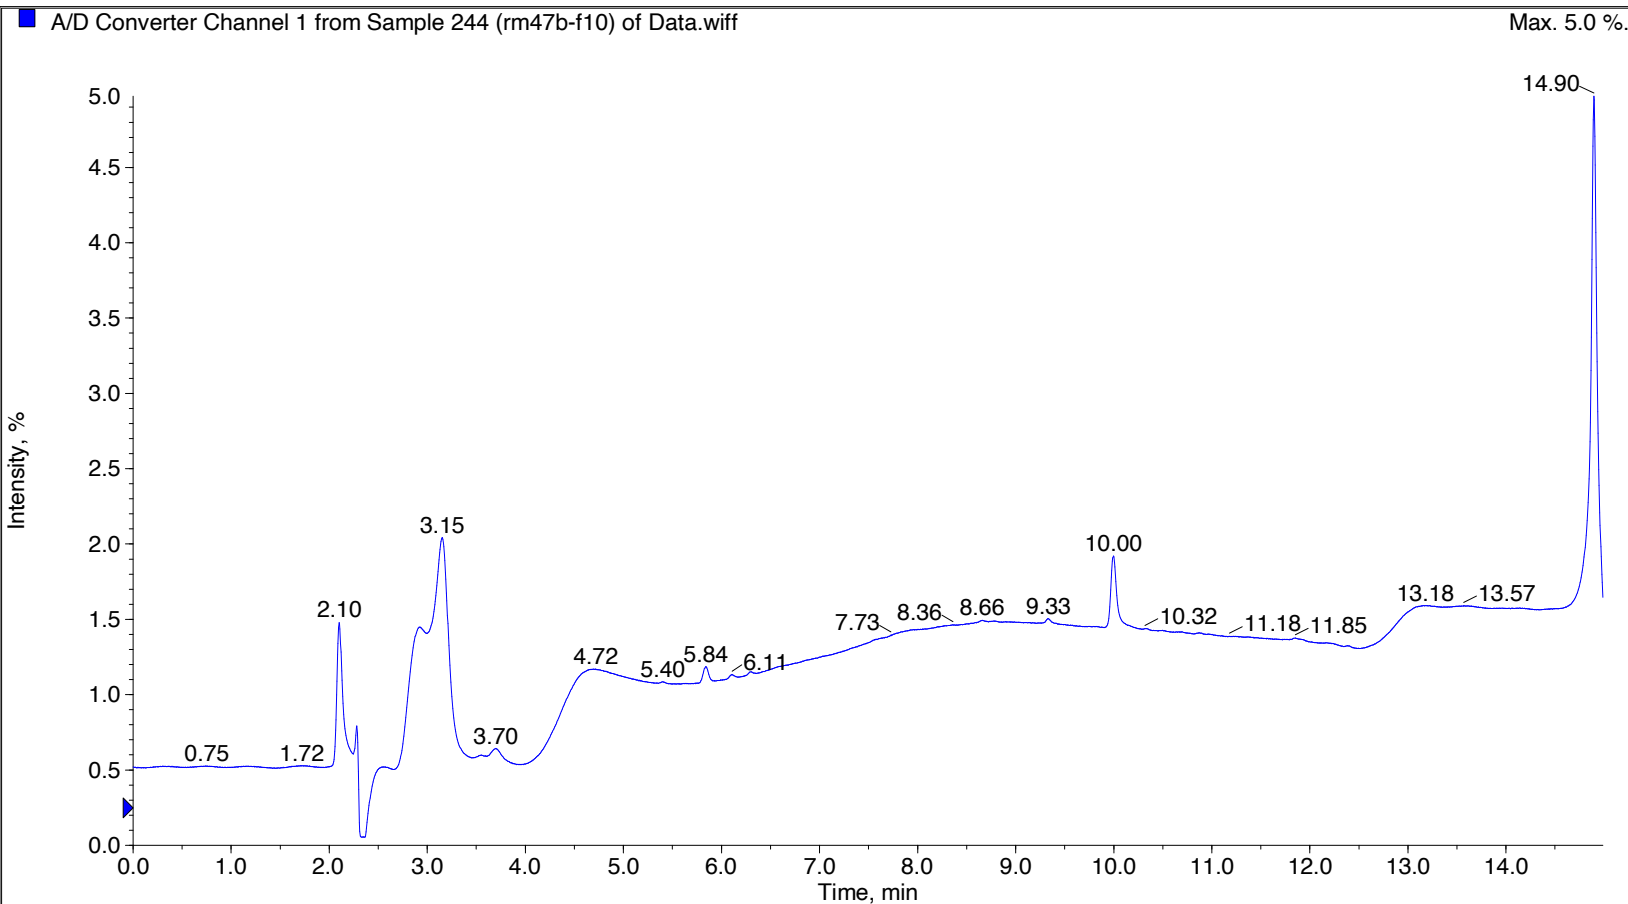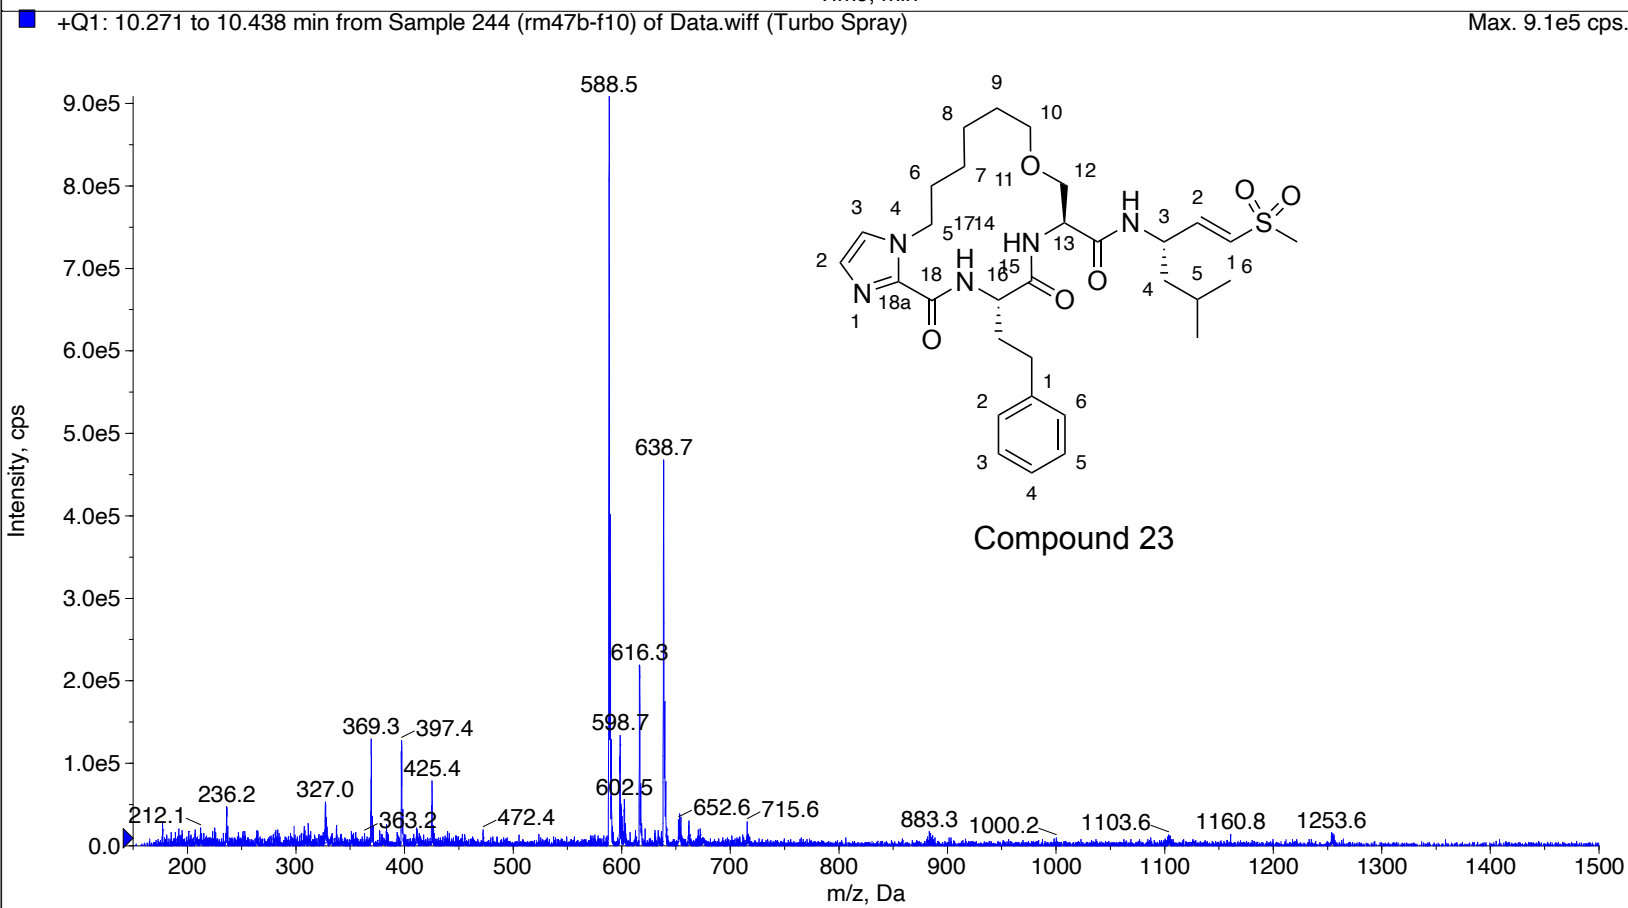

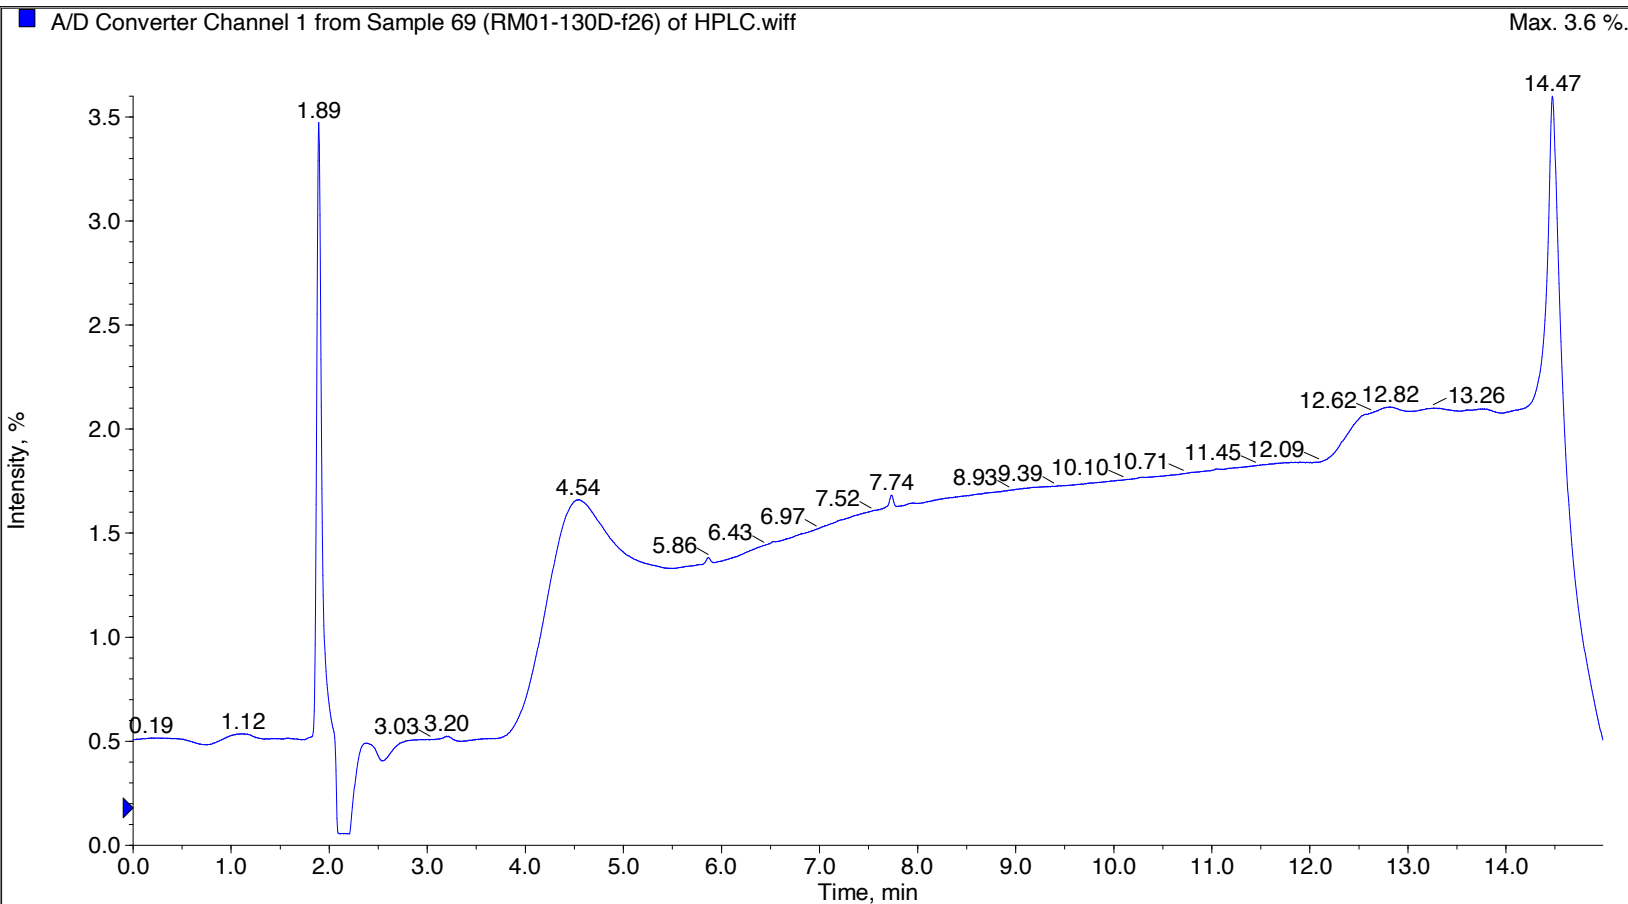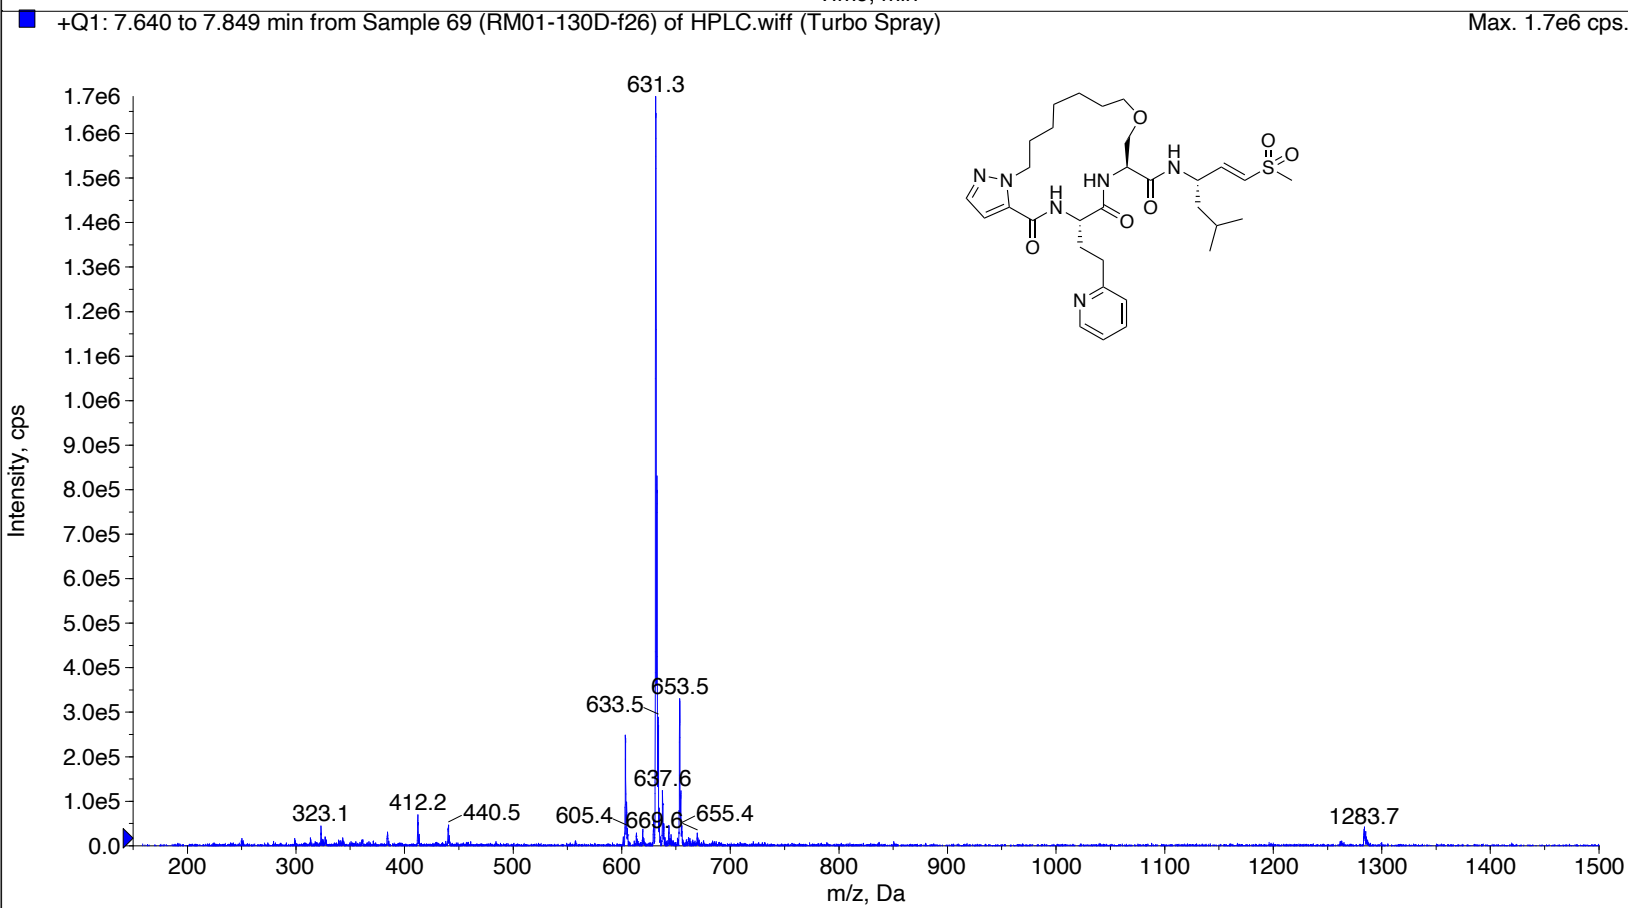

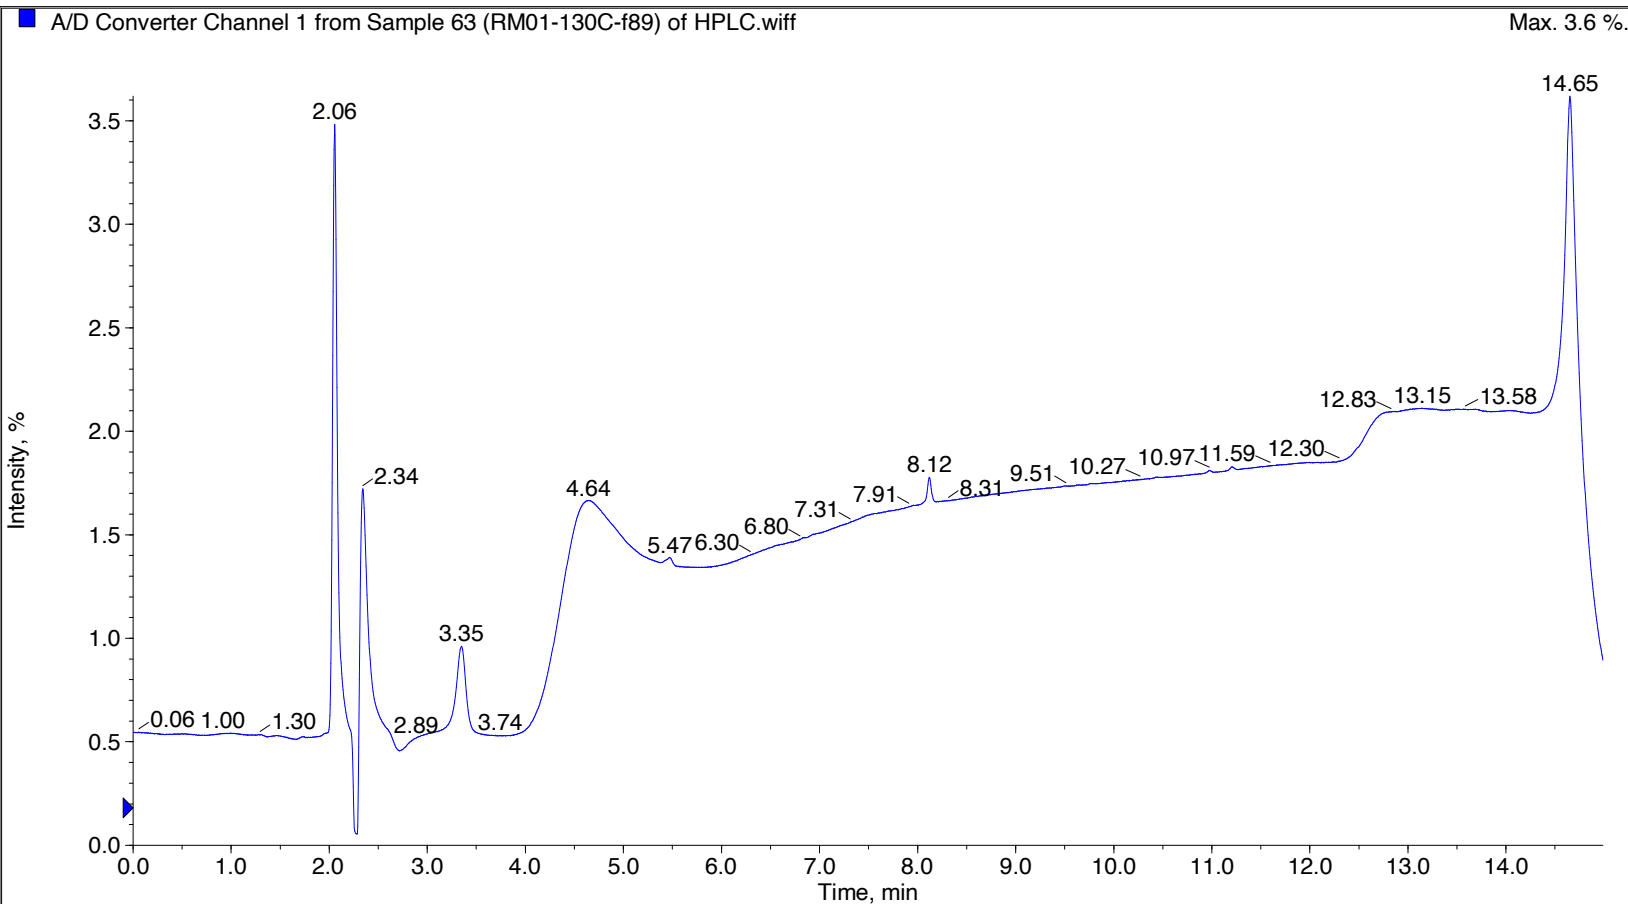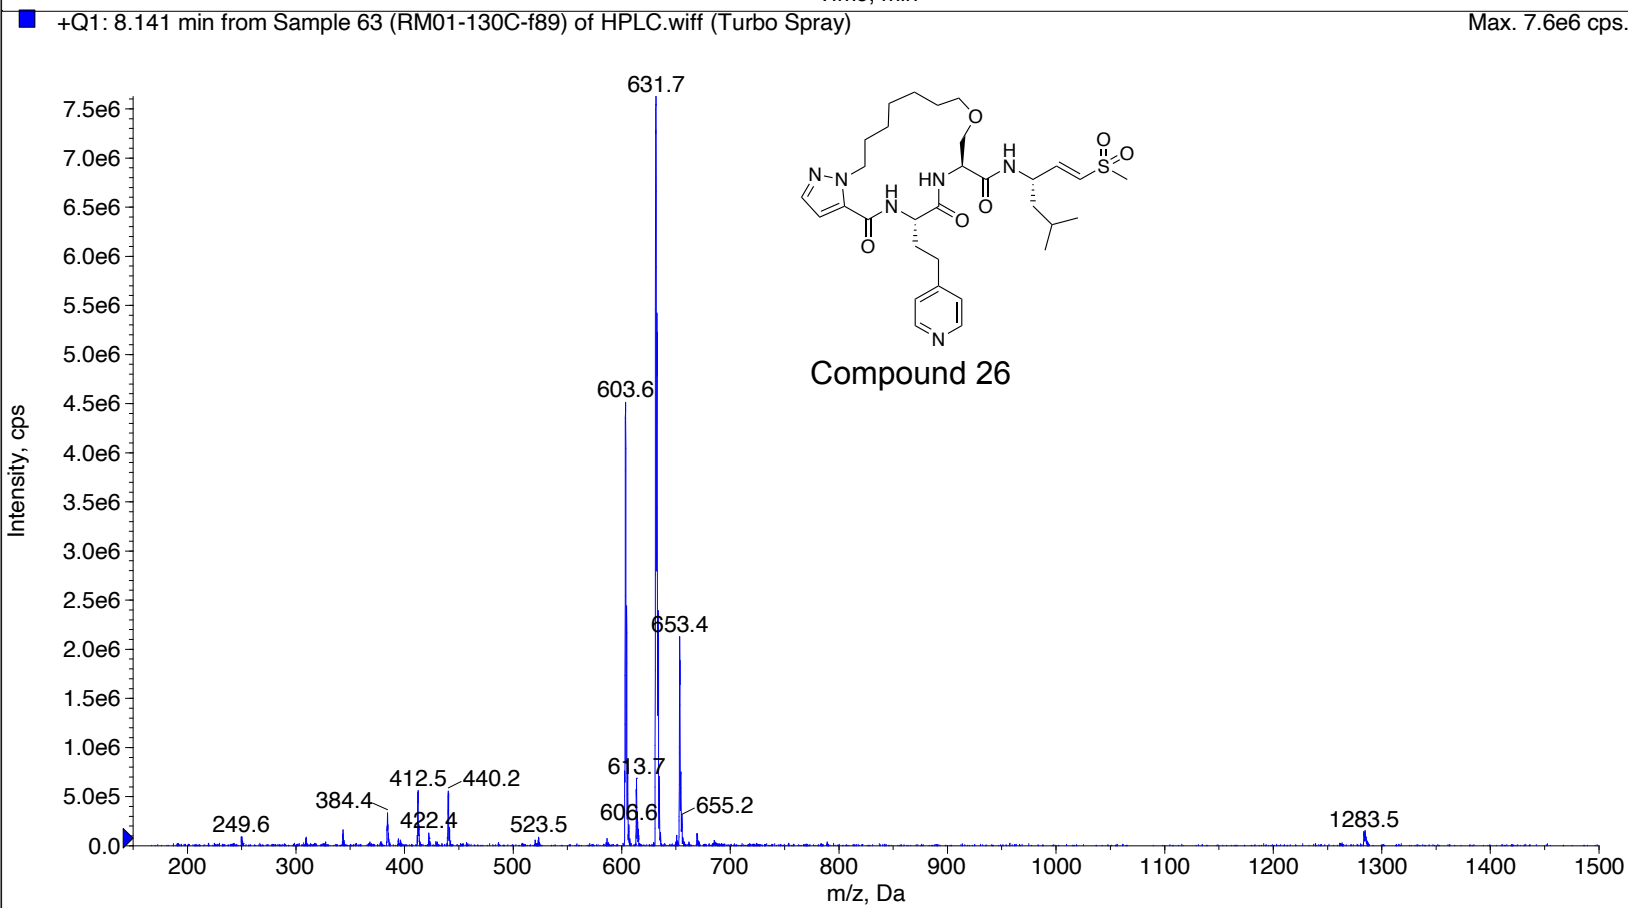





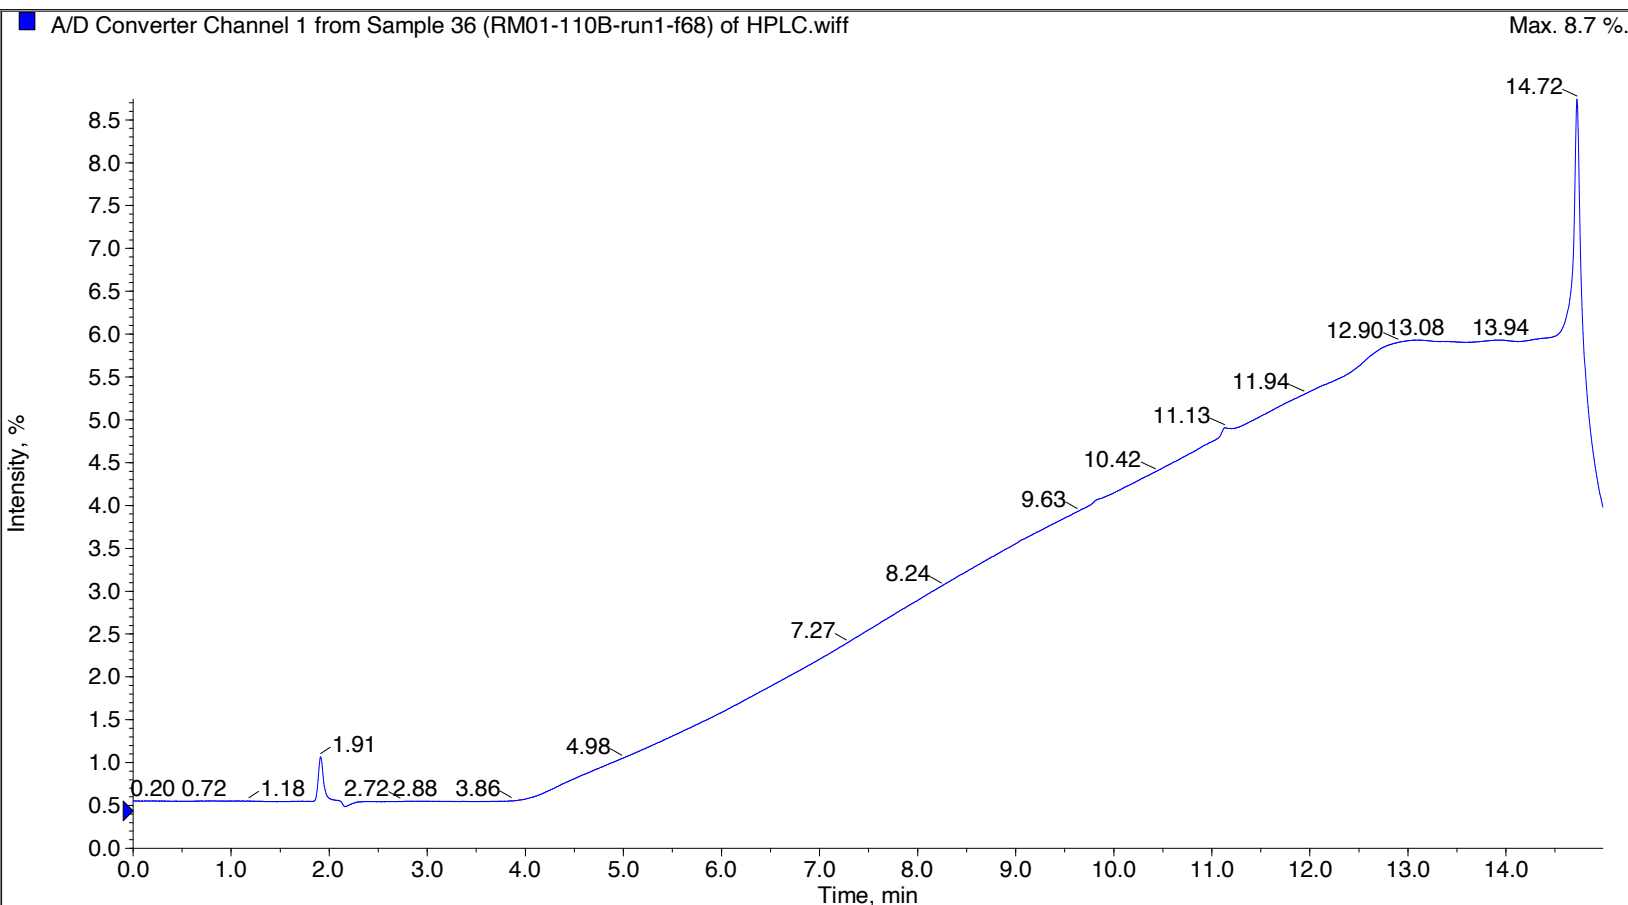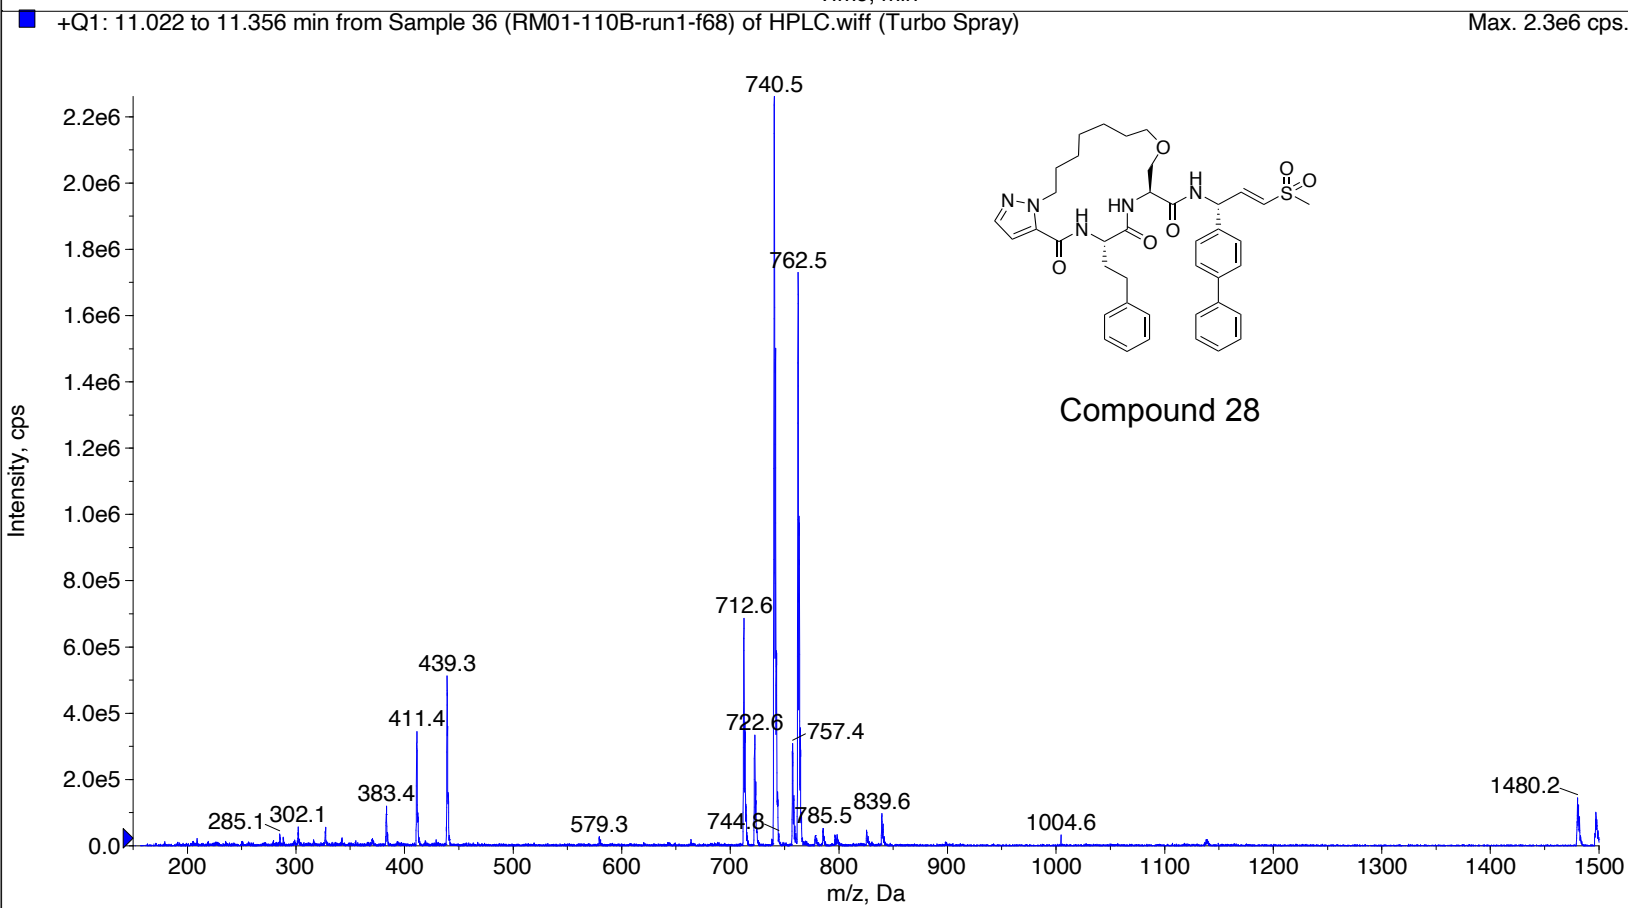



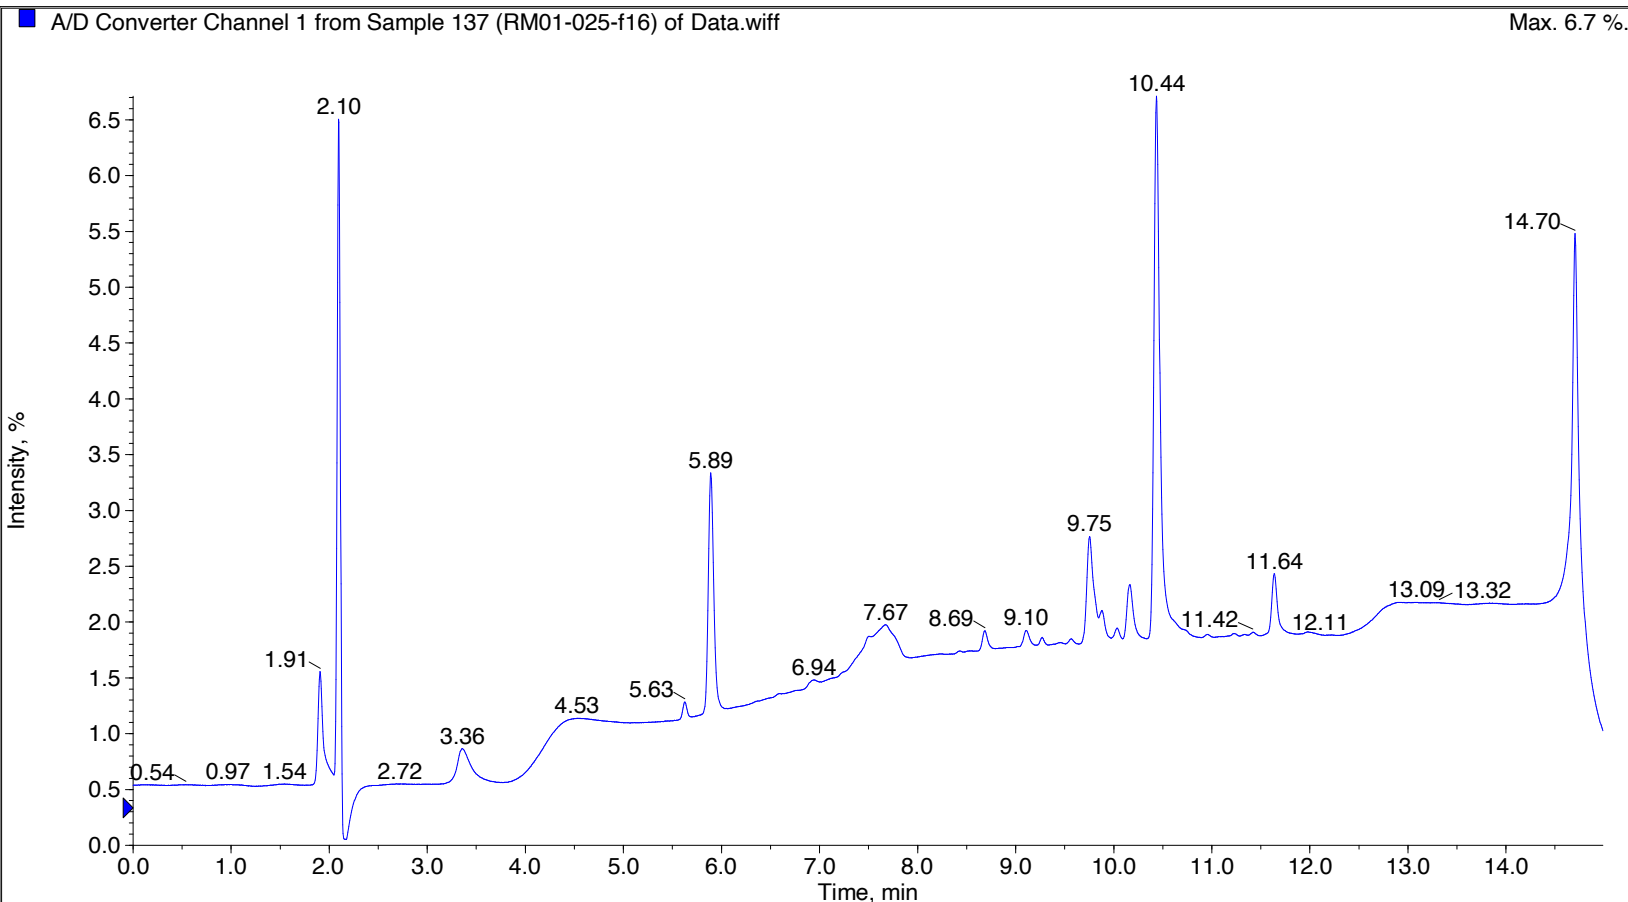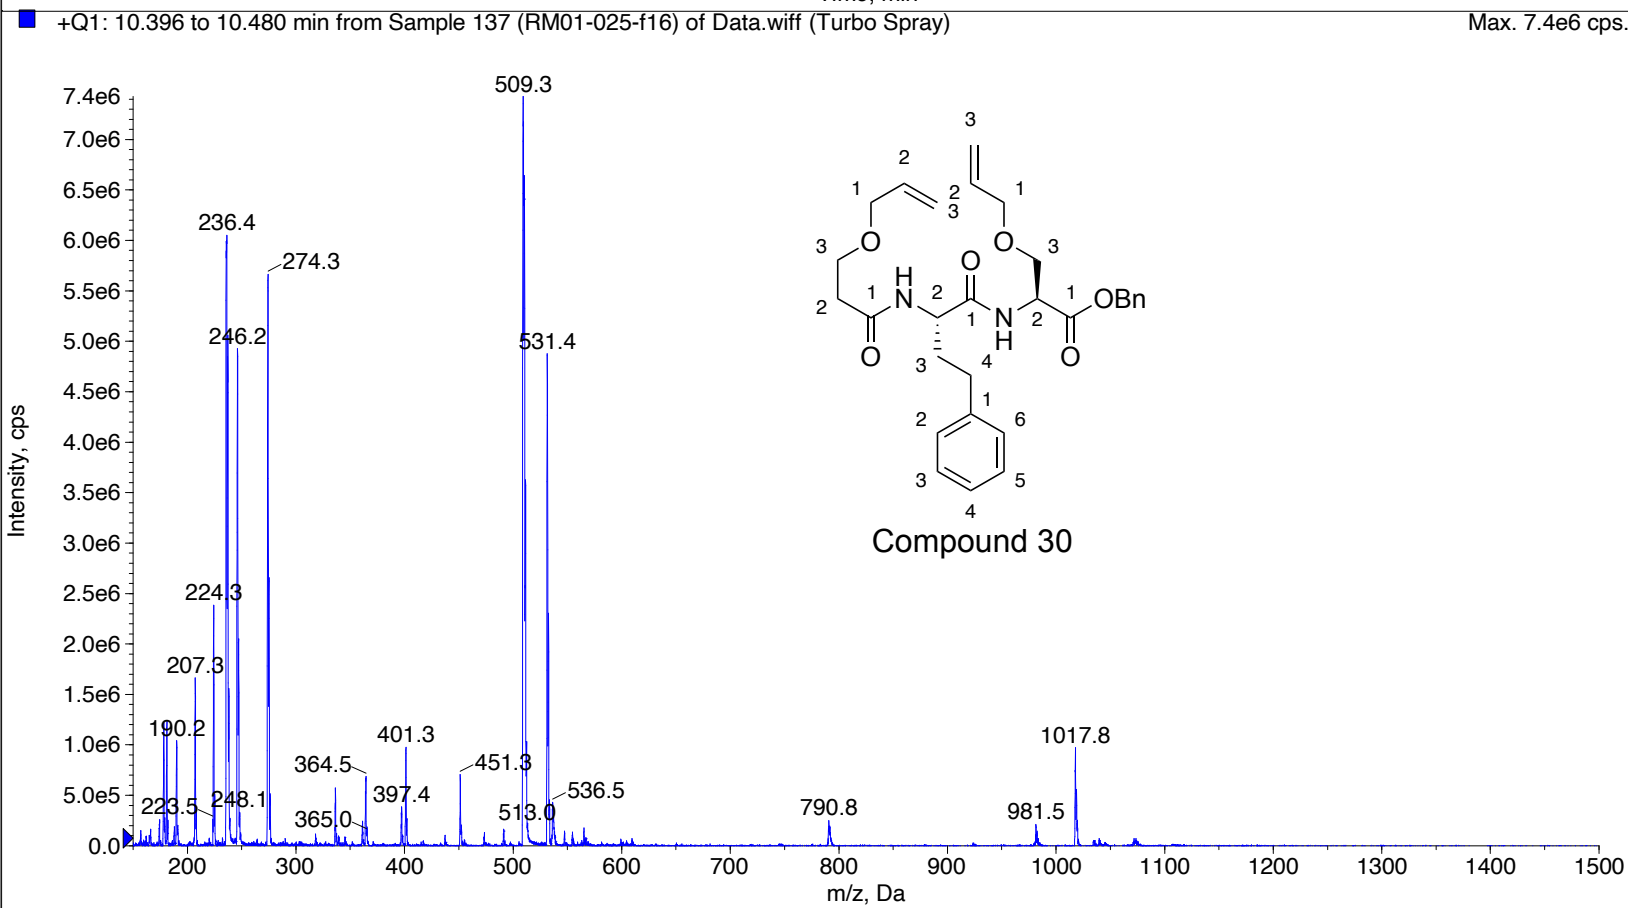

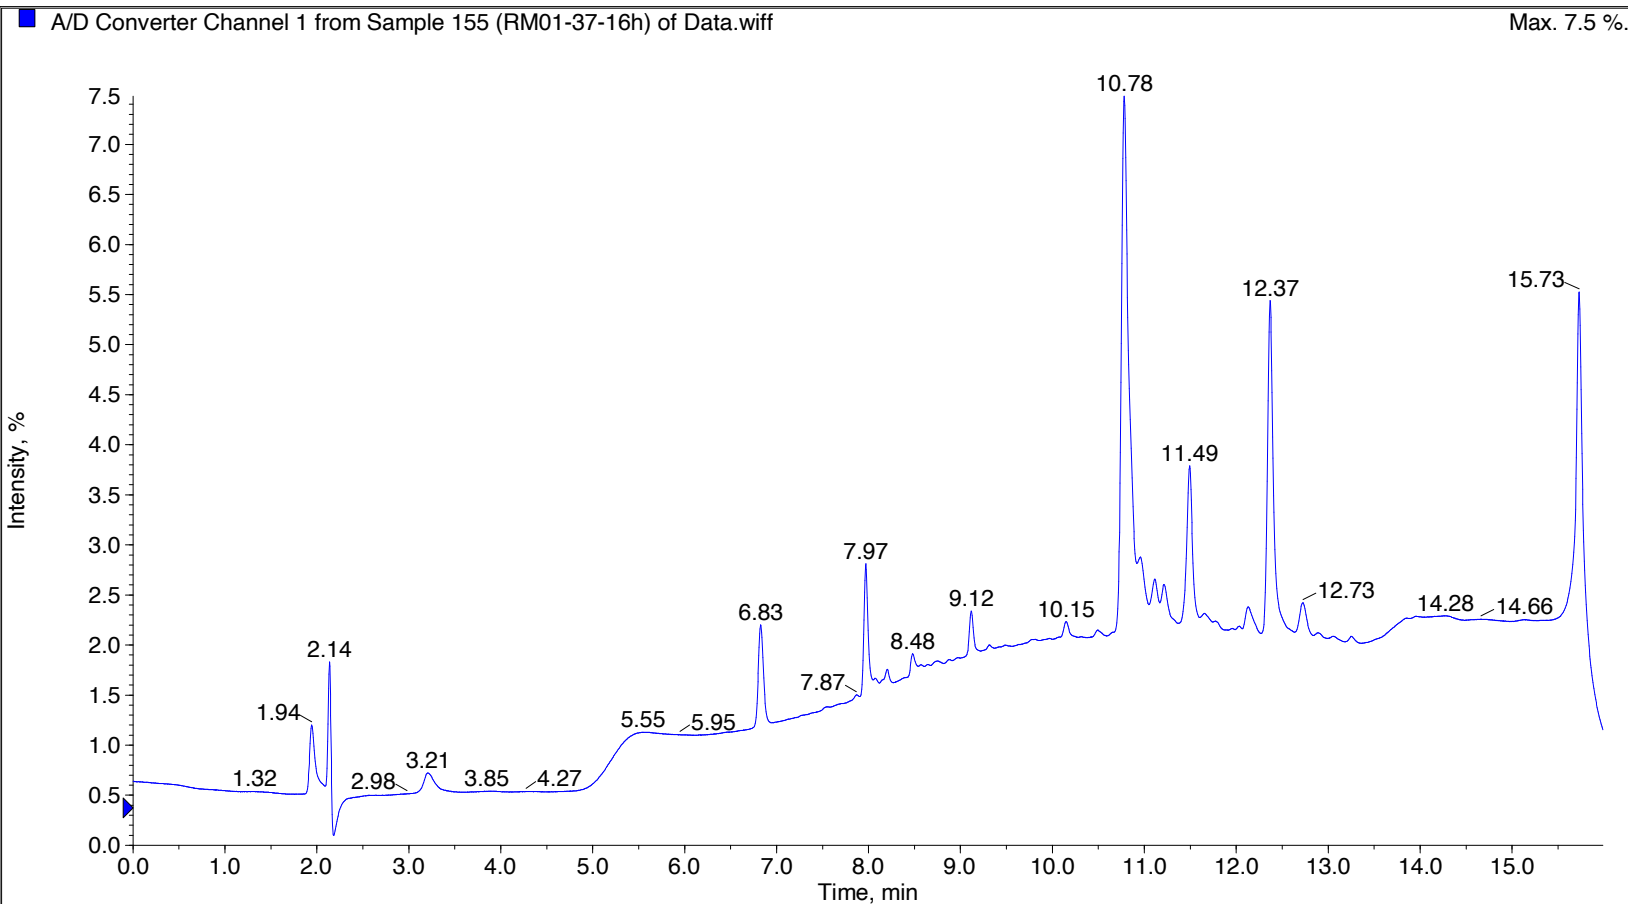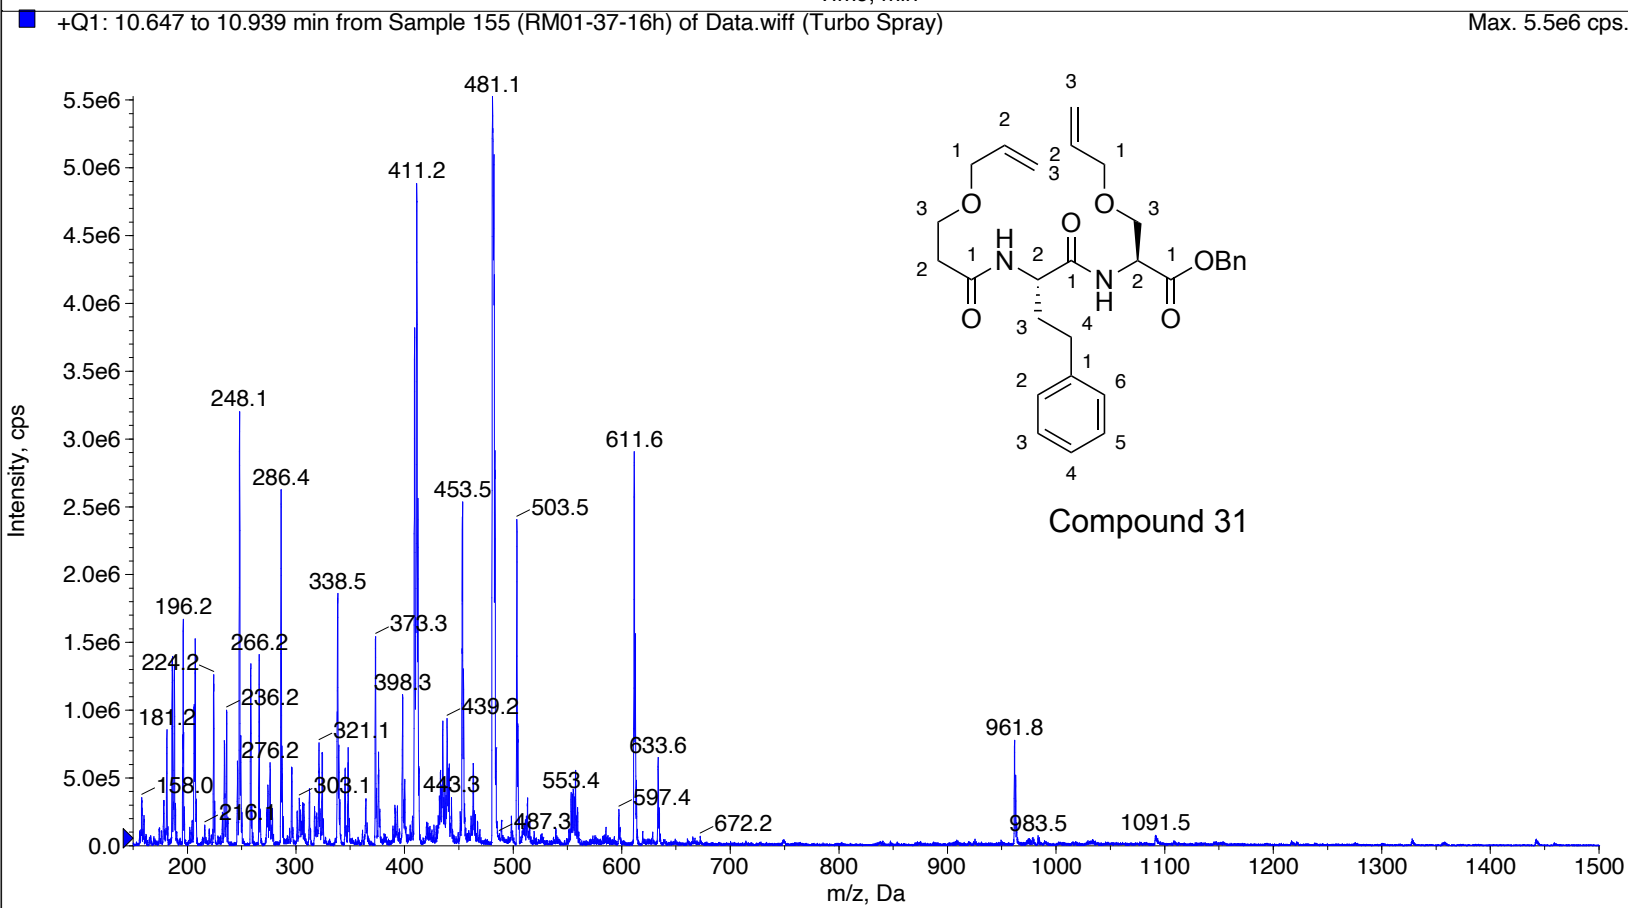

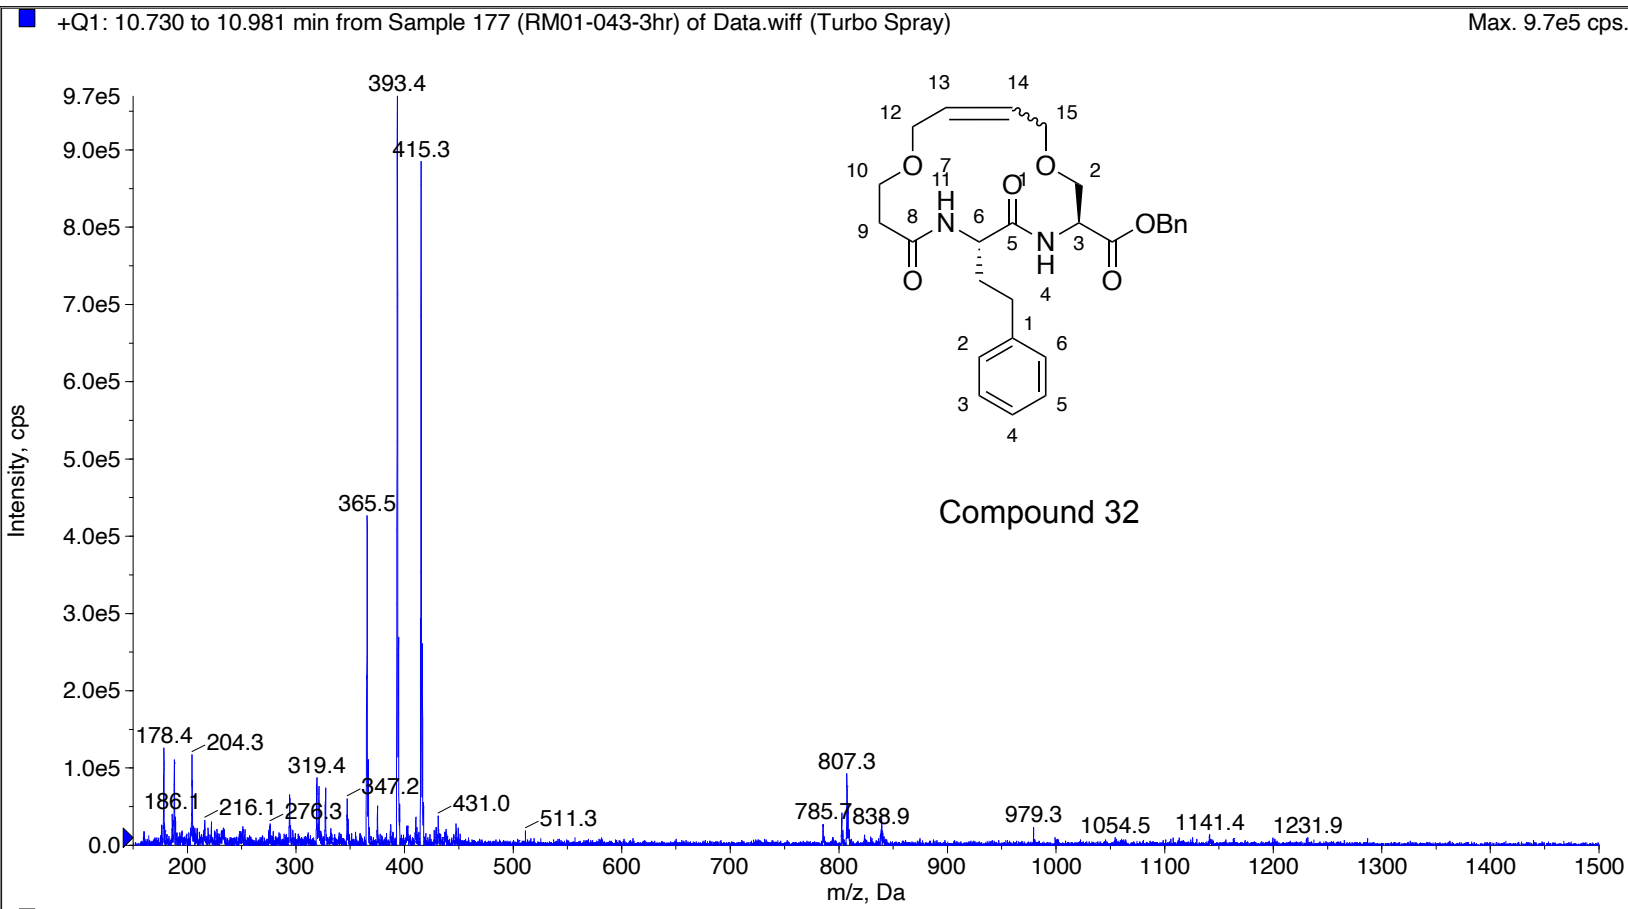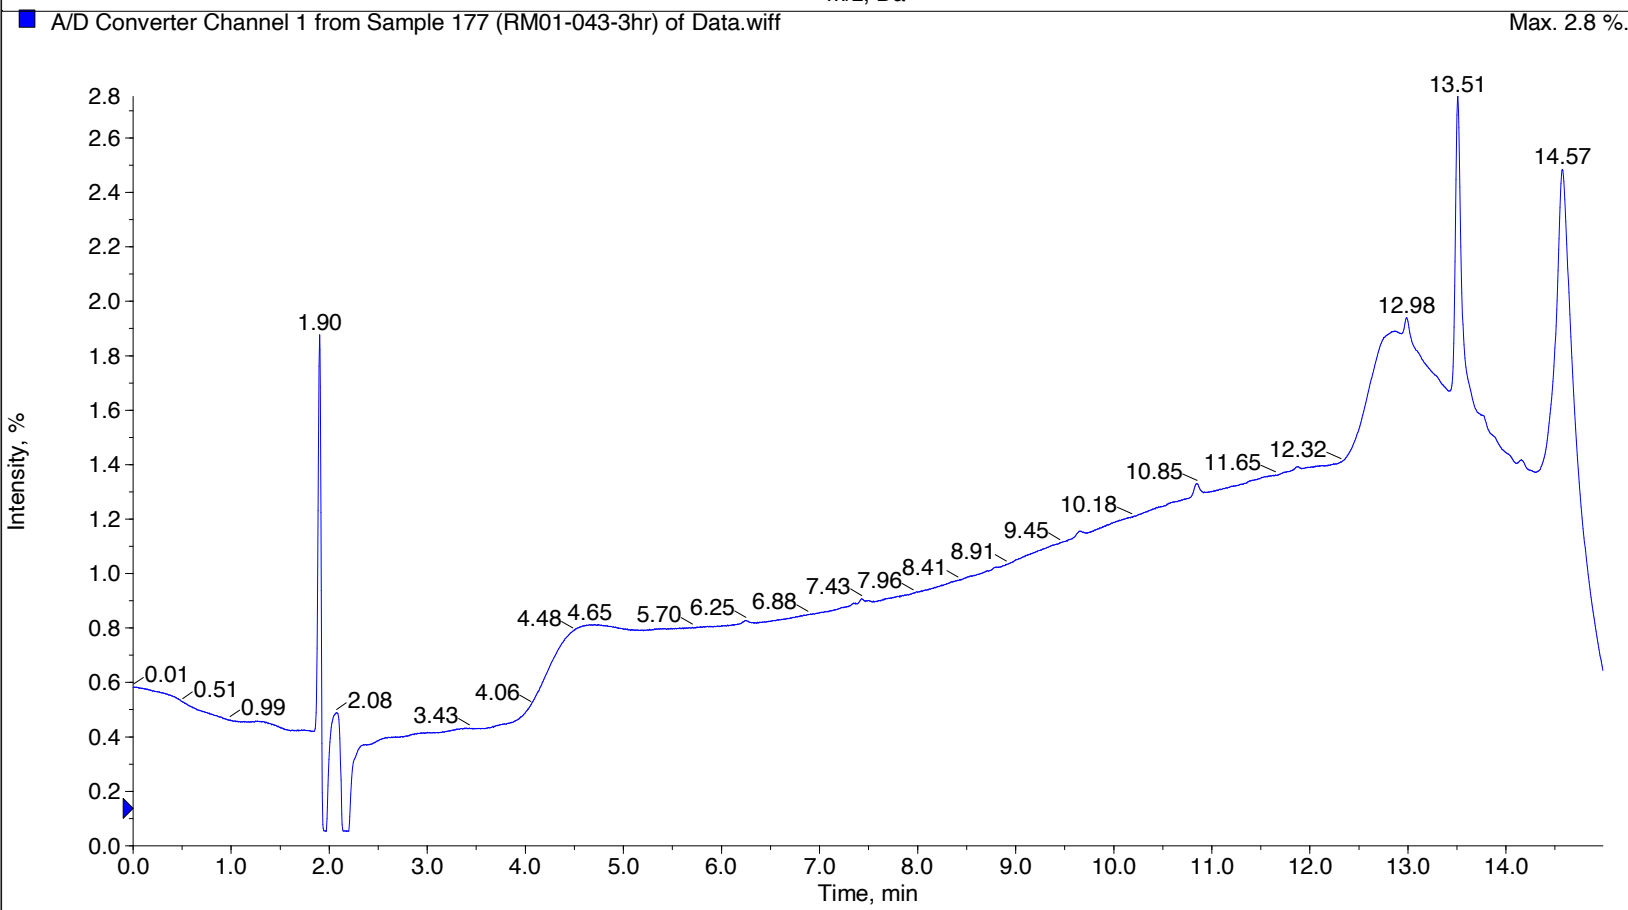

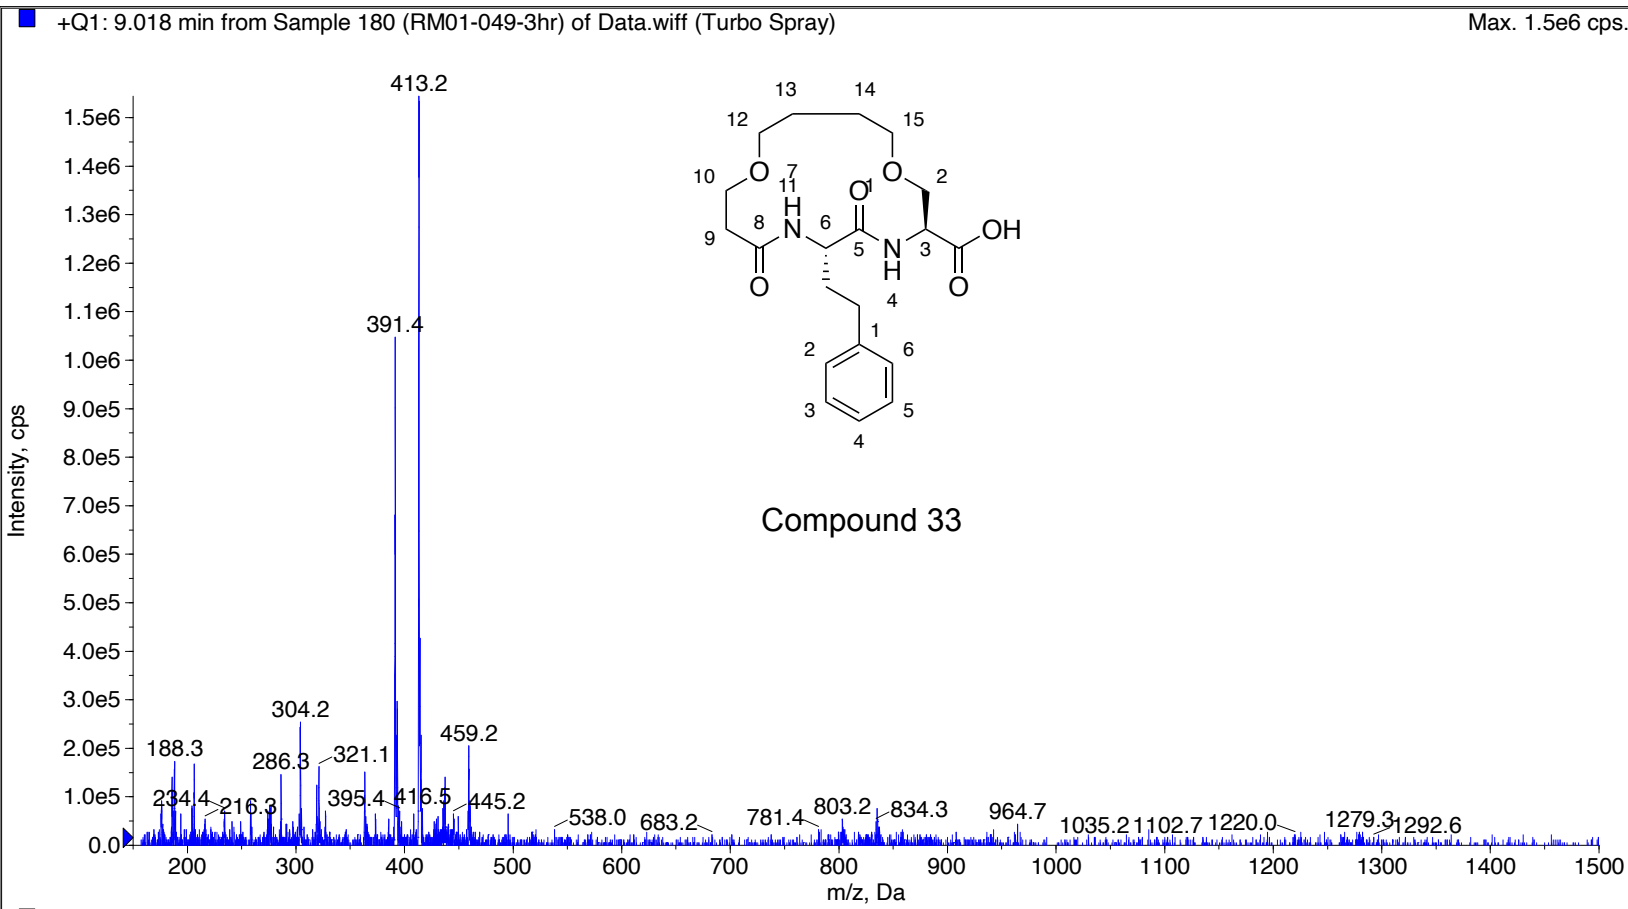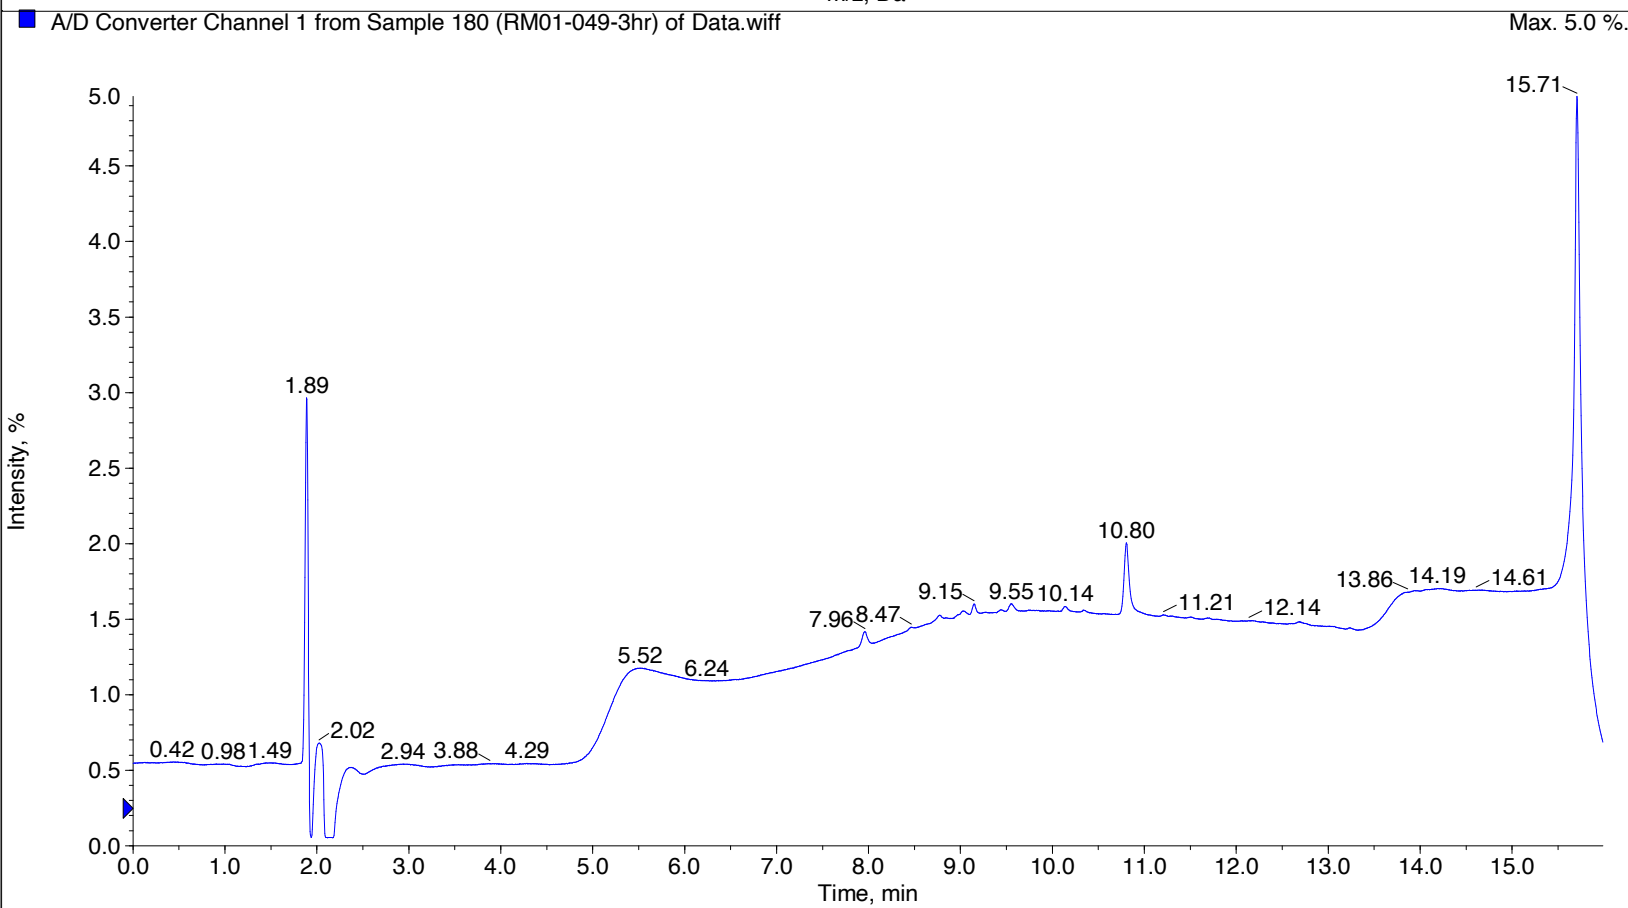

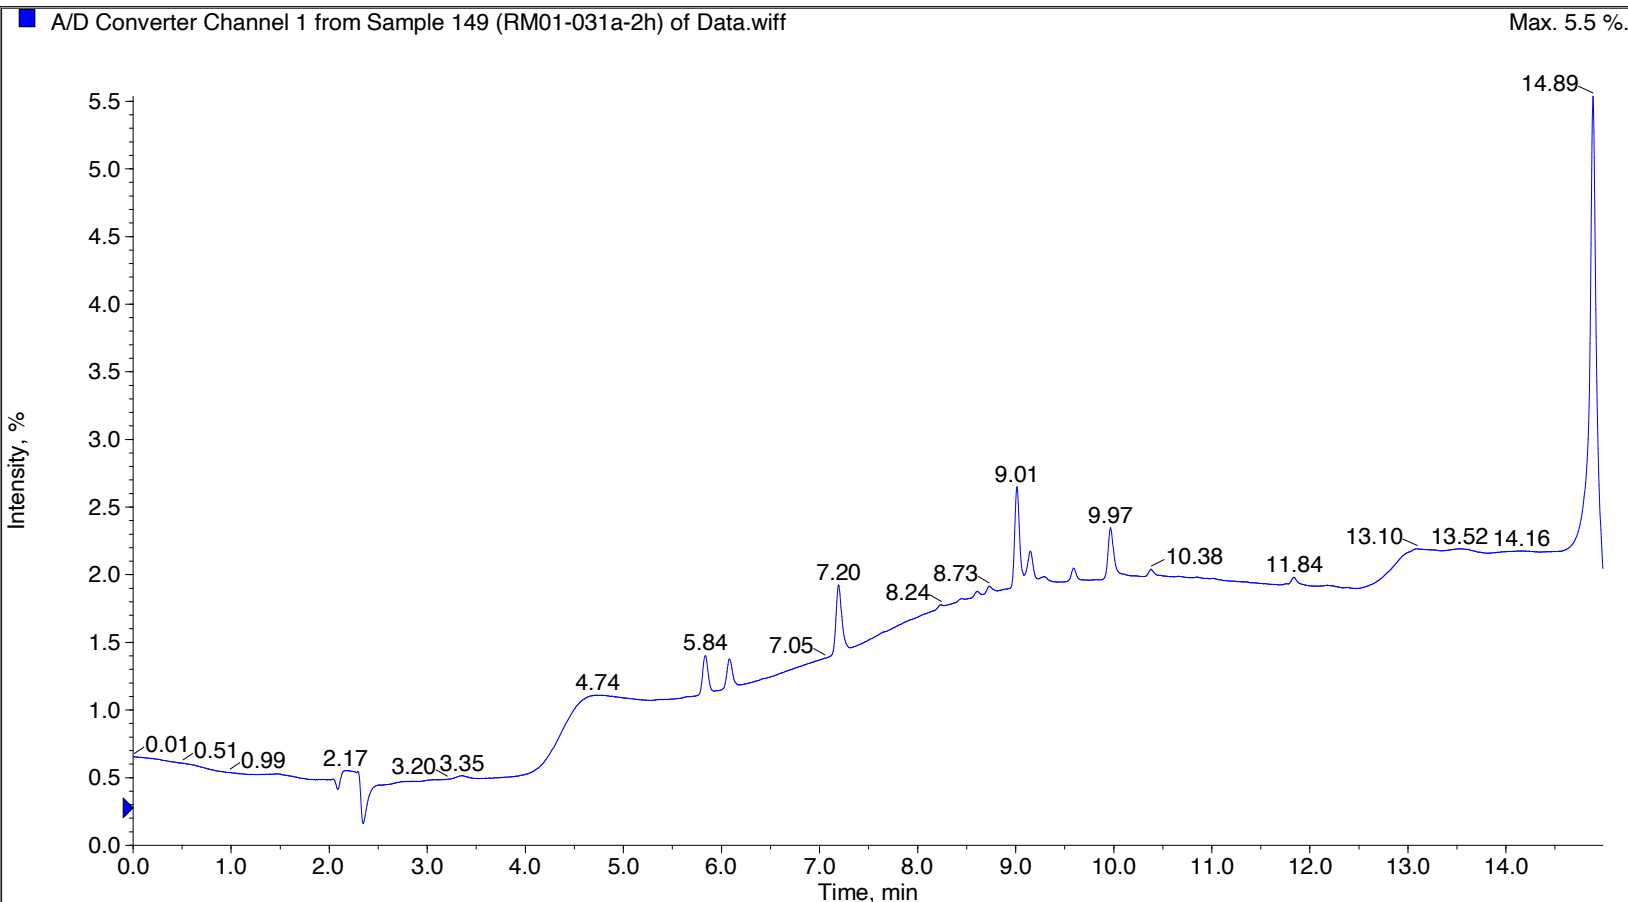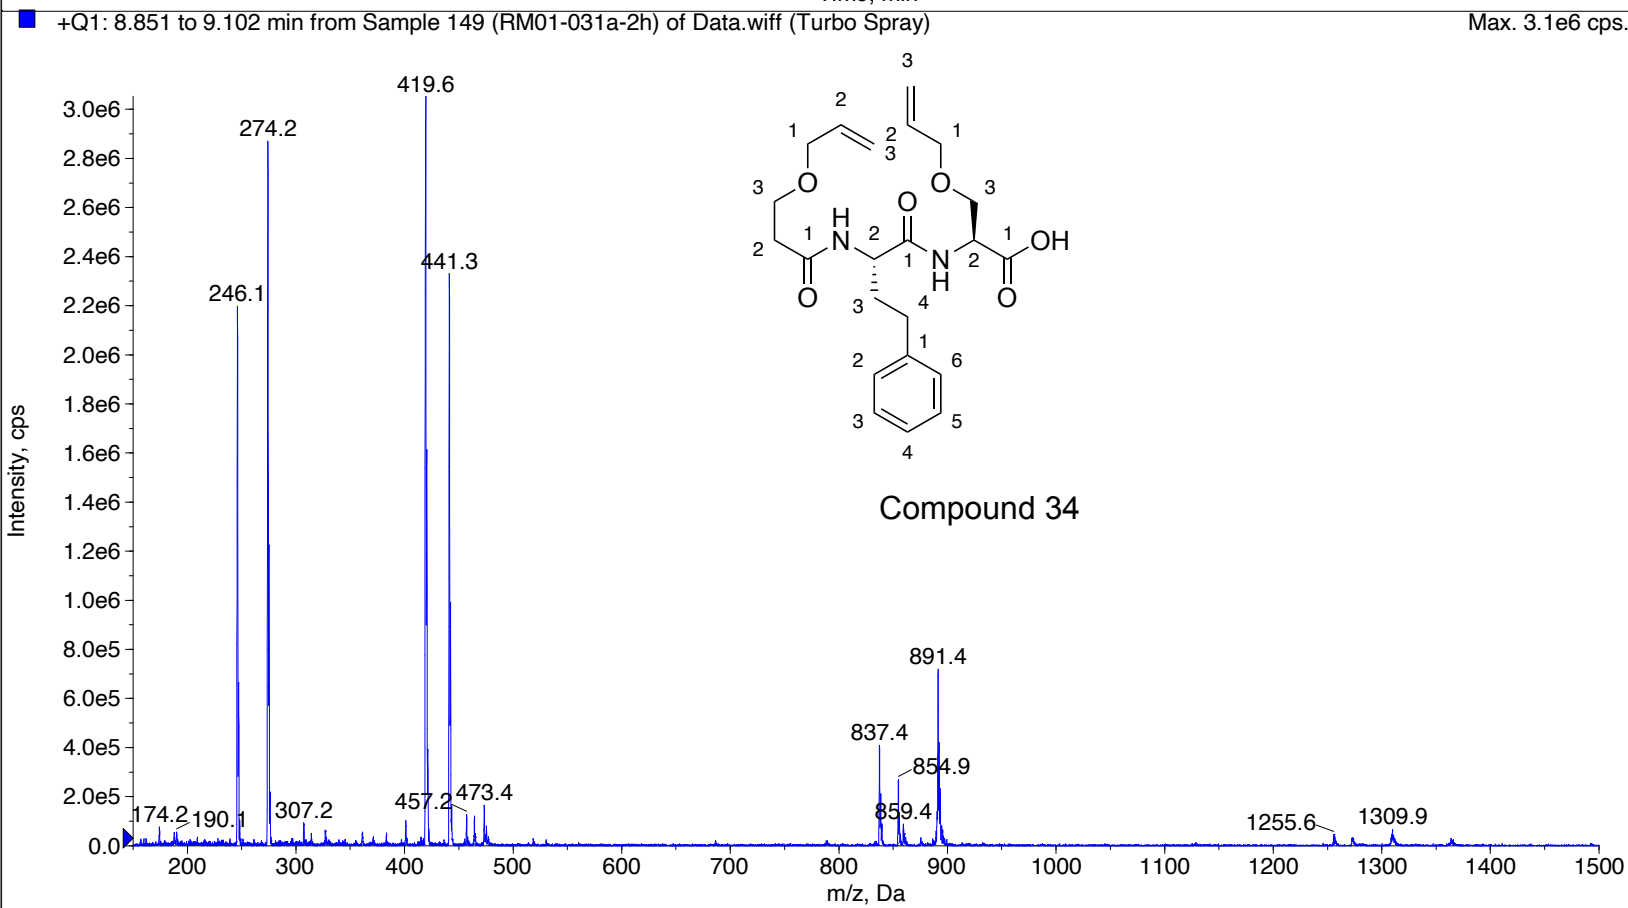

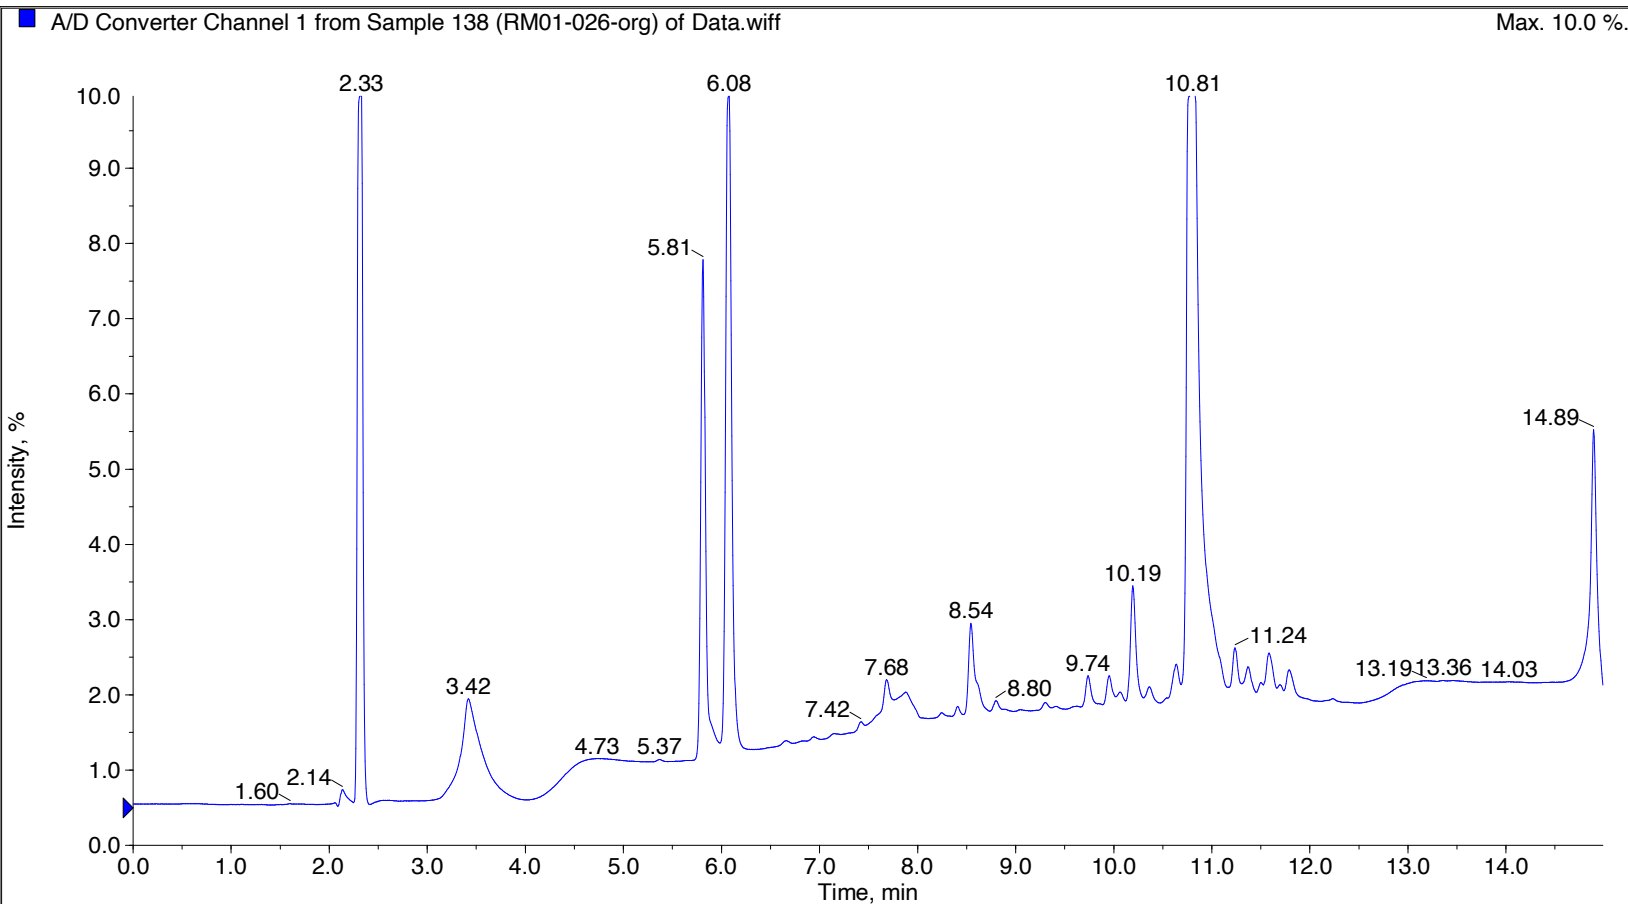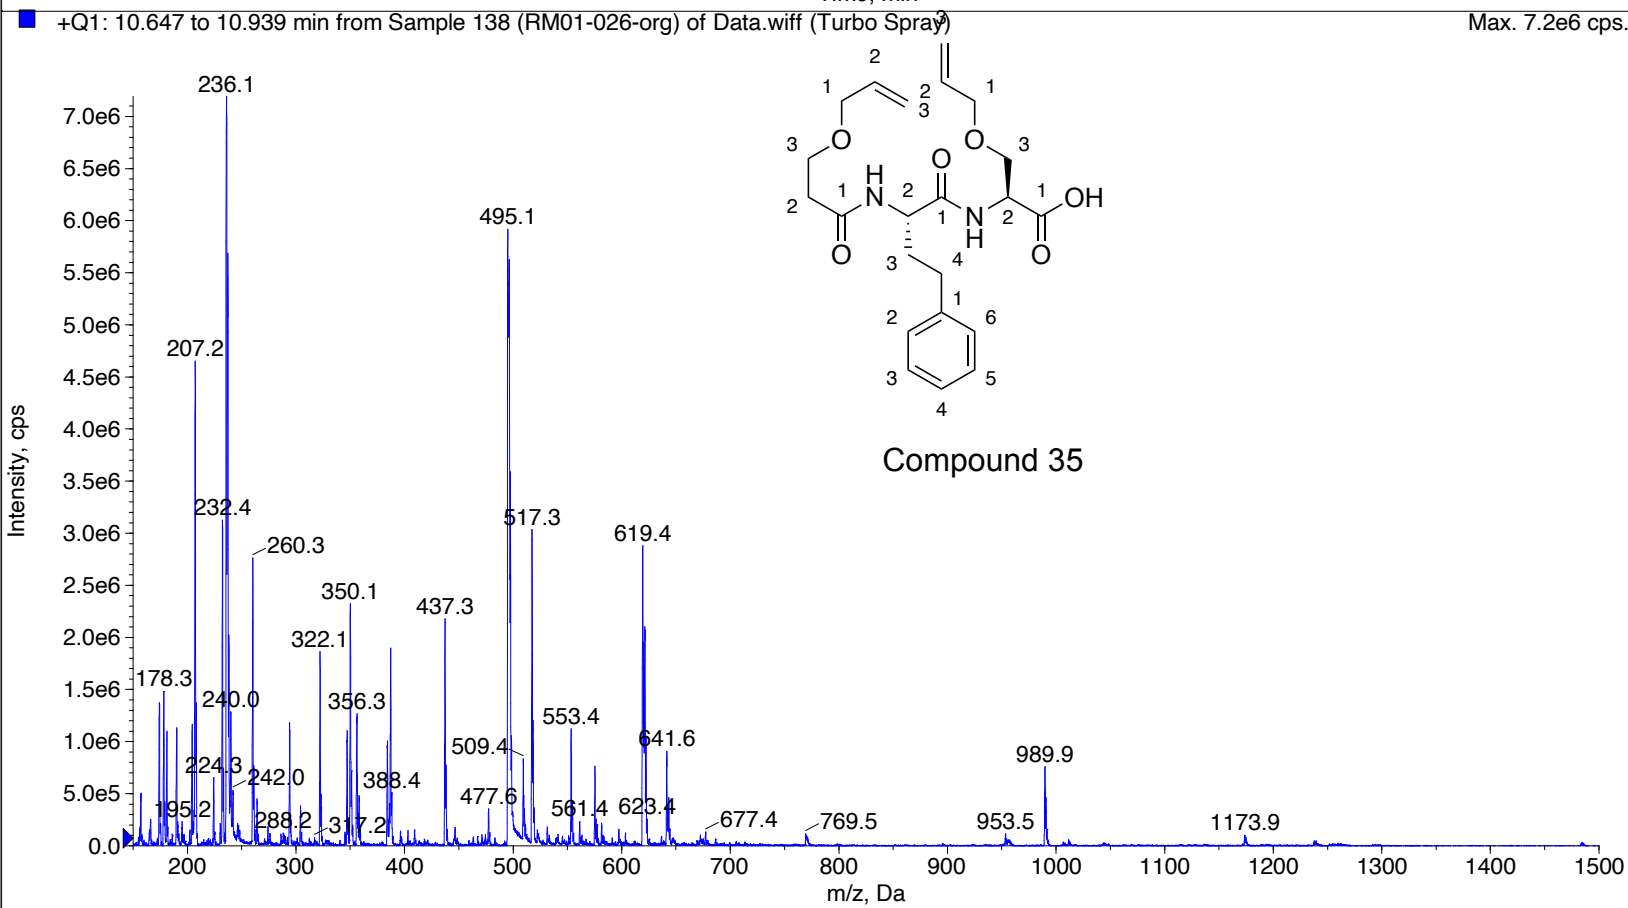



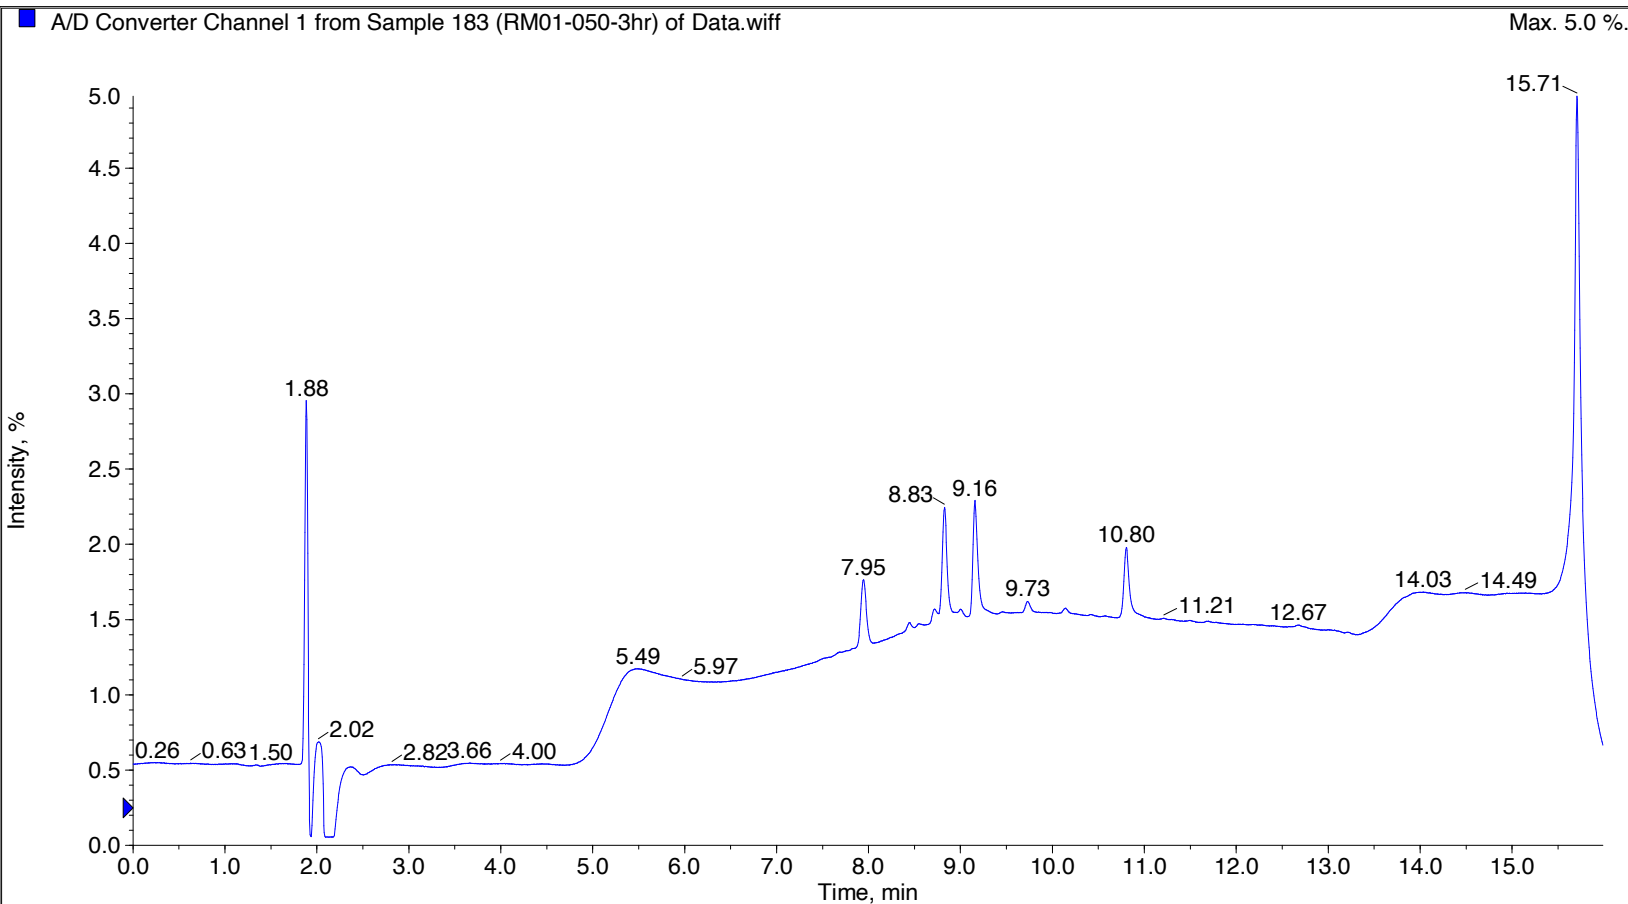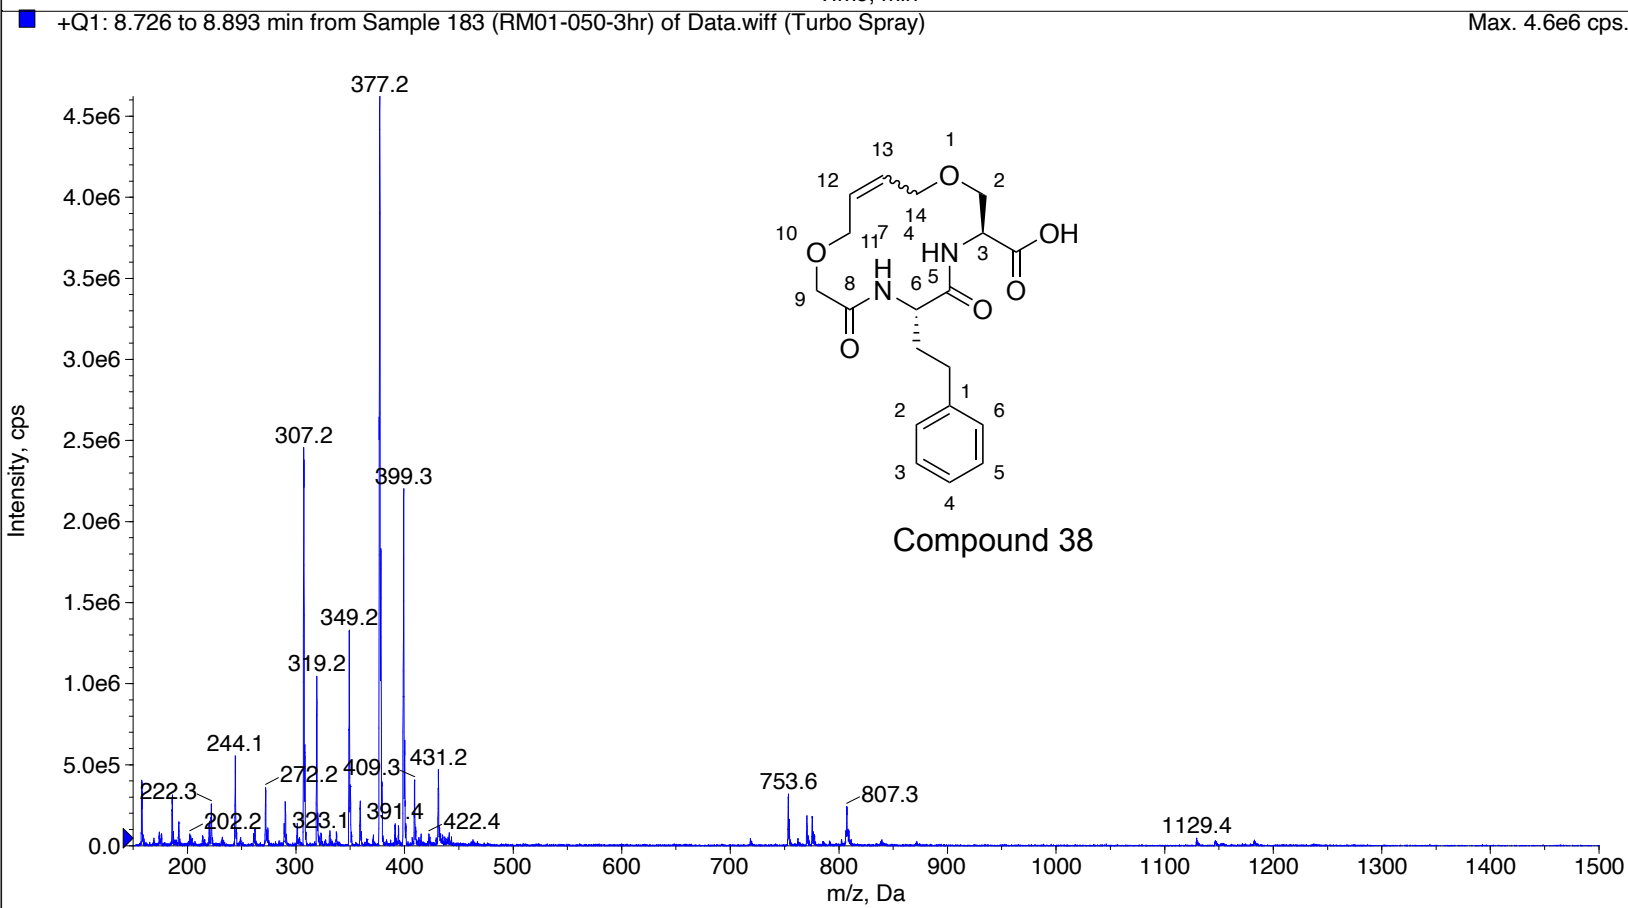

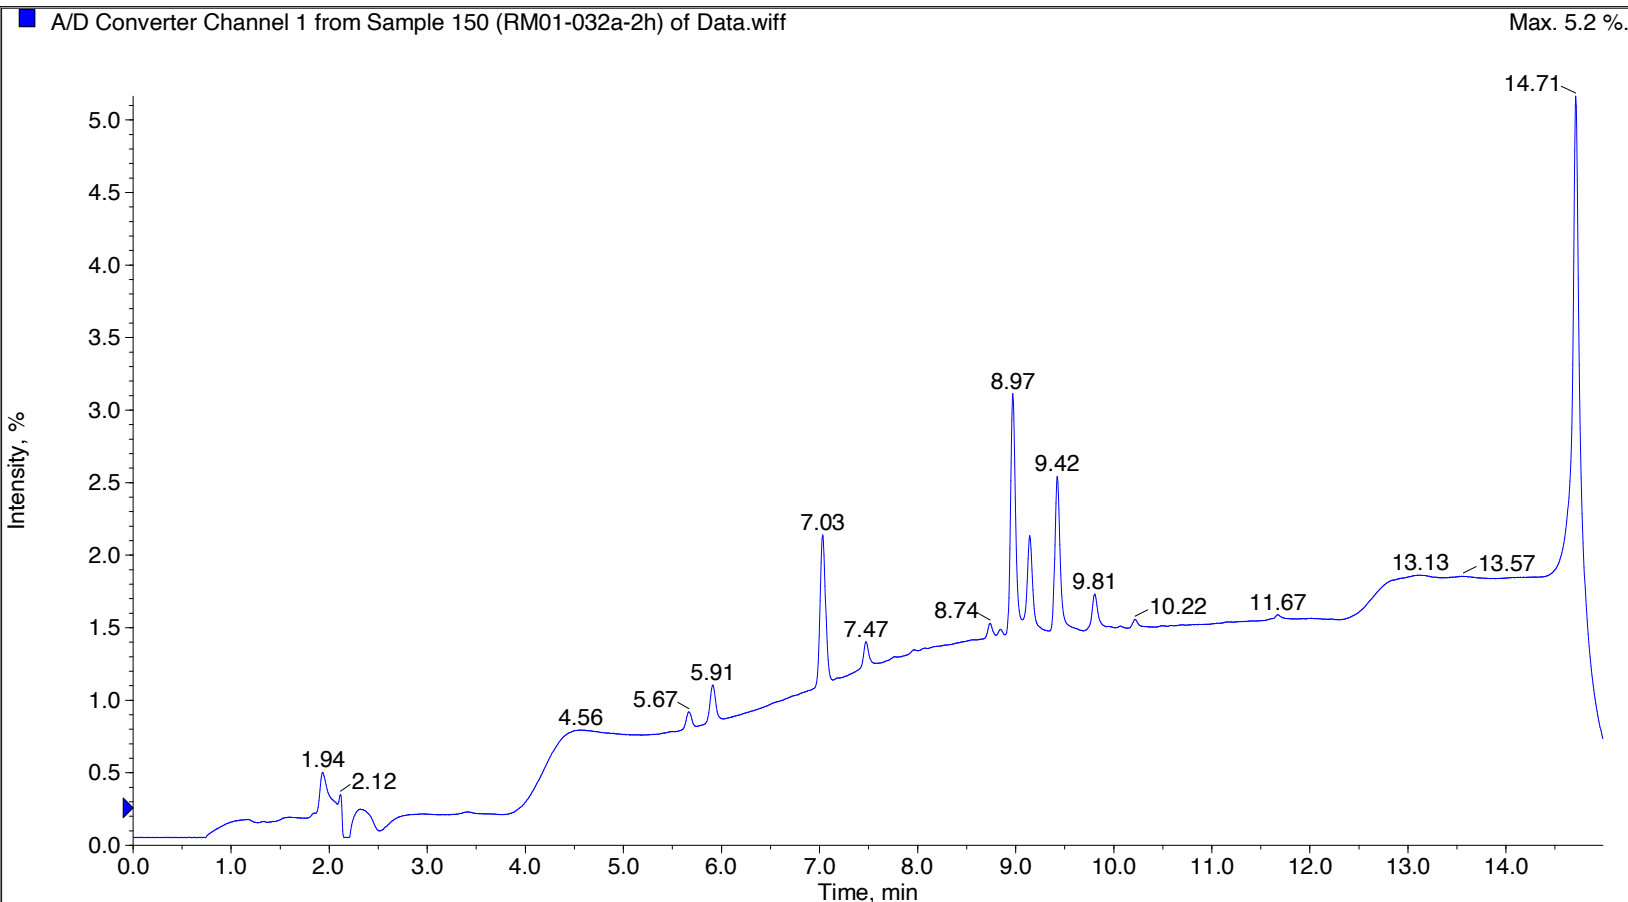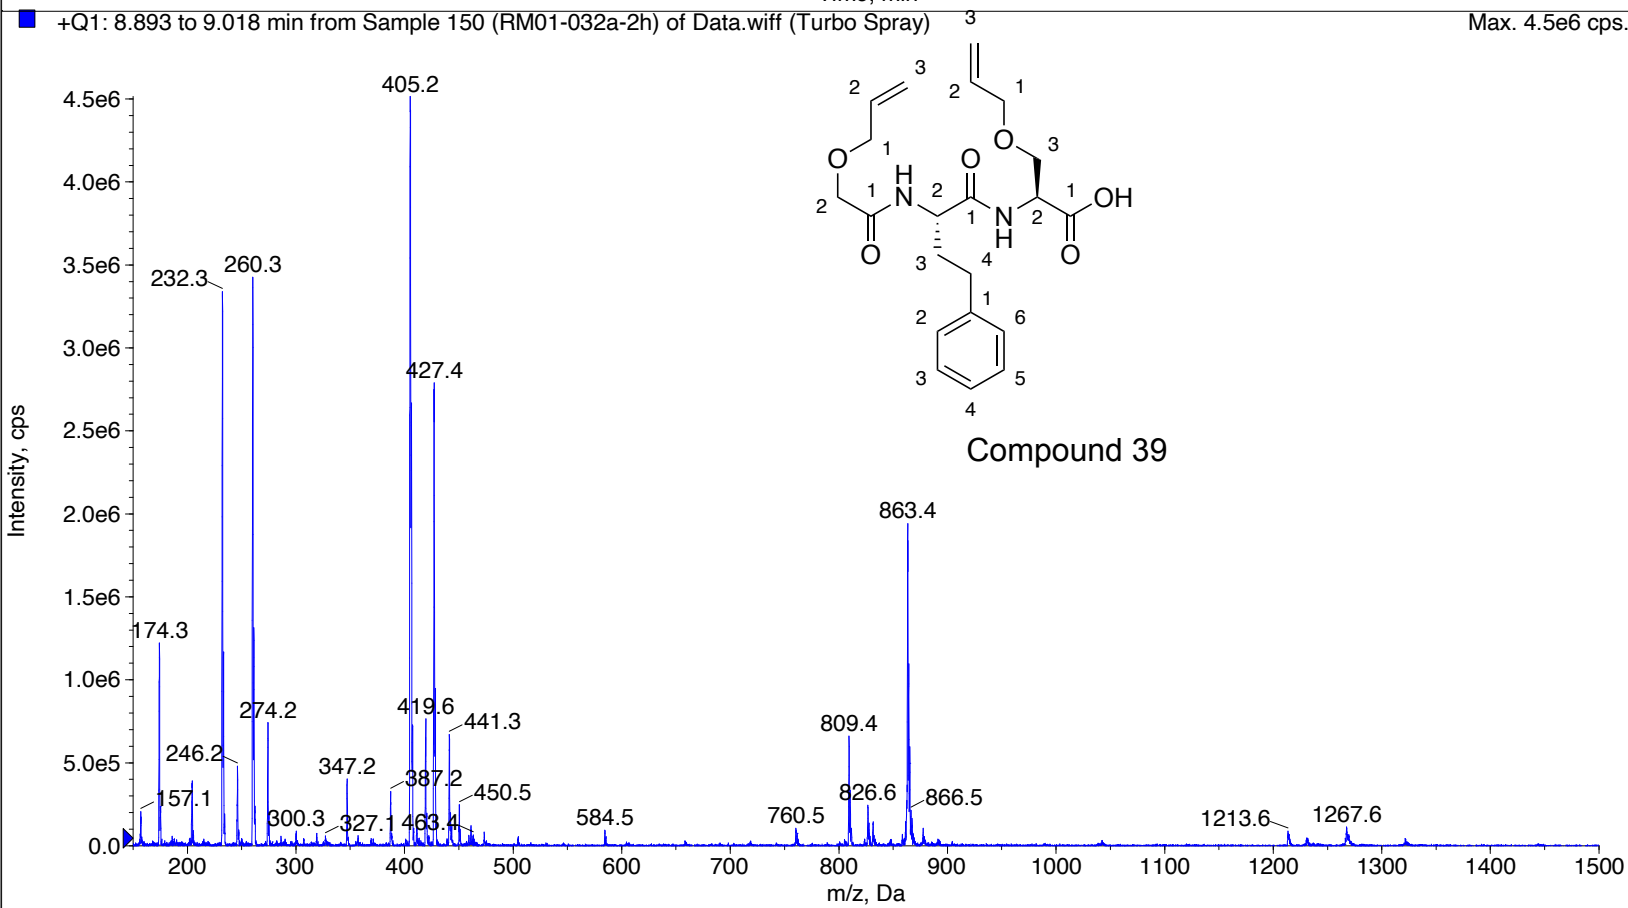

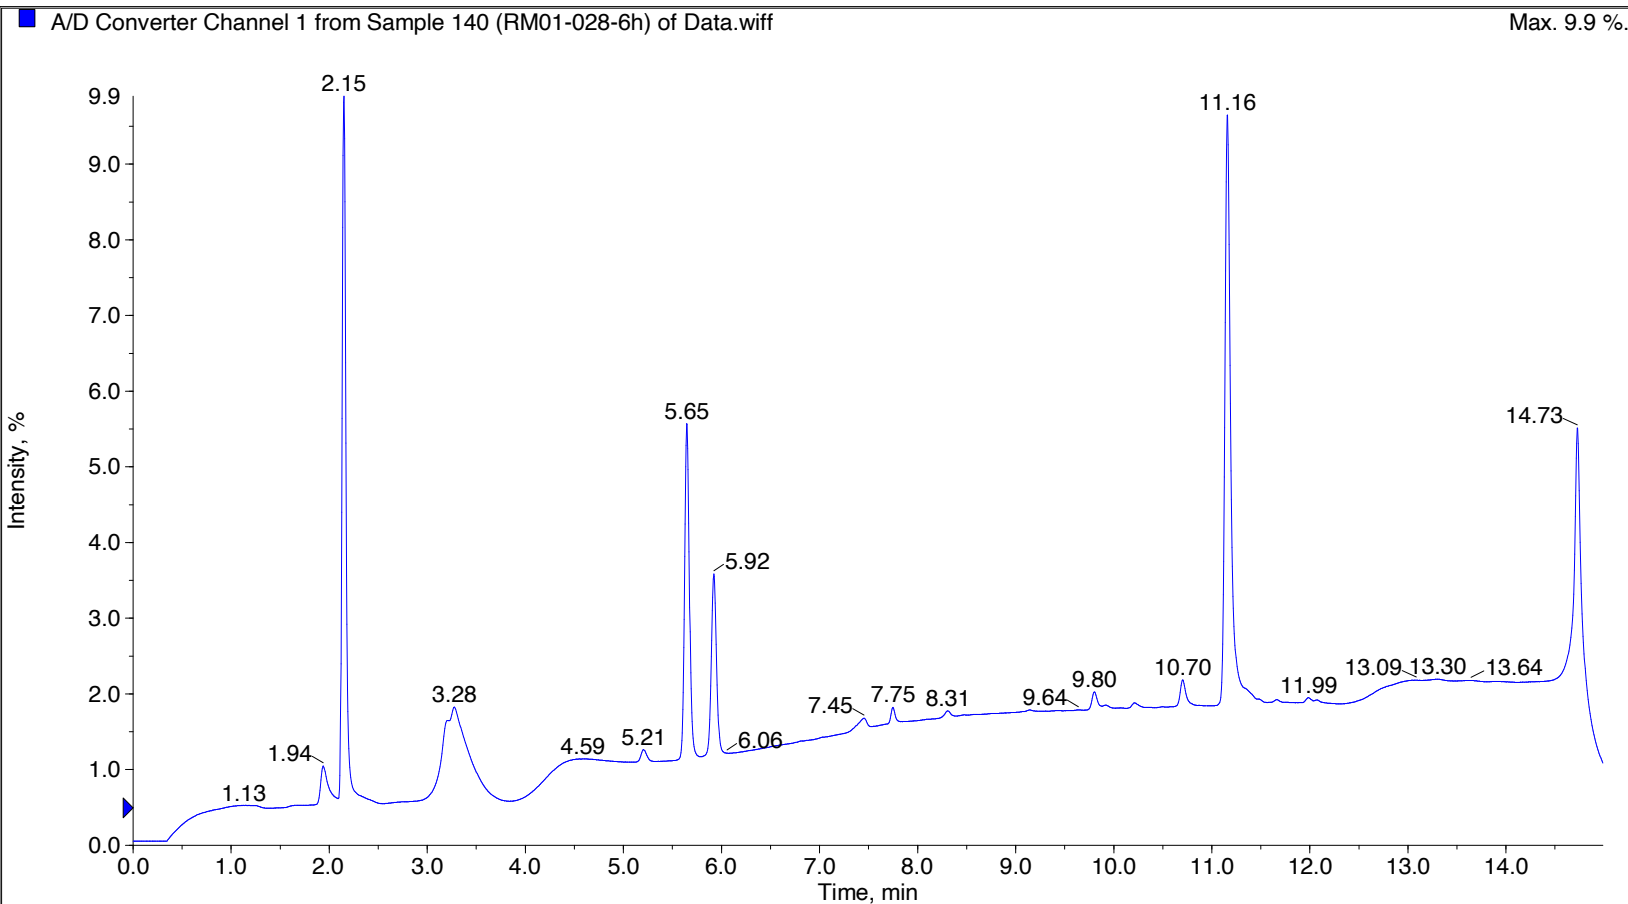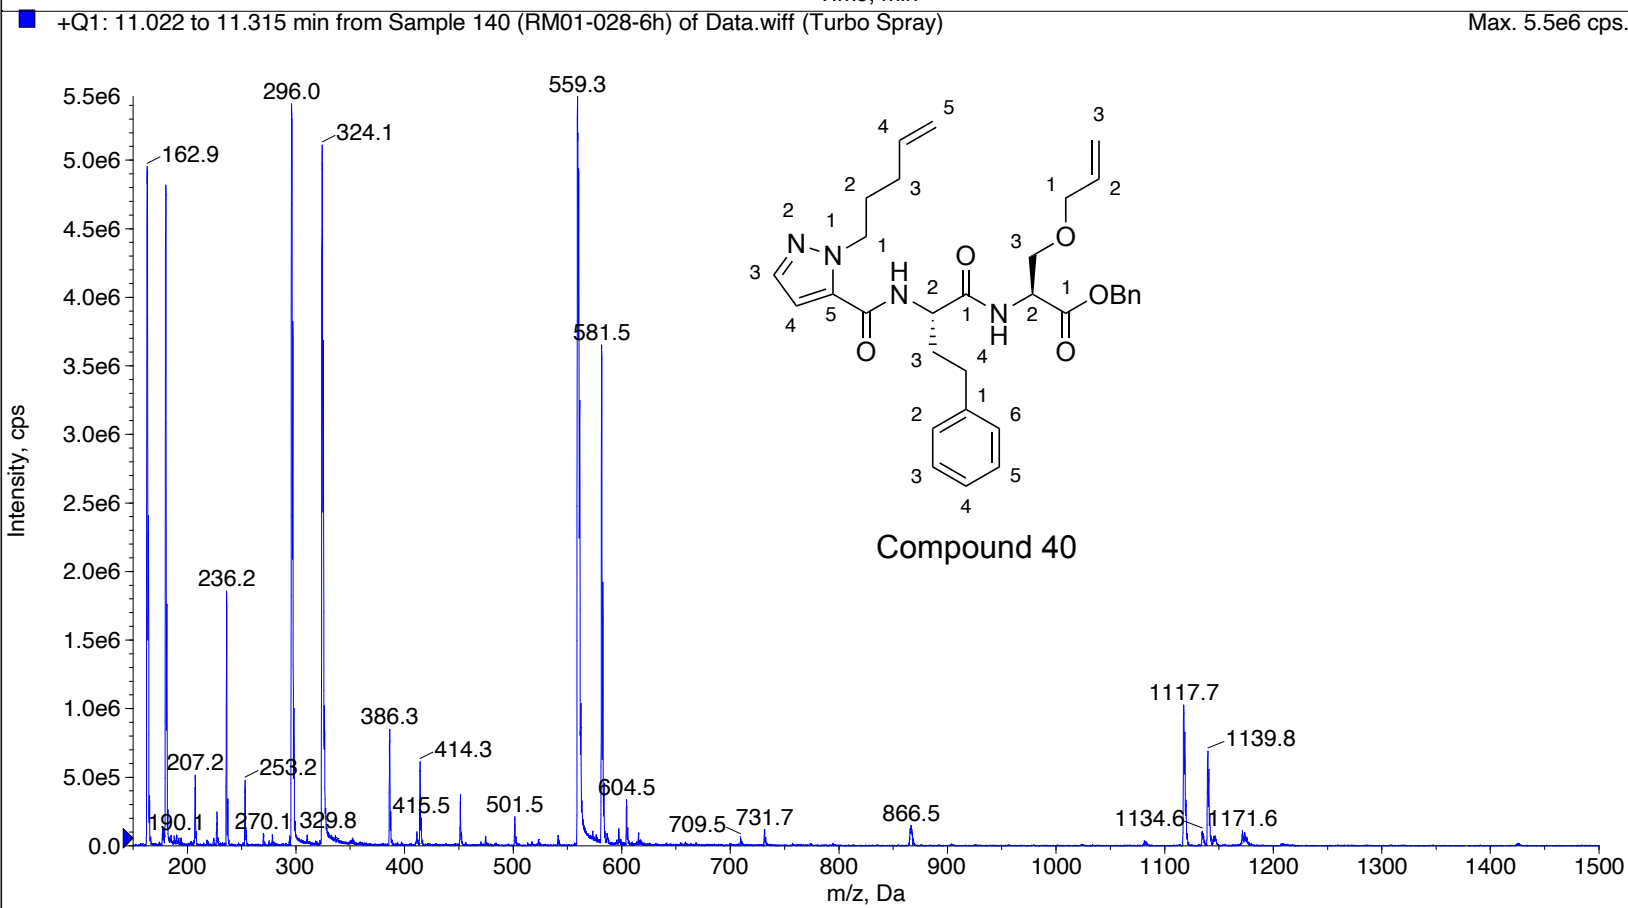

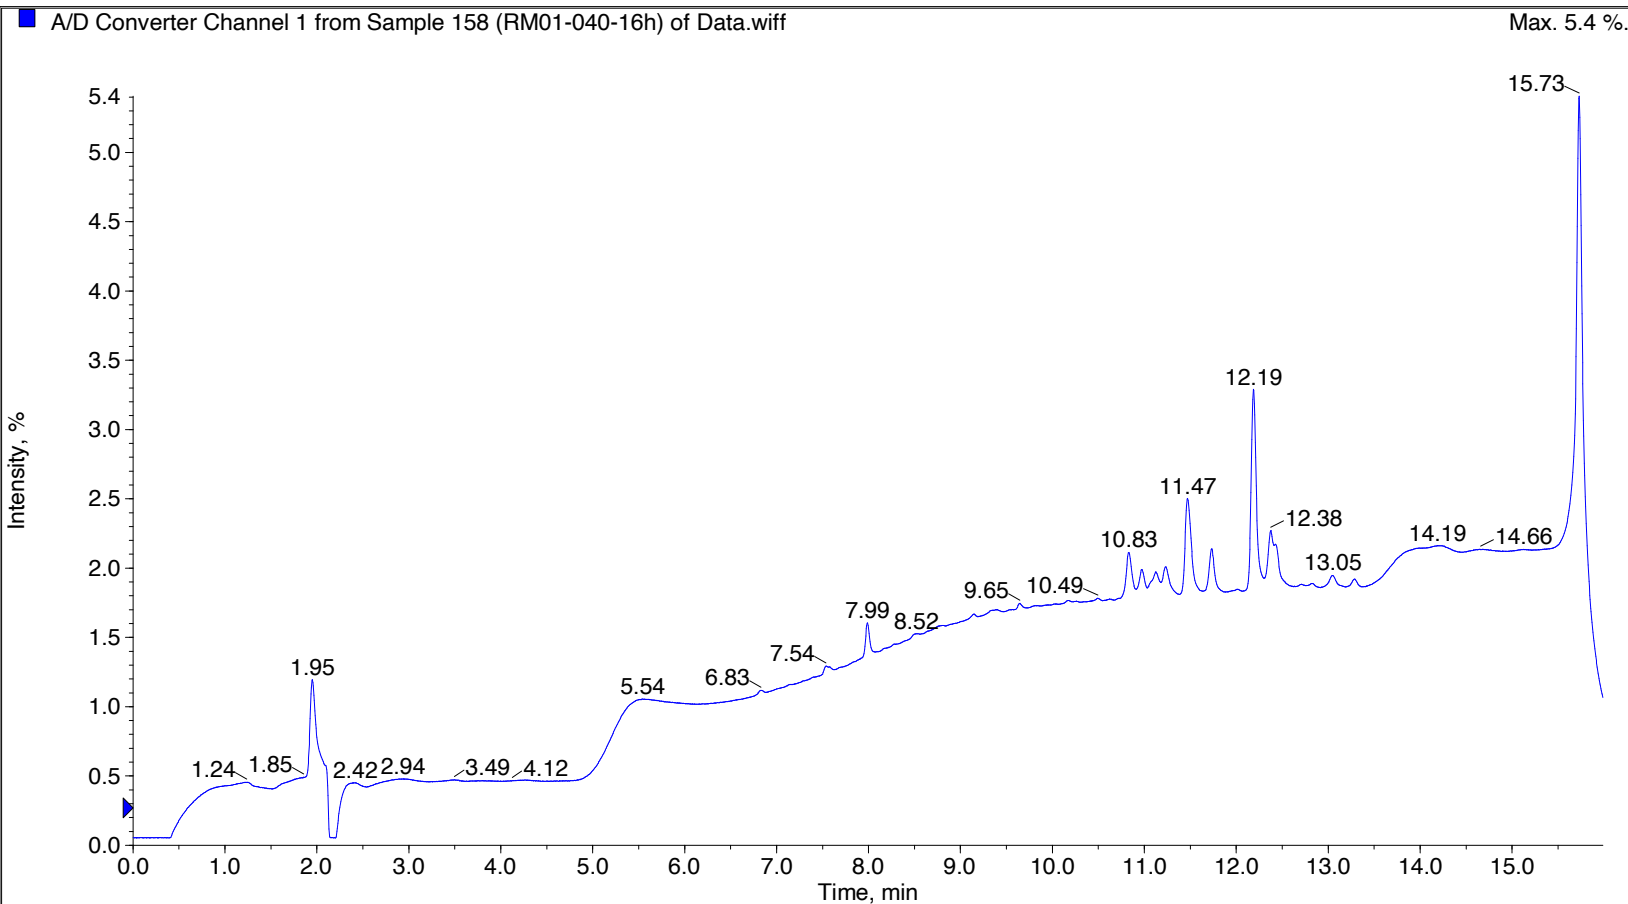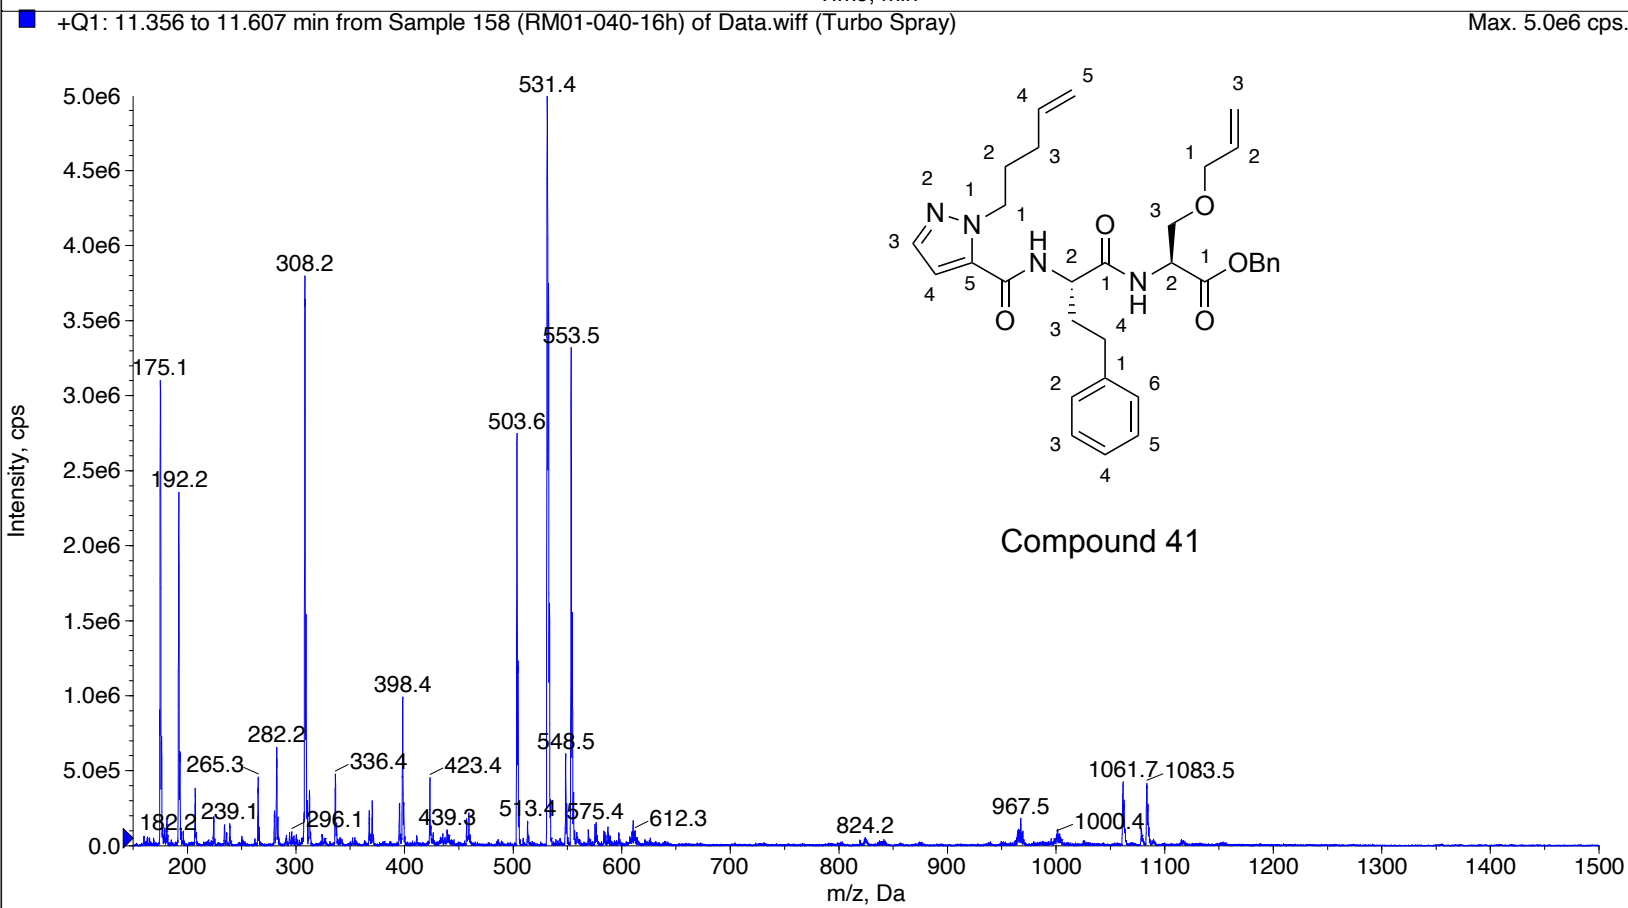

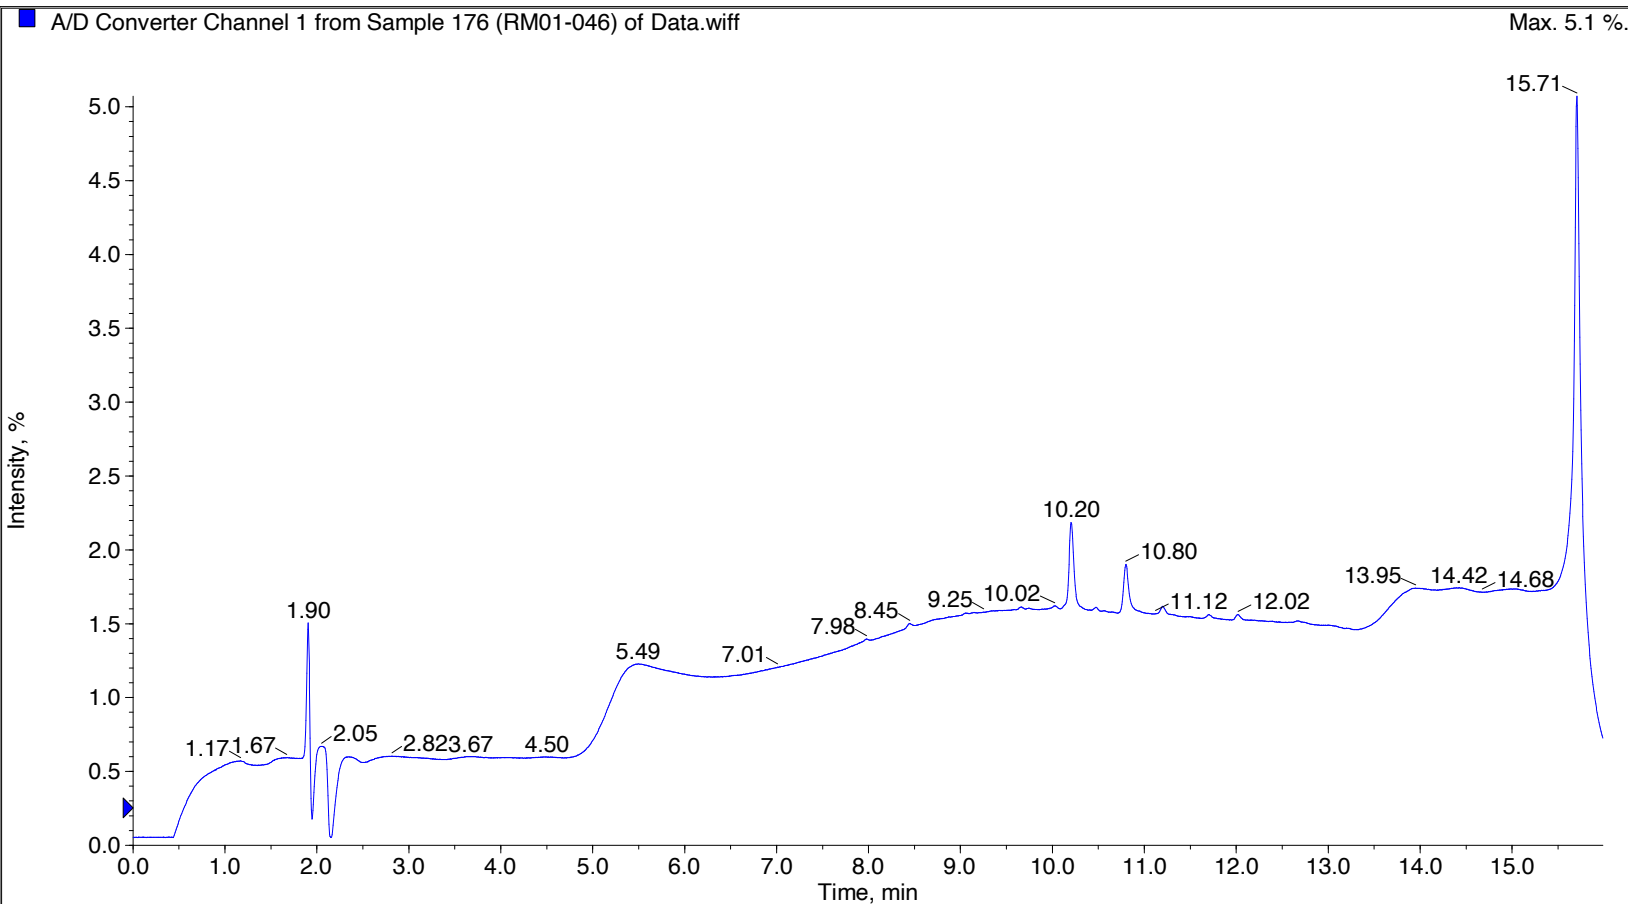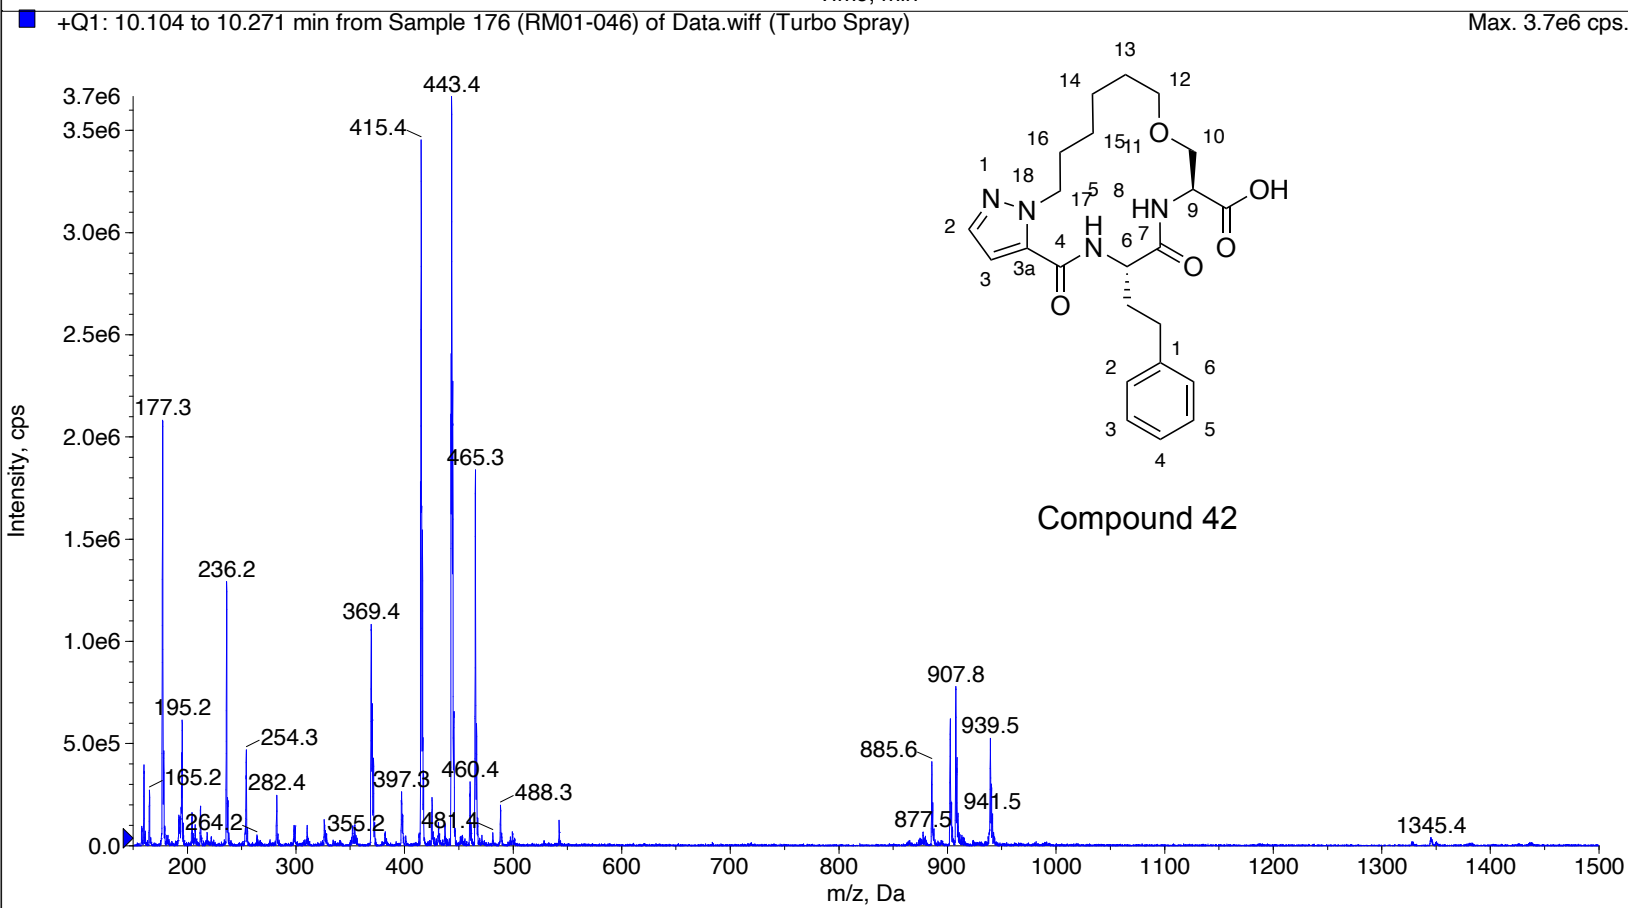

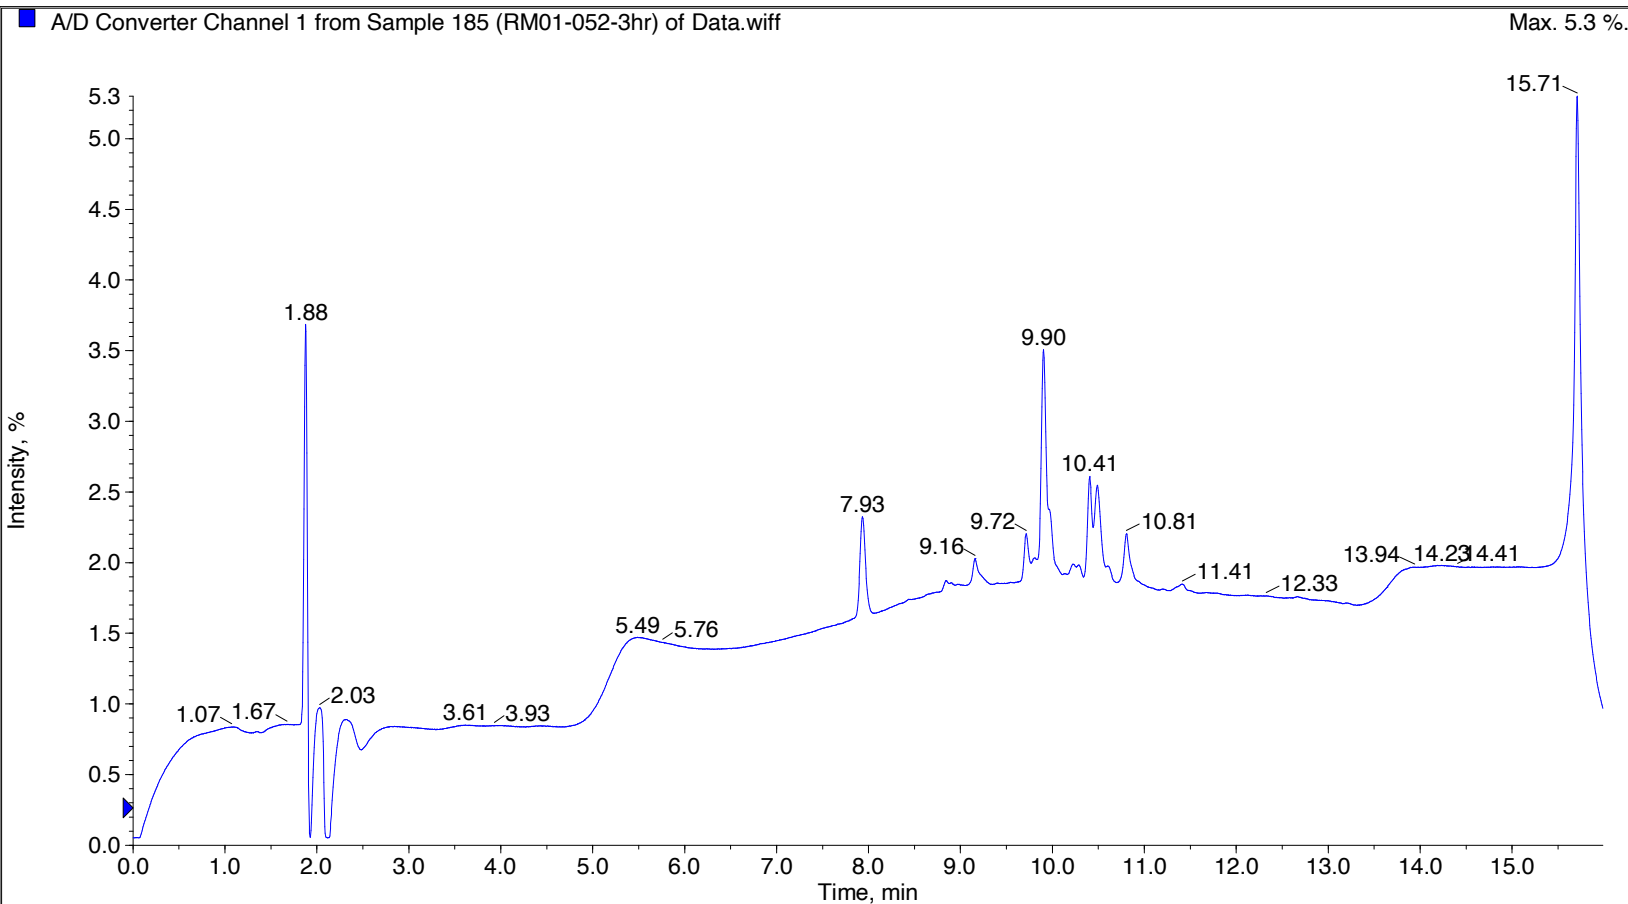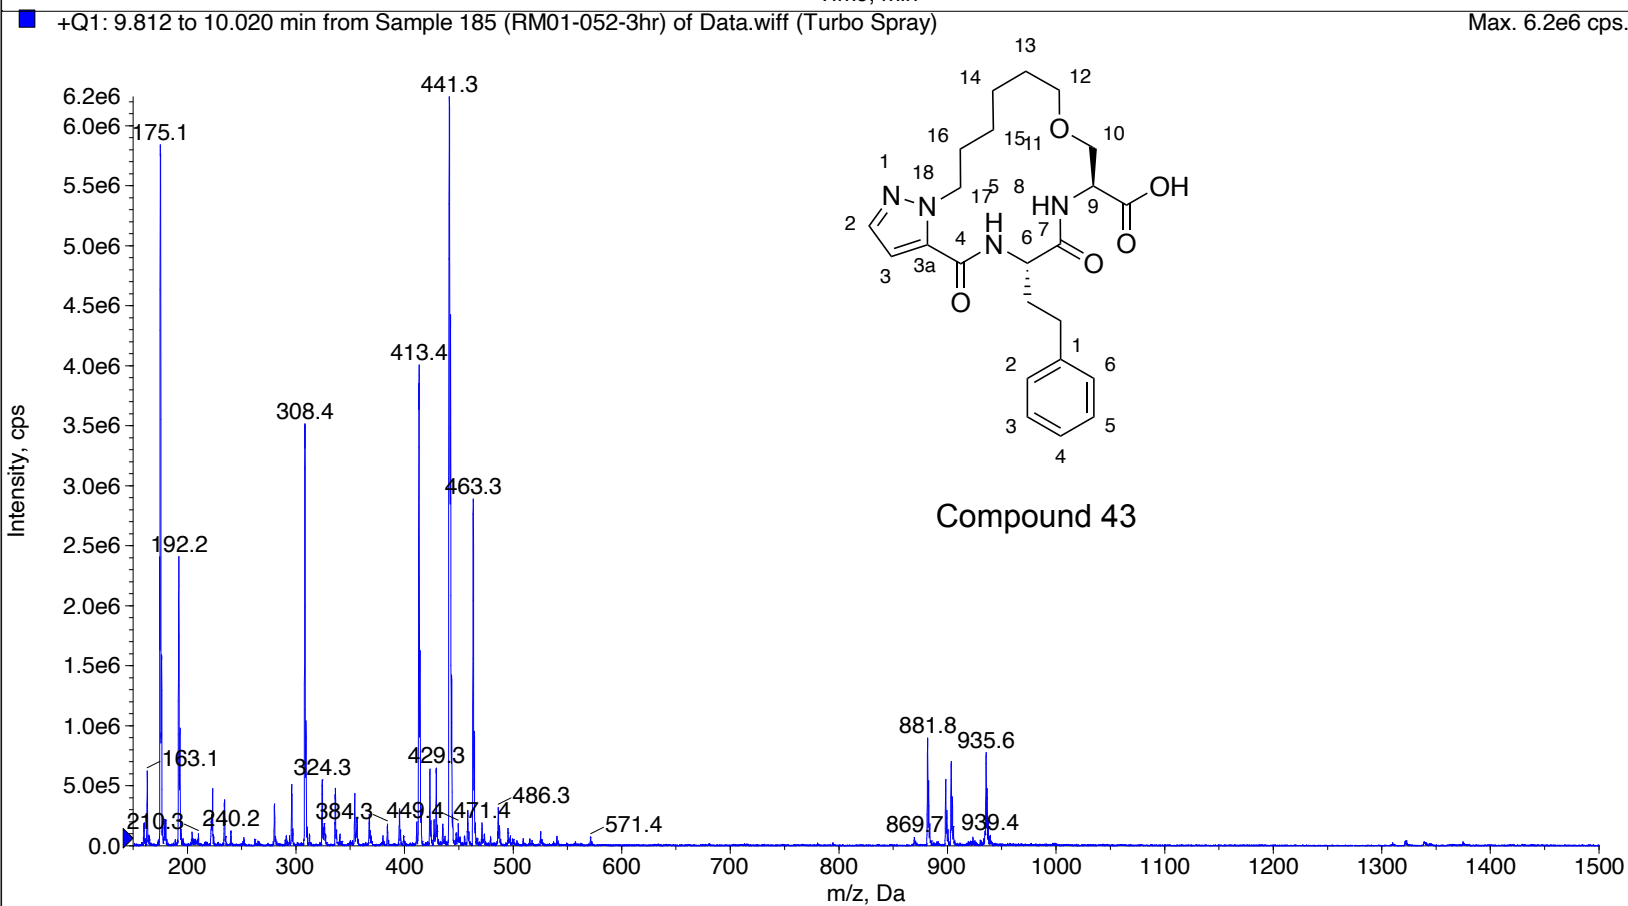

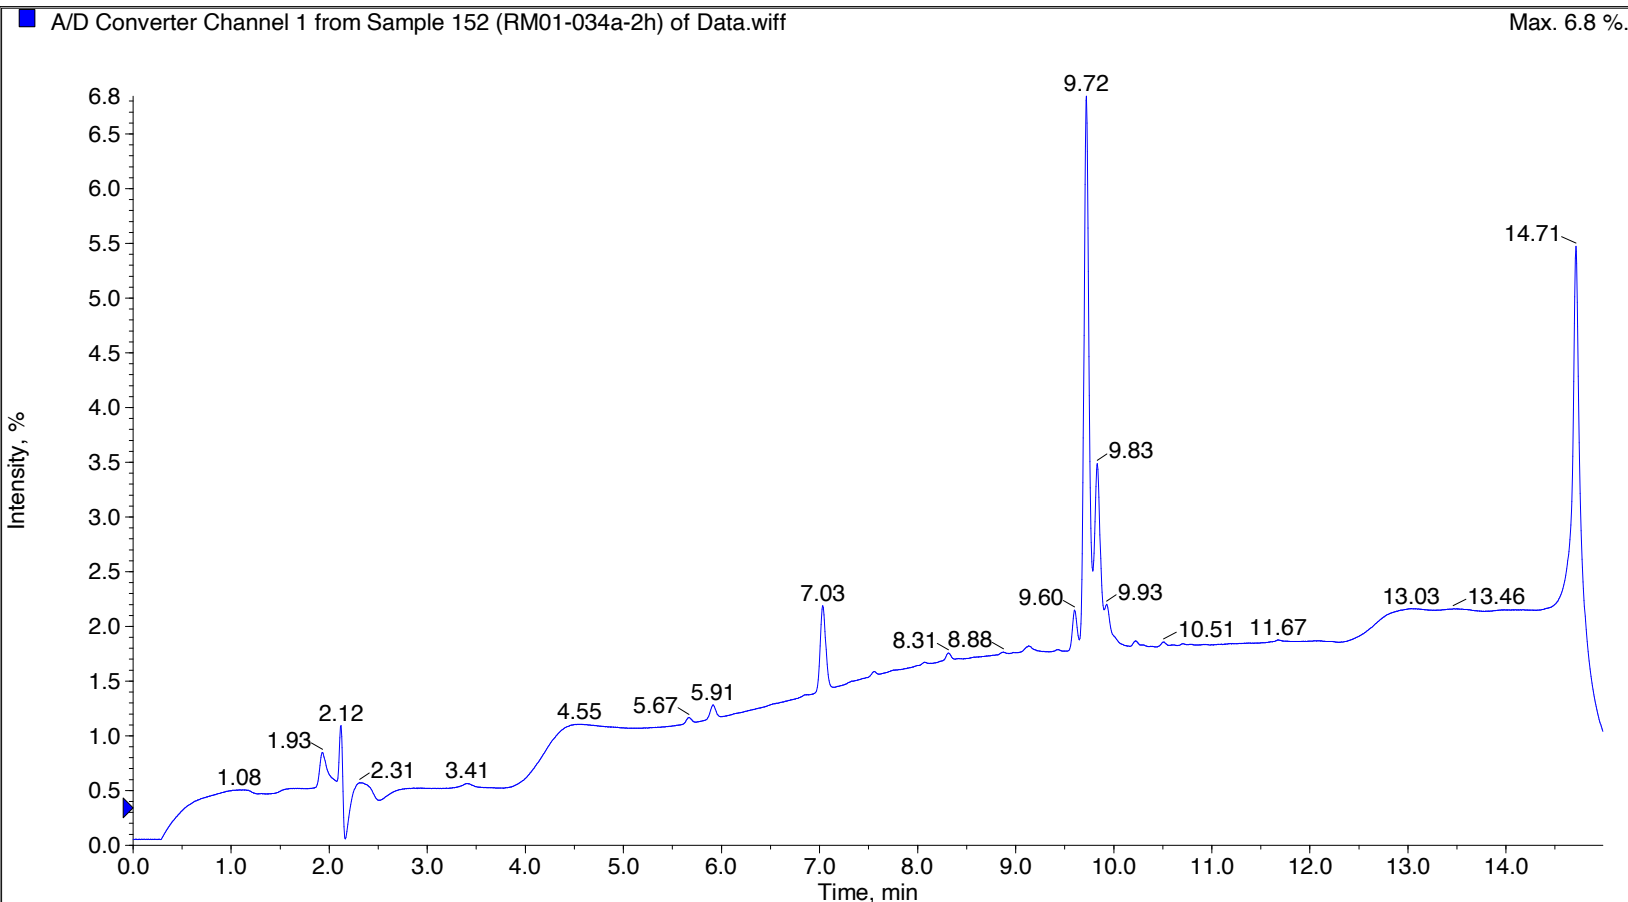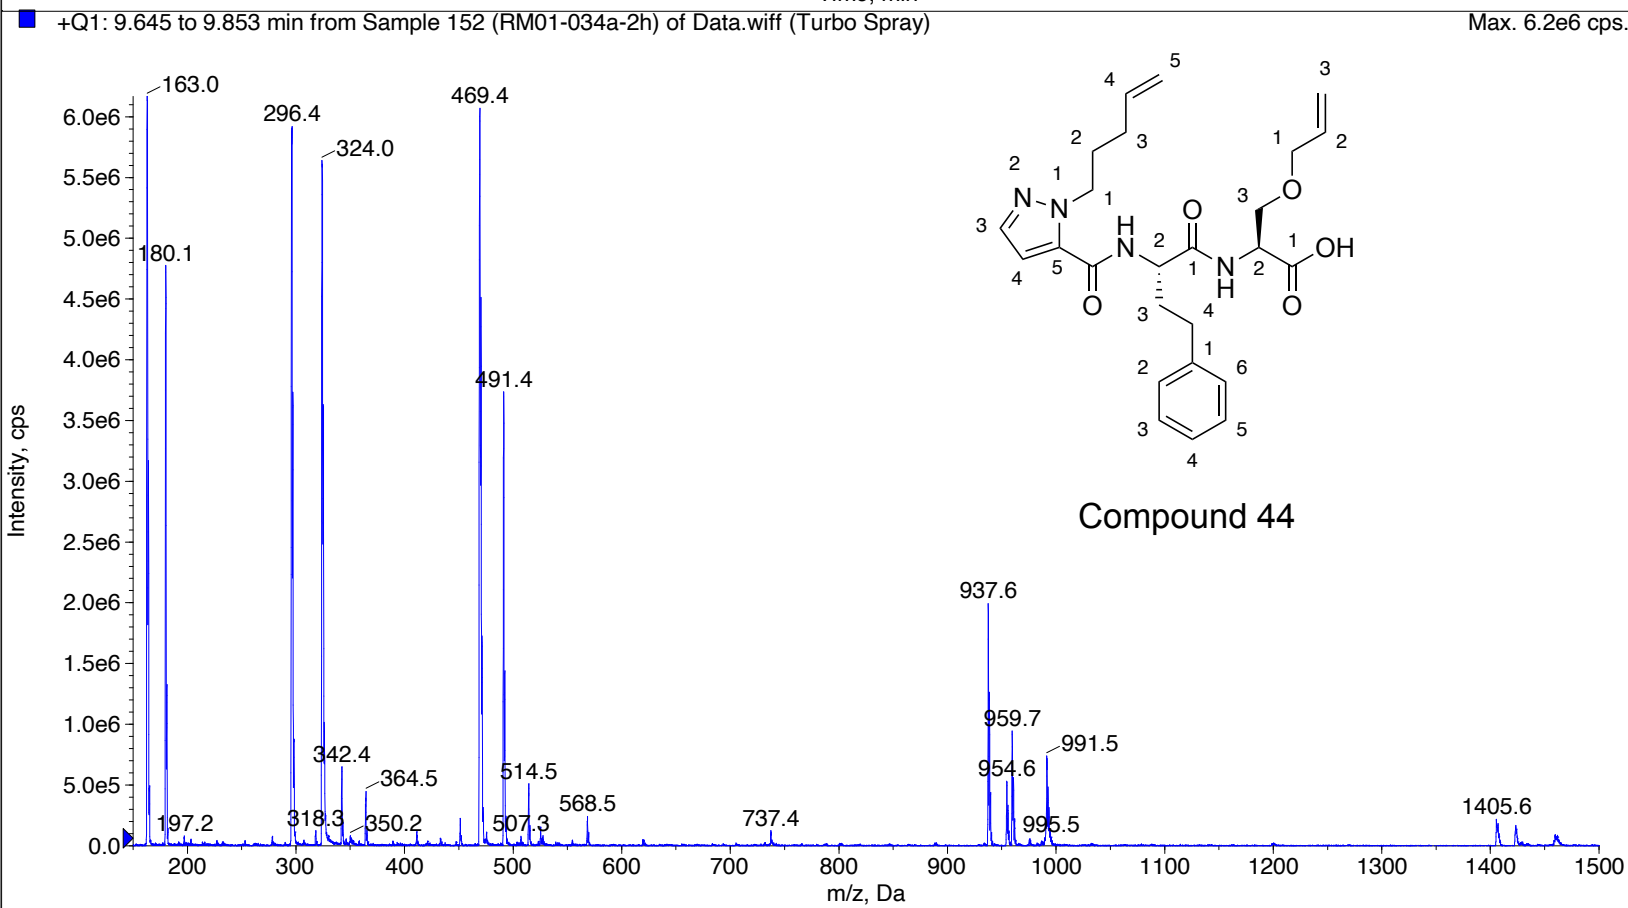

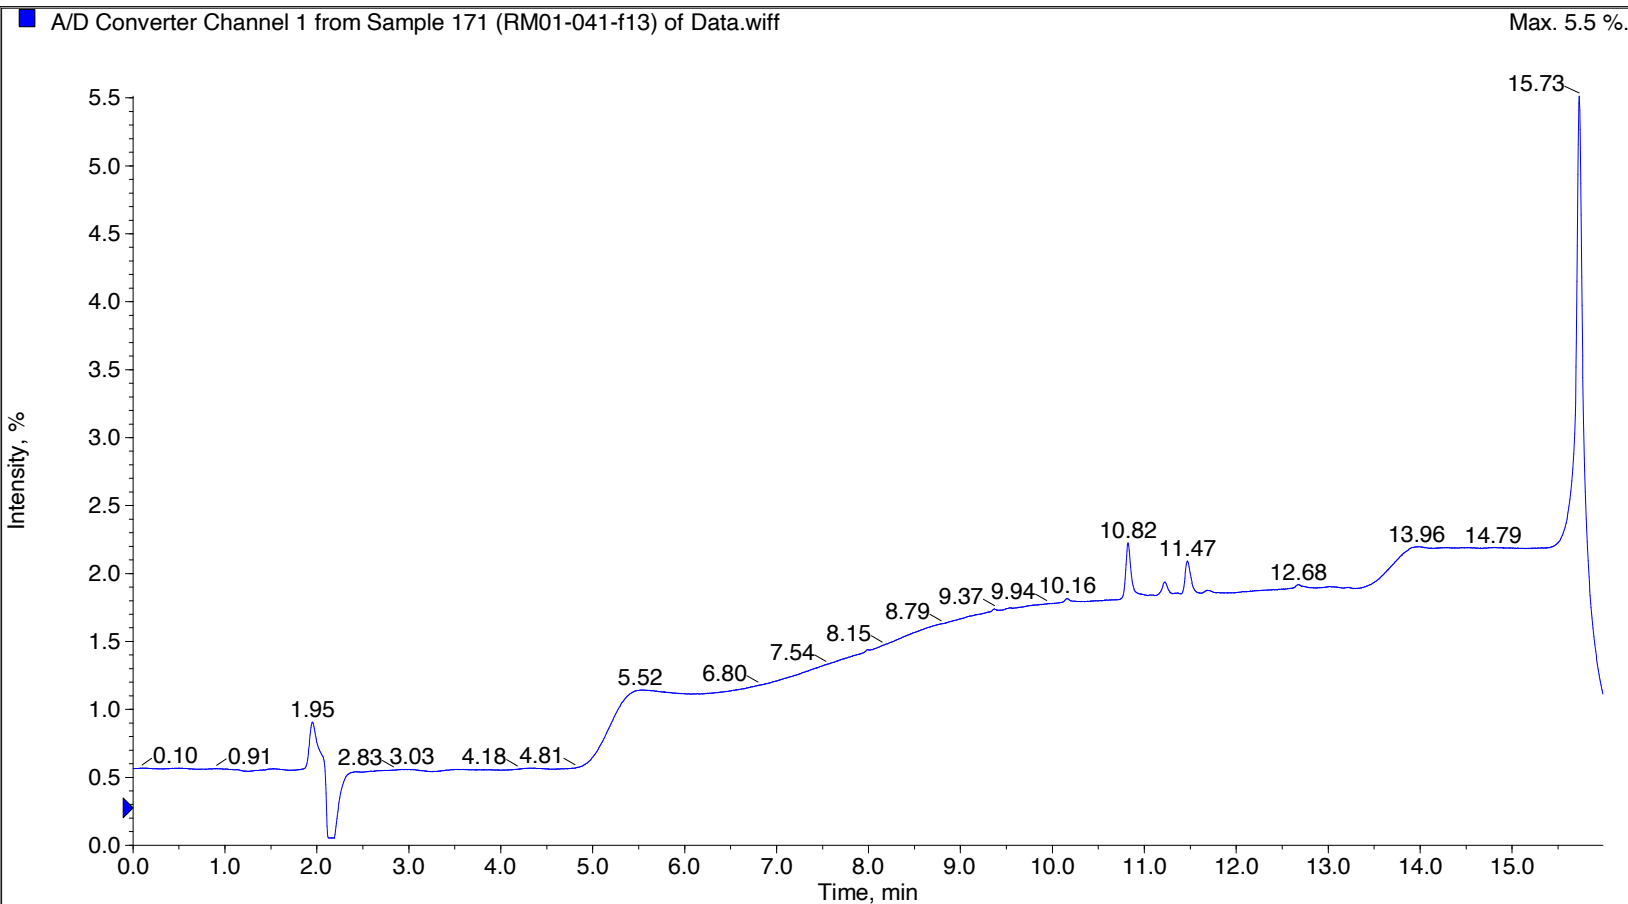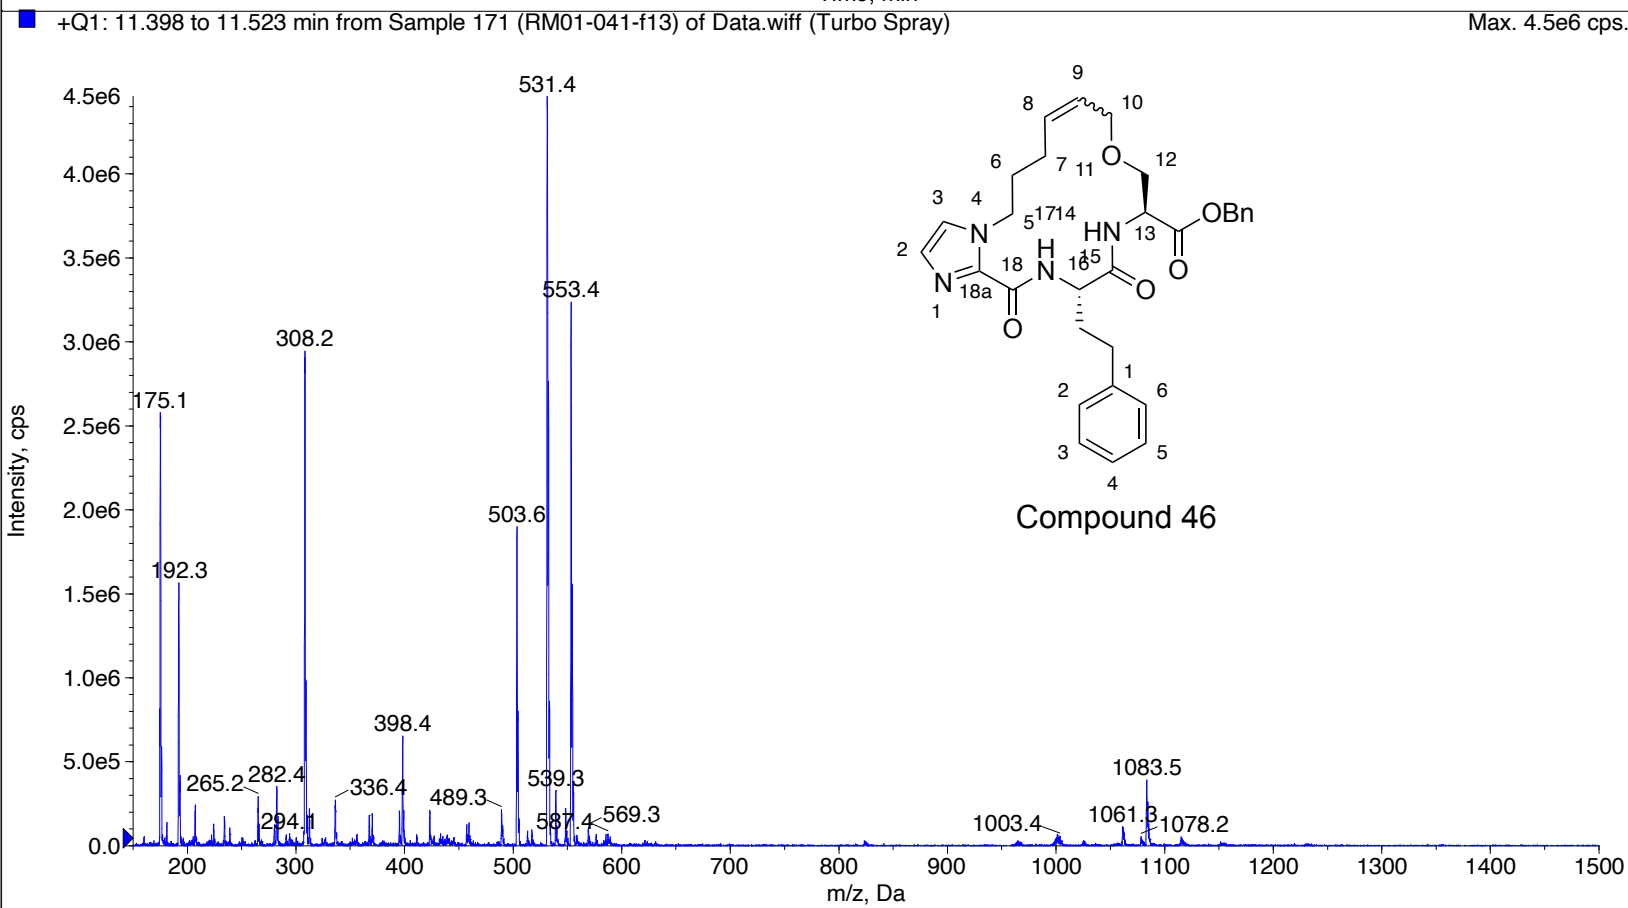



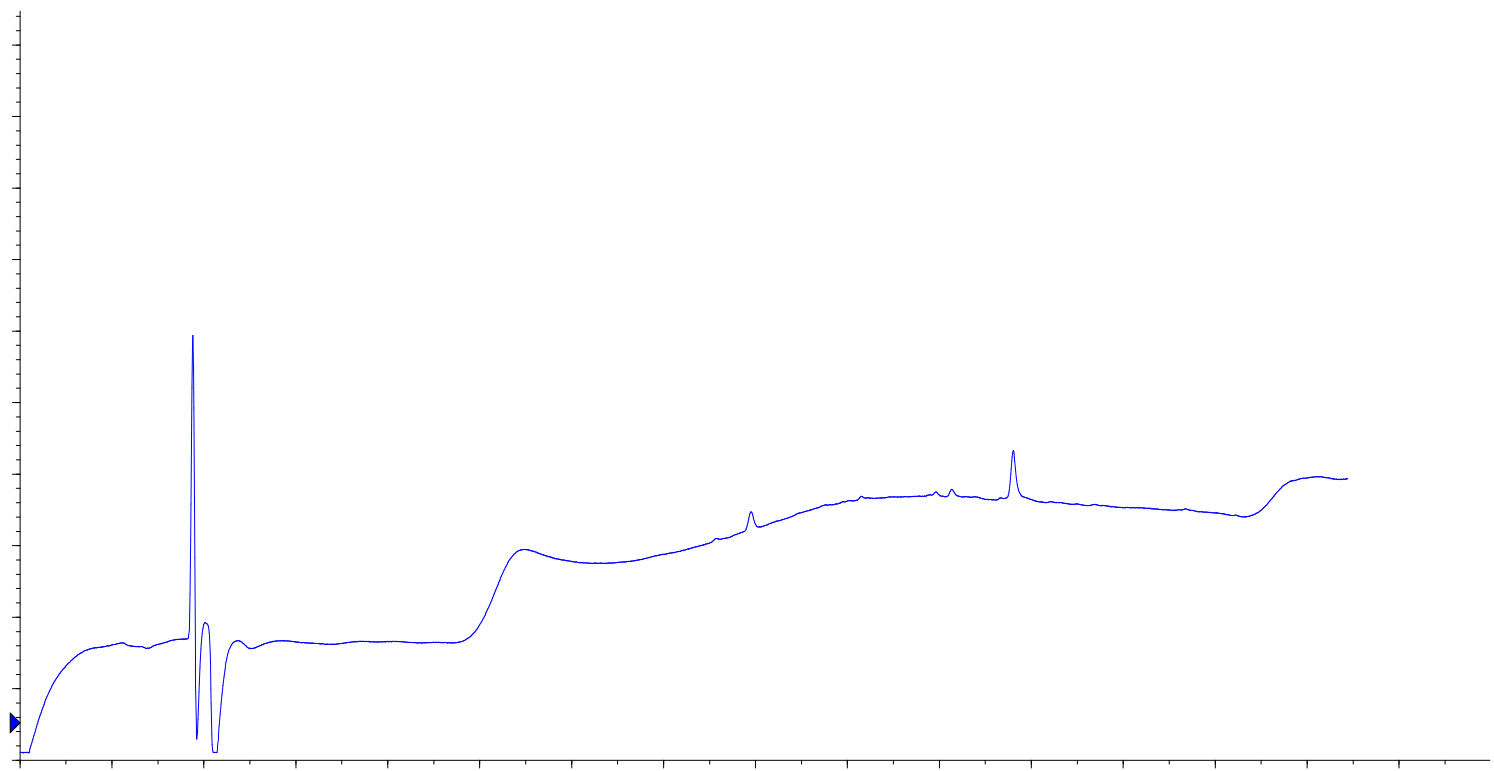

+Q1: 10.730 to 10.855 min from Sample 181 (RM01-053-3hr) of Data.wiff (Turbo Spray)

Max. 1.6e6 cps.

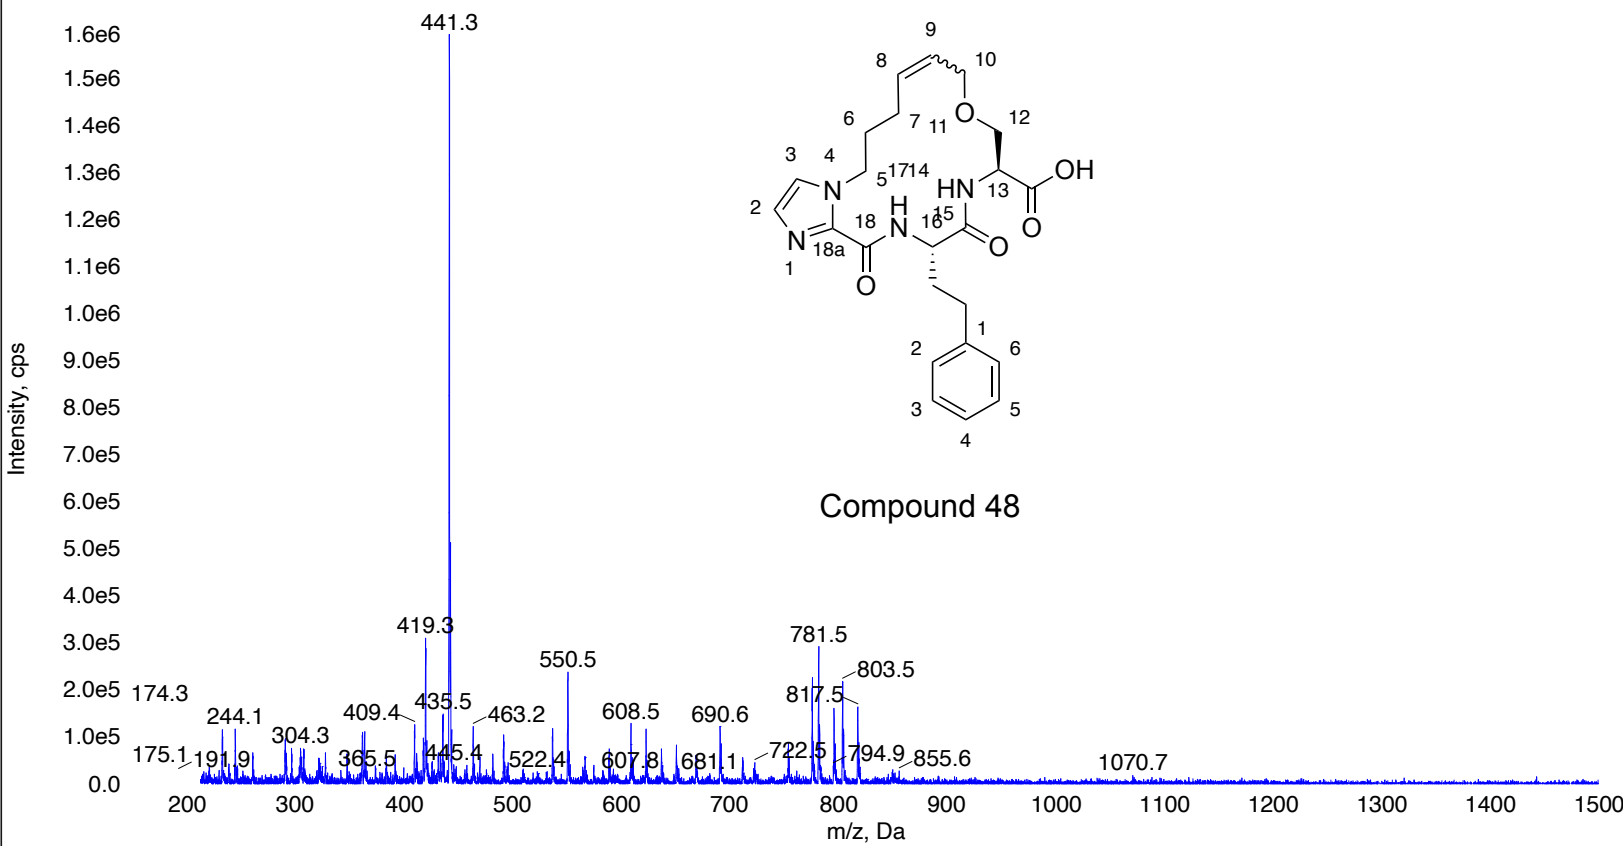

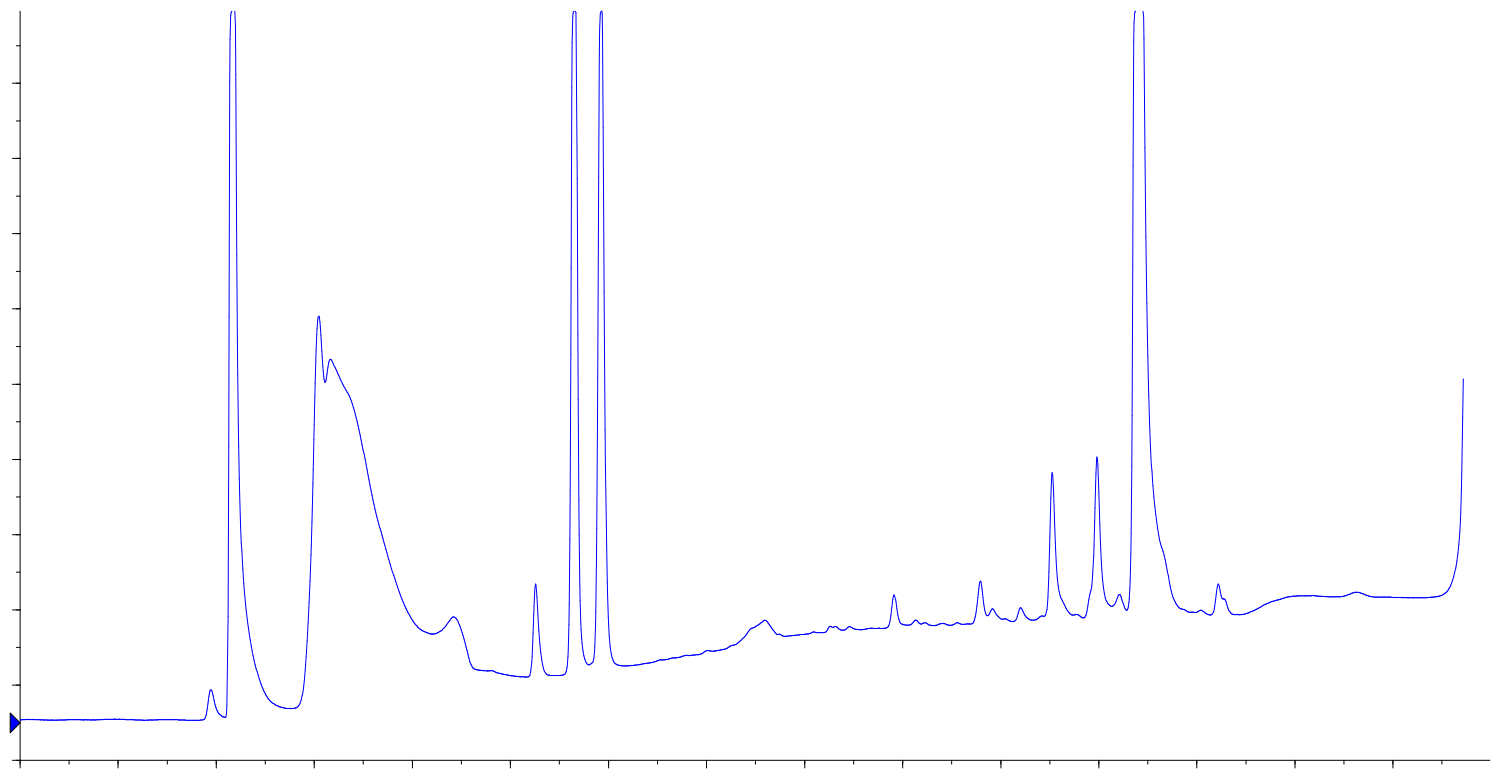

+Q1: 11.315 to 11.523 min from Sample 139 (RM01-027-6h) of Data.wiff (Turbo Spray)

Max. 7.1e6 cps.

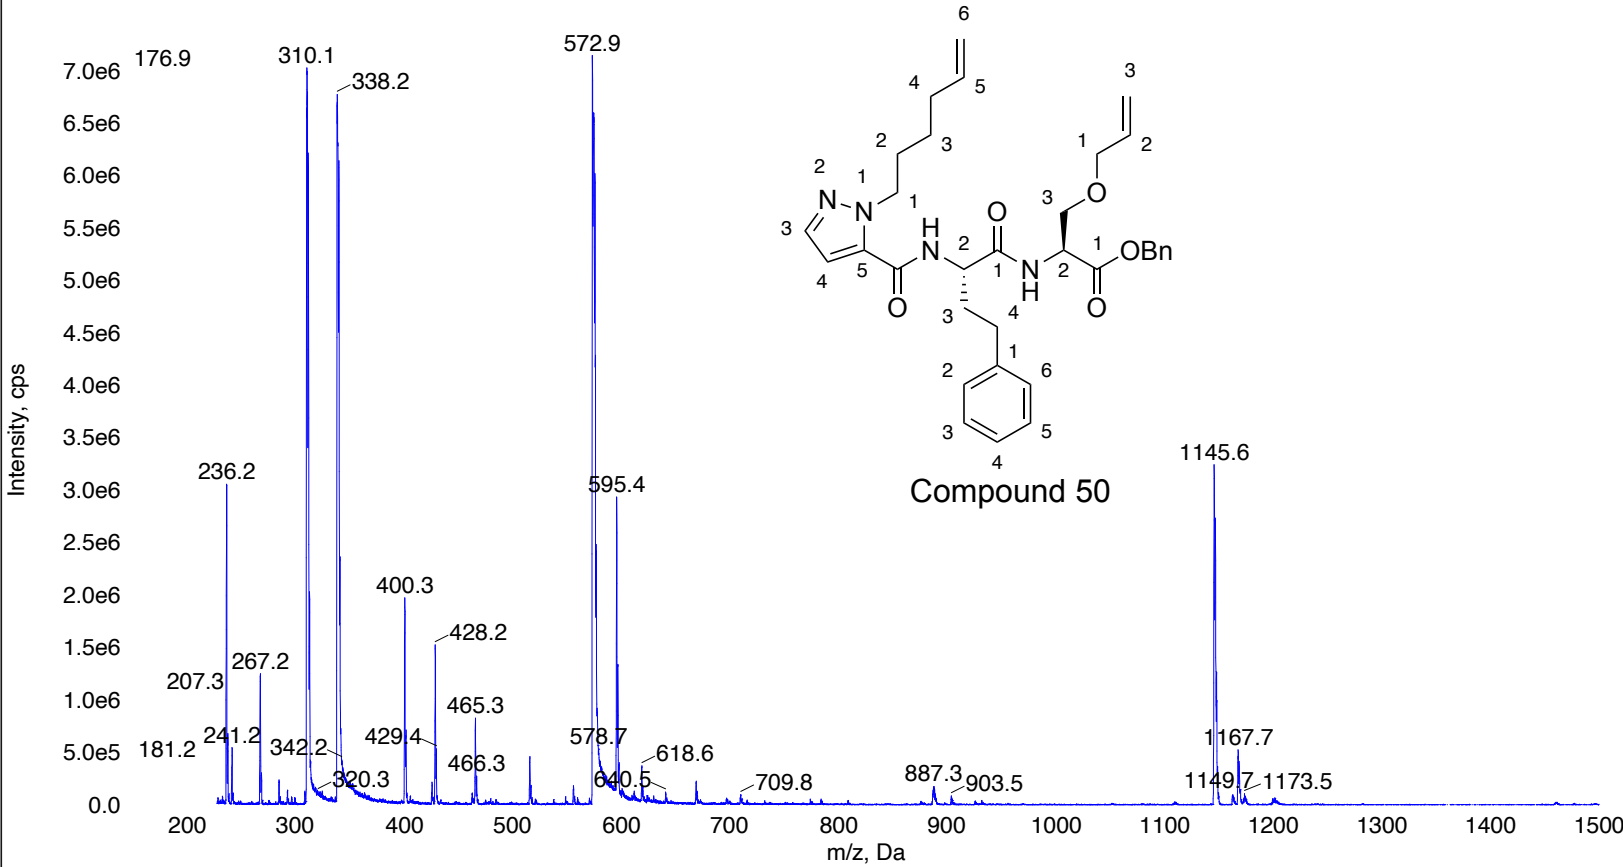

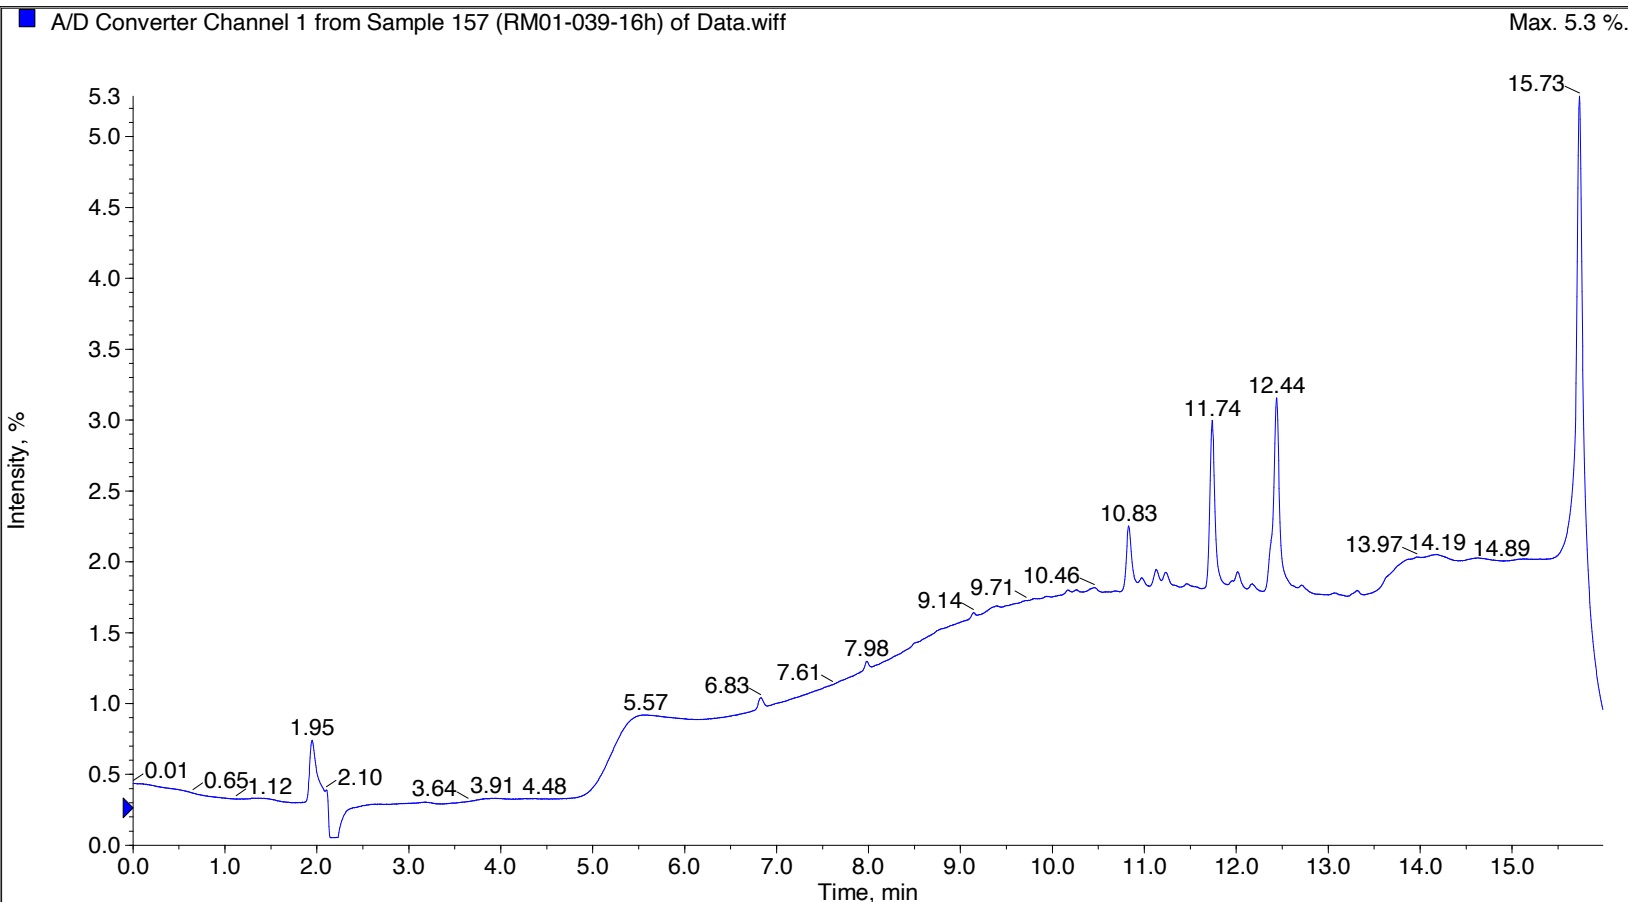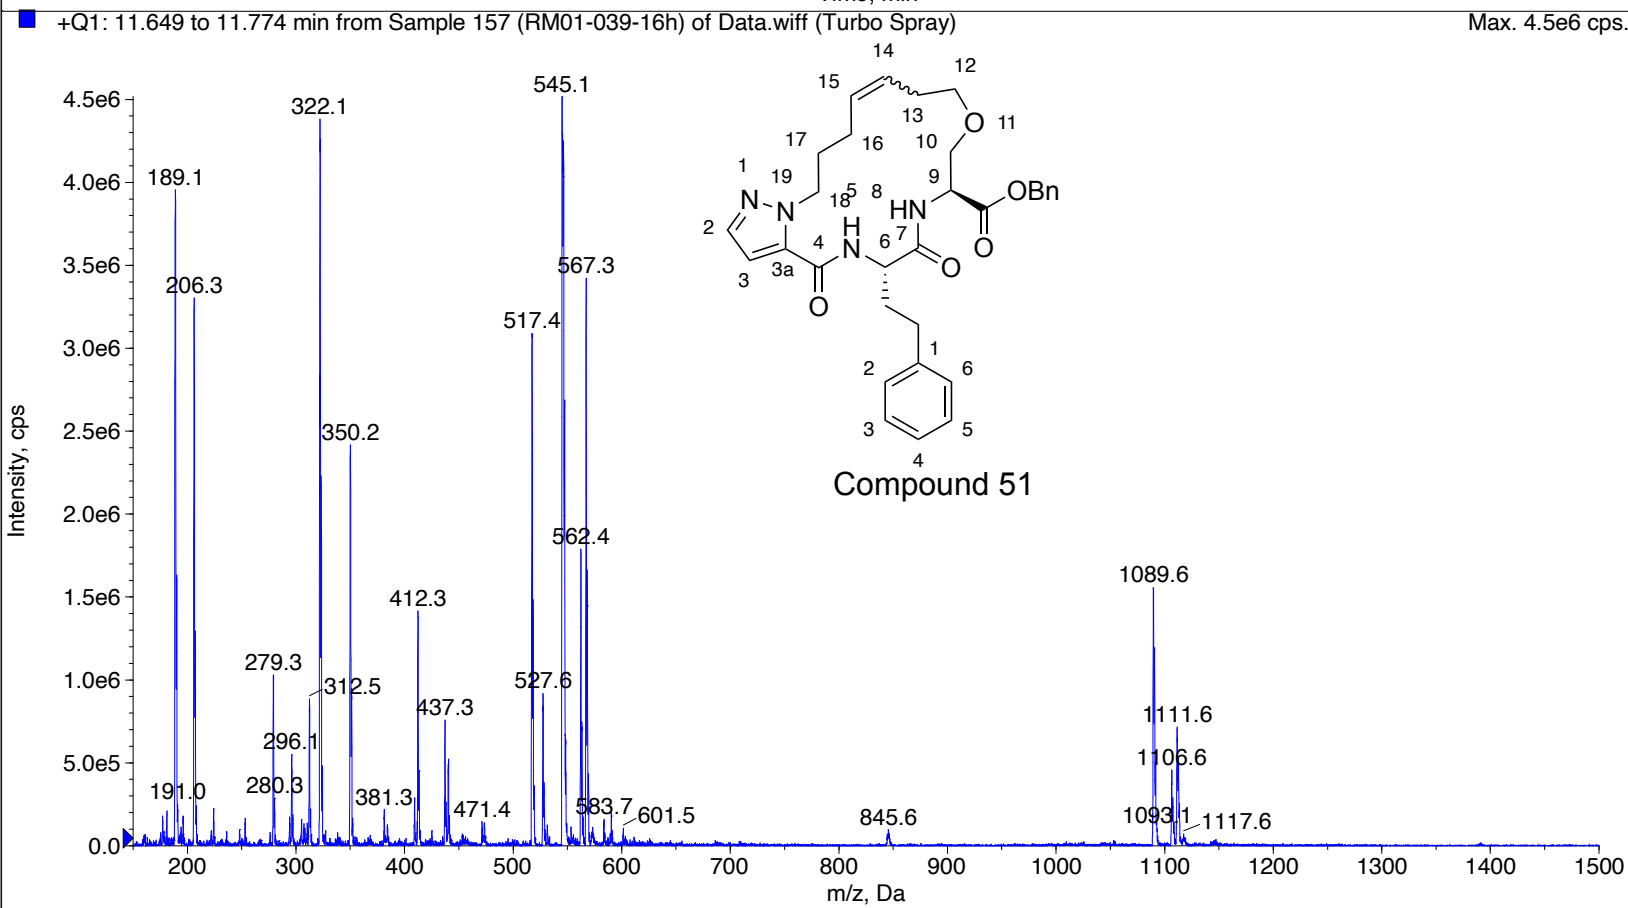

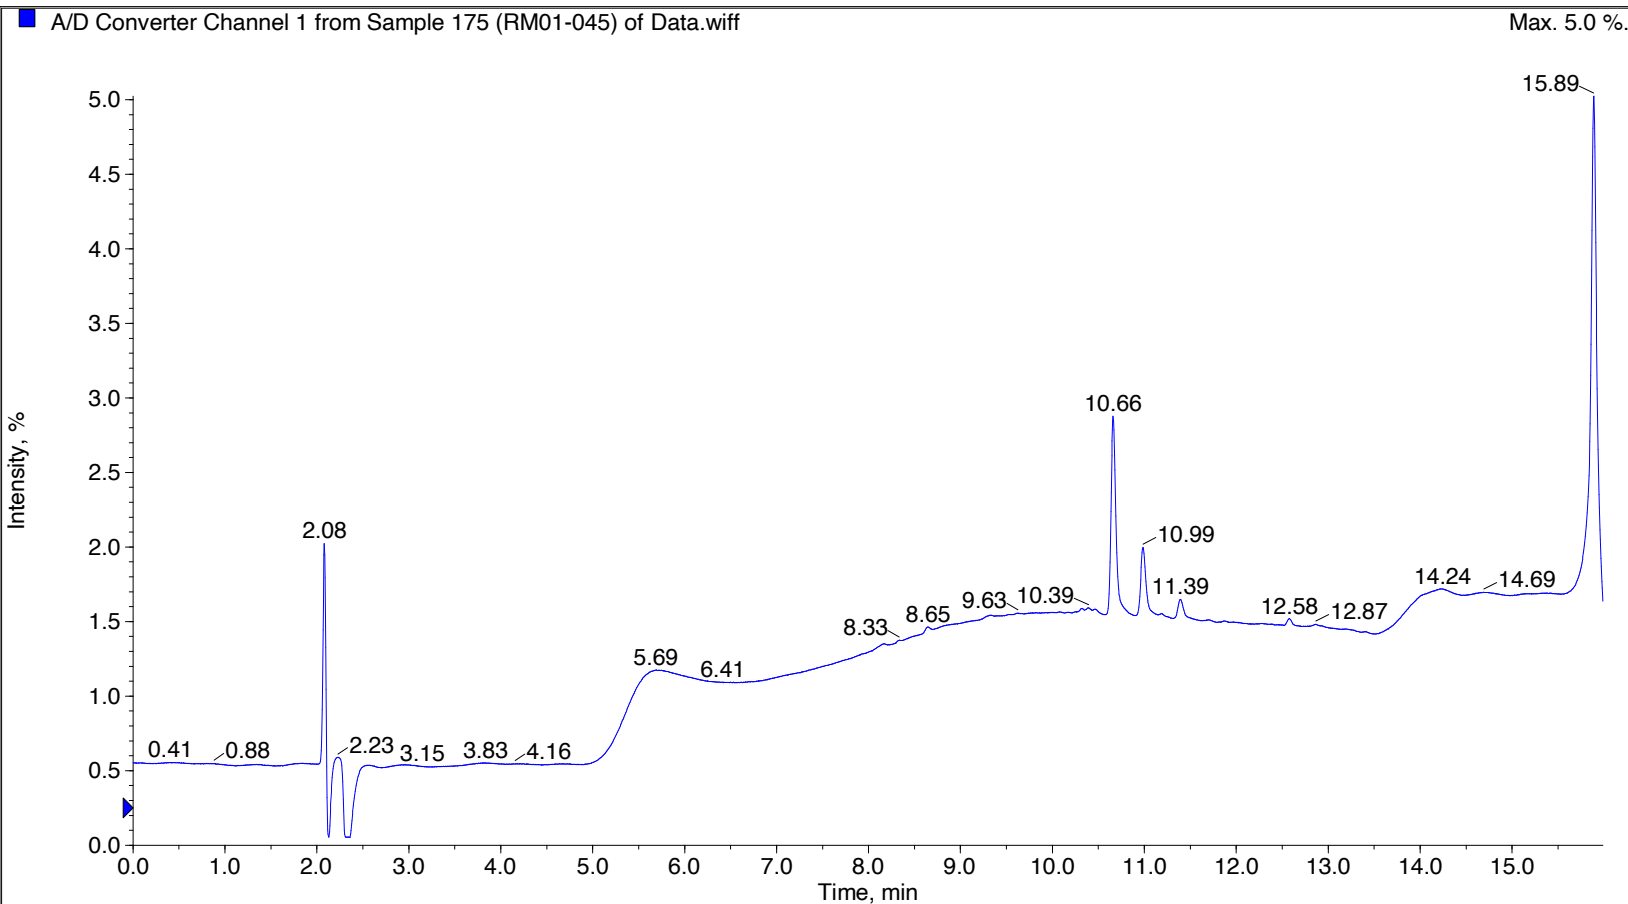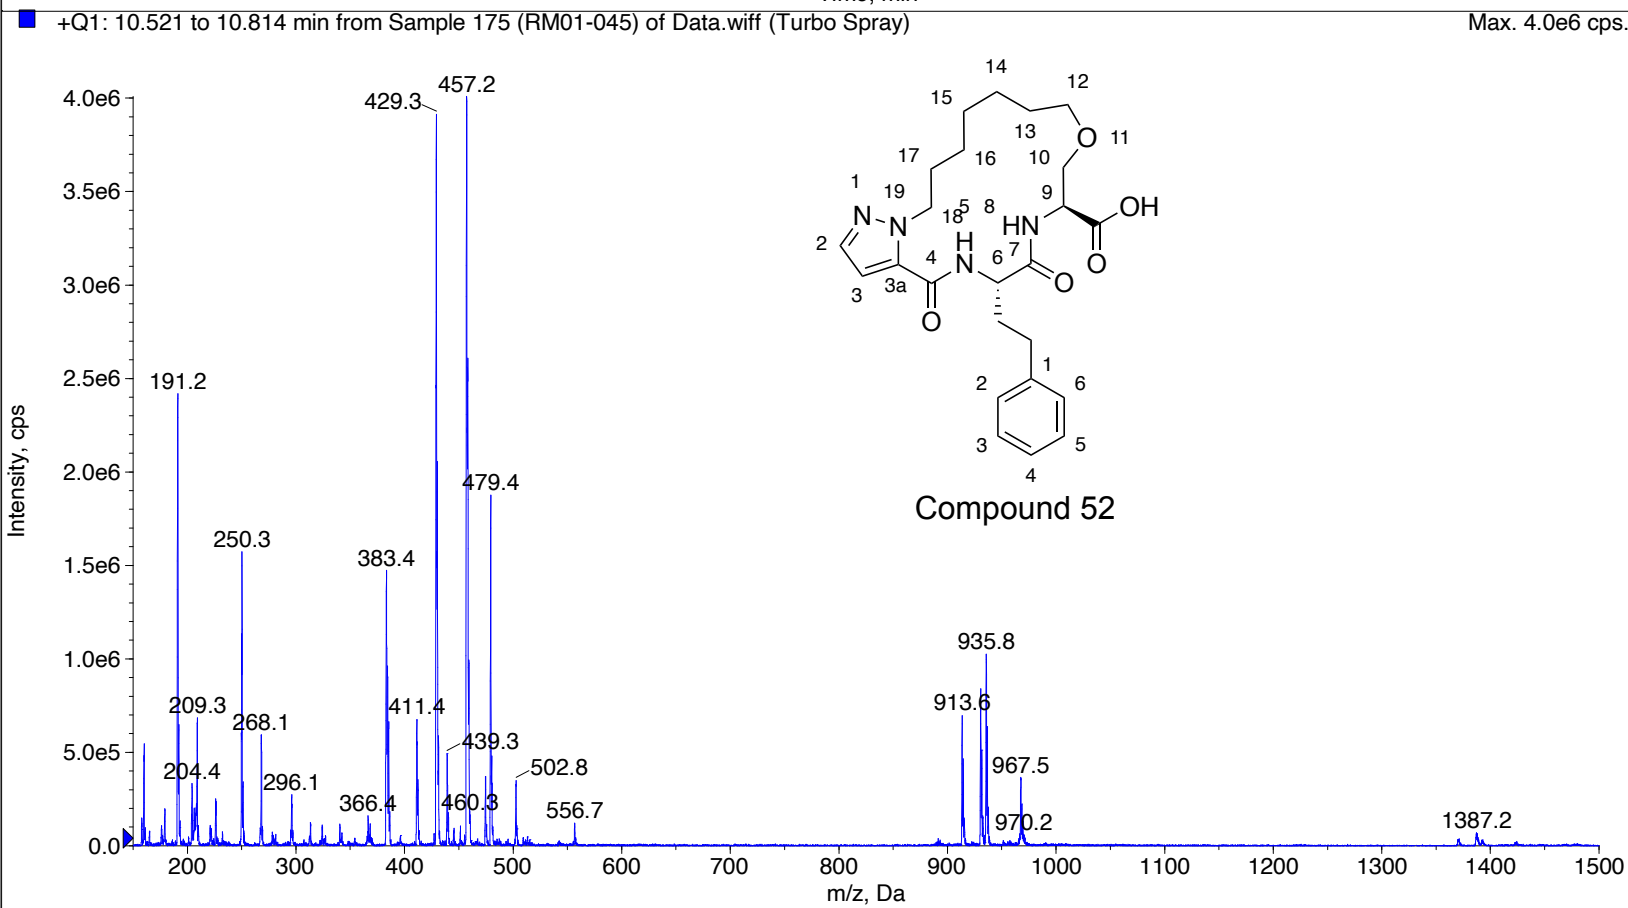

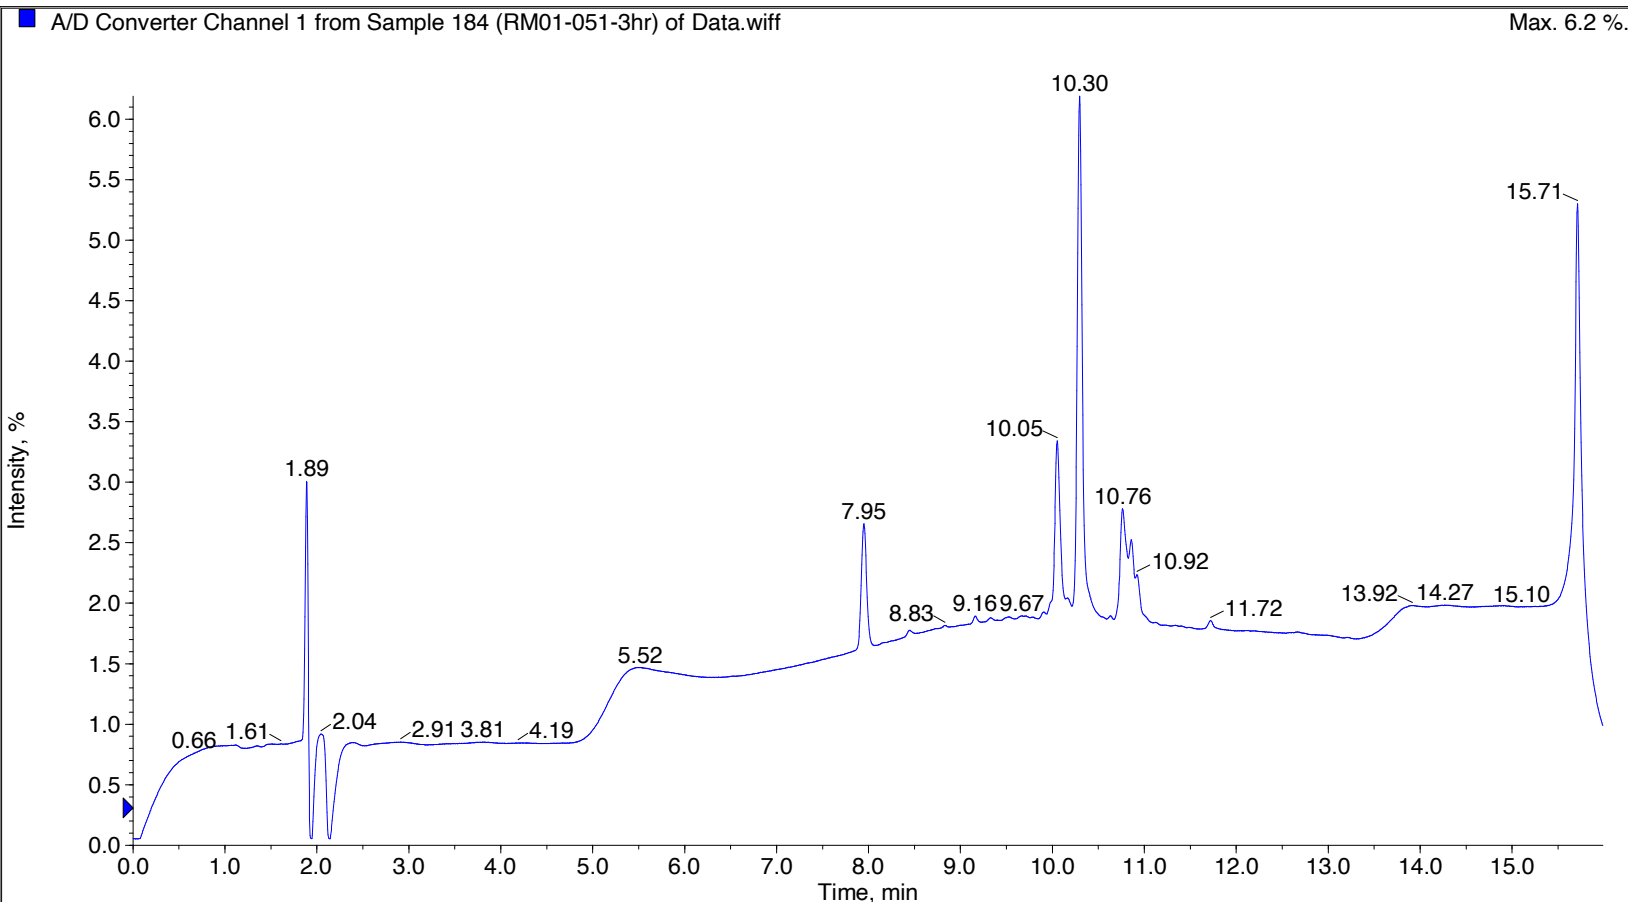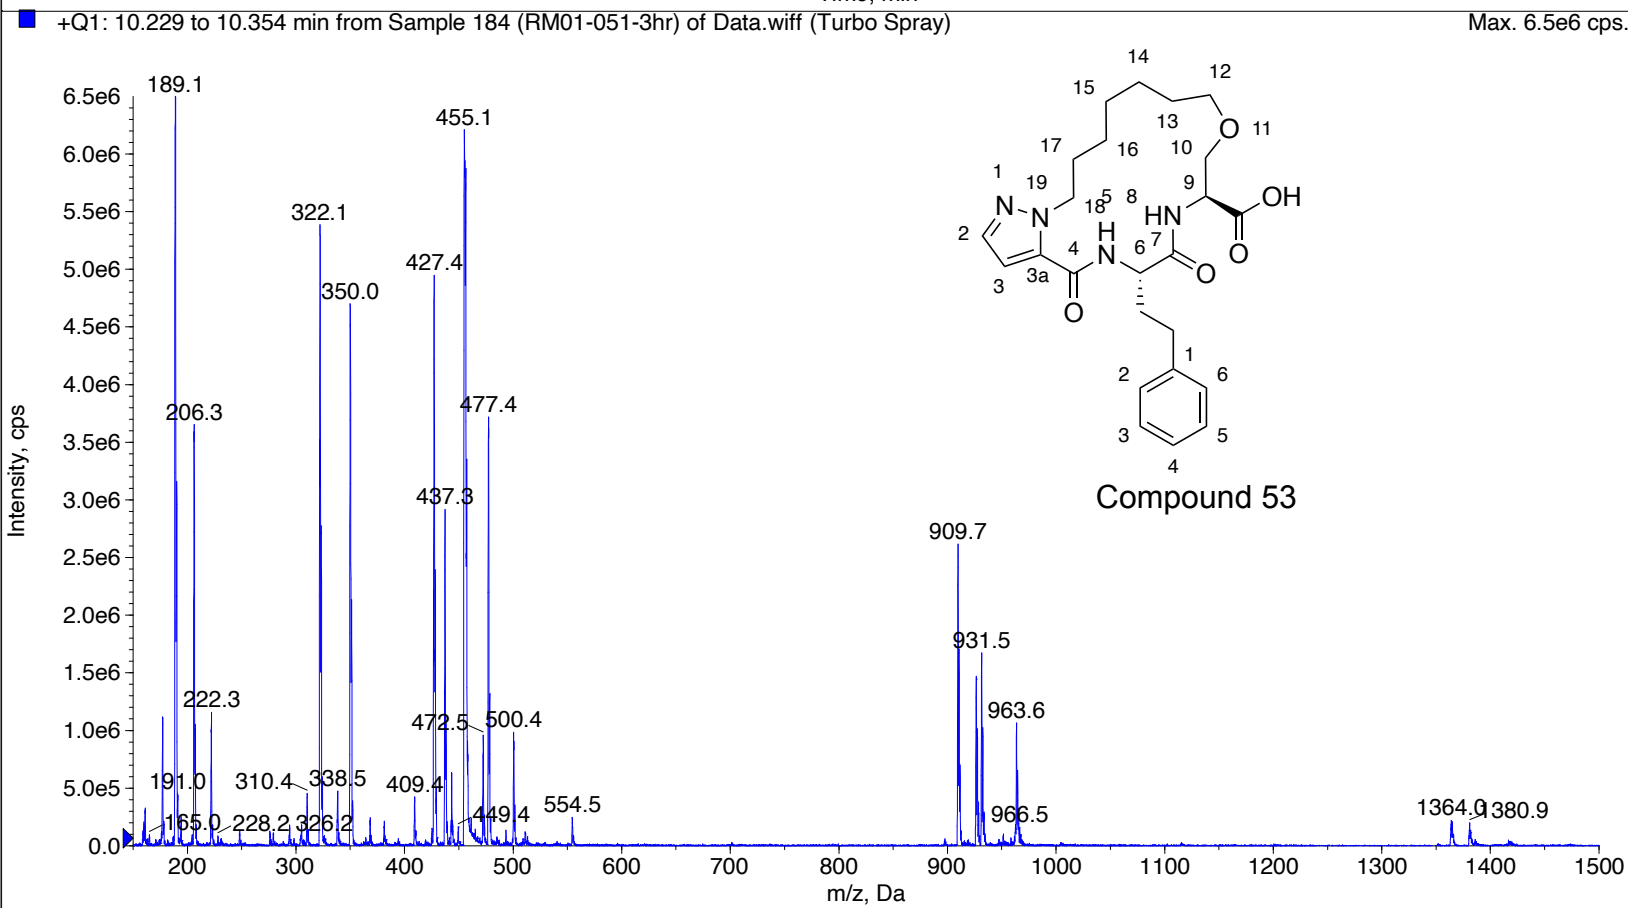

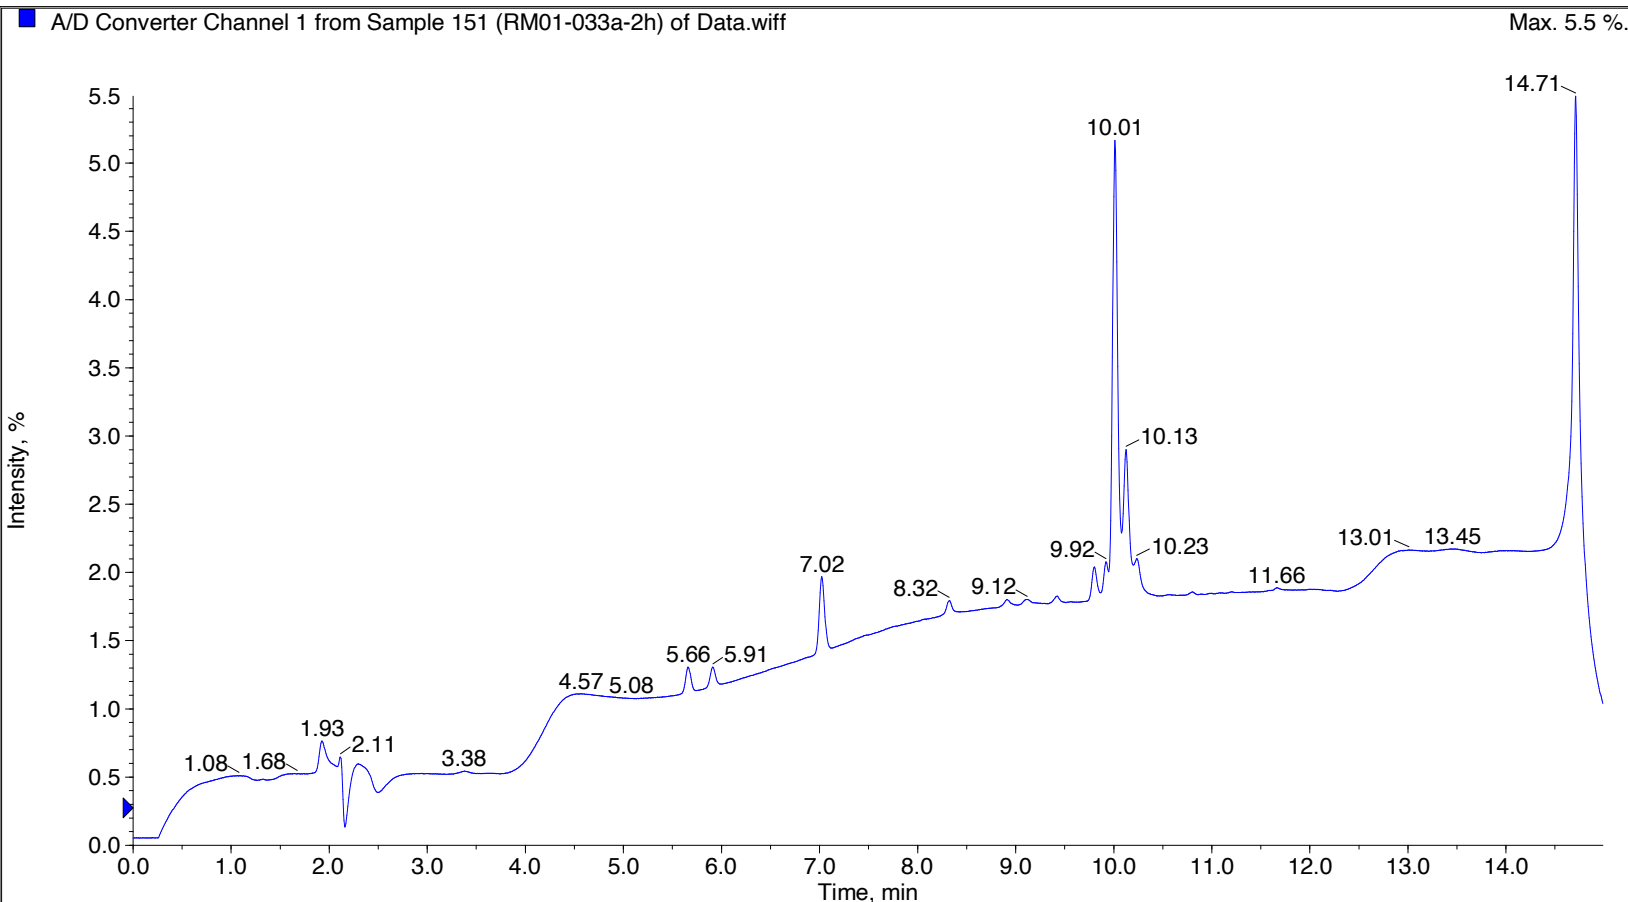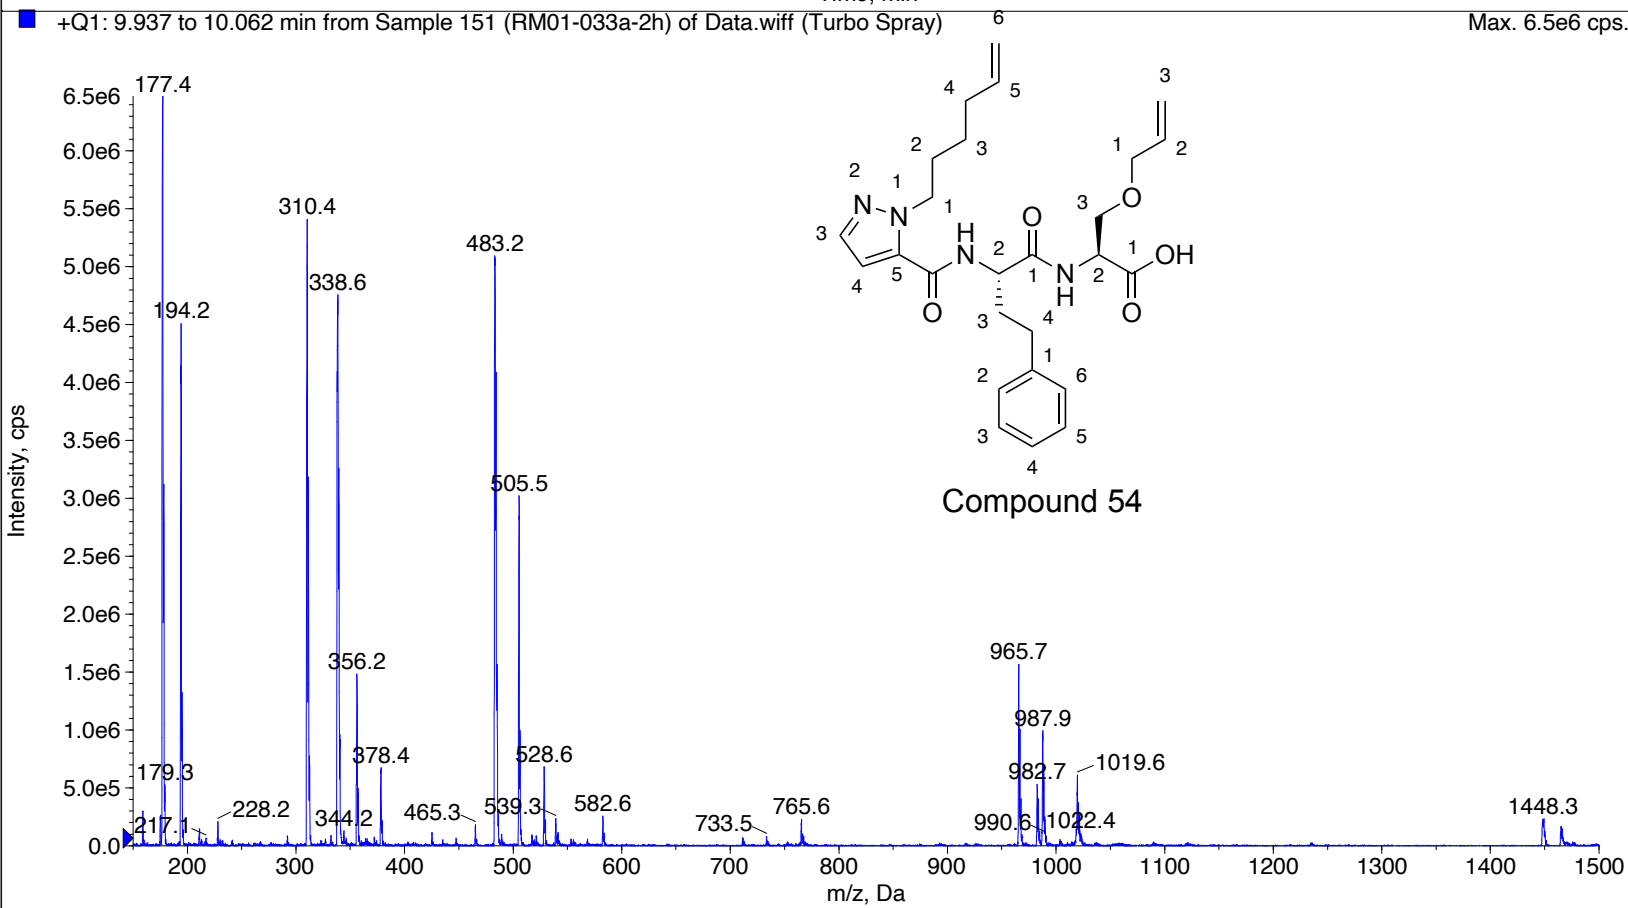

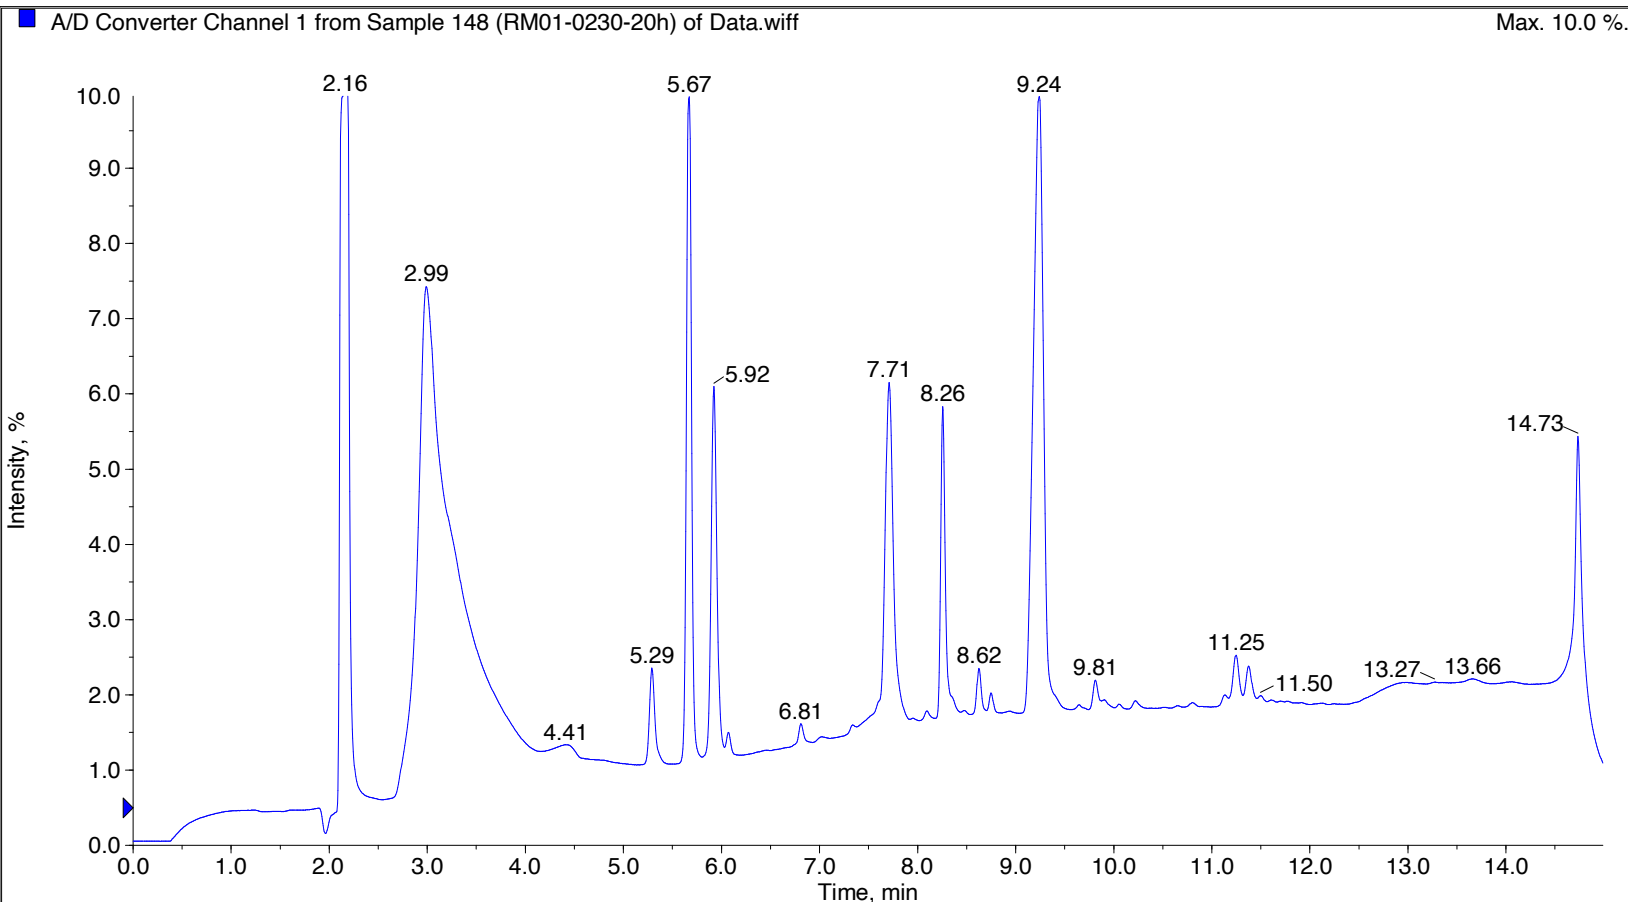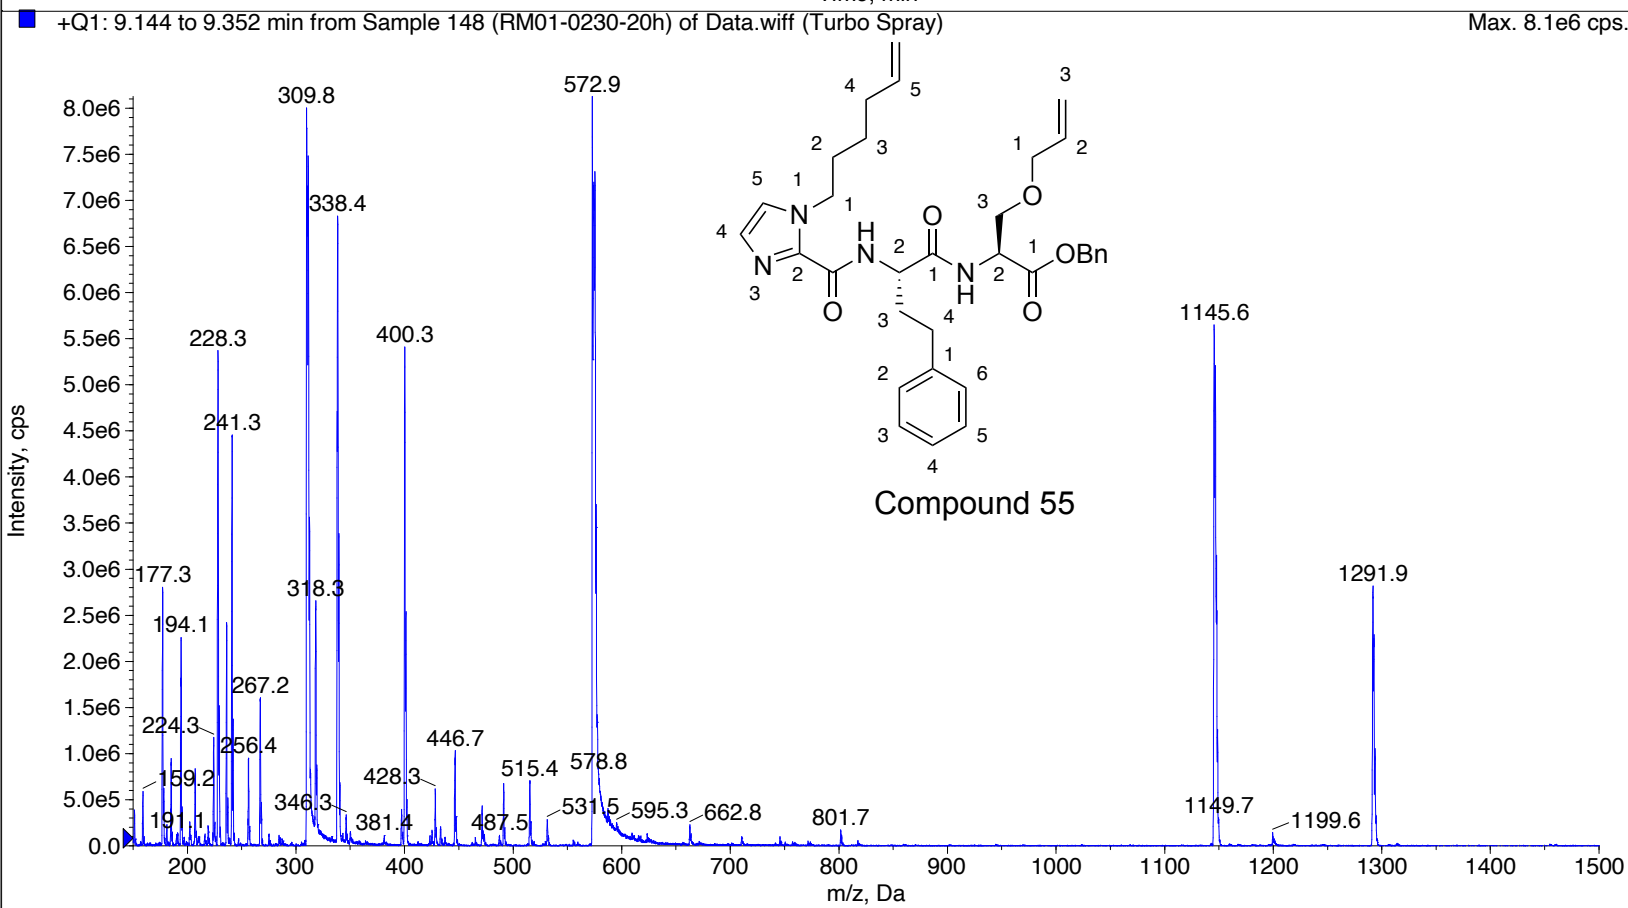

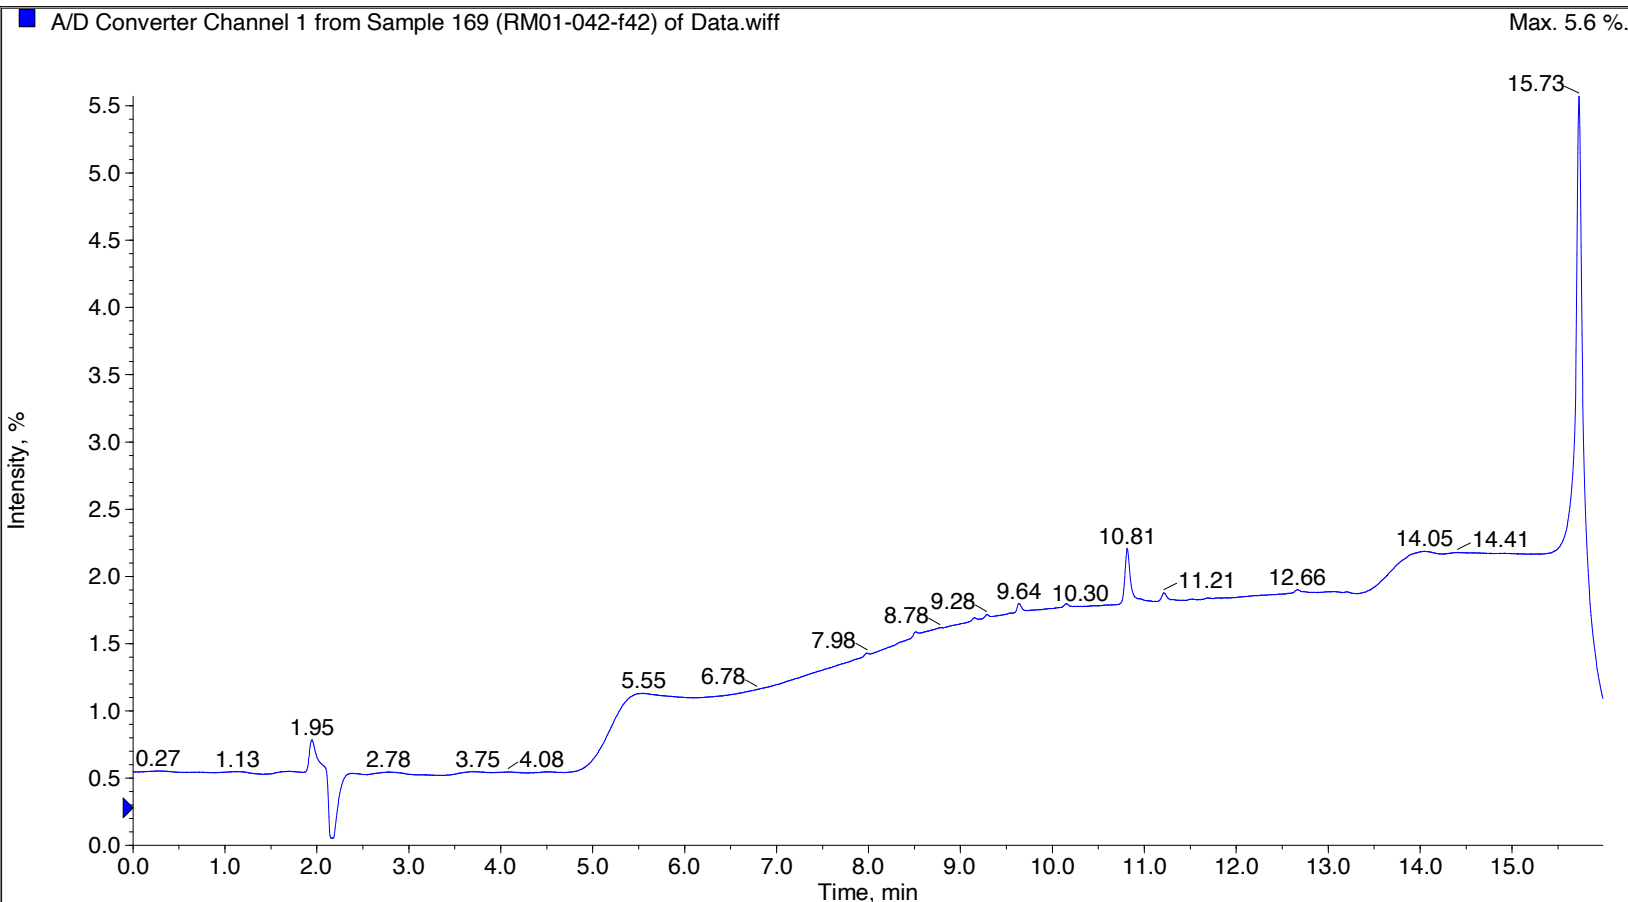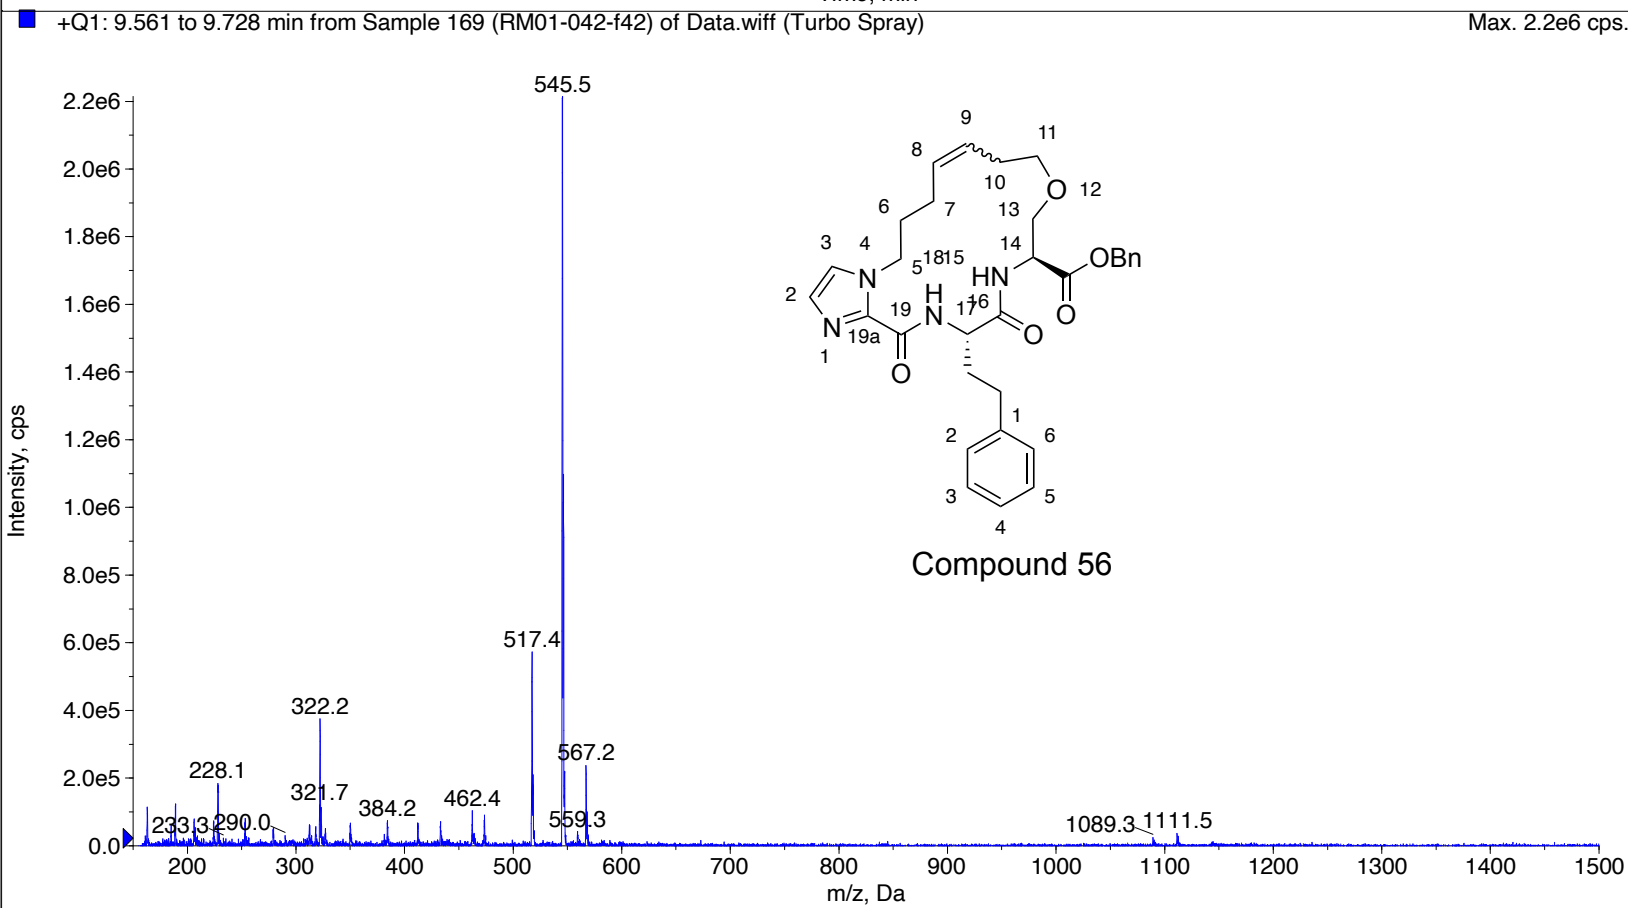



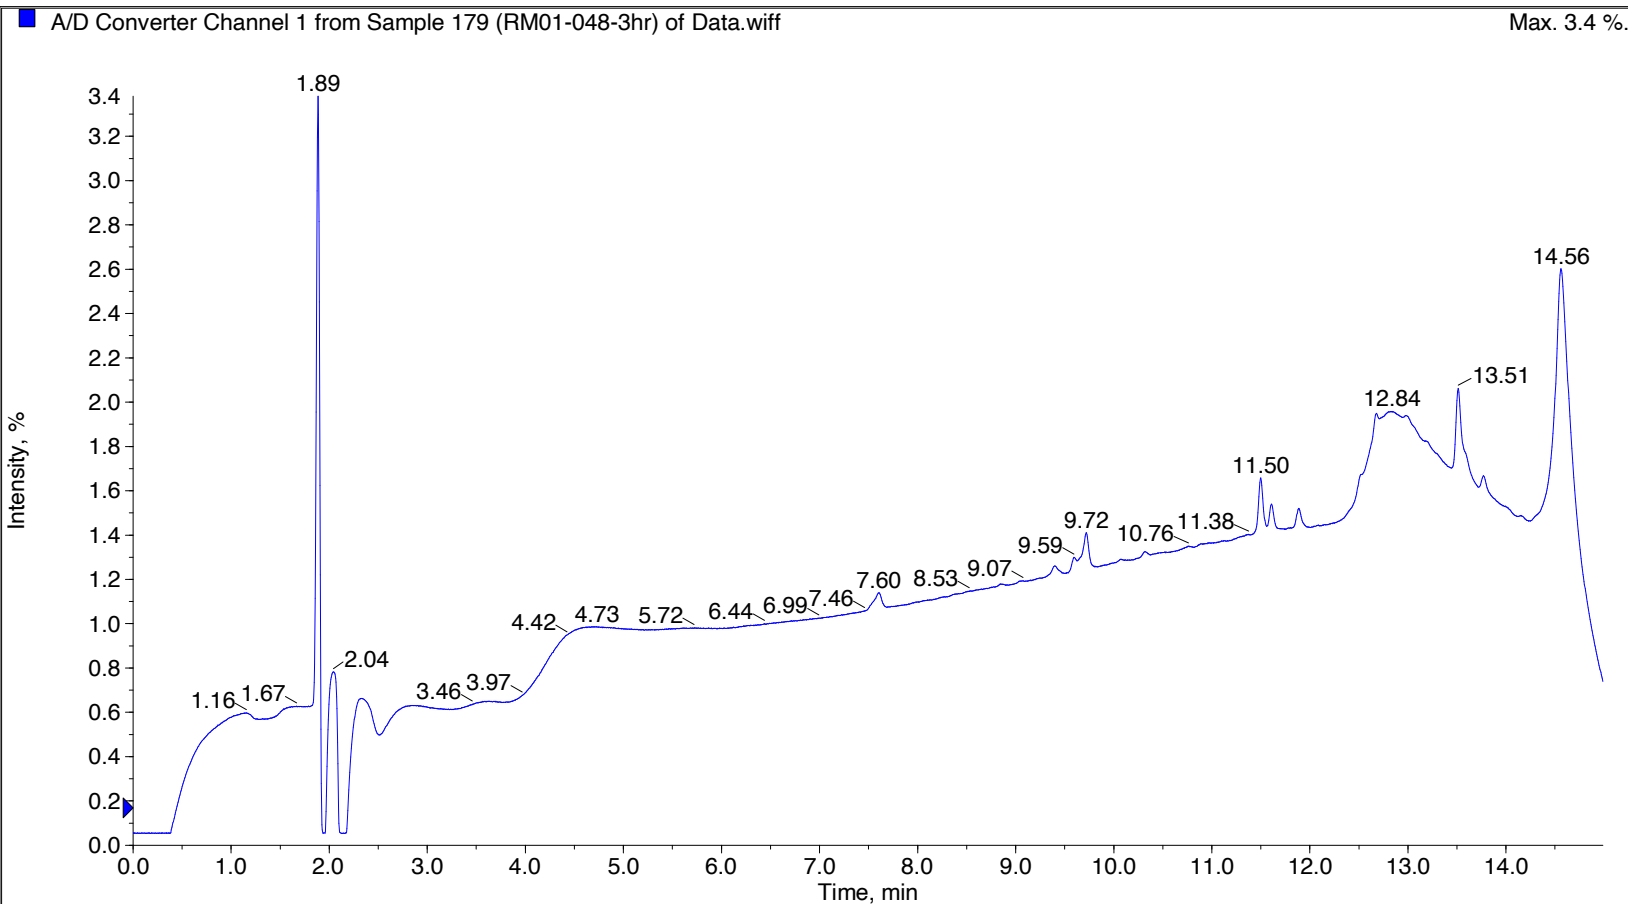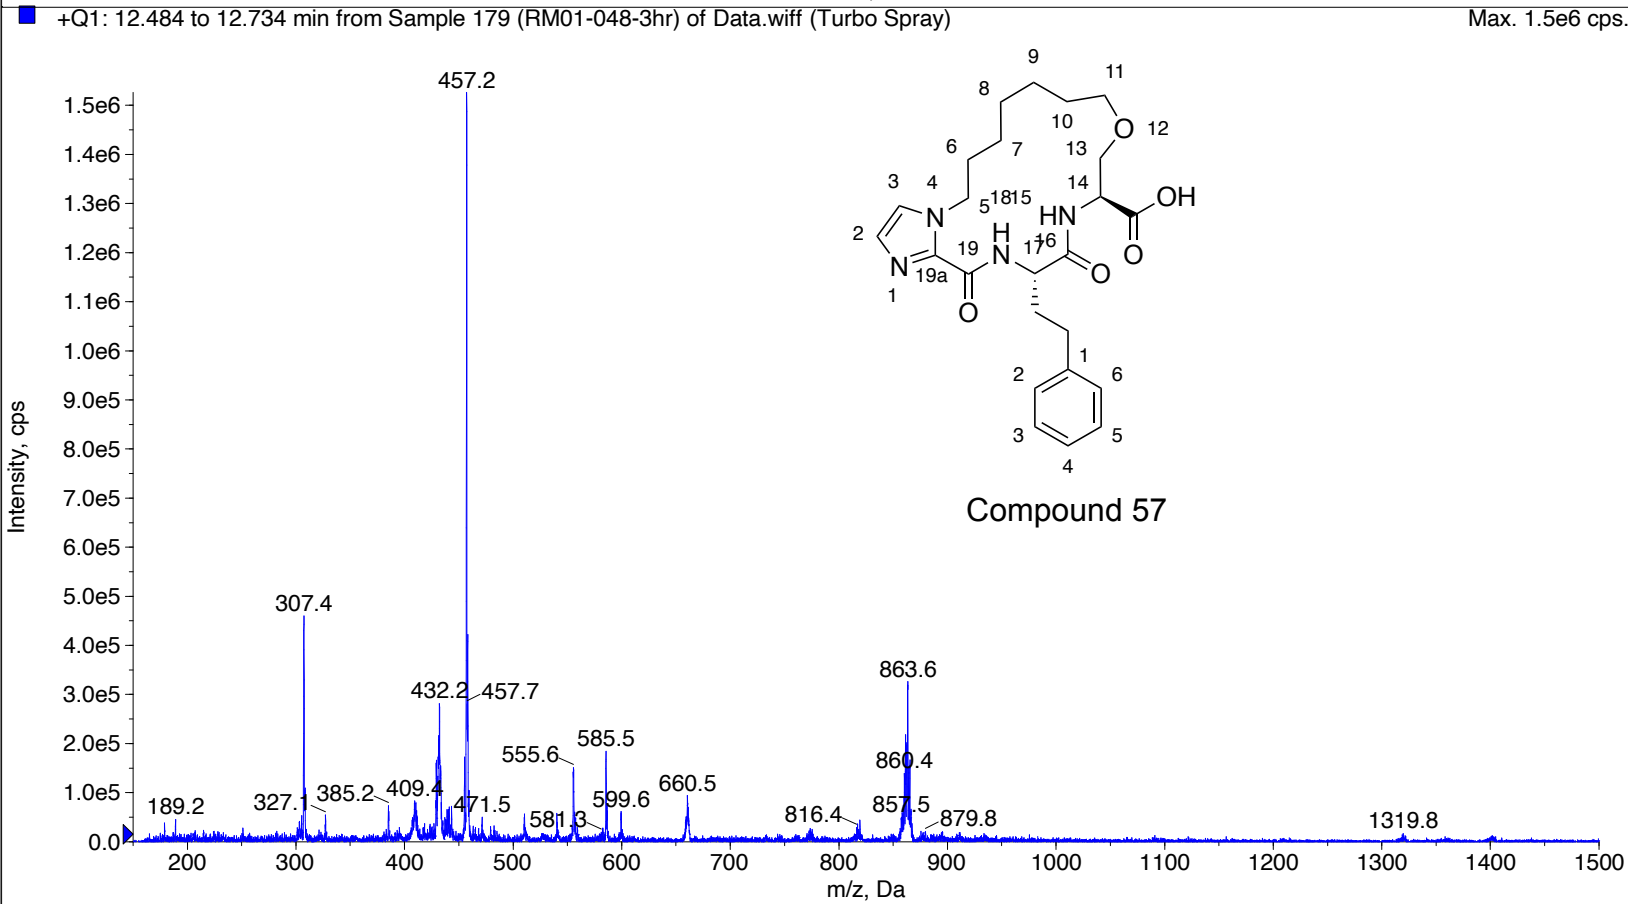

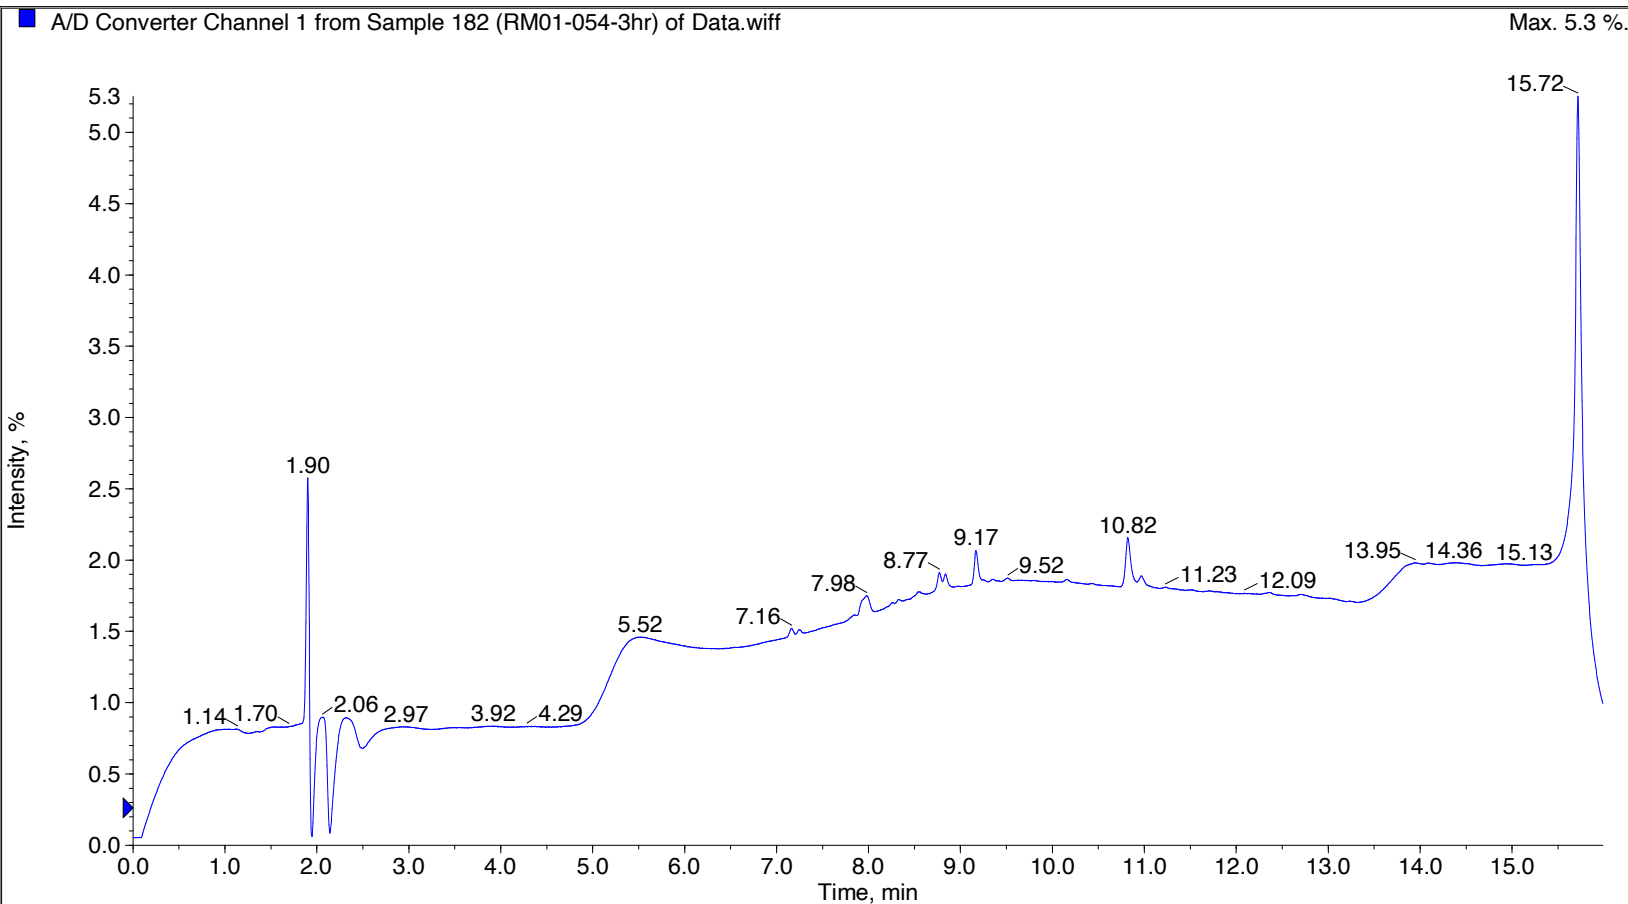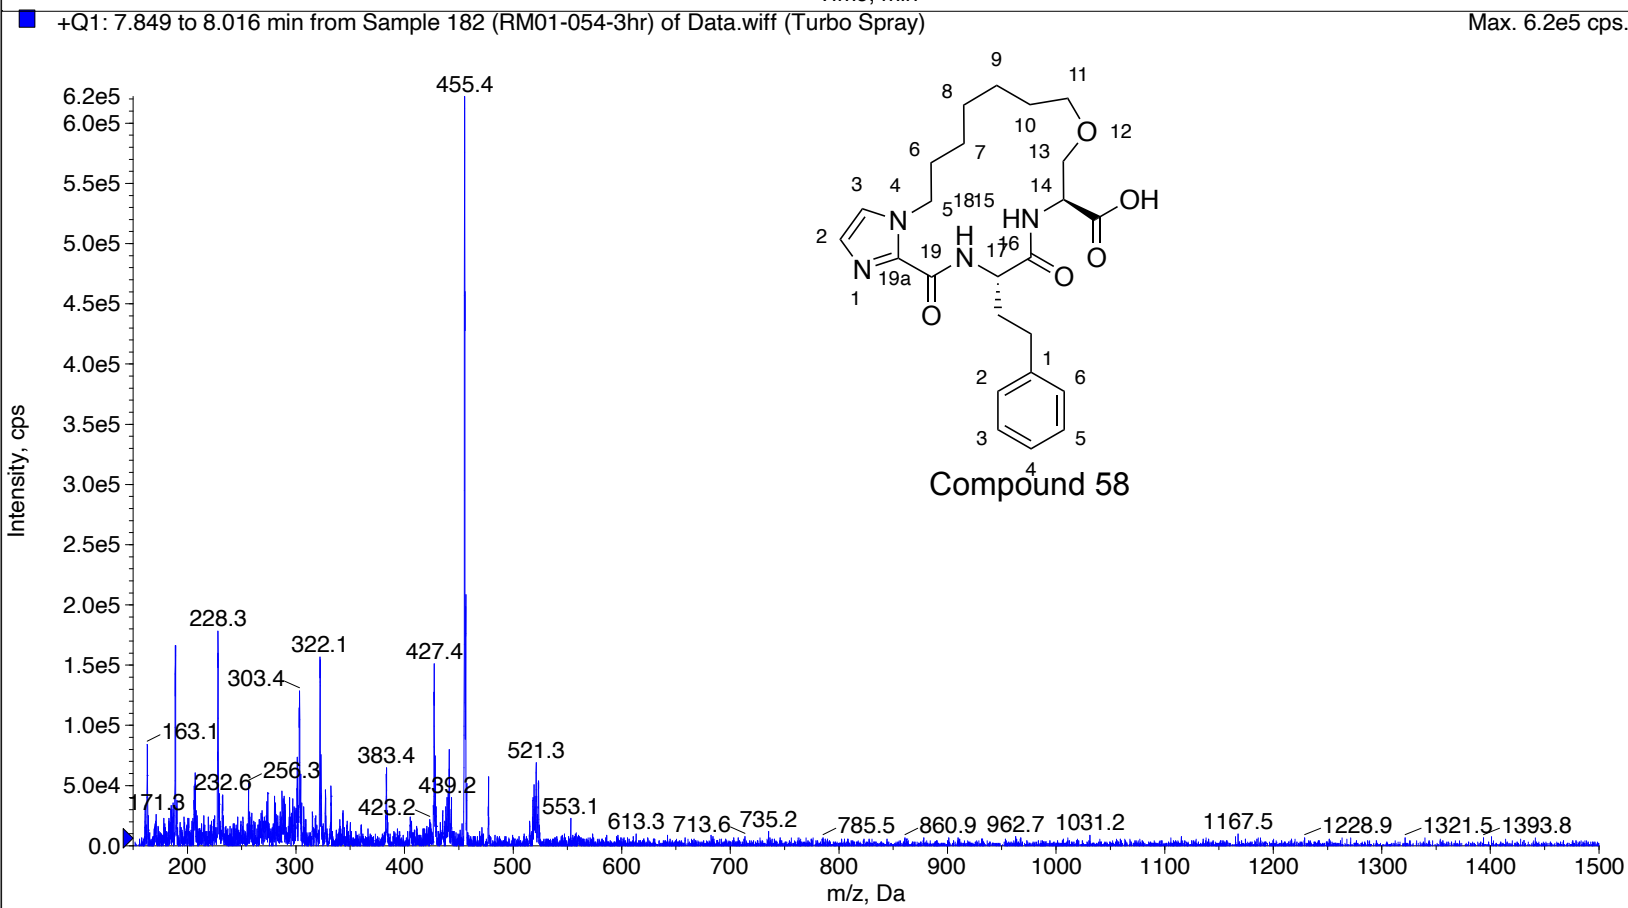

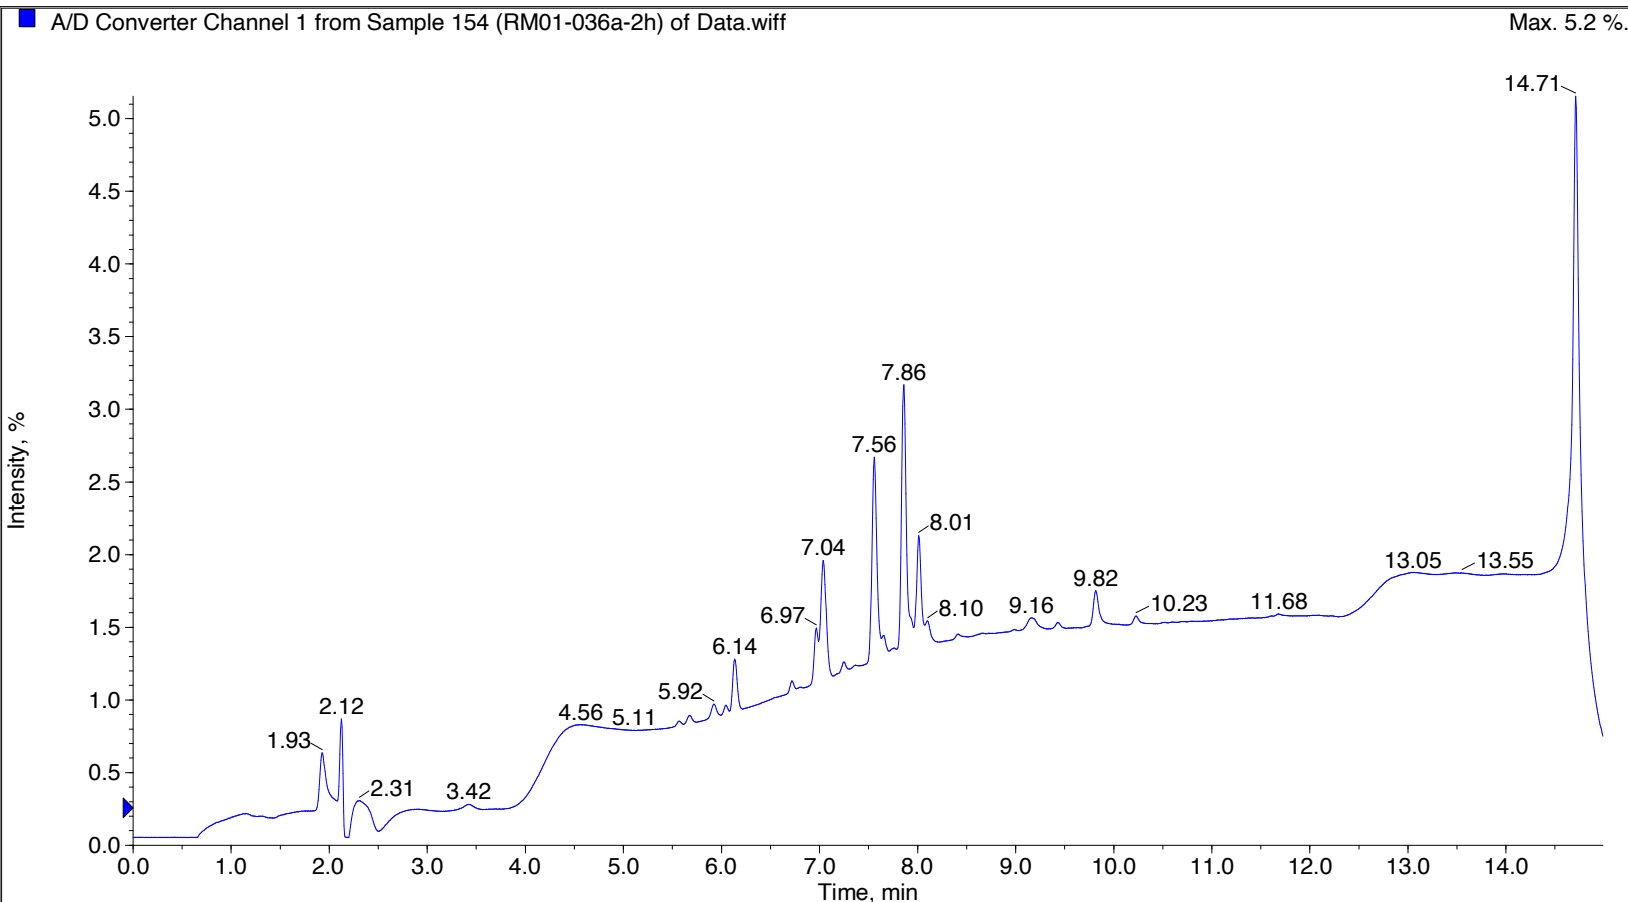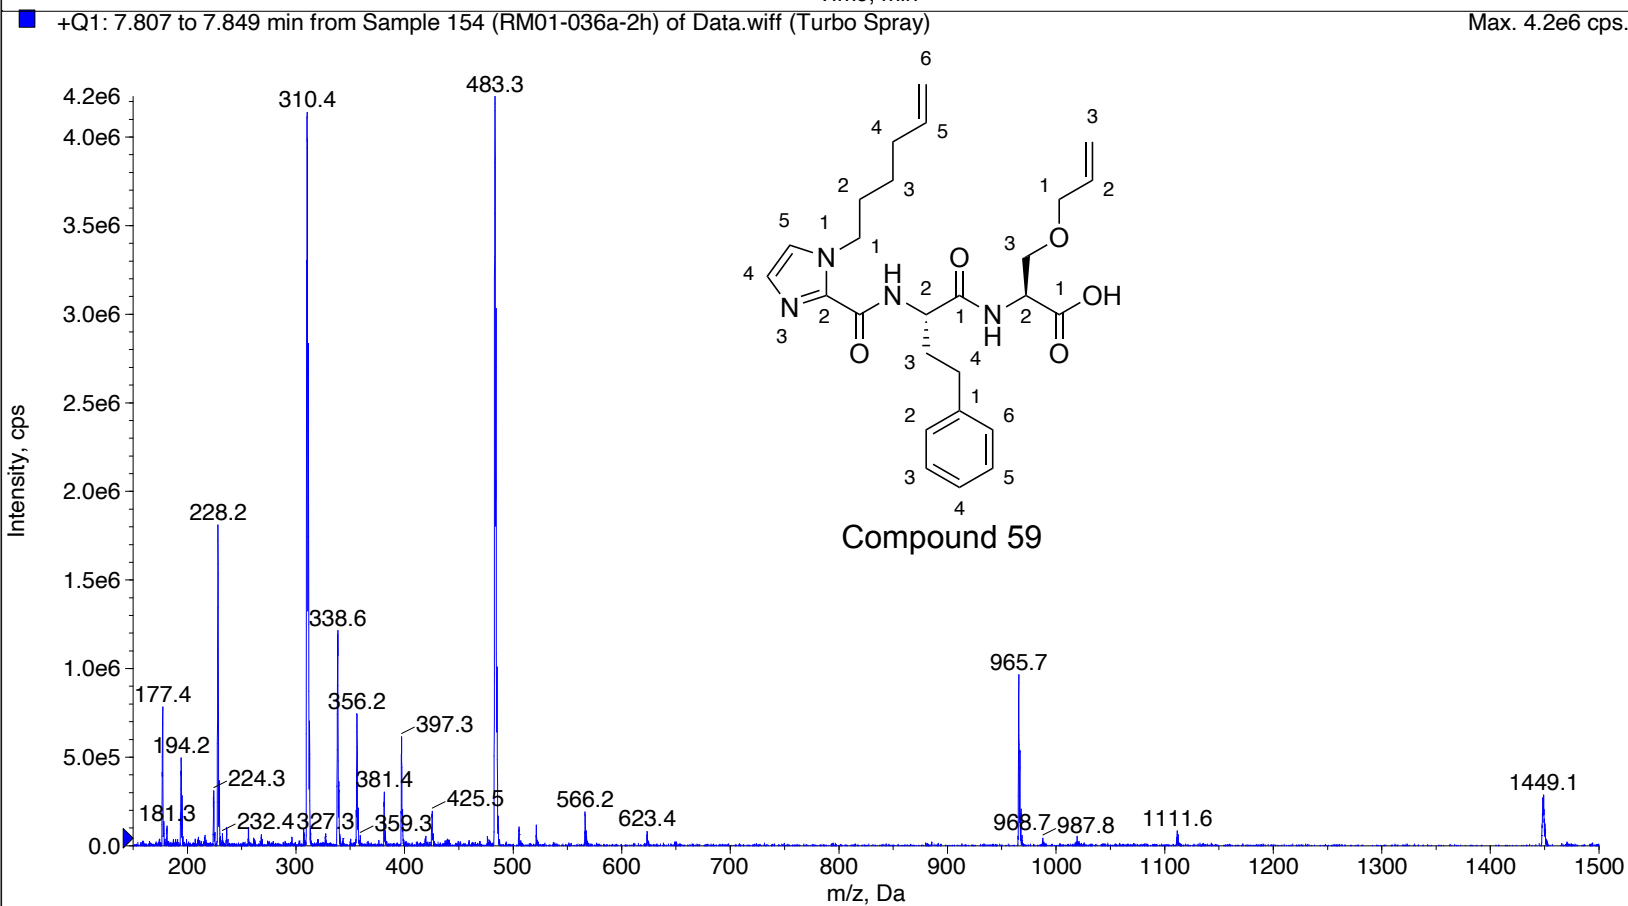

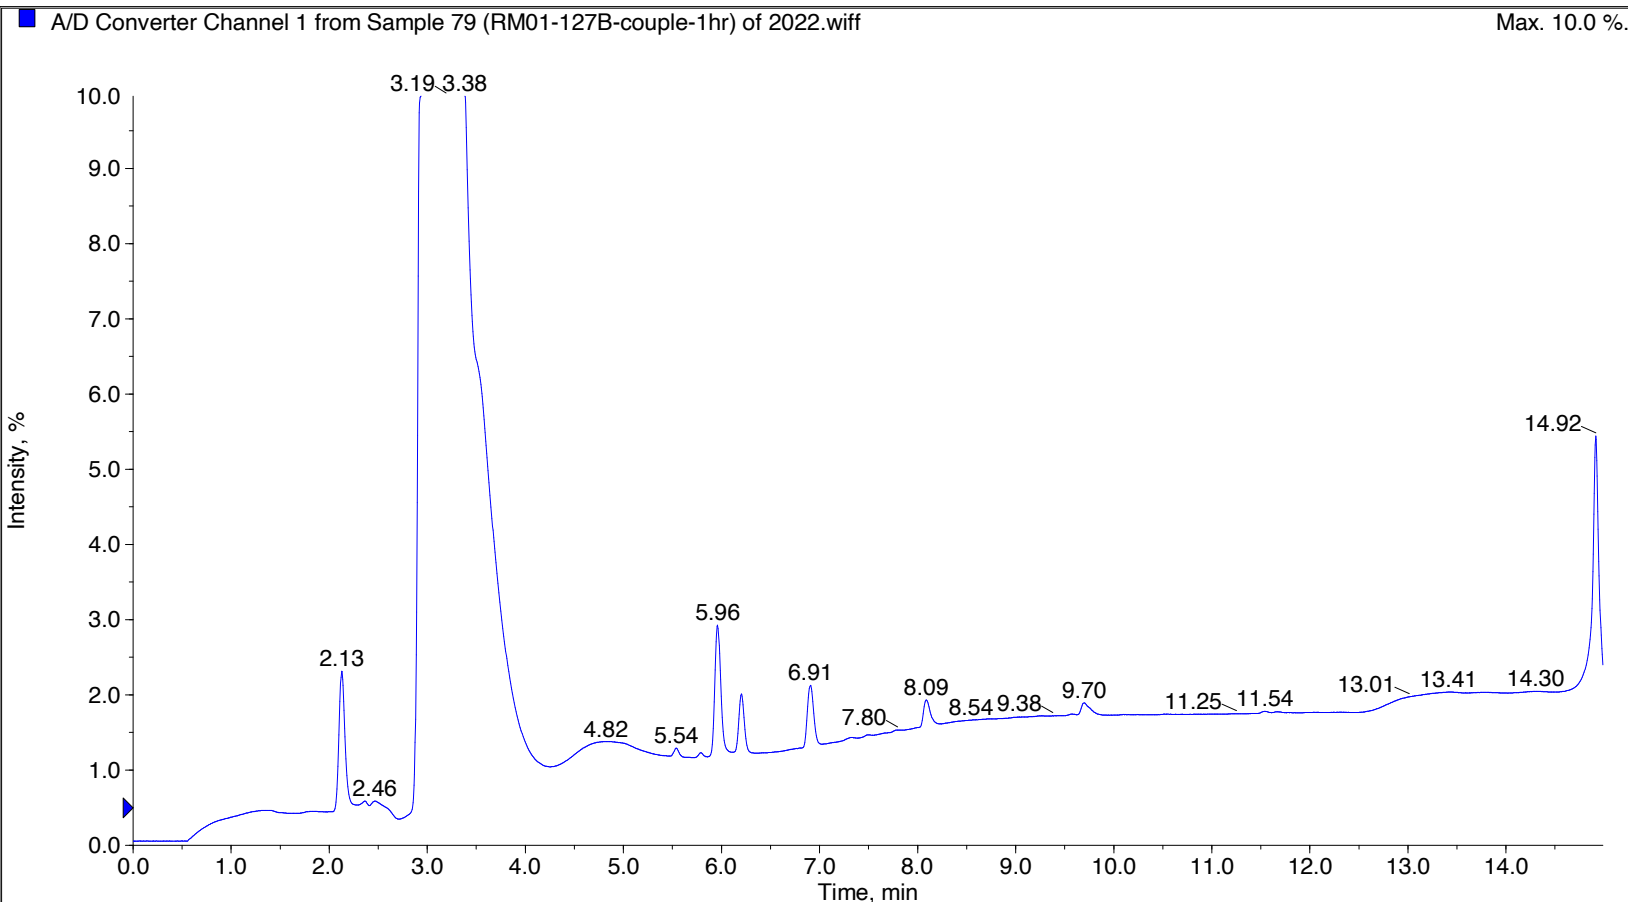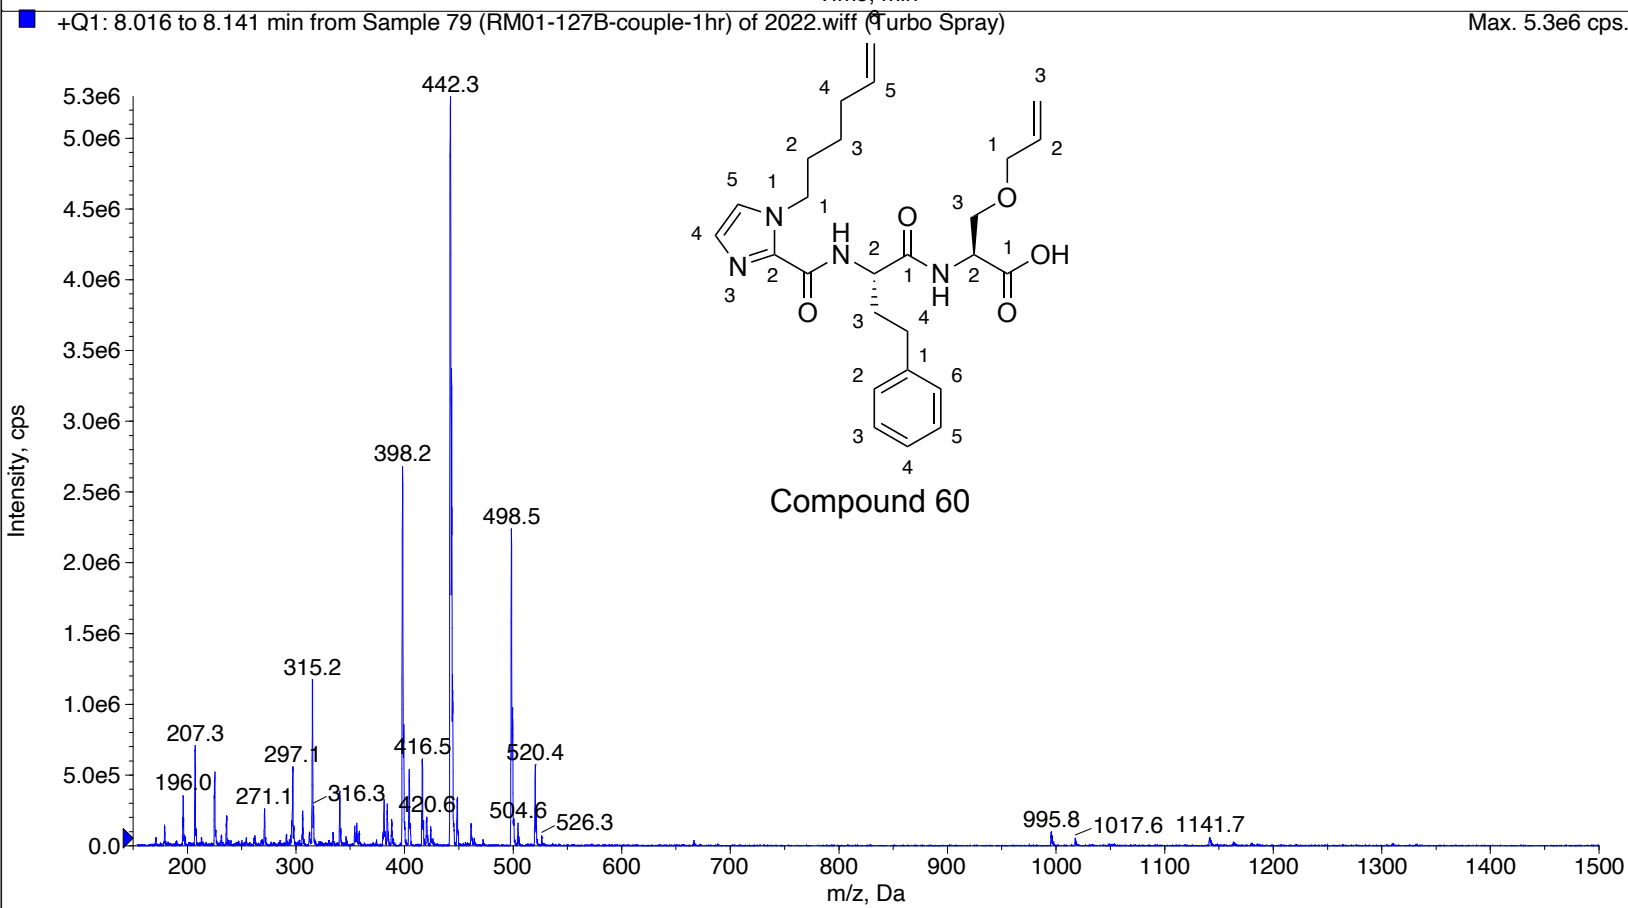

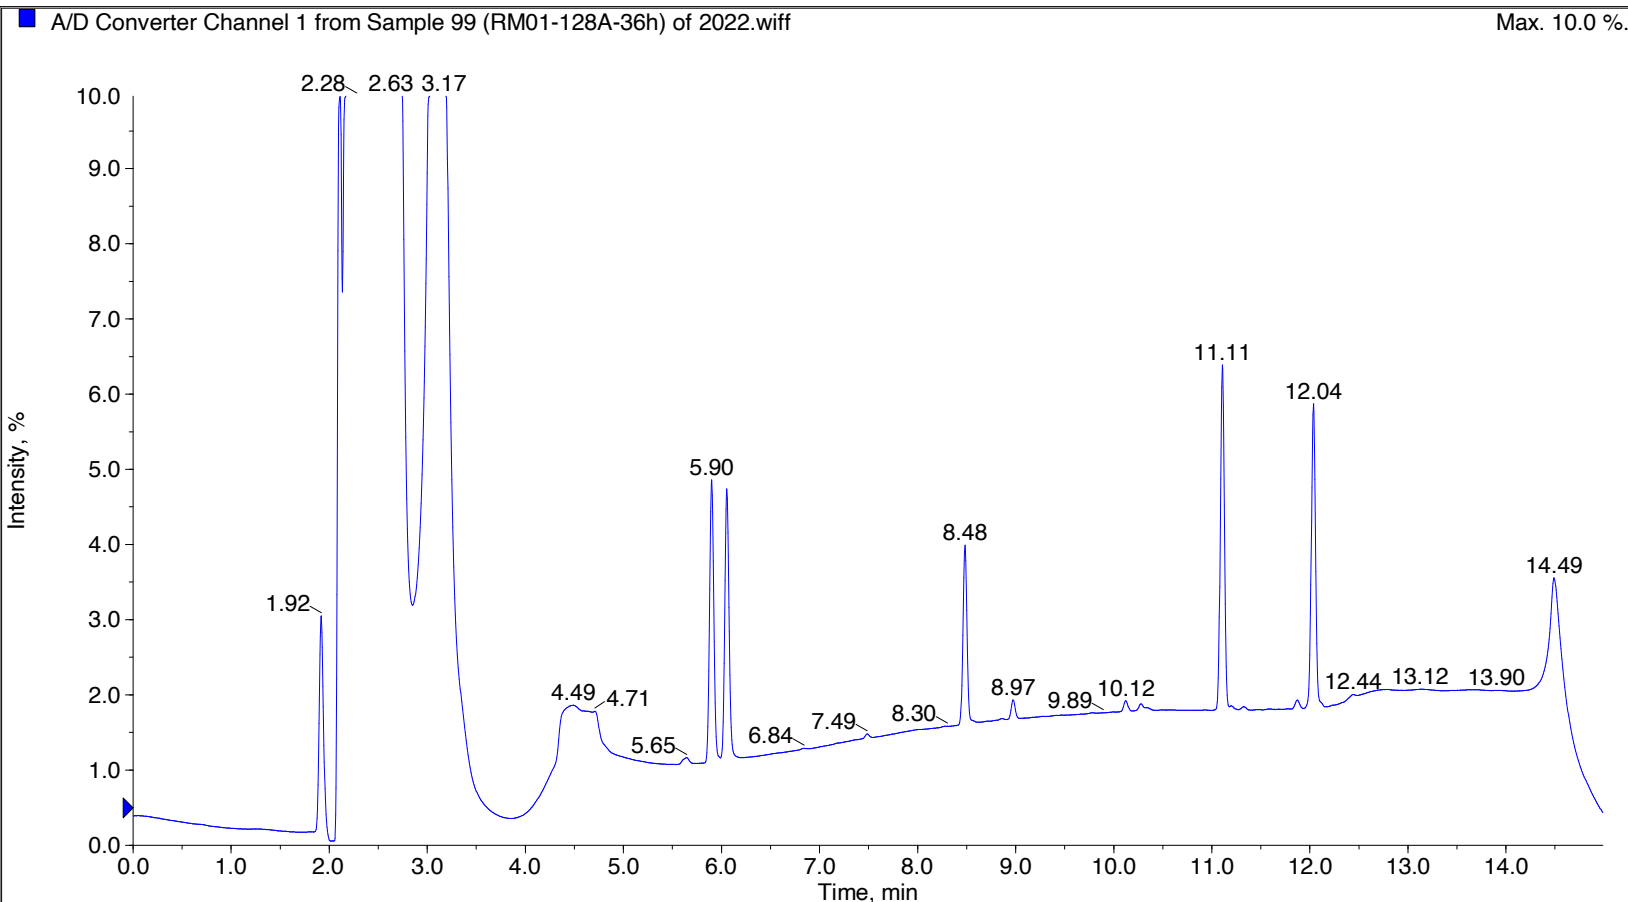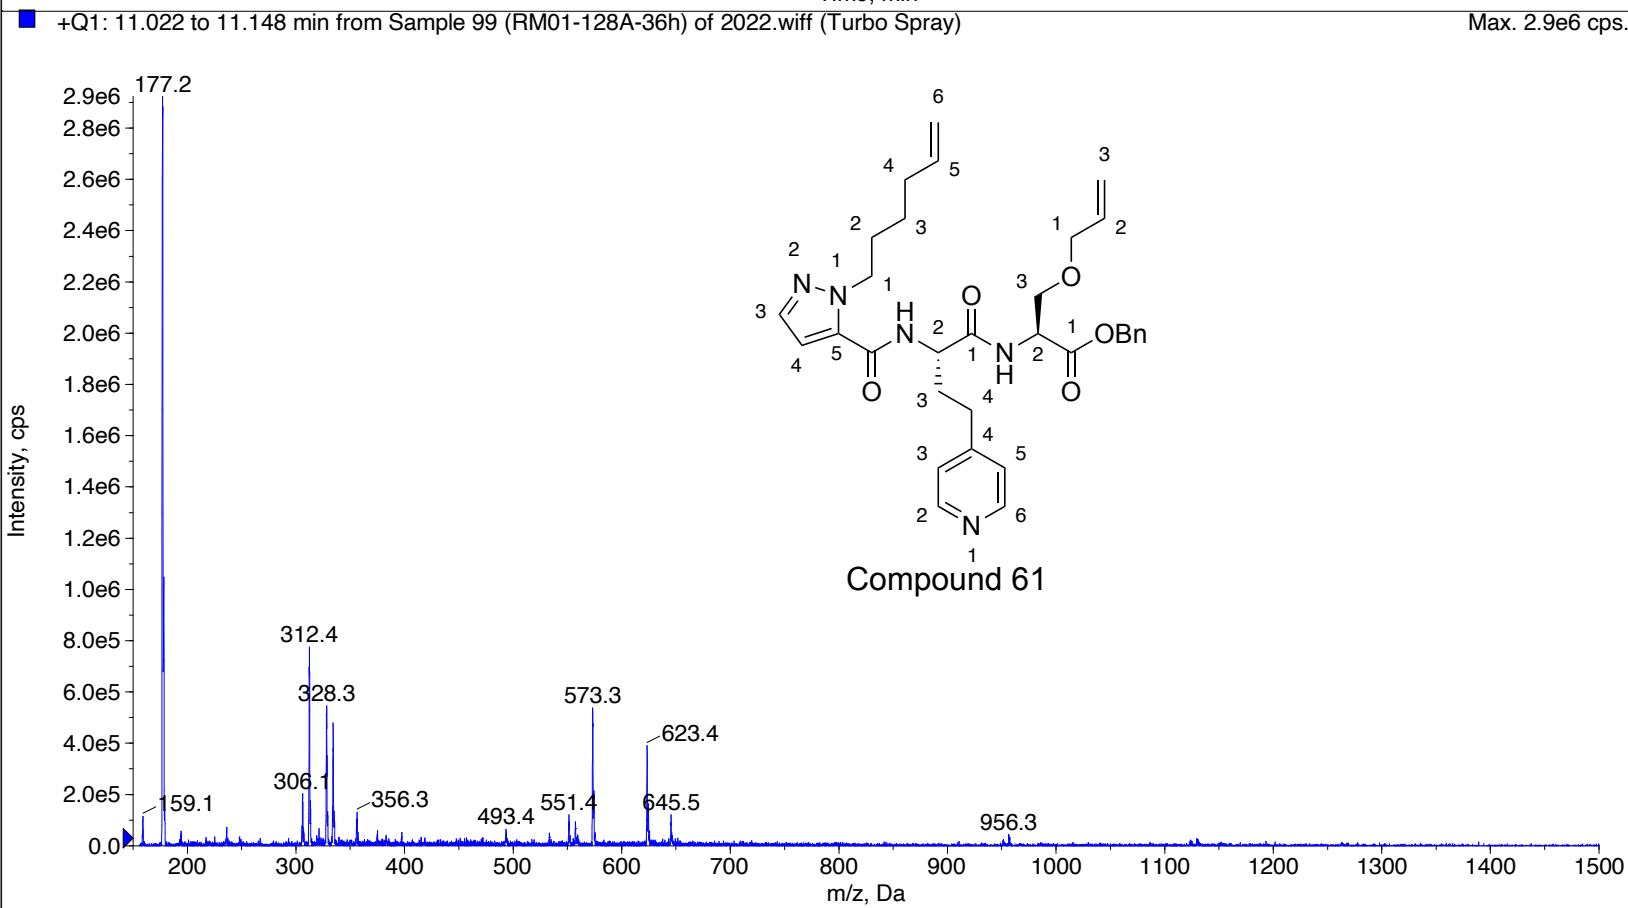

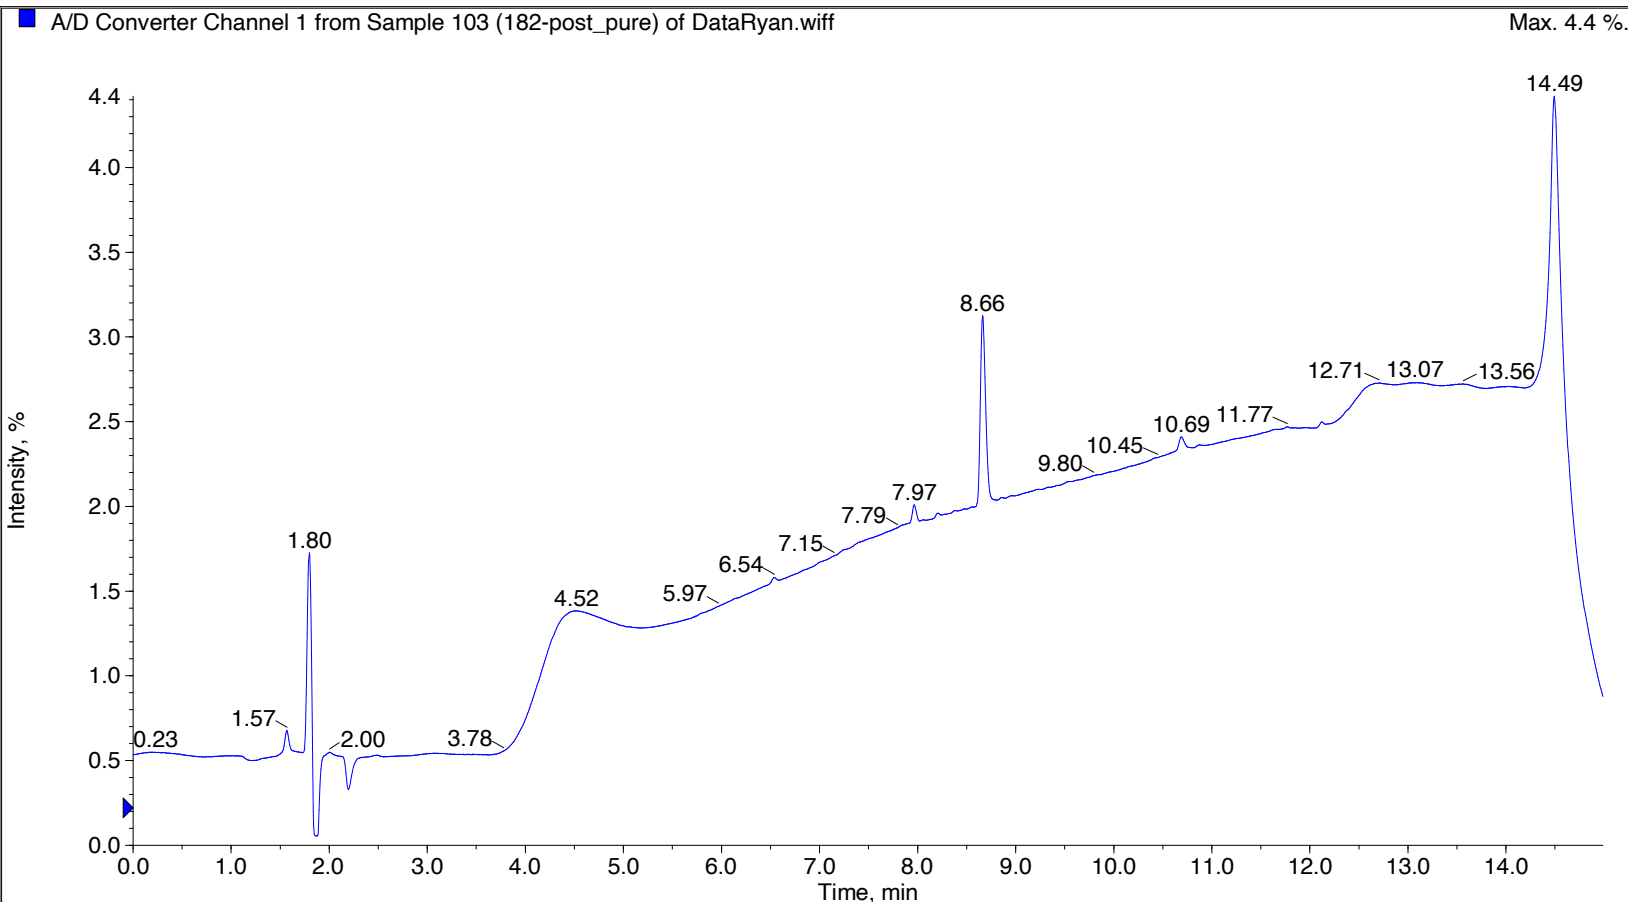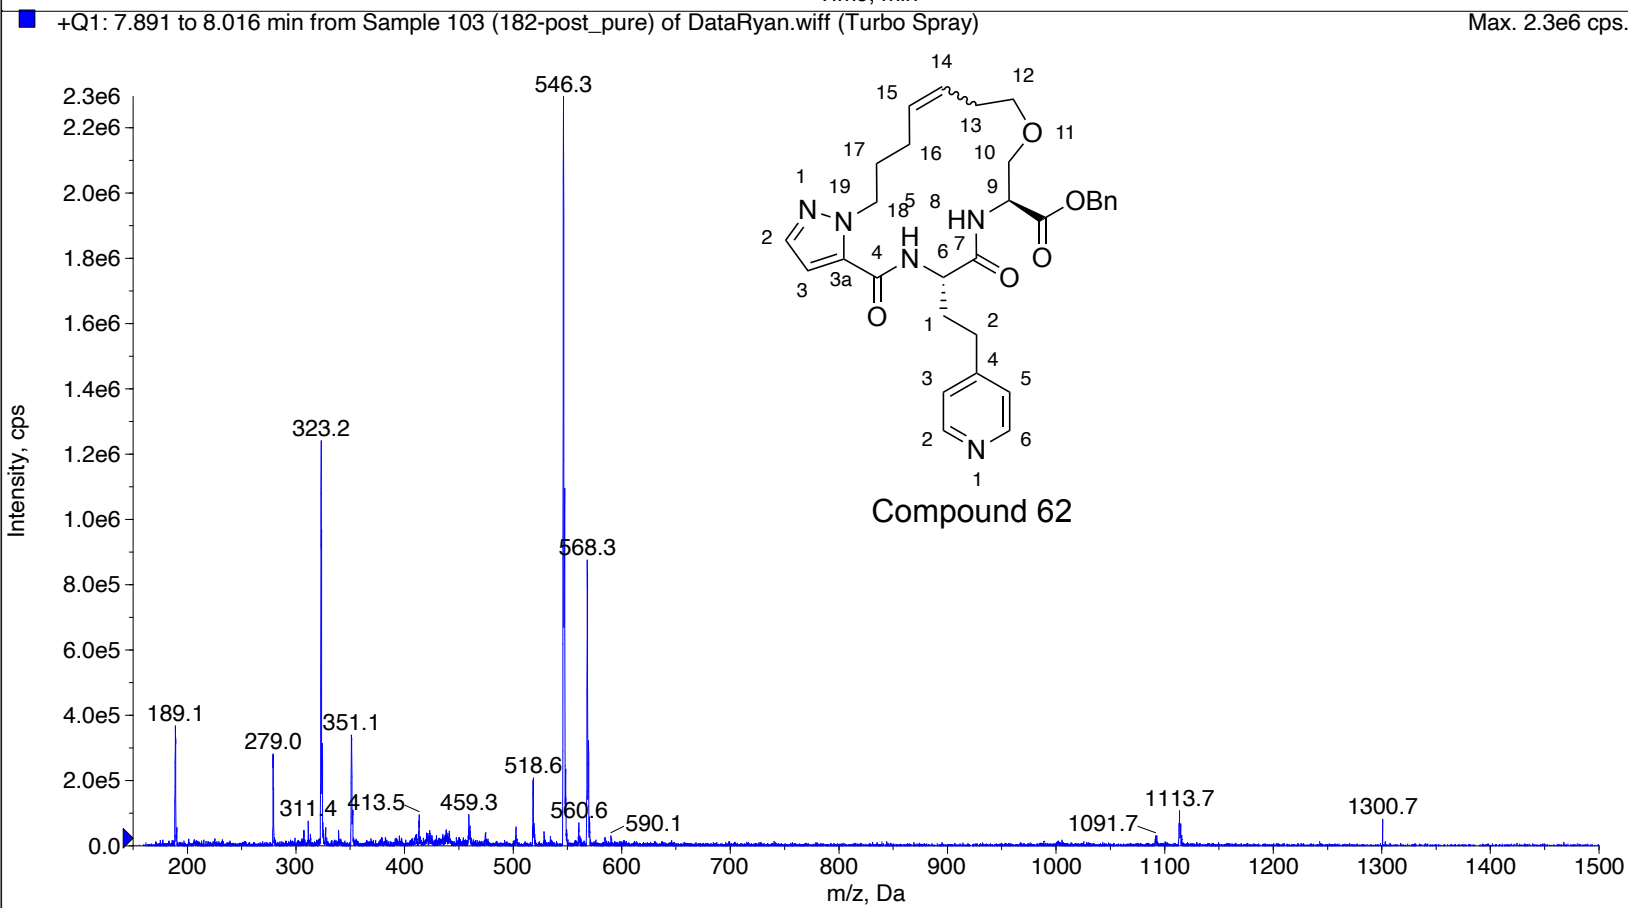

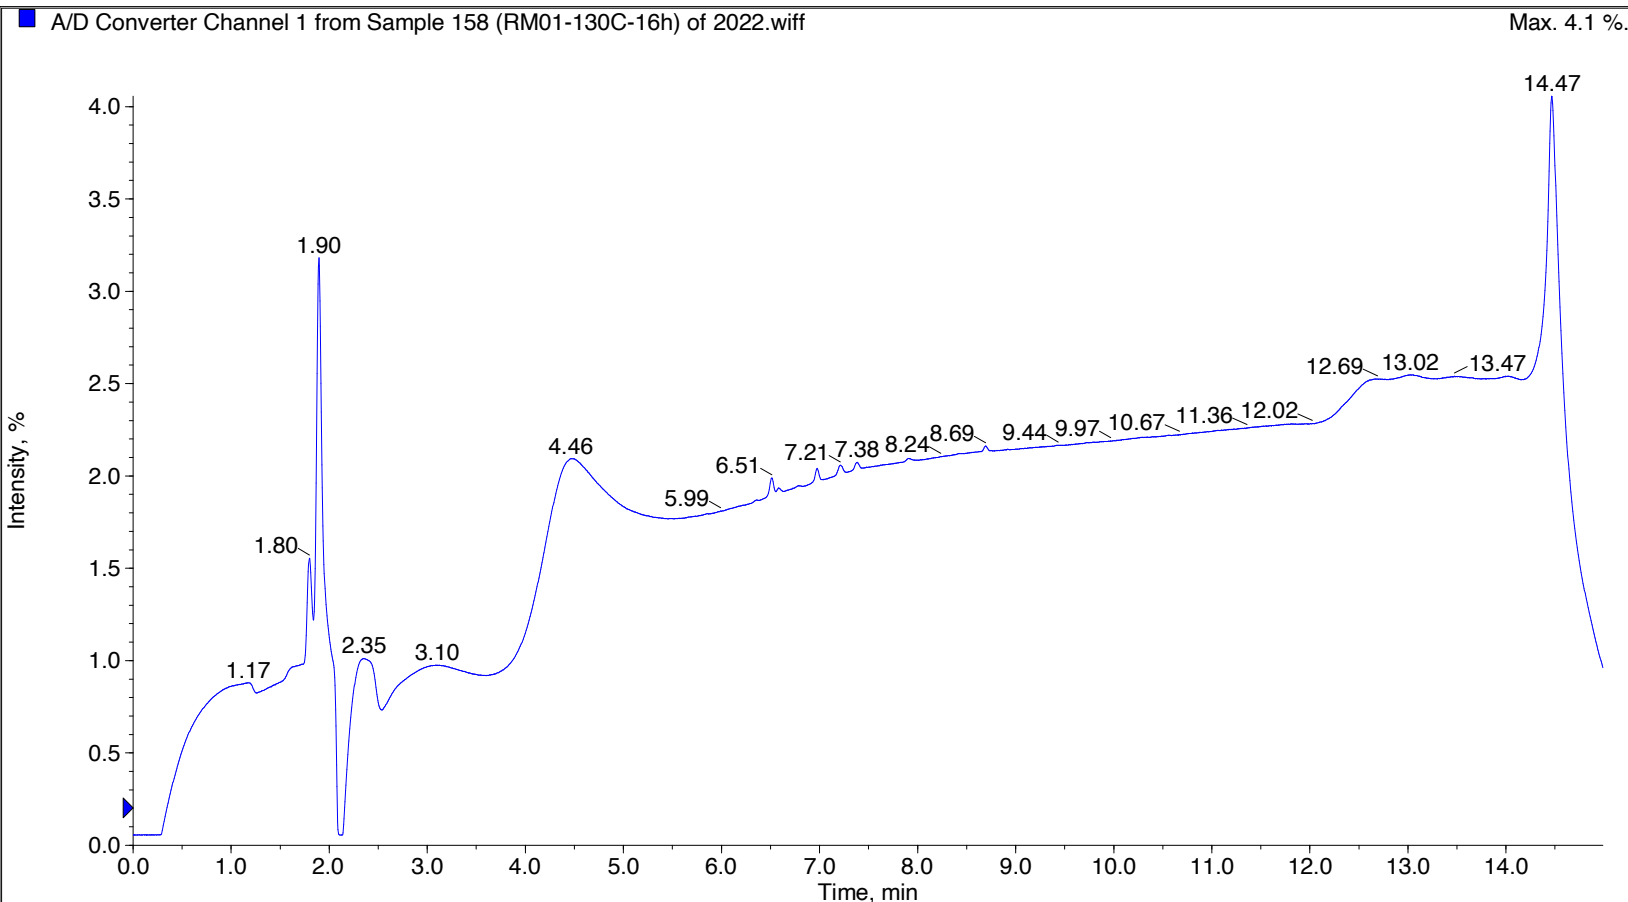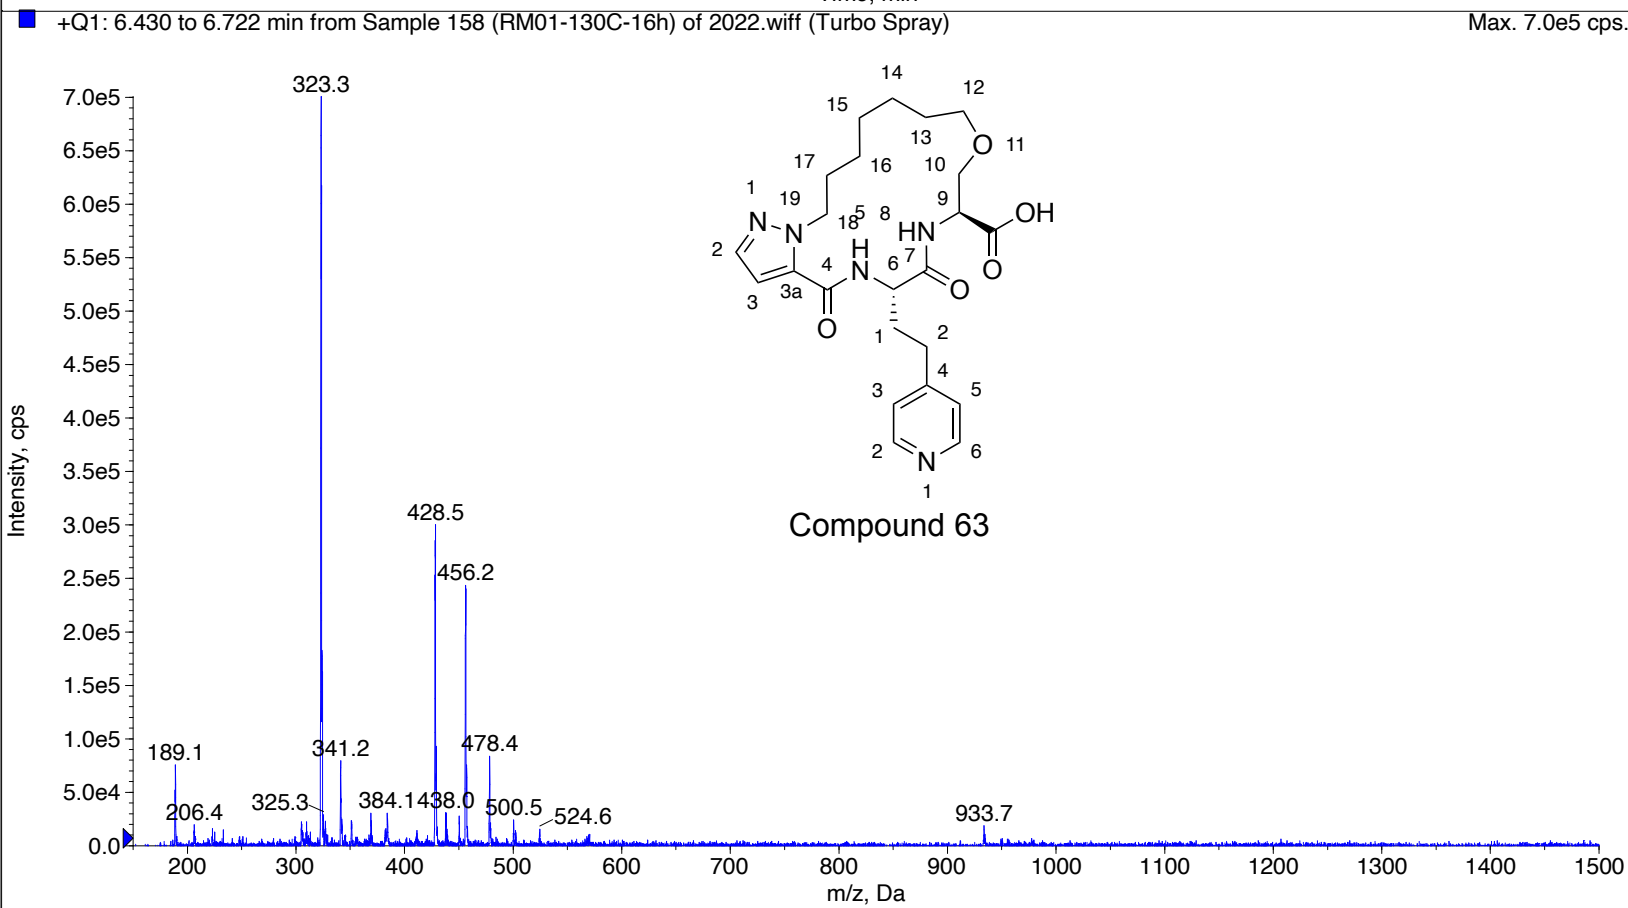

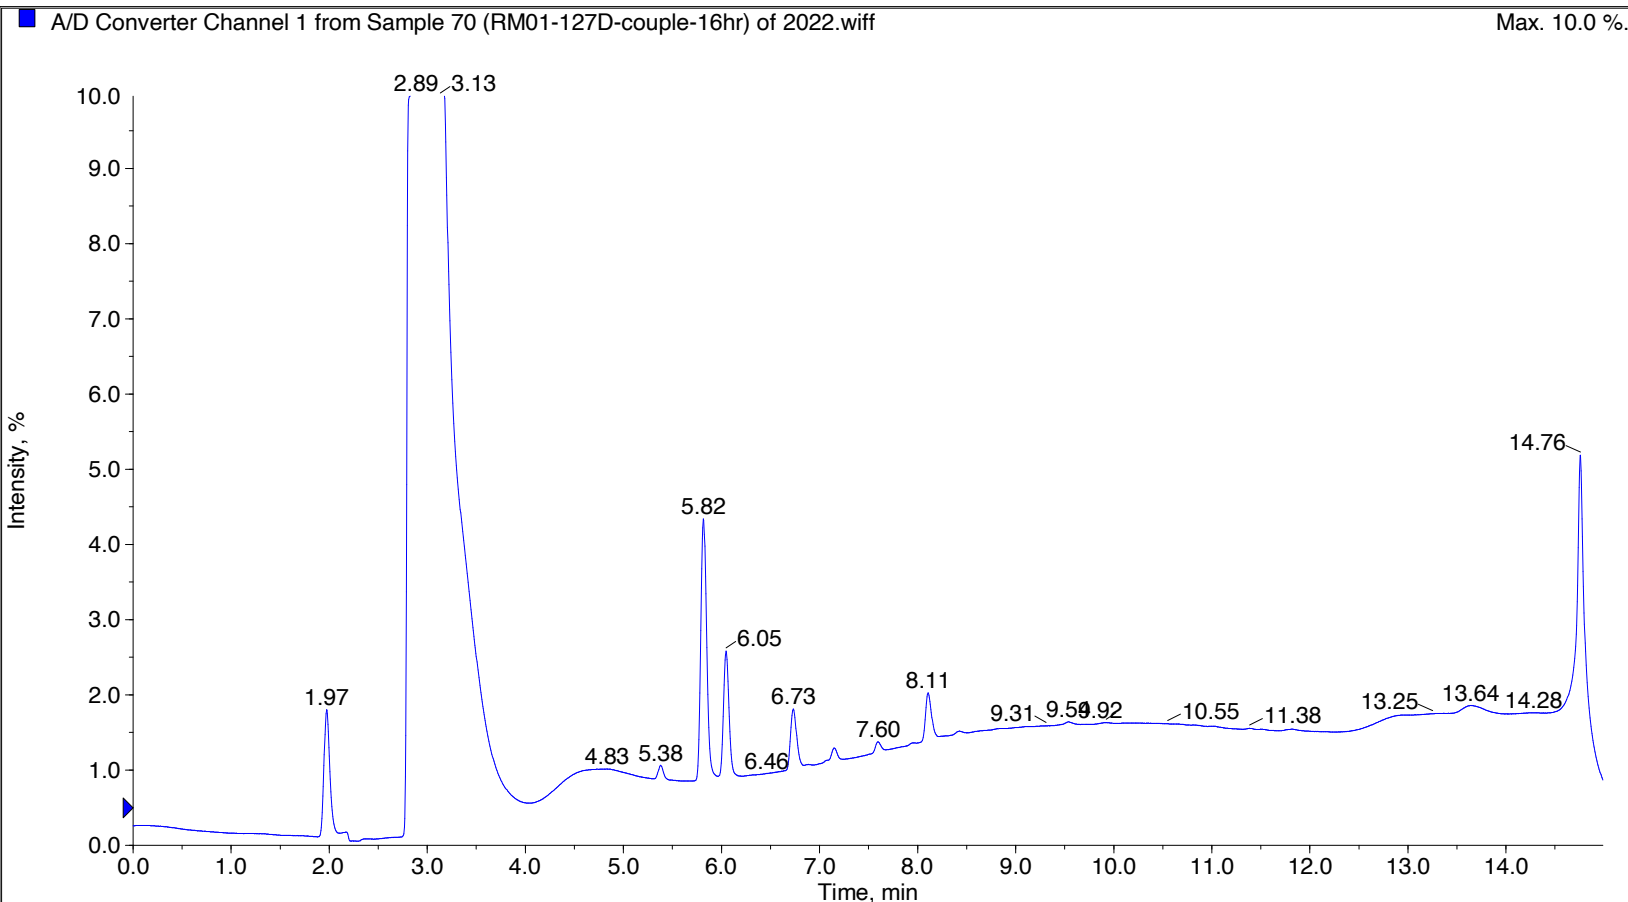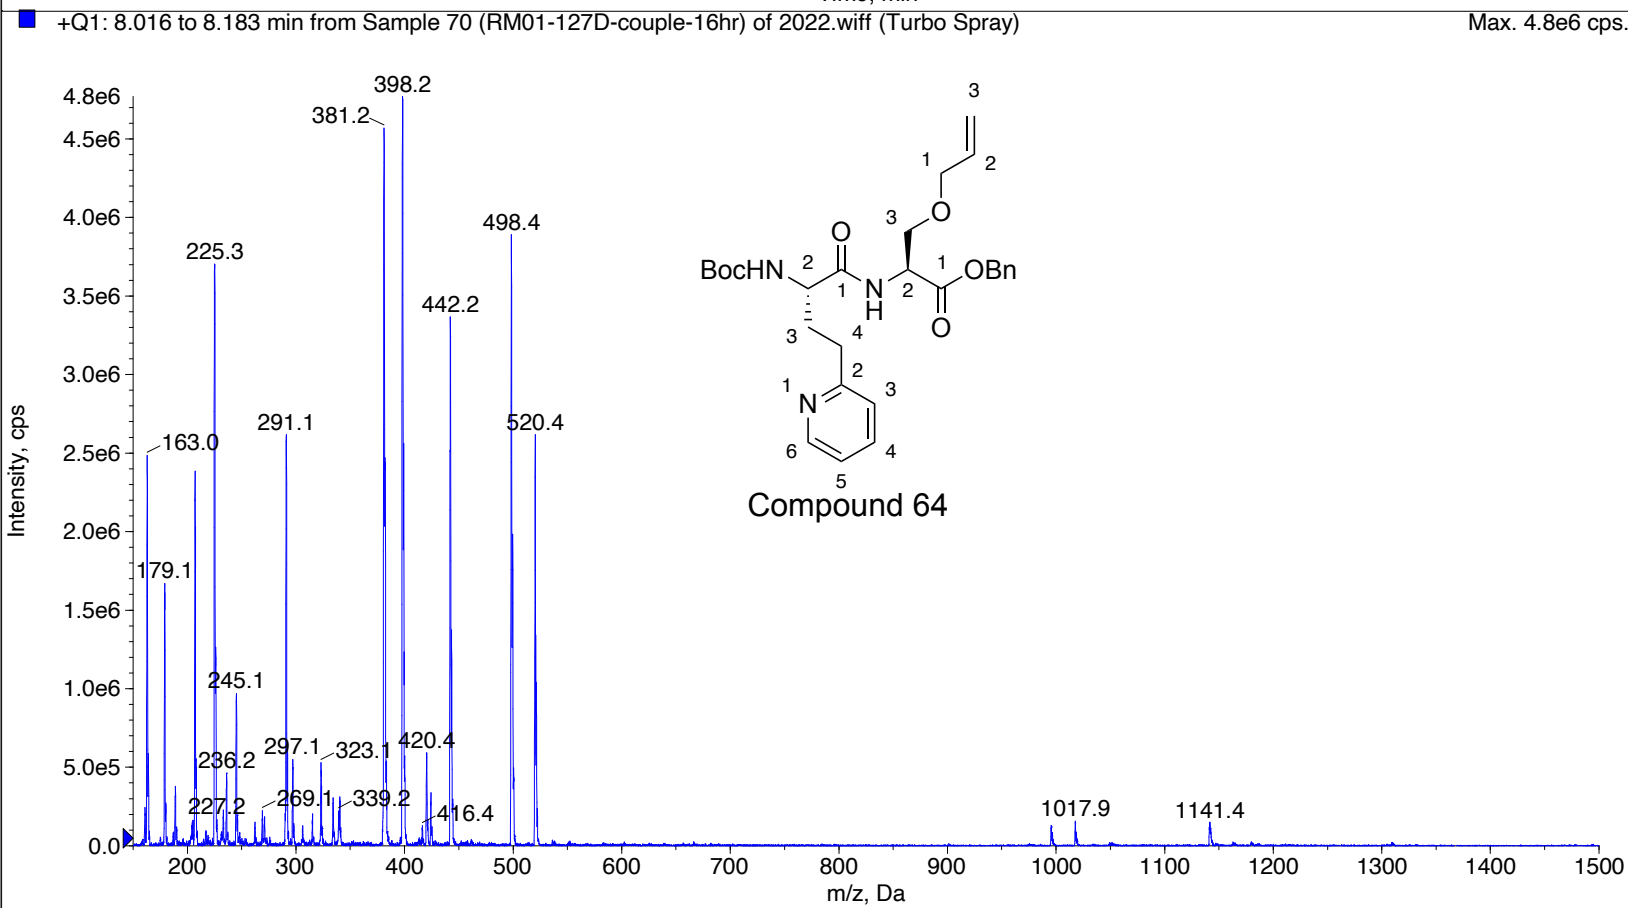



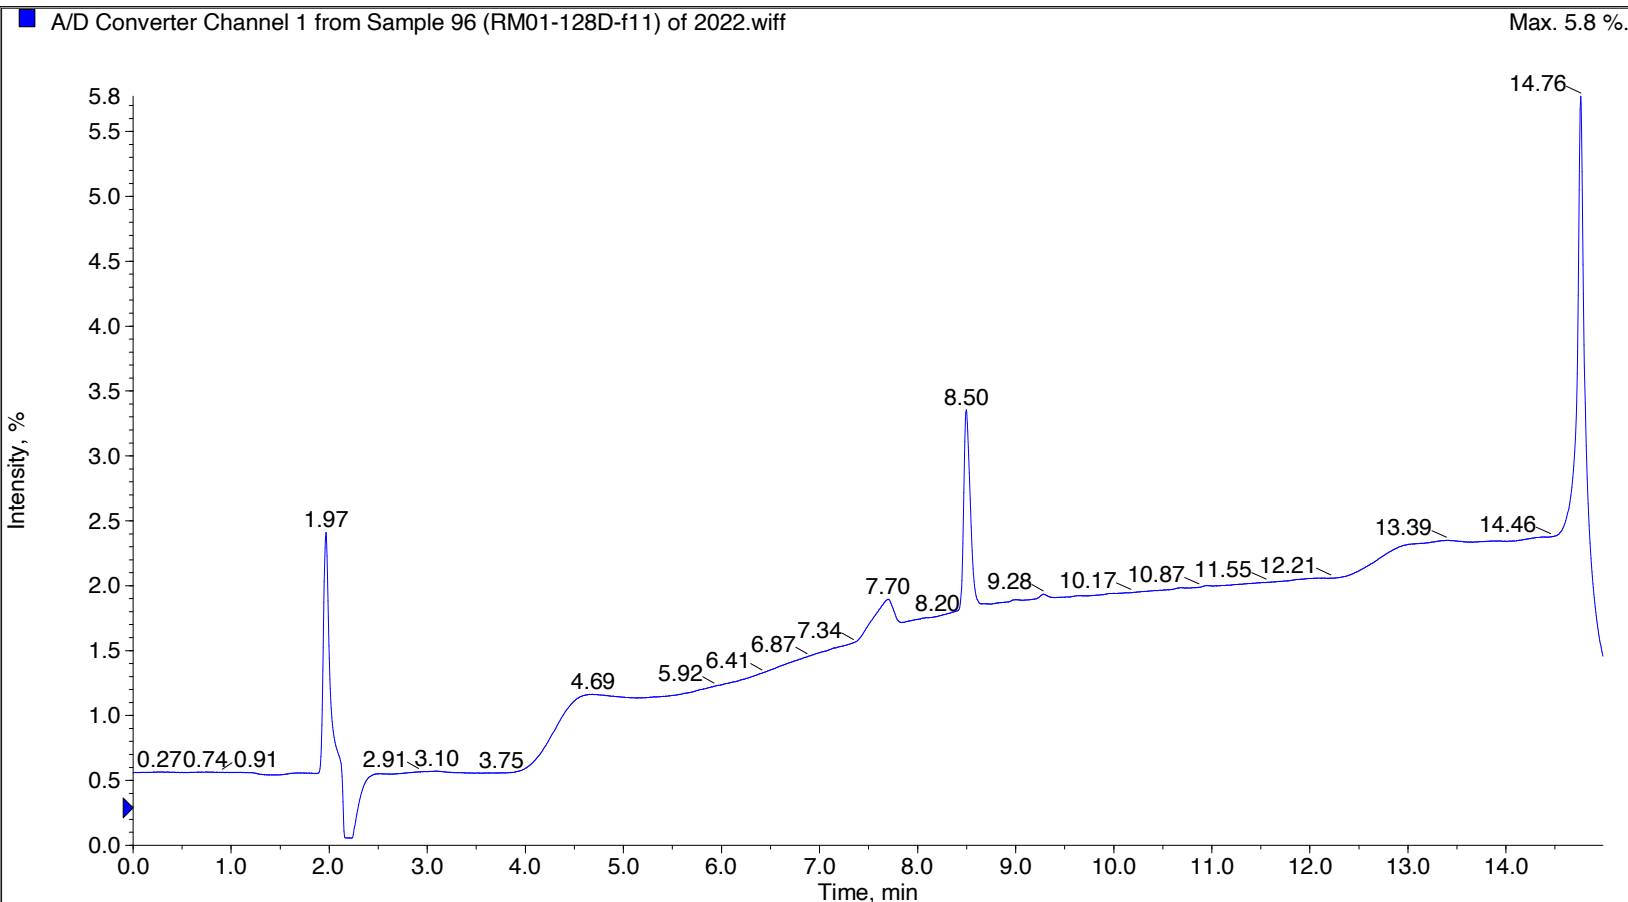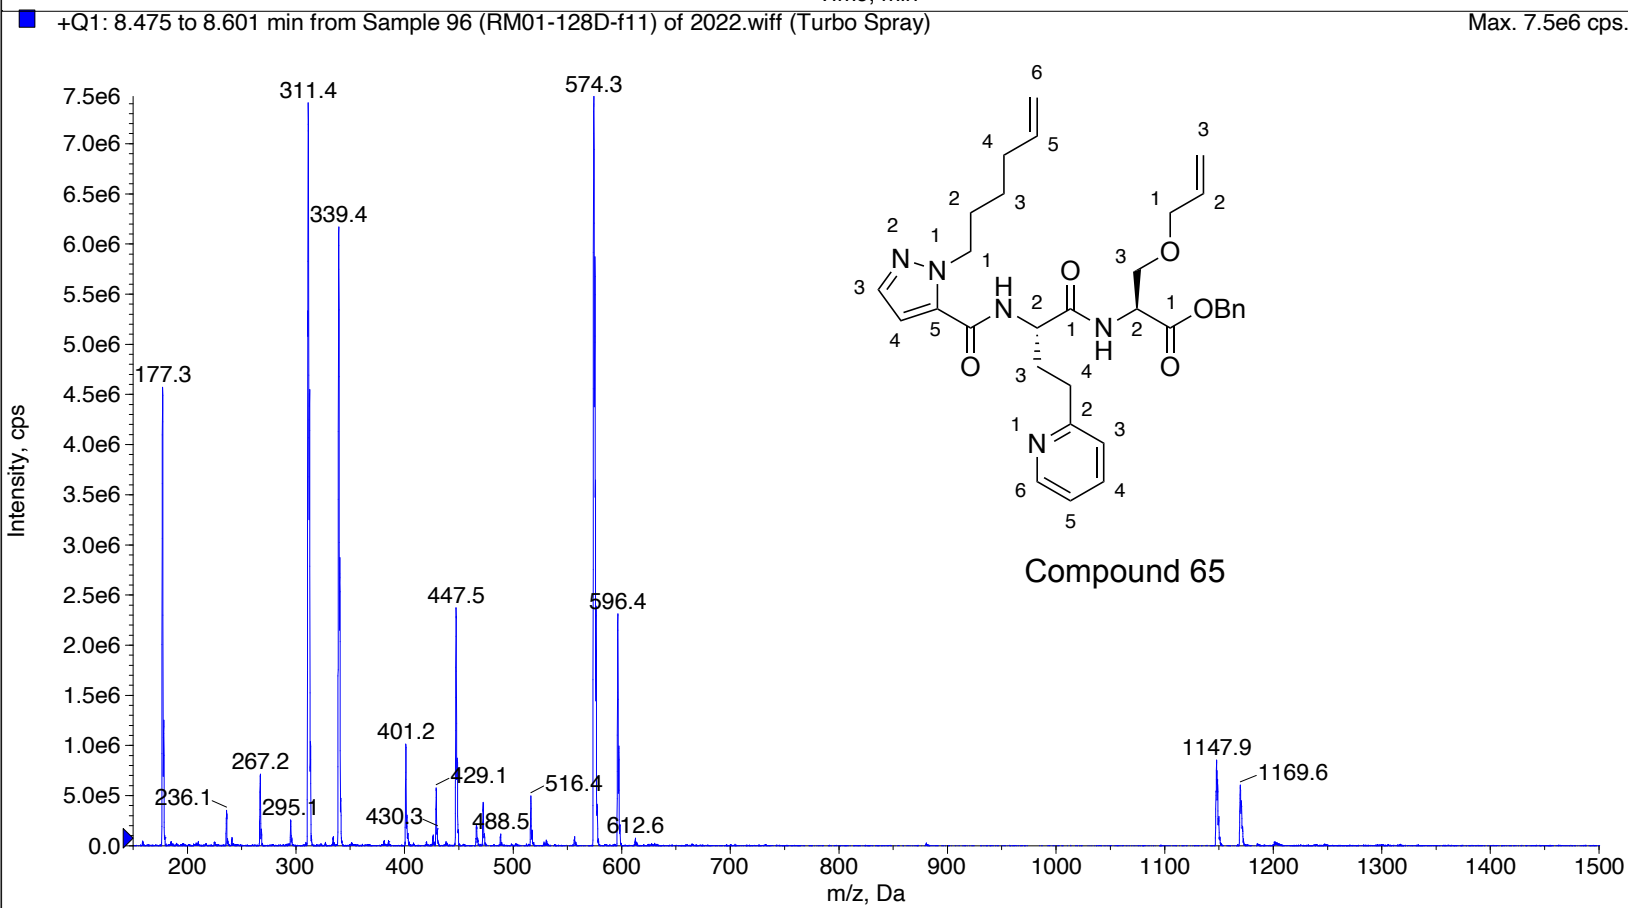

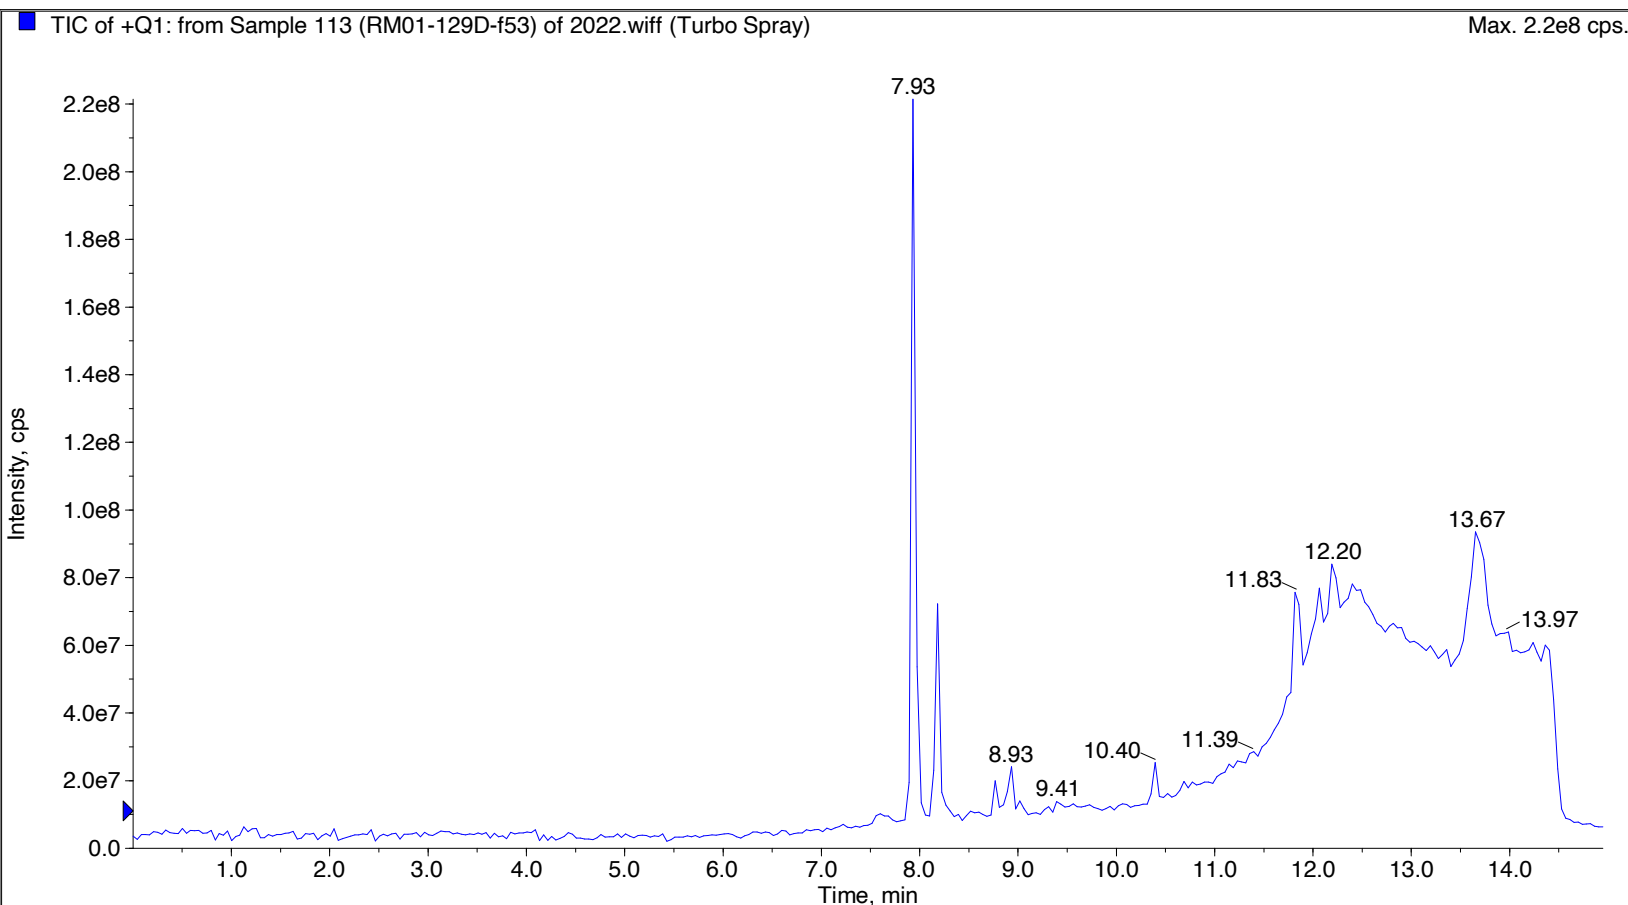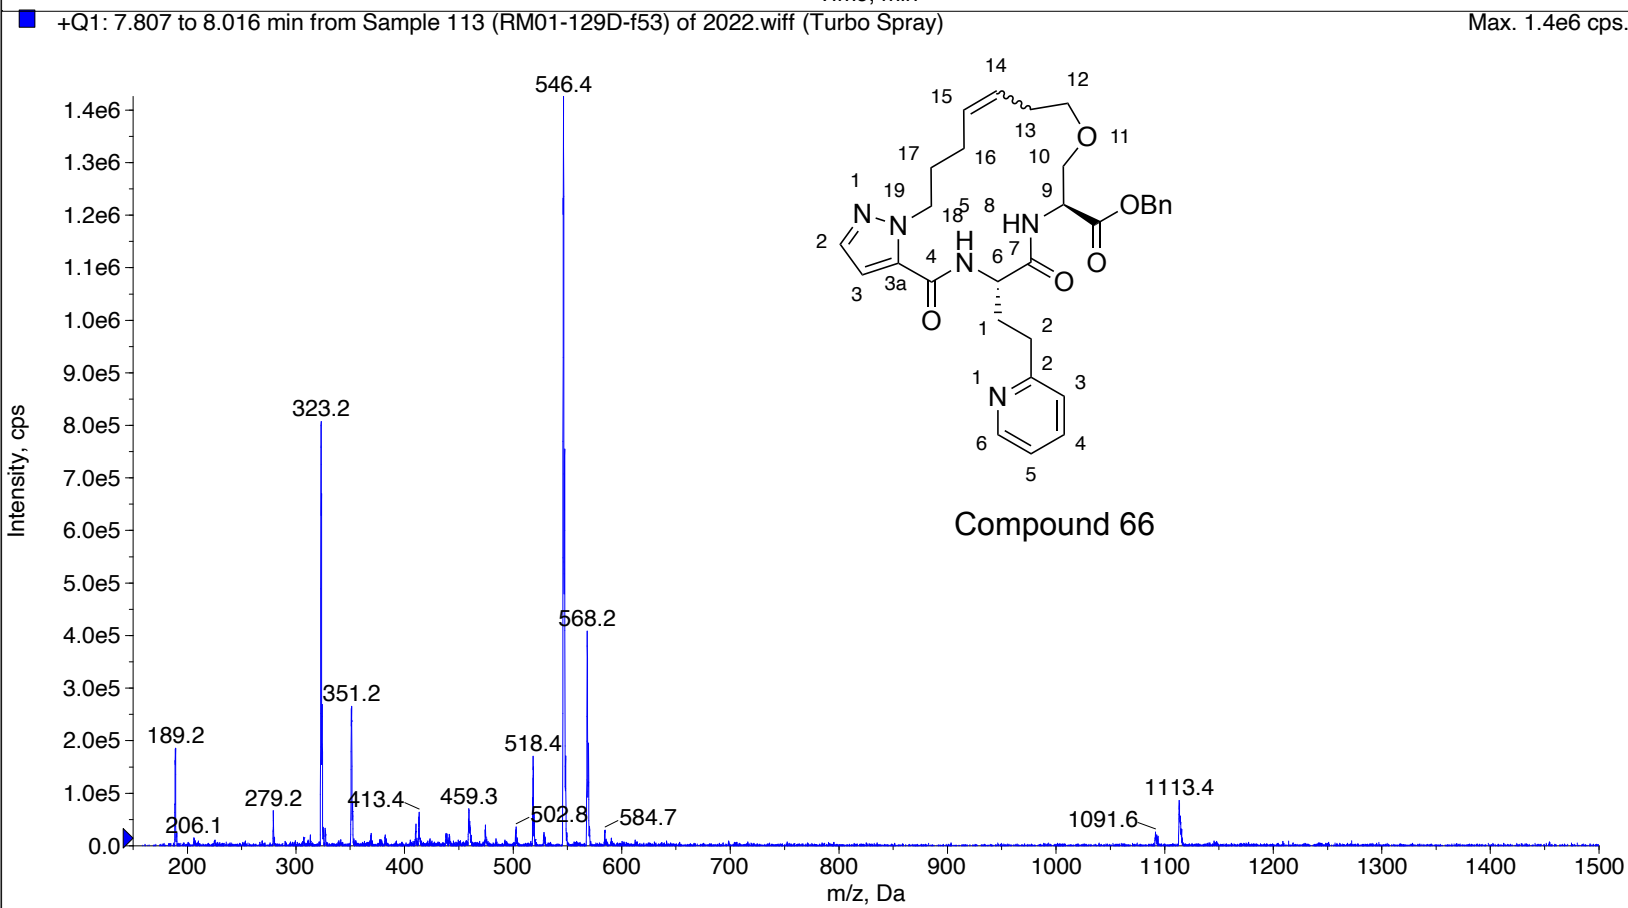

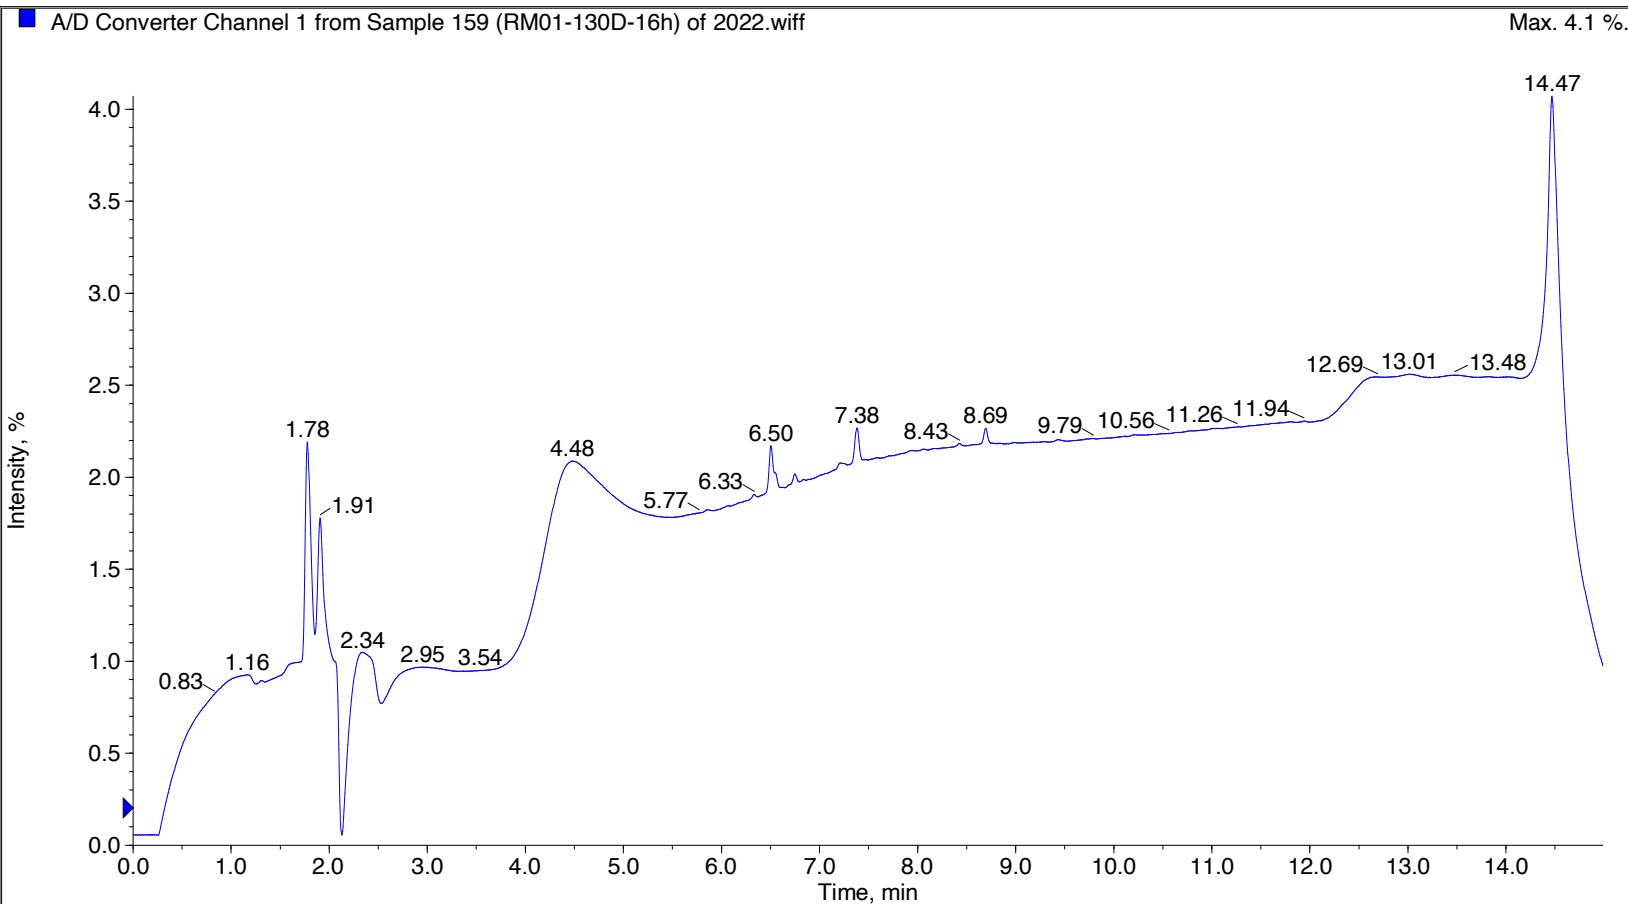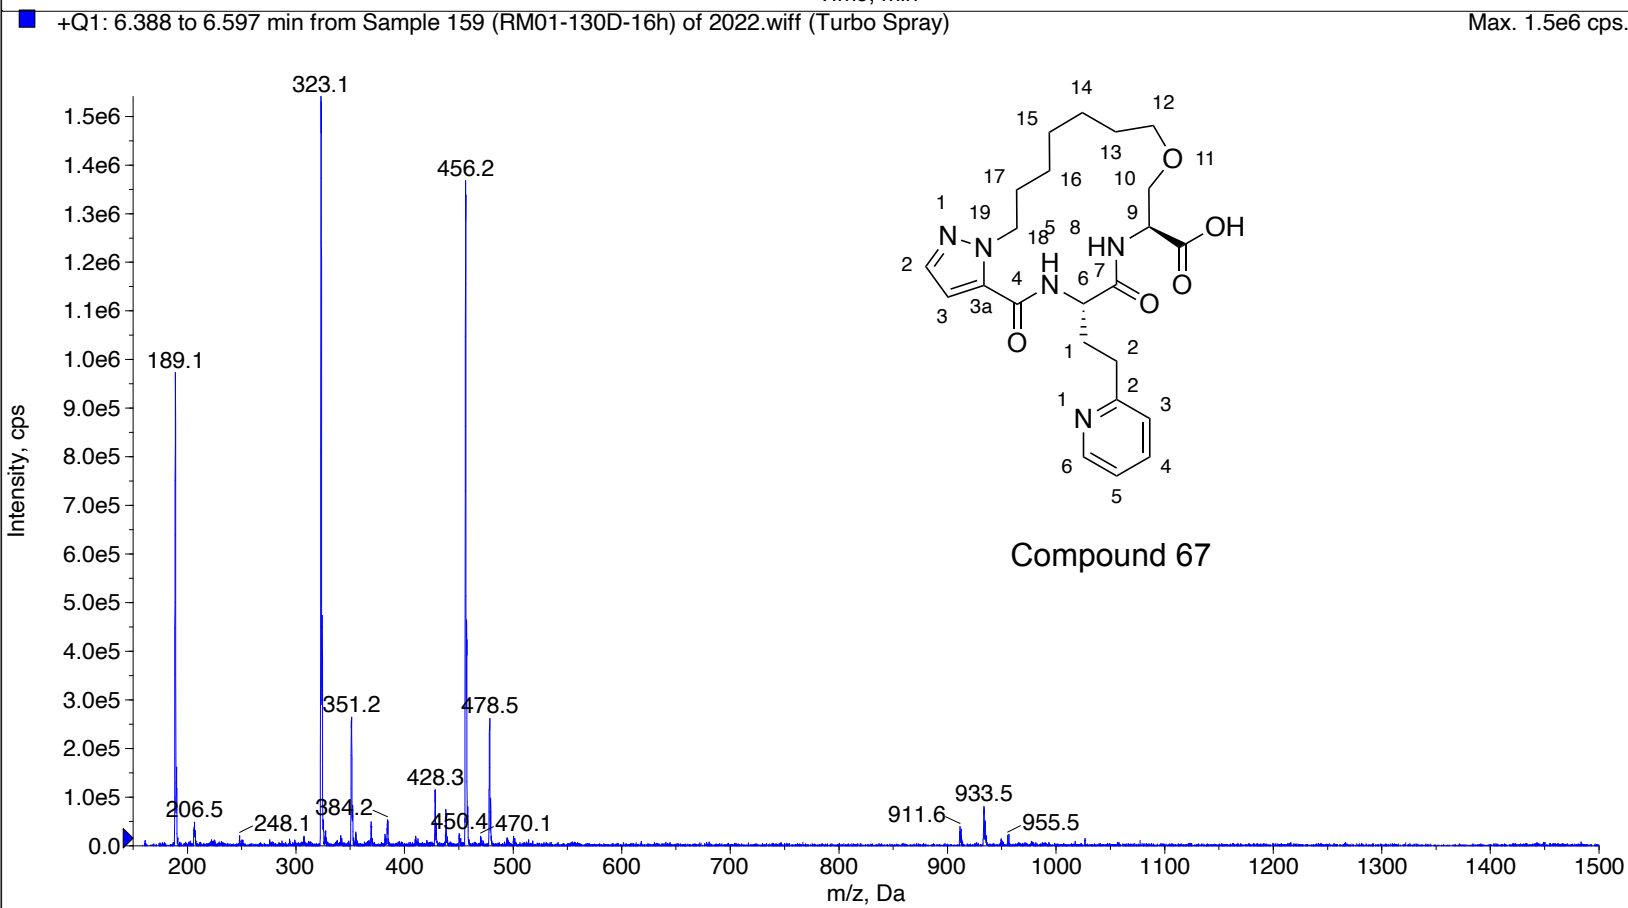

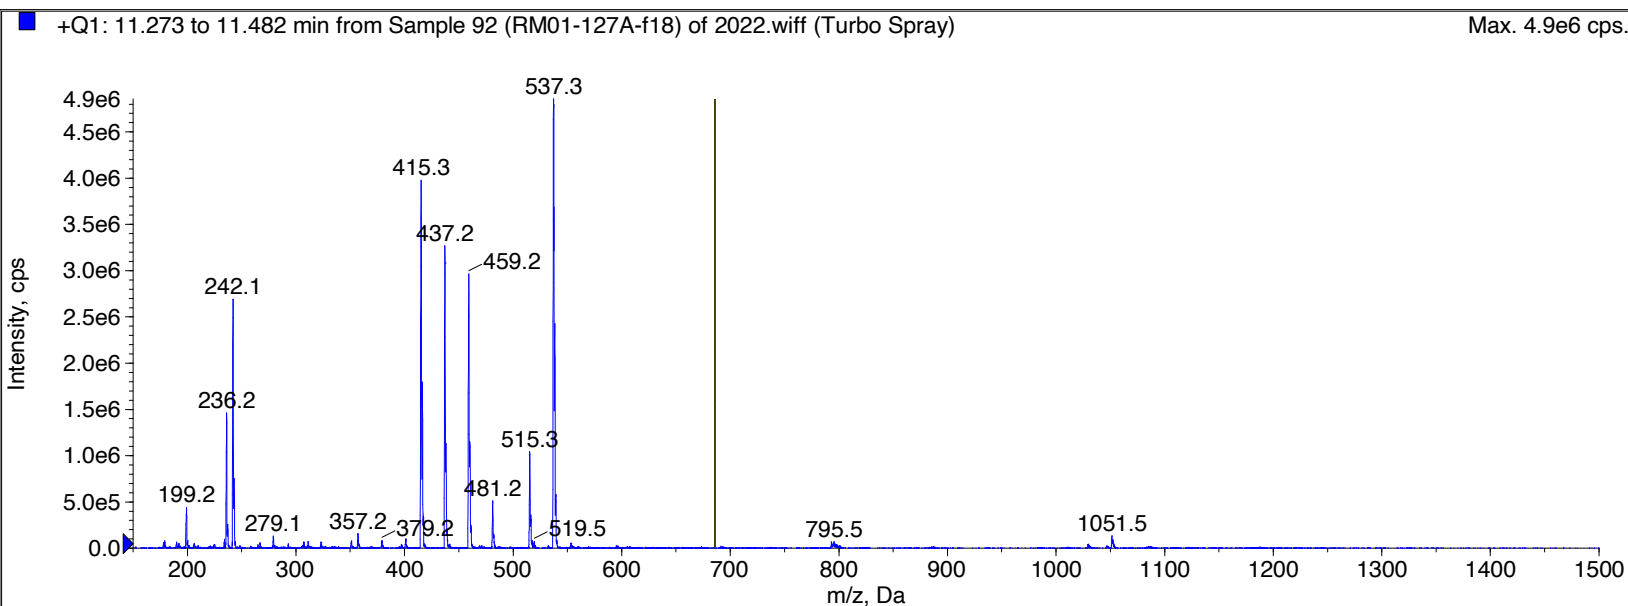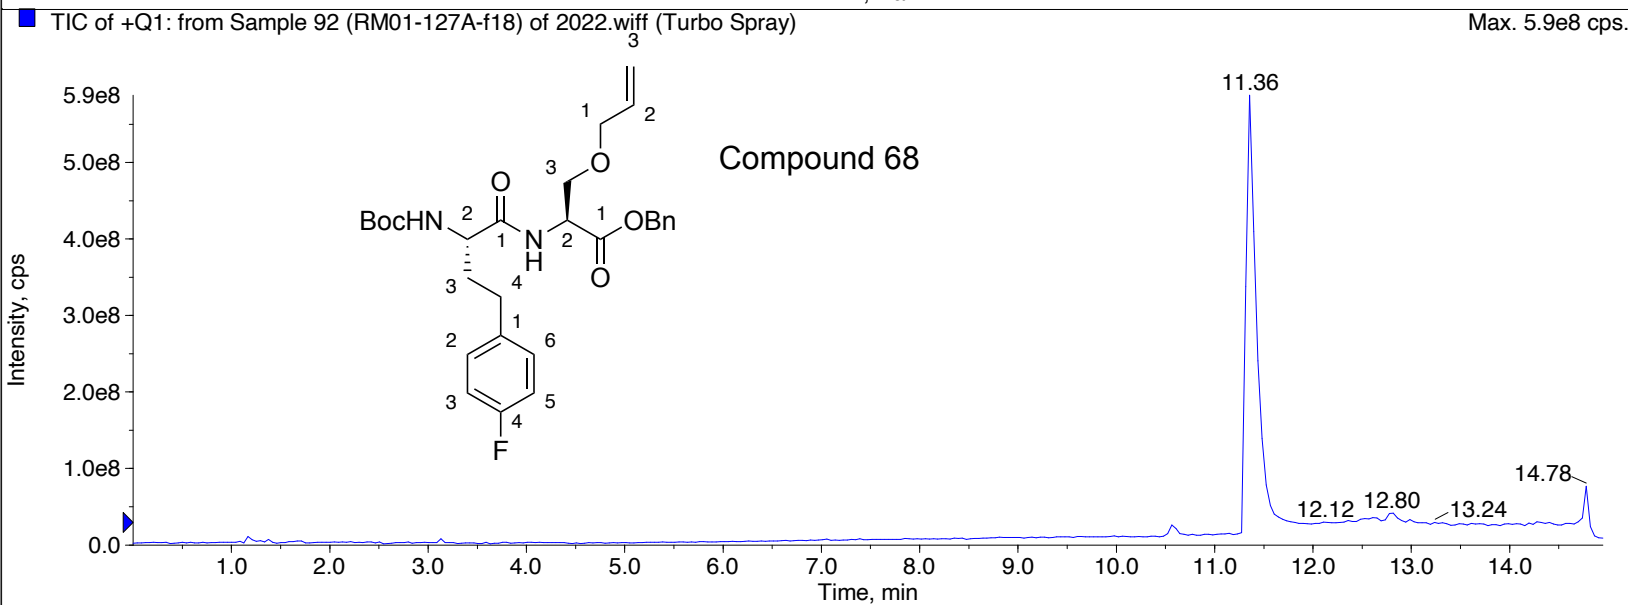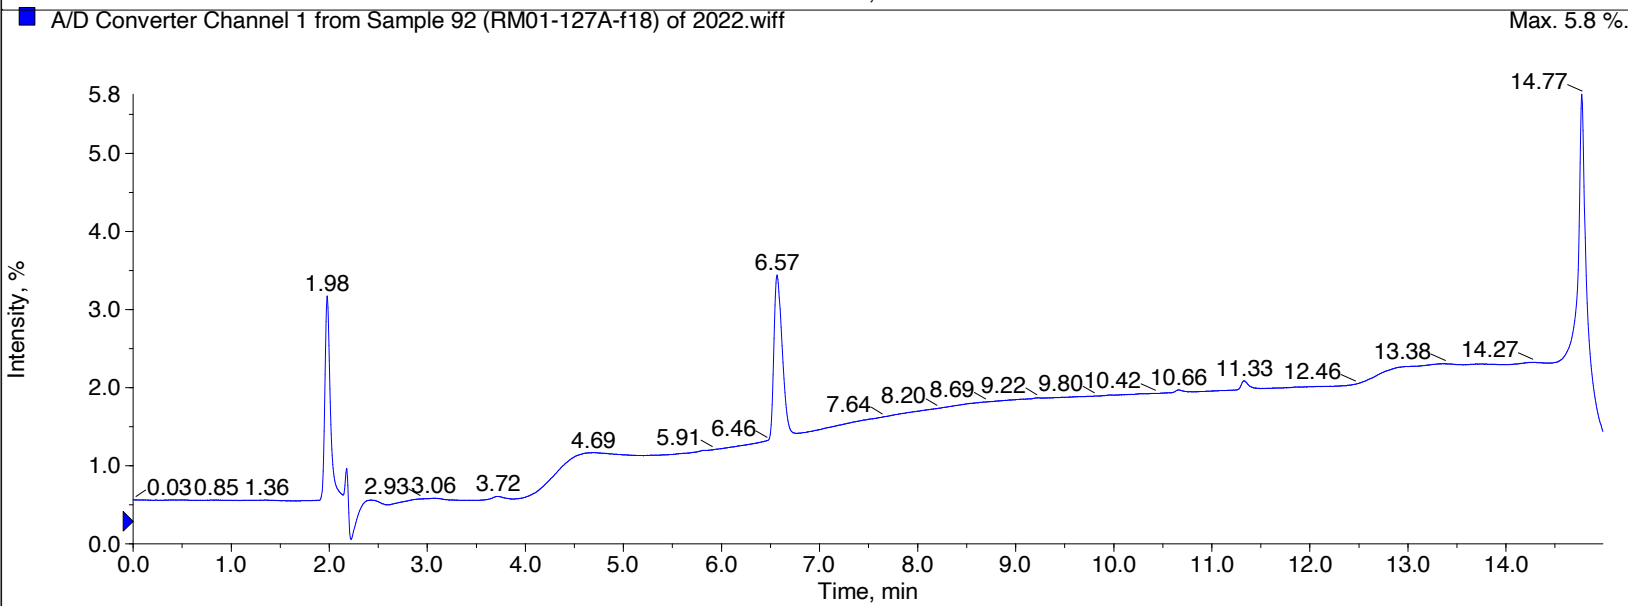

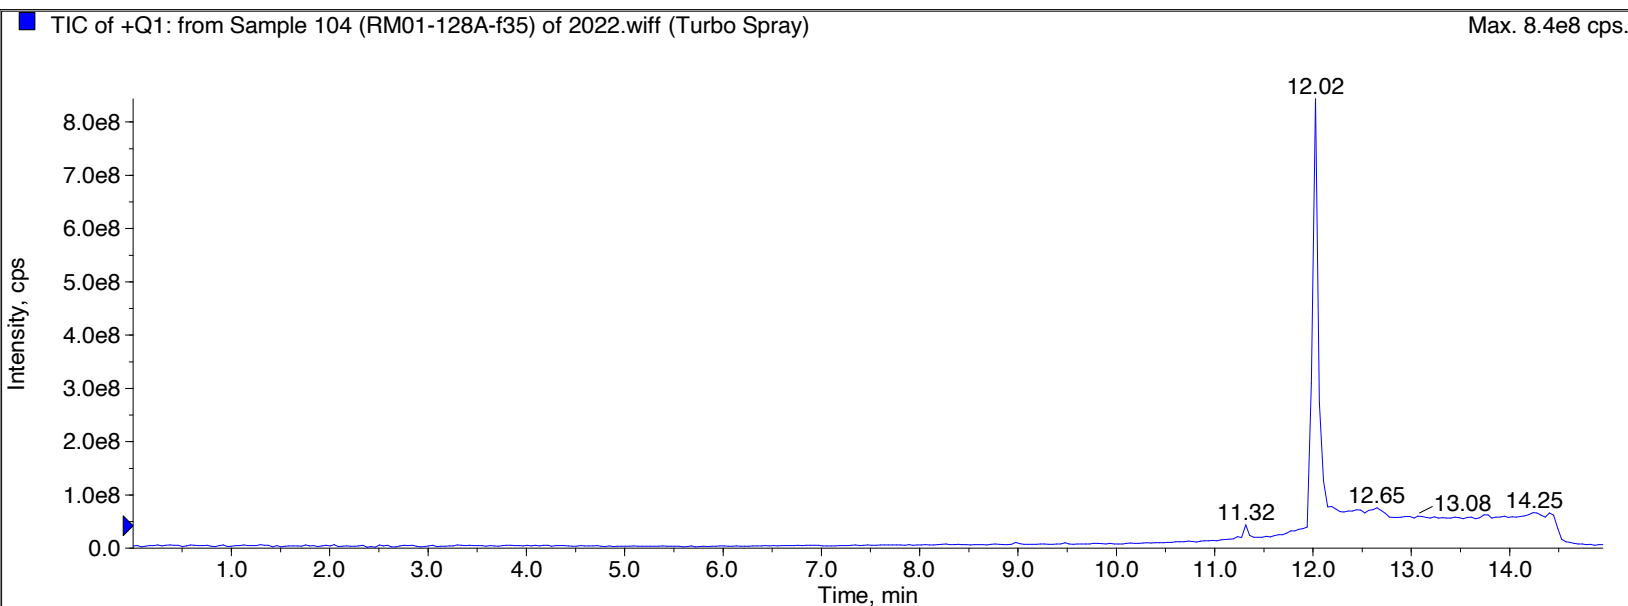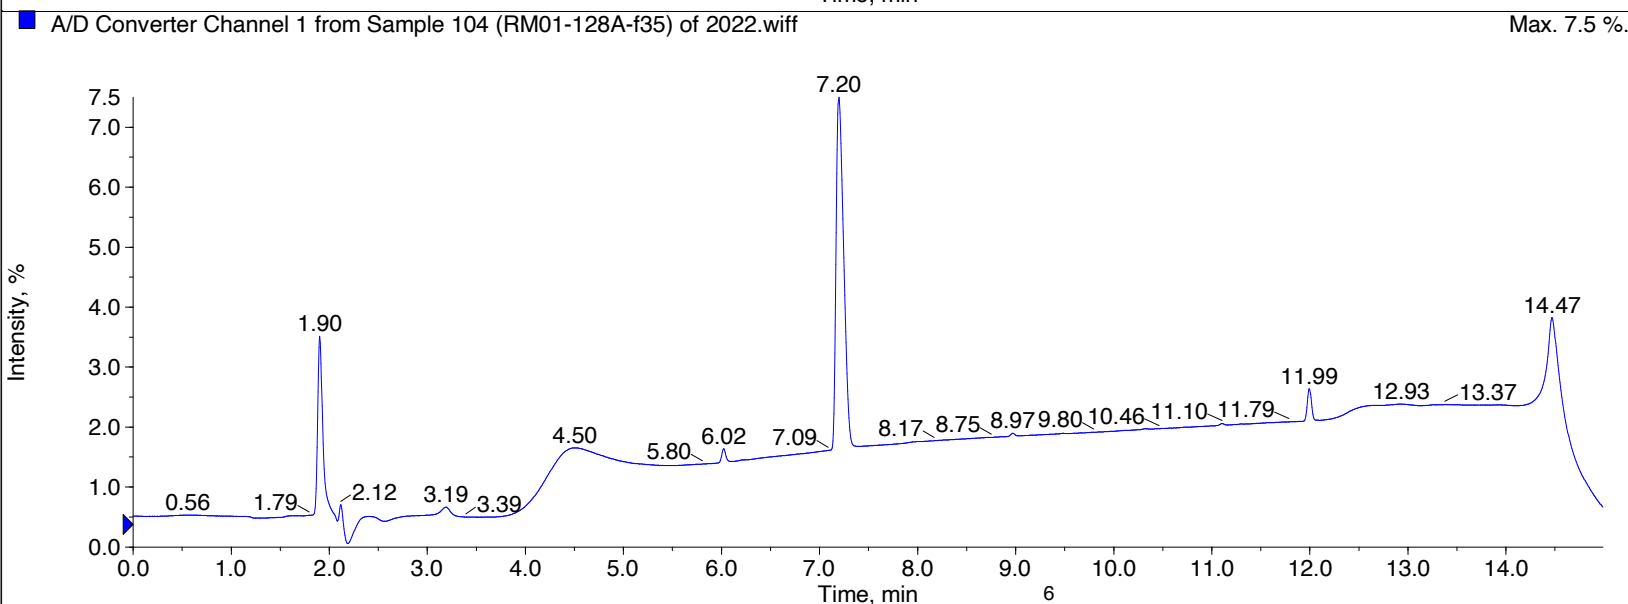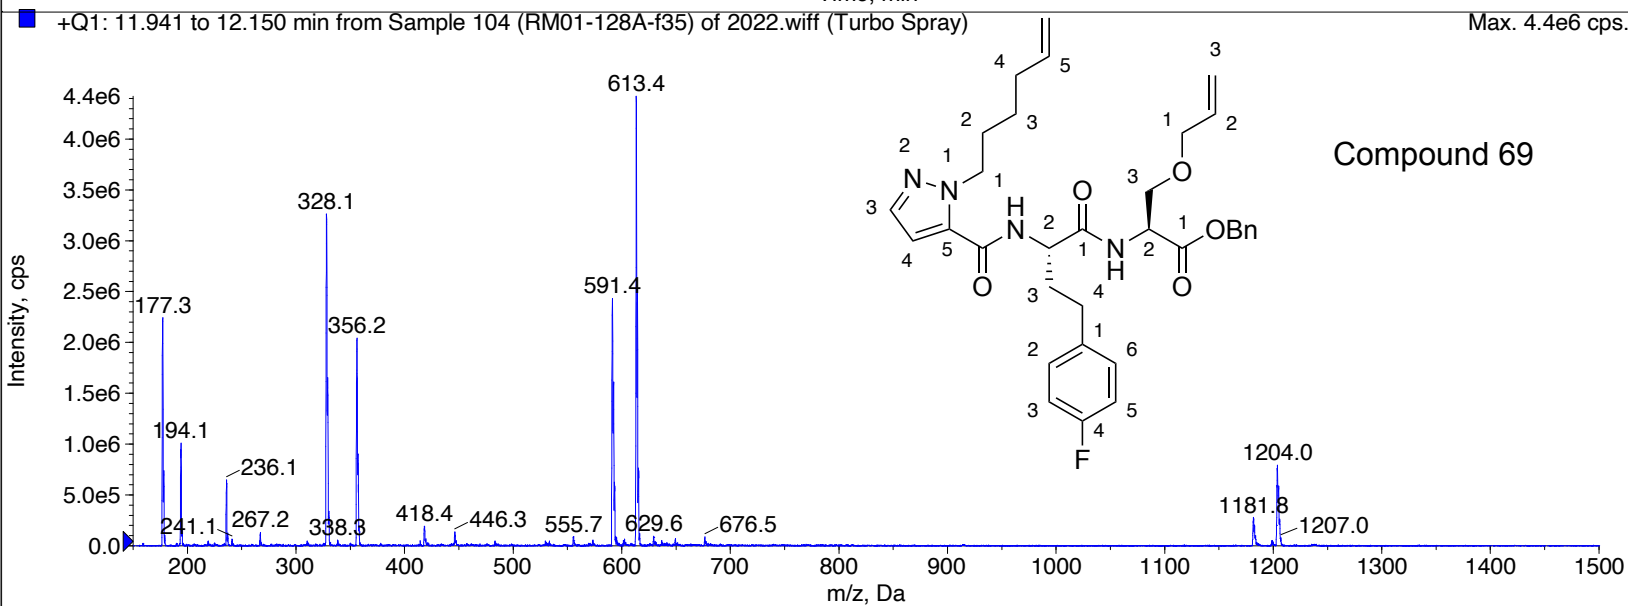

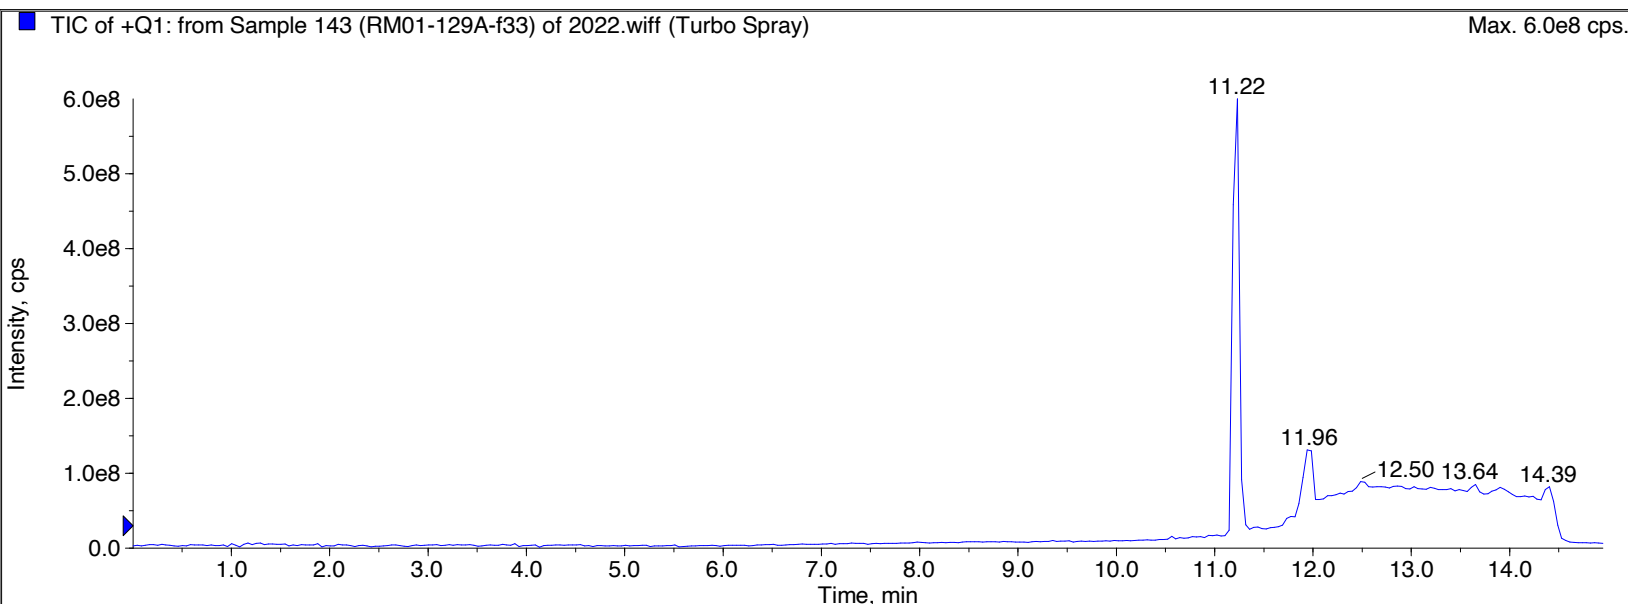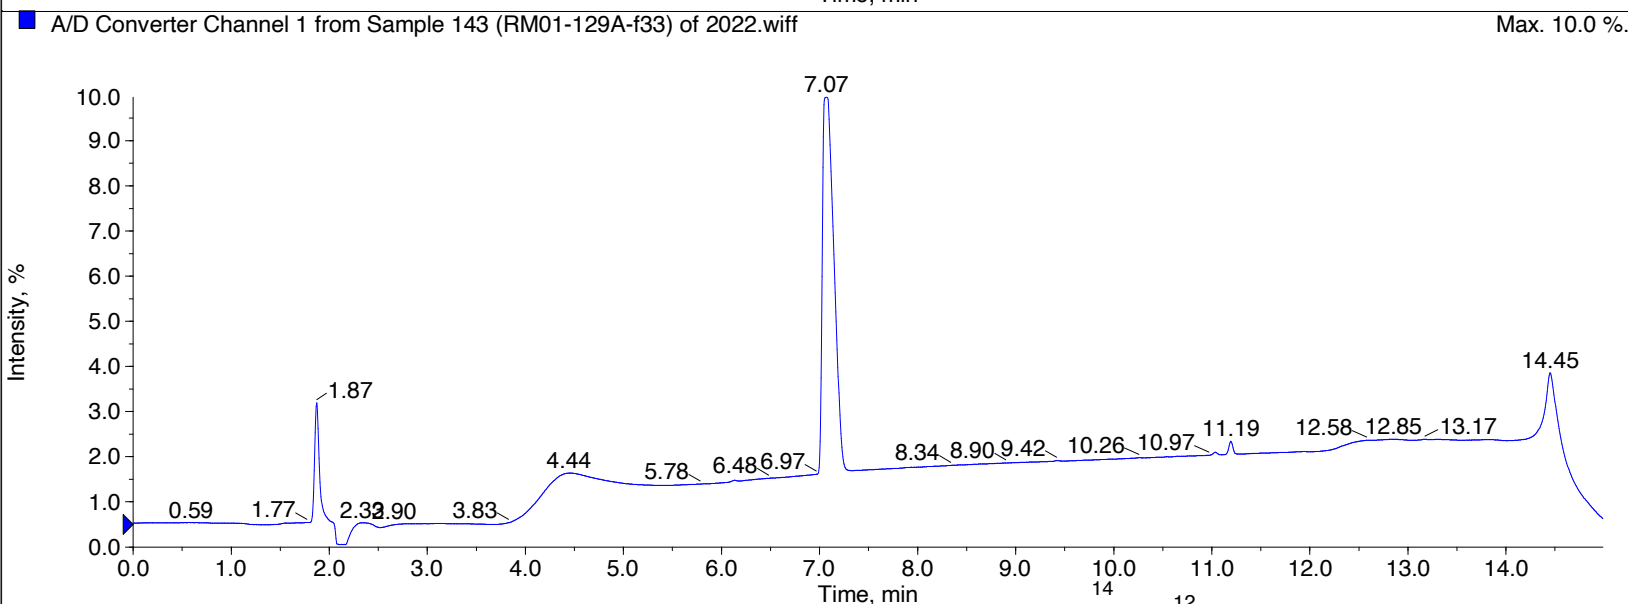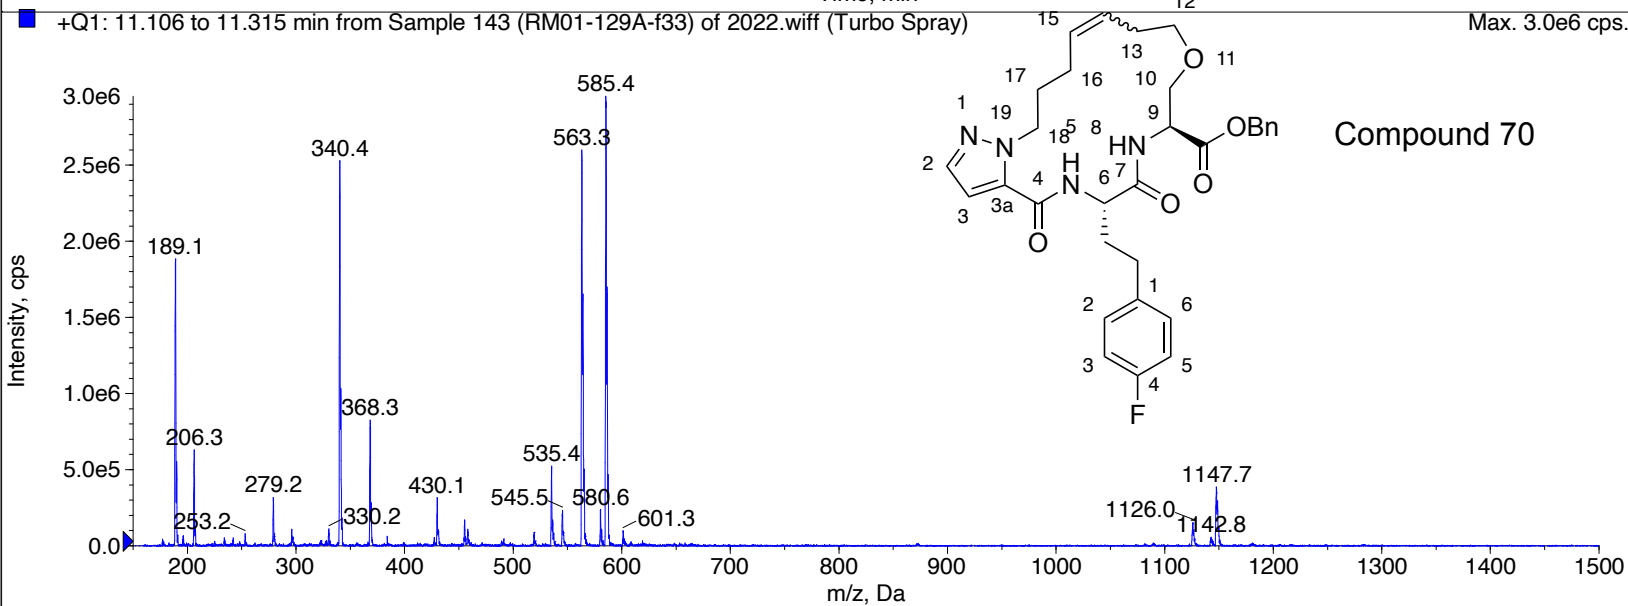

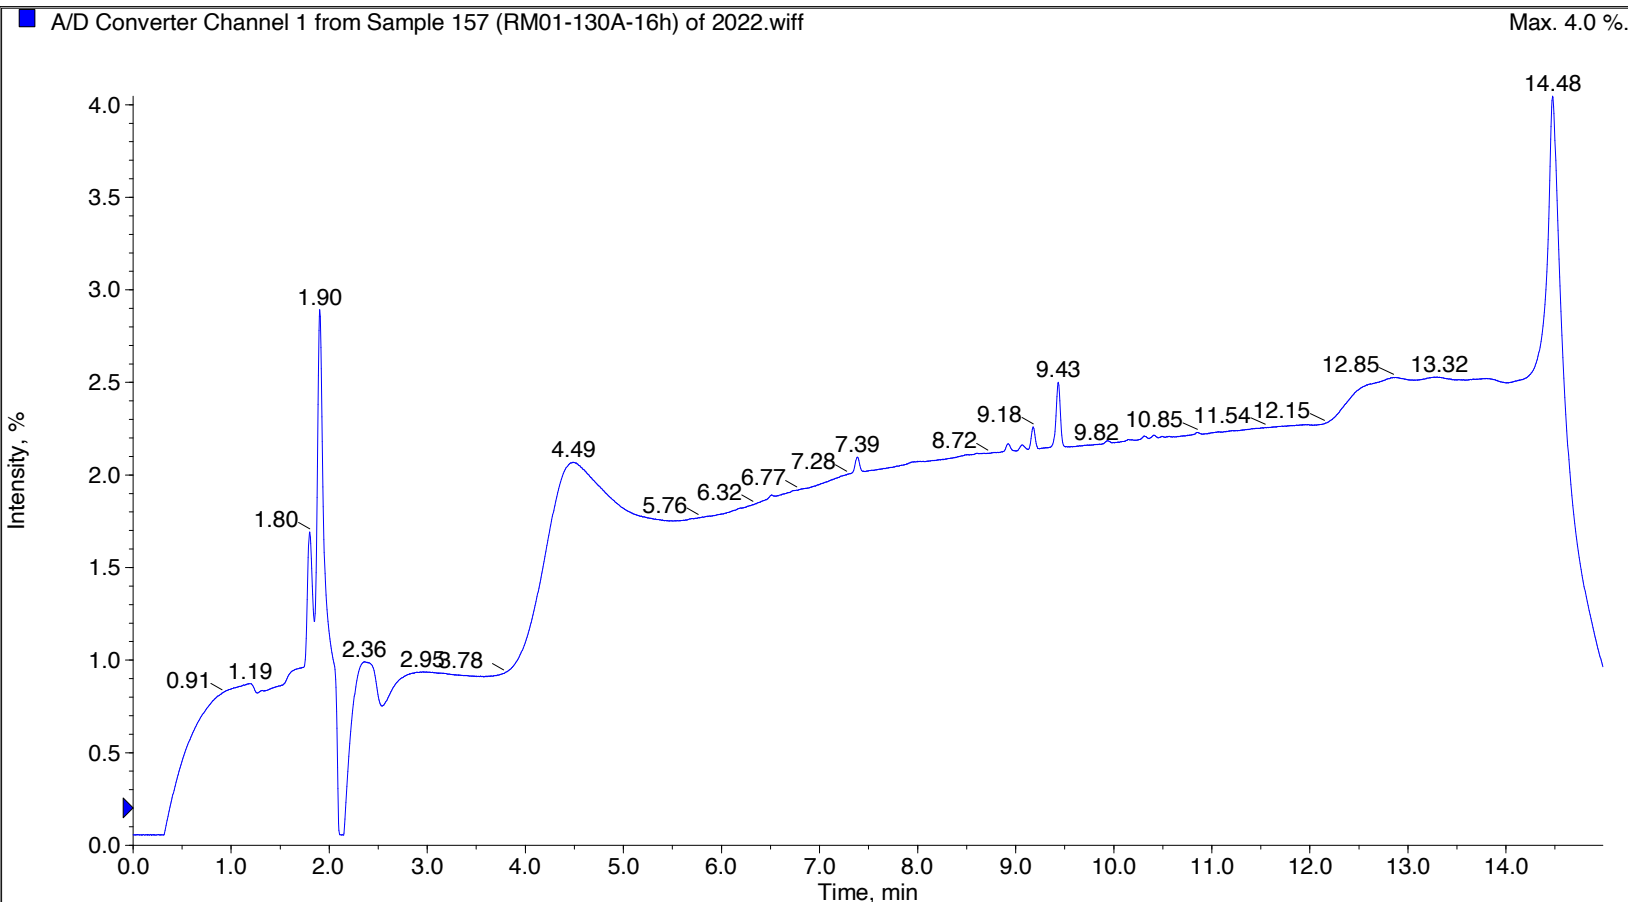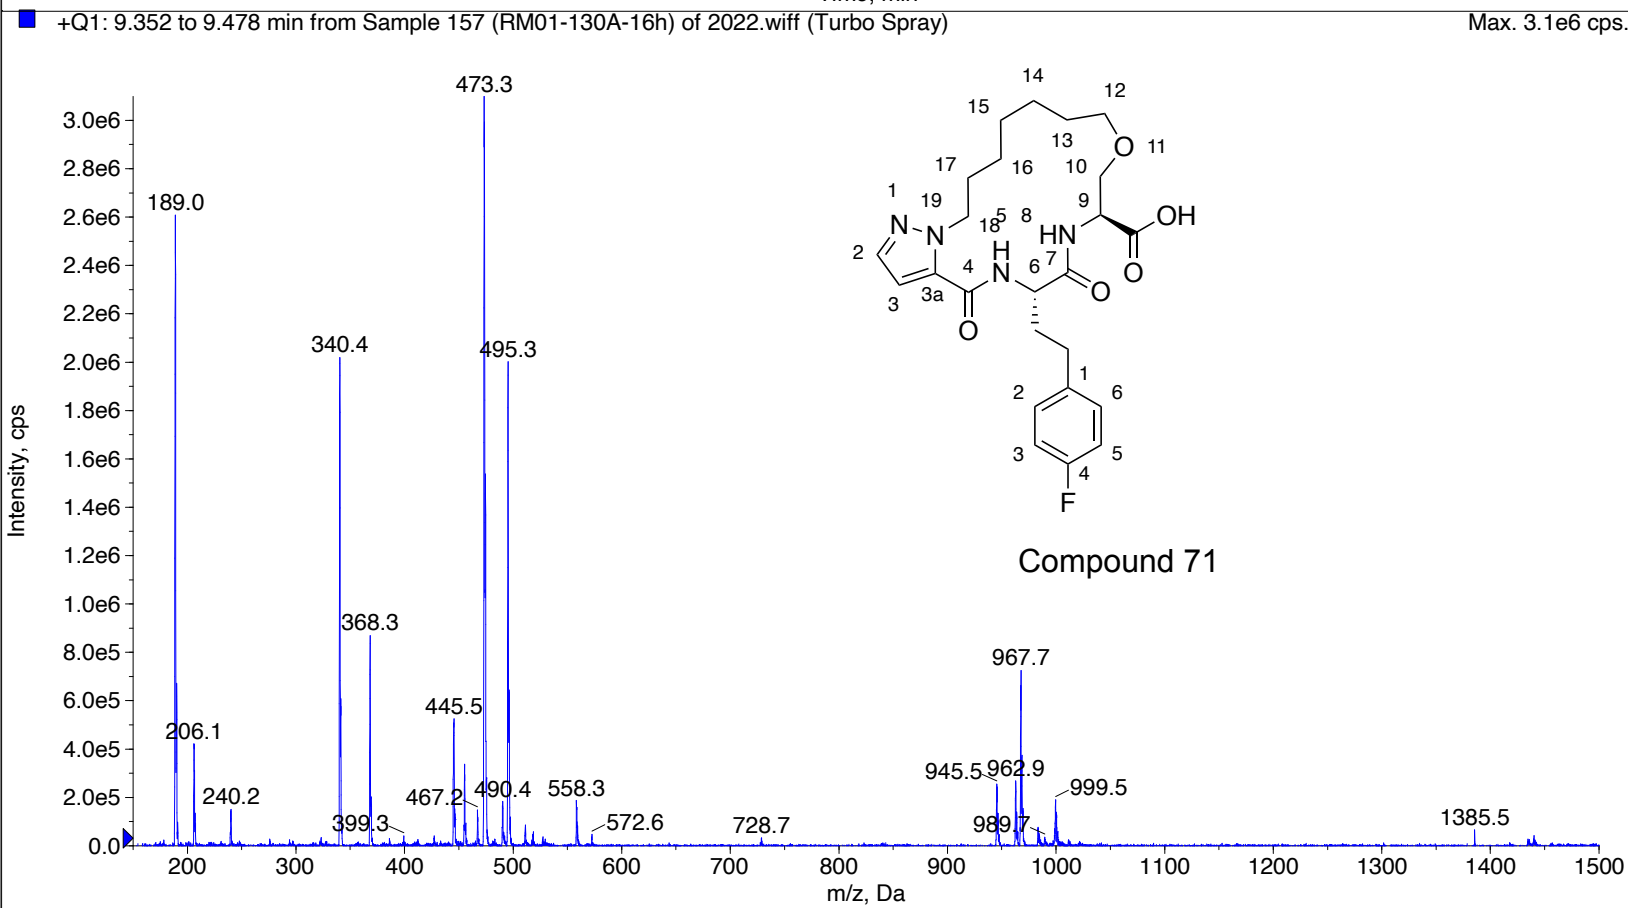

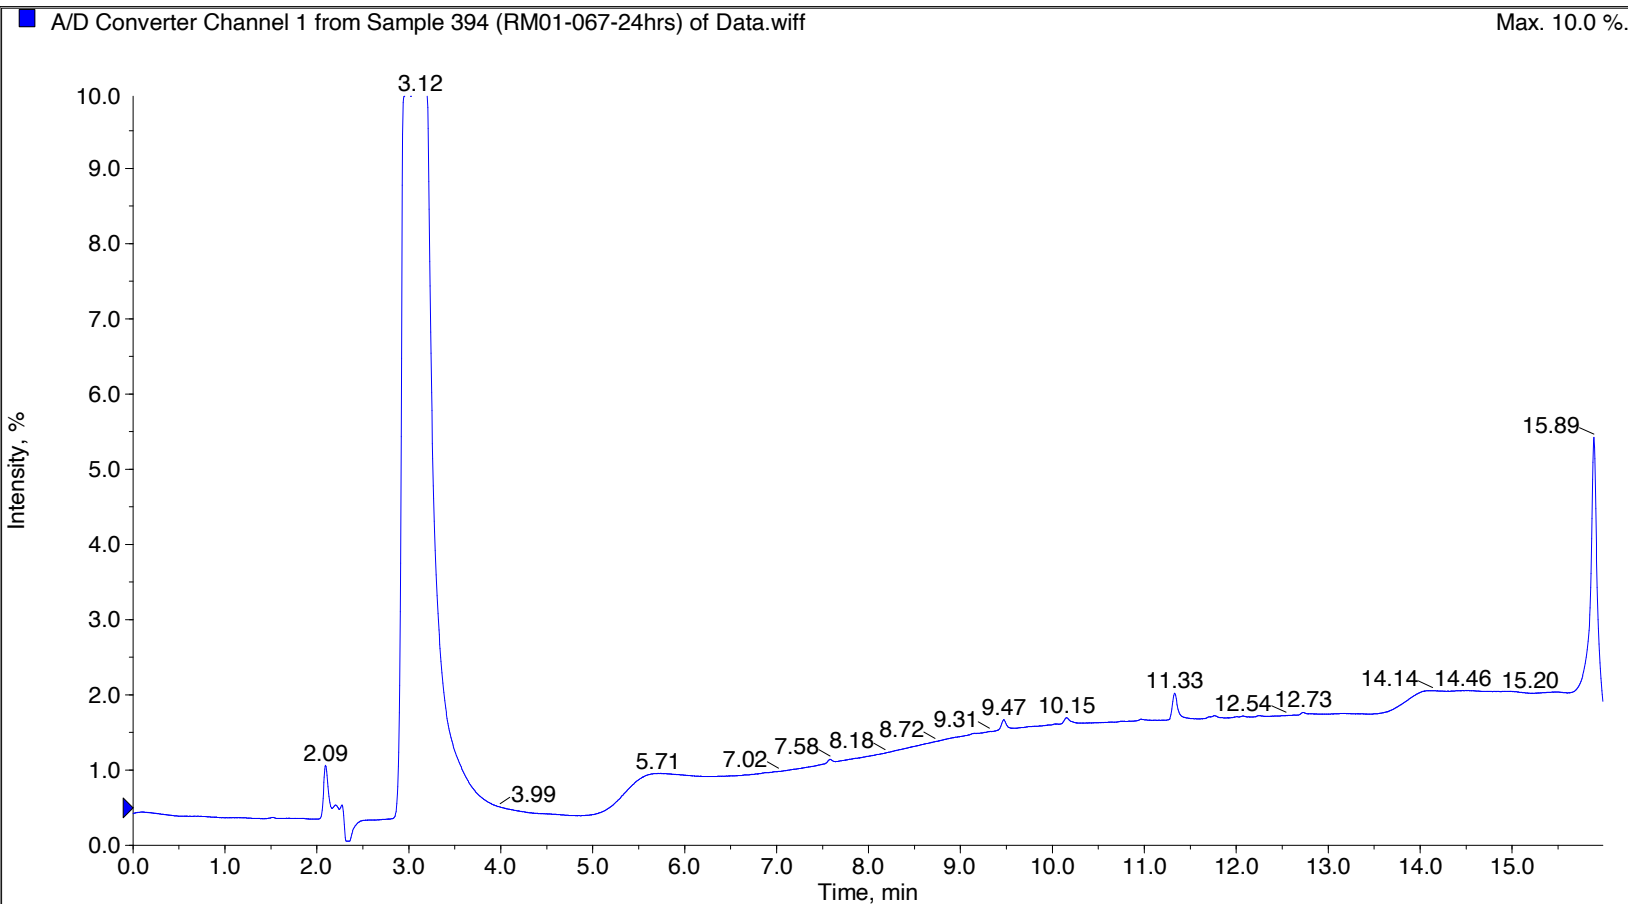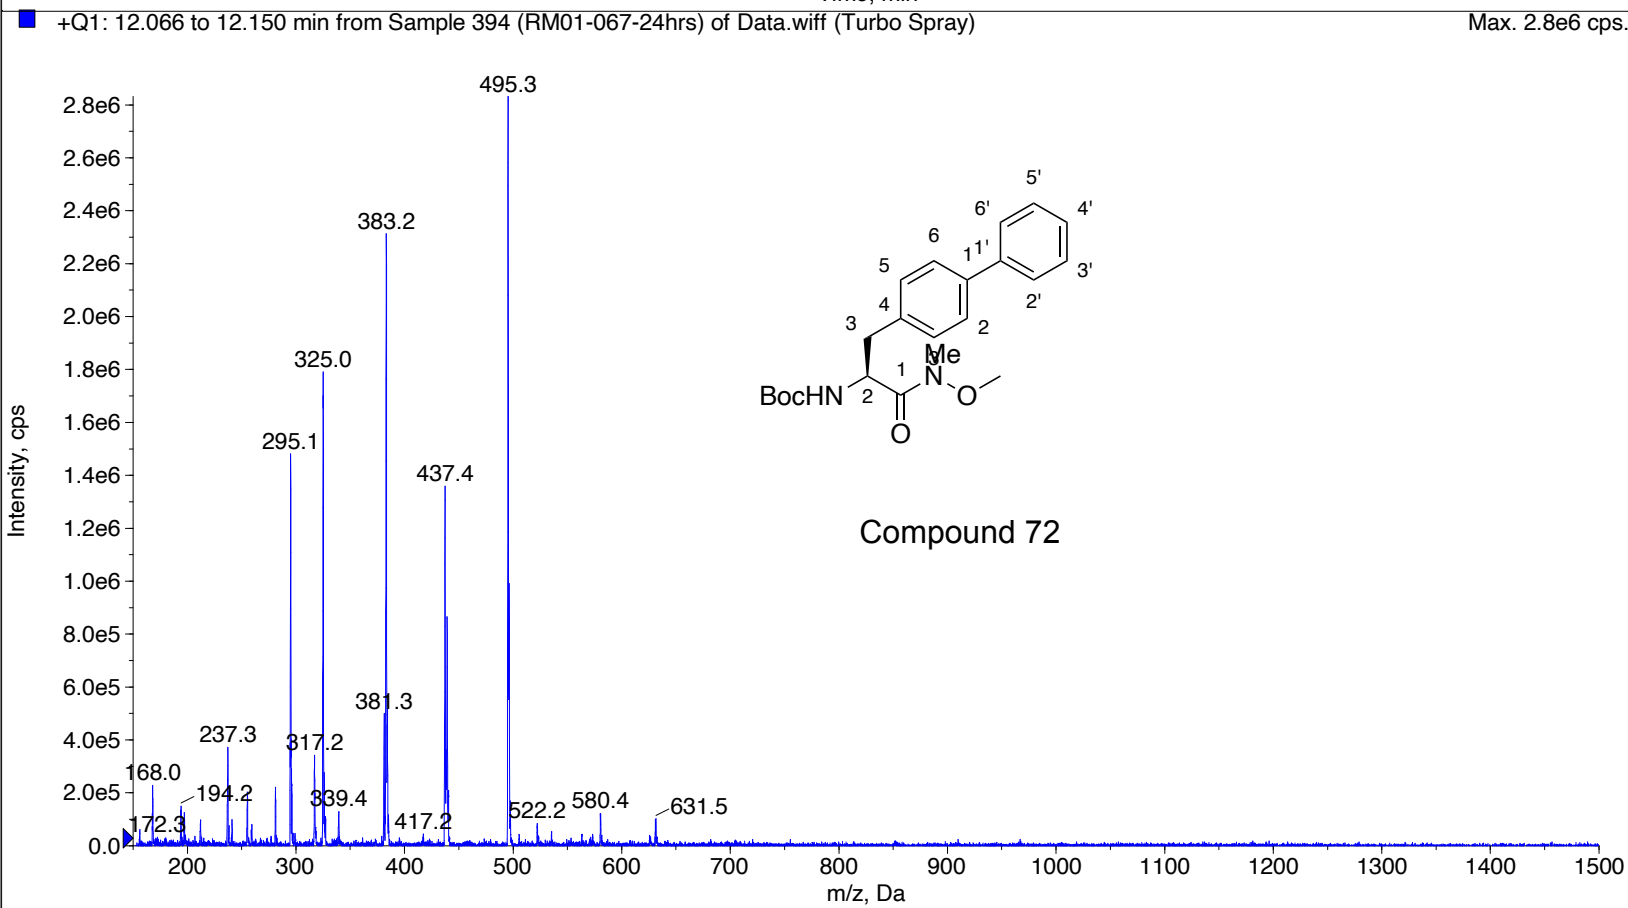



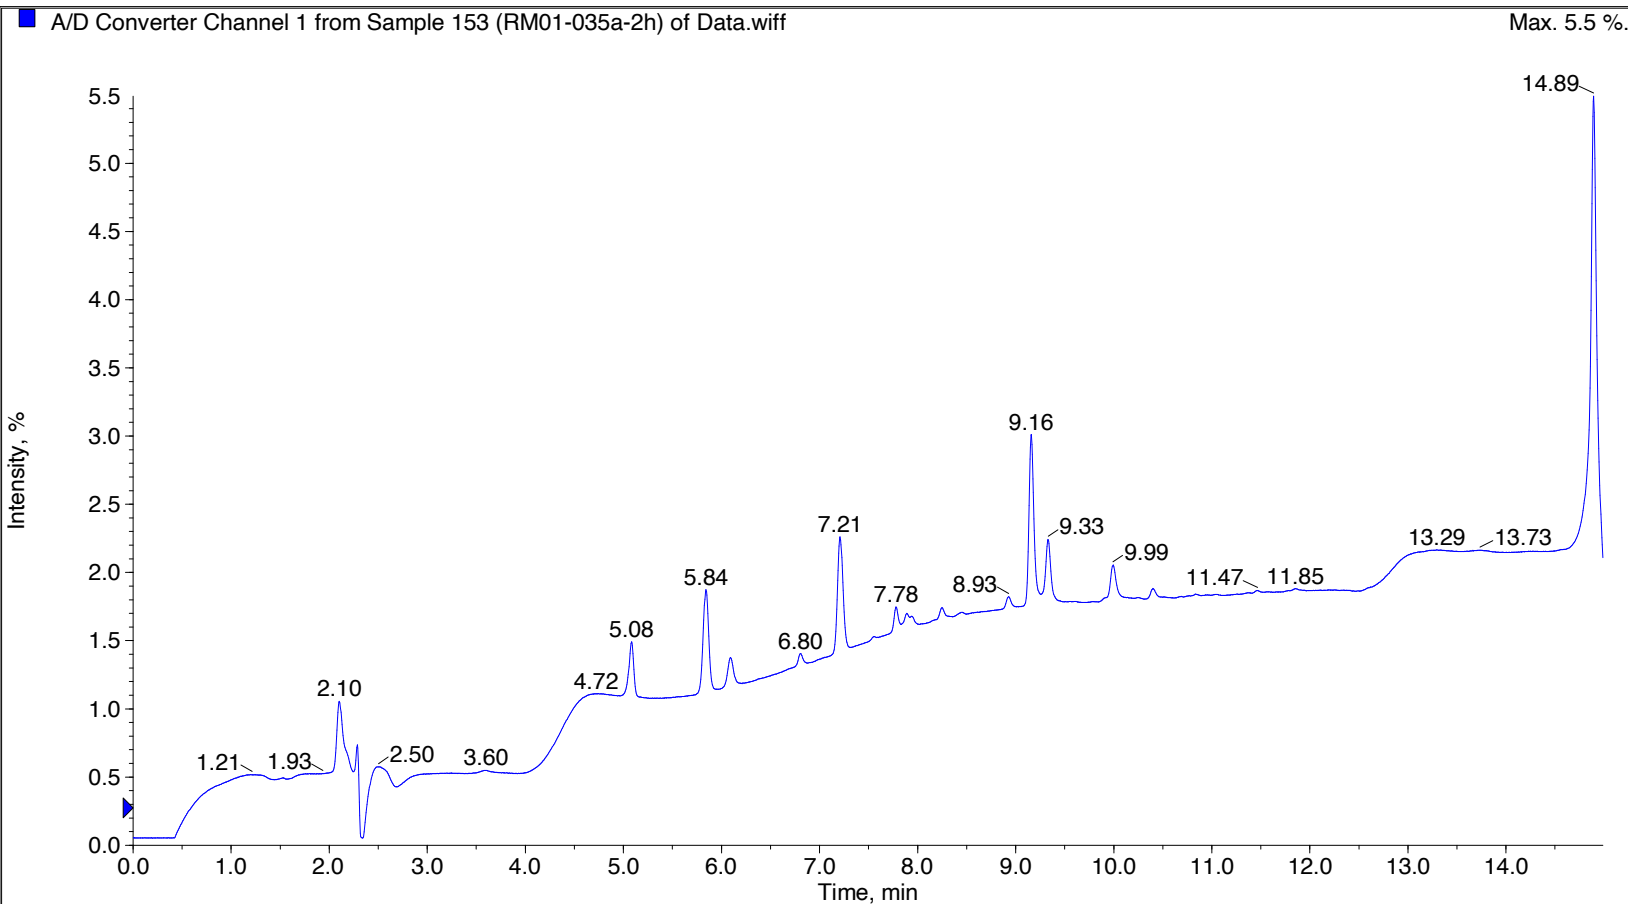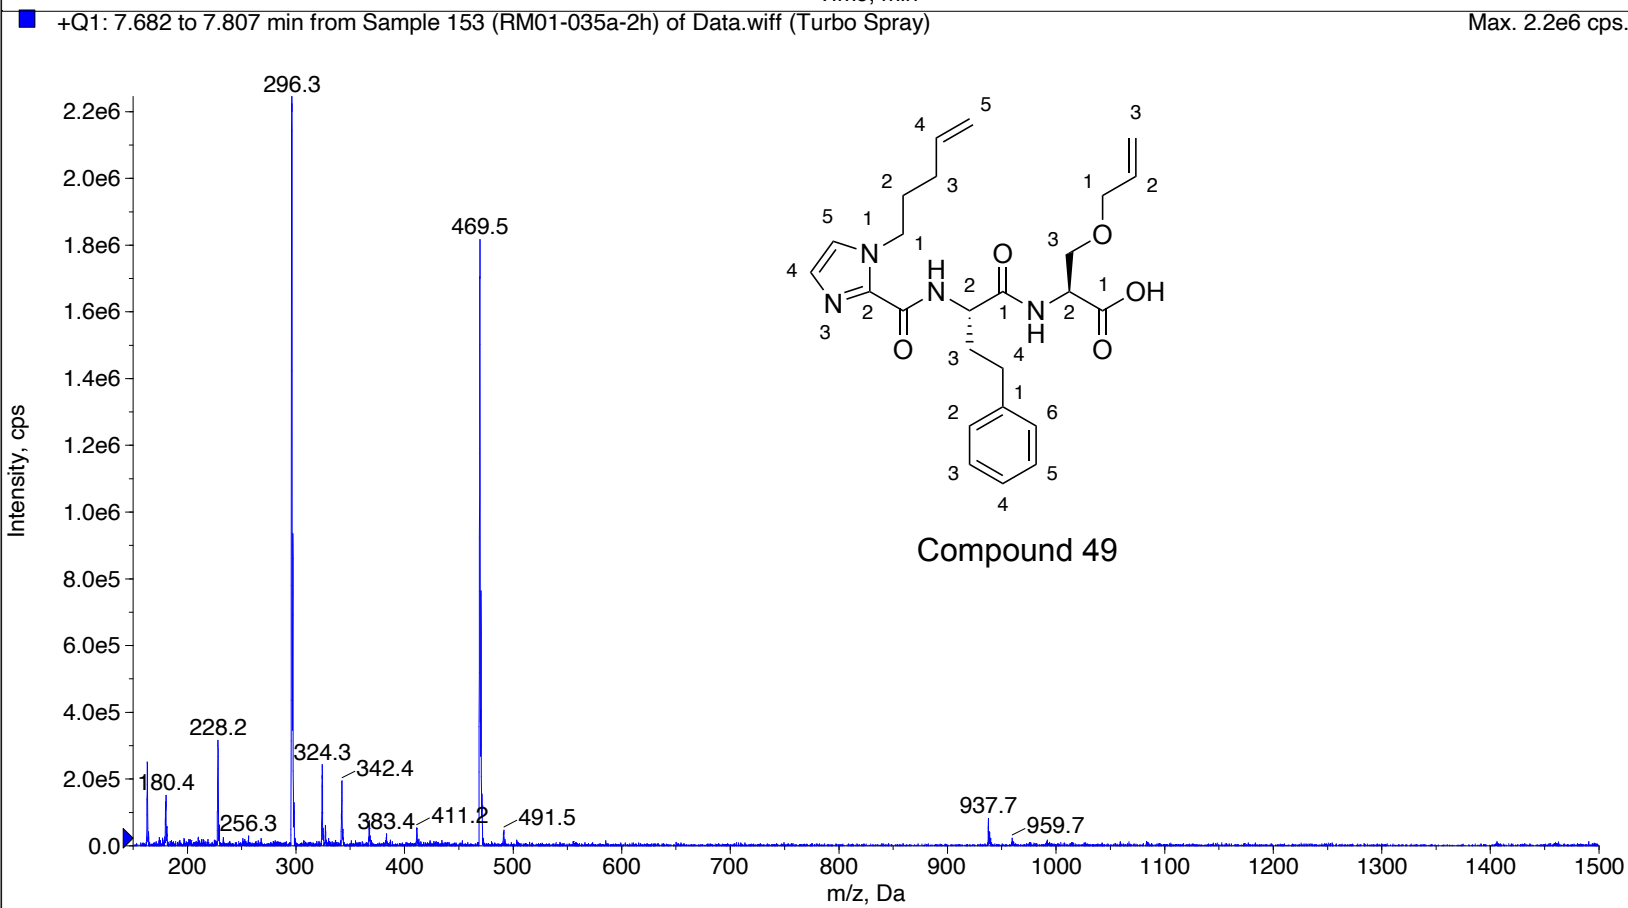

Supplement: NIHMS1932174-supplement-Supplement_2.pdf [file NIHMS1932174-supplement-Supplement_2.pdf]
